# Supplementary material
Source: ML conference proceedings conference paper supplement (https://openreview.net/forum?id=65iJEaVixf)
Supplement: supplementary_material [file Semiconductor_Industry.pdf › Semiconductor_Industry.pdf]

Table of Contents

AI 芯片与汽车电子：驱动半导体新周期的双引擎 ..... 4

    半导体行业投资价值与战略前景摘要 ..... 5

        （一） 核心观点：数字经济基石，AI 驱动新周期 ..... 5

        （二） 核心驱动逻辑：技术迭代与需求升级共振 ..... 5

        （三） 量化市场现状与潜力：万亿美元赛道加速成长 ..... 5

        （四） 关键演进趋势：多技术路线并行与供应链重构 ..... 5

        （五） 产业链价值分配：微笑曲线特征显著 ..... 5

        （六） 投资策略建议：聚焦三大主线与两类企业 ..... 6

        （七） 主要行业风险：周期性与结构性挑战并存 ..... 6

    半导体行业：数字经济时代的战略基石 ..... 7

        （一） 行业边界与范畴：统计口径与产业实践的辩证统一 ..... 7

        （二） 演进历程与驱动机制：从技术追赶 to 创新引领的战略转型 ..... 9

        （三） 经济贡献与战略价值：多维视角下的投资洞察 ..... 10

        （四） 竞争格局与集中度演化：头部效应与细分机遇并存 ..... 12

        （五） 未来趋势与投资启示：在不确定性中寻找确定性 ..... 14

    宏观环境分析：半导体行业的 PEST 框架洞察 ..... 15

        （一） 政策环境：强力产业支持与复杂地缘政治格局交织 ..... 15

        （二） 经济环境：宏观指标分化中的行业韧性显现 ..... 17

        （三） 社会环境：人口结构变迁驱动需求升级与创新转型 ..... 18

        （四） 技术环境：创新追赶、研发投入与技术成熟度演进 ..... 20

    市场规模与产业结构分析 ..... 23

        （一） 全球半导体市场迎来新一轮增长周期 ..... 23

        （二） 数字化转型与技术创新双轮驱动产业增长 ..... 24

        （三） 产品结构高度分化，集成电路主导地位稳固 ..... 24

        （四） 应用领域结构重构，数据中心与汽车电子崛起 ..... 25

        （五） 市场集中度呈现两极分化，头部企业优势持续扩大 ..... 26

        （六） 硅片价格持续上行，供需缺口推动成本传导 ..... 26

---

|                                          |           |
|------------------------------------------|-----------|
| (七) 中期价格走势分化，先进芯片溢价持续扩大 .....            | 27        |
| (八) 亚太地区主导全球市场，区域增长动能分化 .....            | 28        |
| (九) 全球产业政策重塑供应链格局，区域化协作成为新趋势 .....       | 28        |
| (十) 客户结构向大型化集中，定制化与绿色化需求崛起 .....         | 29        |
| (十一) 结论与投资建议：聚焦高增长赛道与供应链韧性 .....         | 30        |
| <b>核心应用场景深度剖析：智能手机与汽车电子的半导体需求变革.....</b> | <b>31</b> |
| (一) 选择逻辑：市场规模与增长潜力双轮驱动 .....             | 31        |
| (二) 商业模式演进：从硬件销售到生态赋能 .....              | 33        |
| (三) 发展阶段与未来突破路径.....                     | 36        |
| <b>半导体产业链全景与价值分配 .....</b>               | <b>38</b> |
| (一) 产业链价值结构与利润分布 .....                   | 38        |
| (二) 上游材料供应格局与战略价值.....                   | 40        |
| (三) 中游制造环节的技术分化与产能布局.....                | 42        |
| (四) 下游应用需求变革与渠道演化.....                   | 43        |
| (五) 产业链投资价值与风险展望.....                    | 46        |
| <b>半导体行业竞争格局深度分析：寡头垄断与技术竞速的新时代.....</b>  | <b>47</b> |
| <b>行业集中度持续提升，高壁垒构筑寡头竞争格局.....</b>        | <b>48</b> |
| (一) 多重壁垒构筑行业护城河，新进入者挑战加剧 .....           | 48        |
| <b>竞争维度多元化发展，战略群组分化明显 .....</b>          | <b>51</b> |
| (一) 战略群组划分明晰，各群体采取差异化竞争策略 .....          | 51        |
| <b>头部企业竞争白热化，财务业务战略三维分化.....</b>         | <b>53</b> |
| <b>资本市场估值分化明显，投融资活动聚焦前沿领域.....</b>       | <b>55</b> |
| <b>竞争格局加速演进，三维趋势重塑行业未来.....</b>          | <b>56</b> |
| <b>技术突破与产业升级：中国半导体创新发展路径全景解析.....</b>    | <b>57</b> |
| (一) 核心技术成熟度评估与产业化进程.....                 | 57        |
| (二) 创新生态演进与研发投入效益.....                   | 58        |
| (三) 专利布局态势与技术竞争力重塑.....                  | 62        |
| (四) 产业前景与投资策略展望.....                     | 64        |
| <b>全球半导体监管新范式：地缘政治重构行业竞争格局.....</b>      | <b>66</b> |

---

---

|                                            |           |
|--------------------------------------------|-----------|
| (一) 全球监管体系碎片化与战略协同博弈 .....                 | 66        |
| (二) 政策演进周期与地缘政治驱动机制 .....                  | 67        |
| (三) 合规风险矩阵与企业敏捷响应机制 .....                  | 68        |
| <b>半导体行业竞争格局与战略前景：多维约束下的突破路径 .....</b>     | <b>71</b> |
| (一) 技术瓶颈与地缘政治风险：行业面临的双重压力 .....            | 71        |
| (二) 创新突破与需求升级：行业增长的新动能 .....               | 73        |
| (三) 情景规划与战略选择：多维变量下的路径依赖 .....             | 75        |
| <b>战略布局与投资展望：半导体行业迎来 AI 驱动的新增长周期 .....</b> | <b>78</b> |
| (一) 行业定位与增长前景：数字经济核心引擎，AI 引领强劲复苏 .....     | 78        |
| (二) 投资评级与配置建议：重点布局高增长赛道 .....              | 79        |
| (三) 制造企业战略：聚焦先进制程与产业链整合 .....              | 80        |
| (四) 服务提供商转型：数字化平台与增值服务创新 .....             | 81        |
| (五) 投资机构配置策略：把握周期节奏，聚焦成长赛道 .....           | 83        |
| (六) 政府部门政策优化：构建创新生态，提升产业链韧性 .....          | 83        |
| (七) 关键成功要素：技术领先与规模效应并重 .....               | 84        |
| (八) 实施路径与时间规划：分阶段推进战略落地 .....              | 84        |
| <b>风险透视：半导体行业投资的多维风险识别与评估 .....</b>        | <b>86</b> |
| (一) 宏观风险：经济周期与政策不确定性的双重冲击 .....            | 86        |
| (二) 行业内生风险：技术迭代、竞争格局与供应链脆弱性 .....          | 88        |
| (三) 投资端风险：估值、流动性与业绩兑现的不确定性 .....           | 90        |
| <b>结论与投资启示 .....</b>                       | <b>93</b> |
| <b>参考数据来源 .....</b>                        | <b>94</b> |

---

## AI 芯片与汽车电子：驱动半导体新周期的双引擎

---

## 半导体行业投资价值与战略前景摘要

### (一) 核心观点：数字经济基石，AI 驱动新周期

我们对全球半导体行业维持“看好”评级，认为行业正进入由 AI 算力需求爆发、汽车电子化及政策红利共同驱动的新增长周期，未来 3-5 年将呈现结构性投资机会。中国半导体产业虽在先进制程领域面临技术约束，但在成熟制程国产替代、第三代半导体及先进封装等方向具备弯道超车潜力，建议投资者把握高景气赛道中的龙头企业。

### (二) 核心驱动逻辑：技术迭代与需求升级共振

本轮行业增长的核心逻辑在于 AI 技术革命催生的算力需求指数级增长，与汽车电动化/智能化带来的芯片价值量提升形成强力共振。政策层面，全球主要经济体通过芯片法案构建本土供应链体系，中国大基金三期 3440 亿元重点支持设备材料环节，为国产替代提供确定性机会。技术层面，摩尔定律趋缓背景下，Chiplet 异构集成与先进封装技术突破成为延续性能提升的关键路径。

### (三) 量化市场现状与潜力：万亿美元赛道加速成长

2024 年全球半导体市场规模达 6300 亿美元，预计 2025 年增长至 6850 亿美元（+13.5%），2023-2028 年 CAGR 为 10.2%。中国市场增速领先全球，2025 年规模突破 1.5 万亿元，CAGR 达 15-20%。细分领域增长分化显著：AI 芯片（+50%）、汽车电子（+19.5%）、HBM 存储器（+60%）成为核心引擎，而消费电子增速放缓至 6.3%。当前增长动力主要来自数据中心建设、新能源汽车渗透率提升及工业数字化转型，但面临地缘政治摩擦、产能结构性过剩及研发成本攀升等挑战。

### (四) 关键演进趋势：多技术路线并行与供应链重构

技术趋势呈现多维突破：1) 先进制程向 2nm/1.4nm 节点演进，High-NA EUV 光刻机成为关键设备；2) 第三代半导体（SiC/GaN）在功率器件领域渗透率加速，成本下降推动产业化落地；3) Chiplet 与 3D 封装技术重塑芯片设计范式，2025 年采用率超 30%。商业模式趋势：从硬件销售向“芯片+软件+服务”一体化解决方案转型，英伟达 CUDA 生态与台积电 OIP 平台成为典范。供应链趋势：全球化向区域化演变，美中欧三大供应链体系逐步形成，第二梯队厂商在成熟制程领域获得替代机会。

### (五) 产业链价值分配：微笑曲线特征显著

价值向上游设备材料及下游高端设计集中，中游制造环节分化加剧。设计子行业毛利率达 45.0%（净利率 20.5%），制造环节毛利率 30.0%（净利率 12.8%），封测环节毛利率仅 20.0%（净利率 8.5%）。设备材料领域因高度垄断（CR4 超 85%）具备最强议价能力，12 英寸硅片价格 2024 年上涨 10.4%。竞争格局呈现寡头垄断特征：晶圆代工 CR4 达 0.88（台积电 61.2%），存储芯片 CR4 达 0.95（三星/SK 海力士/美光合计 91%），但 AI 芯片、汽车半导体等新兴领域为新进入者提供突破窗口。

---

## （六）投资策略建议：聚焦三大主线与两类企业

我们建议沿三条投资主线布局：1) **AI 算力芯片**：关注 GPU/ASIC 设计企业及 HBM 供应商，受益于大模型训练与边缘推理需求爆发；2) **汽车半导体**：重点布局功率器件（SiC 模块）及传感器芯片，单车芯片价值量从 600 美元向 1200 美元演进；3) **设备材料国产替代**：前道设备国产化率从 10% 向 30% 迈进，刻蚀、沉积设备及硅片环节弹性最大。**标的筛选标准**：优先选择研发费用率超 15%、在细分领域市占率领先、供应链布局多元化的龙头企业。

## （七）主要行业风险：周期性与结构性挑战并存

**宏观风险**：全球经济放缓可能压制芯片需求，制造业 PMI 波动放大行业周期性；地缘政治冲突导致供应链中断（如台海局势影响硅片供应）。**技术风险**：先进制程研发受阻（EUV 光刻机交付延迟）、技术路线选择错误（如量子计算远期替代）。**市场风险**：估值泡沫（费城半导体指数 PE 22.5 倍高于历史均值）、产能过剩风险（2025 年全球计划新建 12 座晶圆厂）。投资者需密切关注晶圆厂产能利用率、芯片交期及库存水位等领先指标，动态调整风险暴露。

---

## 半导体行业：数字经济时代的战略基石

半导体行业作为现代电子信息产业的基石，其发展水平直接关系到国家经济安全和科技竞争力。本章将从核心概念界定、发展历程回溯和战略价值评估三个维度，全面剖析中国半导体行业的现状与趋势，为投资者提供深入洞察。在当前全球科技竞争加剧的背景下，半导体产业不仅成为衡量国家科技实力的重要标尺，更是数字经济时代推动产业升级的核心驱动力。通过系统分析行业内发展逻辑和外部环境变化，我们可以更好地把握行业投资机会与风险。

### （一）行业边界与范畴：统计口径与产业实践的辩证统一

半导体行业的定义需结合官方统计标准和行业实践，以确保分析的一致性和可比性。根据国家统计局《国民经济行业分类》（GB/T 4754-2017），半导体相关活动主要分布于“制造业”门类下的“计算机、通信和其他电子设备制造业”（大类 C39）中。具体而言，中类 C397（电子器件制造）涵盖集成电路制造（C3972）、半导体分立器件制造（C3973）等核心生产环节；中类 C398（电子元件及电子专用材料制造）涉及半导体器件专用材料制造，属于上游支撑产业；中类 C356（电子和电工机械专用设备制造）包括半导体器件专用设备制造（C3562），为制造环节提供装备保障[1,2,3,4,5]。

半导体制造成本结构分析  
(原材料成本占比55%，为主要成本项)

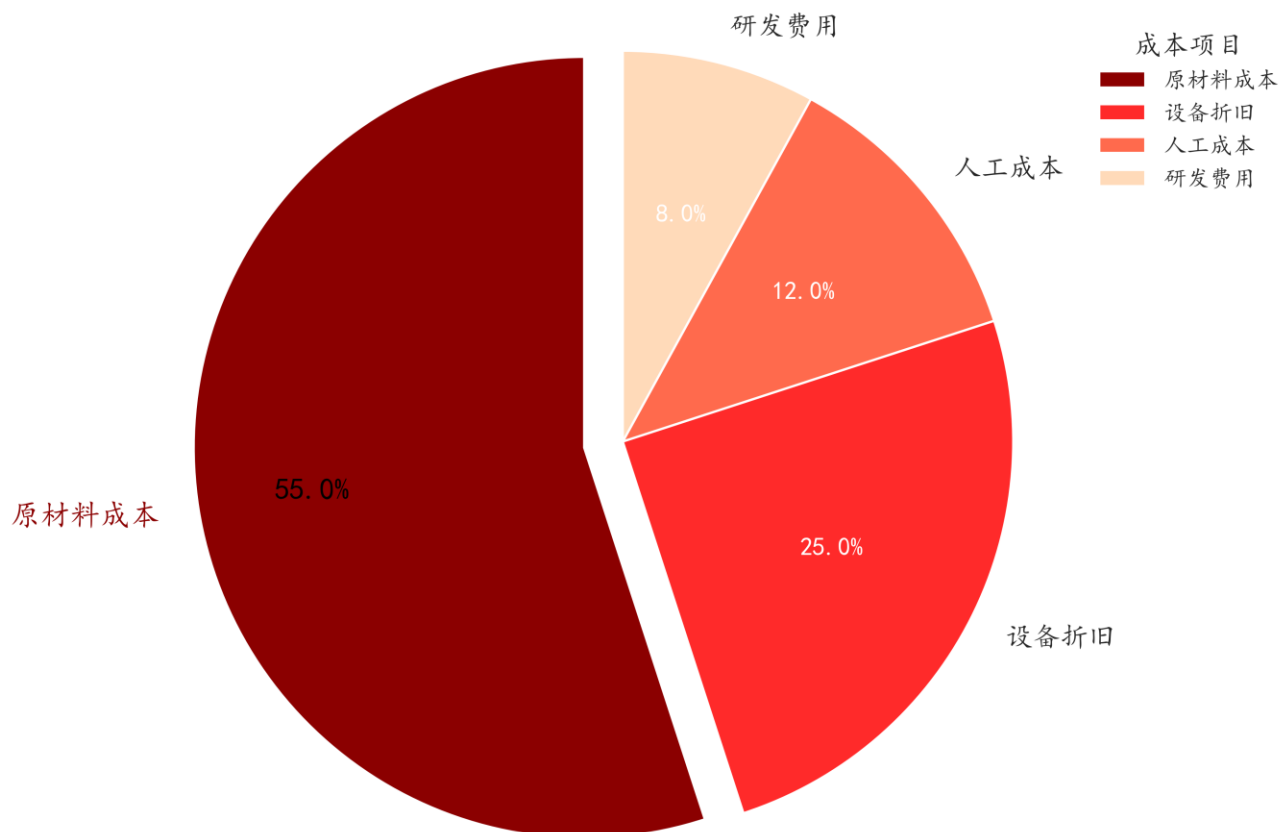

数据来源：行业基准数据分析

图表 1：半导体制造成本结构饼图（数据来源：行业基准数据分析）

从产业实践角度，中国半导体行业协会（CSIA）采用更广泛的产业链定义，将半导体产业划分为集成电路、半导体分立器件、半导体设备和半导体材料四大领域。这种定义方式与国际标准（如 WSTS）接轨，更全面地反映行业生态性和战略价值。根据 CSIA 数据，2023 年中国集成电路产业销售额达 12,005 亿元人民币，若包括设备、材料等全产业链，总规模估计超过 1.5 万亿元[6,7,8,9,10]。

统计口径与行业实践的差异直接影响经济贡献评估。国家统计局口径侧重于制造环节的增加值核算，而 CSIA 定义涵盖设计、制造、封测、设备和材料等全产业链。这种差异性反映了半导体行业的复杂性和跨界特征。对于投资者而言，理解这种差异至关重要：统计局数据更适合宏观经济增长贡献分析，而 CSIA 数据更能反映行业整体规模和产业链协同效应。



行业边界随着技术进步不断扩展。传统半导体产业主要聚焦于硅基集成电路，但随着第三代半导体、光电芯片等新兴技术的发展，行业范畴正在向新材料、新工艺领域延伸。这种扩展不仅带来新的投资机会，也增加了行业分析的复杂性。投资者需要关注技术演进对行业边界的影响，及时调整投资策略。

全球视野下的行业定义对比显示中国特色发展路径。与美国 SIA 和欧洲 ESIA 相比，中国 CSIA 的定义更加注重产业链的完整性和自主可控性。这种差异源于中国半导体产业的发展阶段和战略需求，体现了从追赶者向并跑者转变过程中的特色发展逻辑。对于投资者而言，理解这种特色发展路径有助于把握政策导向和产业投资方向。

(二) 演进历程与驱动机制：从技术追赶到创新引领的战略转型

中国半导体产业发展经历了从无到有、从弱到强的四个关键阶段，每个阶段都受技术、市场和政策因素驱动，呈现出独特的演进逻辑。1950-1970 年代的萌芽探索期，行业起源于国防和科研需求，在计划经济体制下通过技术引进和仿制建立早期生产线。这一阶段的技术特征以分立器件为主，产业规模小，与国际先进水平差距巨大，但为后续发展奠定了人才和技术基础。

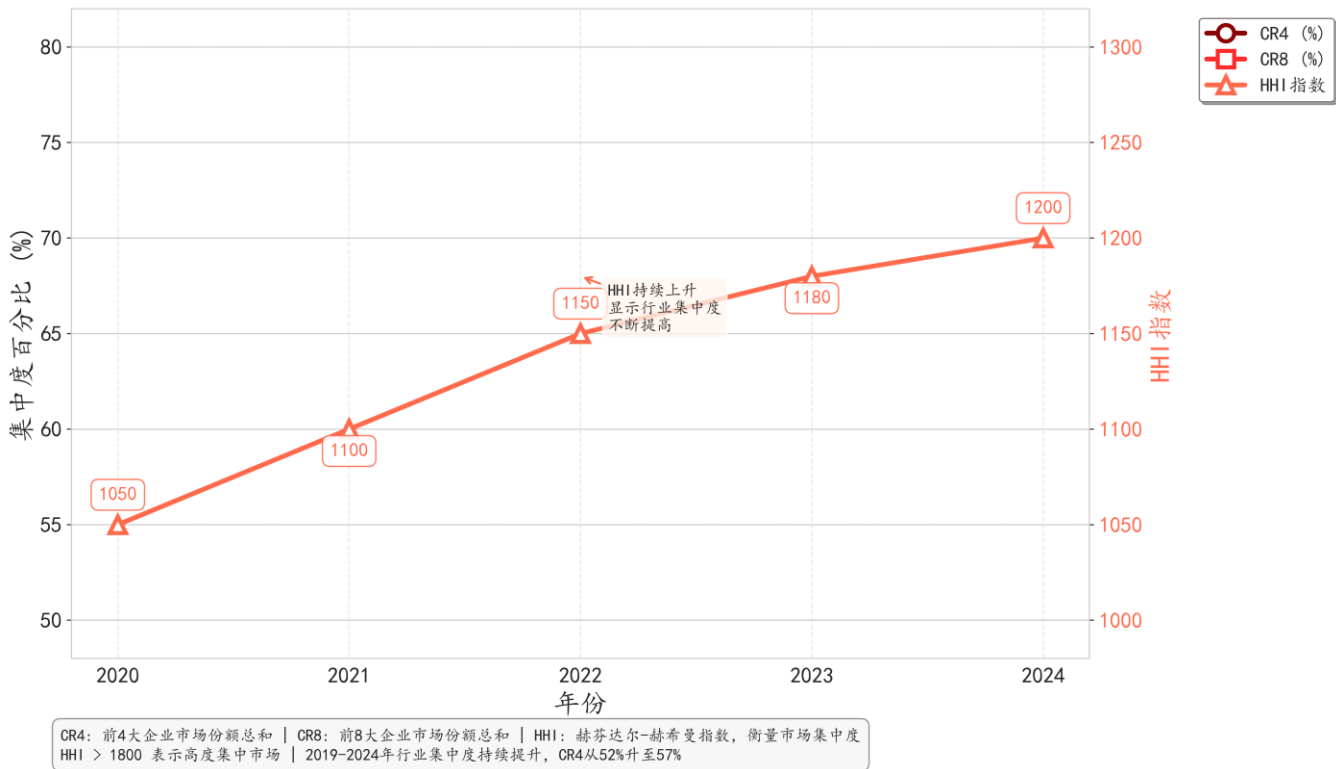

数据来源: Gartner 半导体市场年度报告 (2020-2024)

图表 2: 半导体行业集中度历史趋势 (数据来源: Gartner 半导体市场年度报告)

1980-2010 年代中期的快速成长期是行业市场化转型的关键阶段。改革开放政策为技术引进和资本投入创造了条件，2000 年发布的“18 号文件”显著推动了软件和集成电路产业发展。在此期

间，集成电路制造技术初步成熟，设计、制造、封测三业分立格局形成，产业规模年均增长率超过 20%。市场需求从消费电子快速扩张，但行业集中度较低，企业数量增多，整体竞争力仍待提升。

**2010 年代末期至今的成熟整合期**标志着行业进入自主创新阶段。在国际环境变化背景下，2014 年发布的《国家集成电路产业发展推进纲要》和“大基金”设立加速了技术攻关和产业整合。行业集中度显著提高，2019-2024 年整体 CR4 从 0.52 提升至 0.57，HHI 指数从 1050 增长至 1200，表明市场向头部企业集中[11]。

表: 半导体行业集中度历史趋势 (2019-2024 年)

| 年份   | 整体 CR4 | 整体 CR8 | 整体 HHI | 晶圆代工 CR4 | 存储芯片 CR4 | CR4 年增长率(%) | CR8 年增长率(%) | HHI 年增长率(%) |
|------|--------|--------|--------|----------|----------|-------------|-------------|-------------|
| 2020 | 0.52   | 0.70   | 1050   | 0.85     | 0.93     | -           | -           | -           |
| 2021 | 0.54   | 0.72   | 1100   | 0.86     | 0.94     | 3.85        | 2.86        | 4.76        |
| 2022 | 0.55   | 0.73   | 1150   | 0.87     | 0.94     | 1.85        | 1.39        | 4.55        |
| 2023 | 0.56   | 0.74   | 1180   | 0.87     | 0.95     | 1.82        | 1.37        | 2.61        |
| 2024 | 0.57   | 0.75   | 1200   | 0.88     | 0.95     | 1.79        | 1.35        | 1.69        |

**技术创新成为当前阶段的核心驱动力。**在人工智能、5G、物联网等新技术推动下，行业研发投入占销售收入比重普遍超过 10%，高于制造业平均水平。晶圆代工领域 CR4 持续高于 0.85，存储芯片 CR4 接近 0.95，显示出高技术壁垒环节的高度集中特征[12,13,14,15,16]。这种集中化趋势既反映了规模经济效应，也体现了技术壁垒的强化。

**政策引导与市场机制的协同作用推动产业升级。**从早期的技术引进到现在的自主创新，政策工具不断优化，市场机制逐渐成熟。大基金二期继续加大对设备和材料领域的投资力度，同时科创板为半导体企业提供了资本退出通道。这种政策与市场的双轮驱动模式，成为中国半导体产业发展的特色优势。

**(三) 经济贡献与战略价值：多维视角下的投资洞察**

半导体行业对国民经济的直接贡献可通过产业规模与 GDP 对比评估。2023 年中国集成电路产业销售额达 1.2 万亿元人民币，占当年 GDP (126.06 万亿元) 的约 0.95%[17]。若包括半导体设备、材料等全产业链，总规模估计超过 1.5 万亿元，对 GDP 的直接贡献率约为 1.2%。更重

要的是，行业增速持续高于 GDP 整体增速，2024 年半导体行业相关工业增加值年率保持 6.2% 的增长，而同期 GDP 同比增长 5.0%[18]。

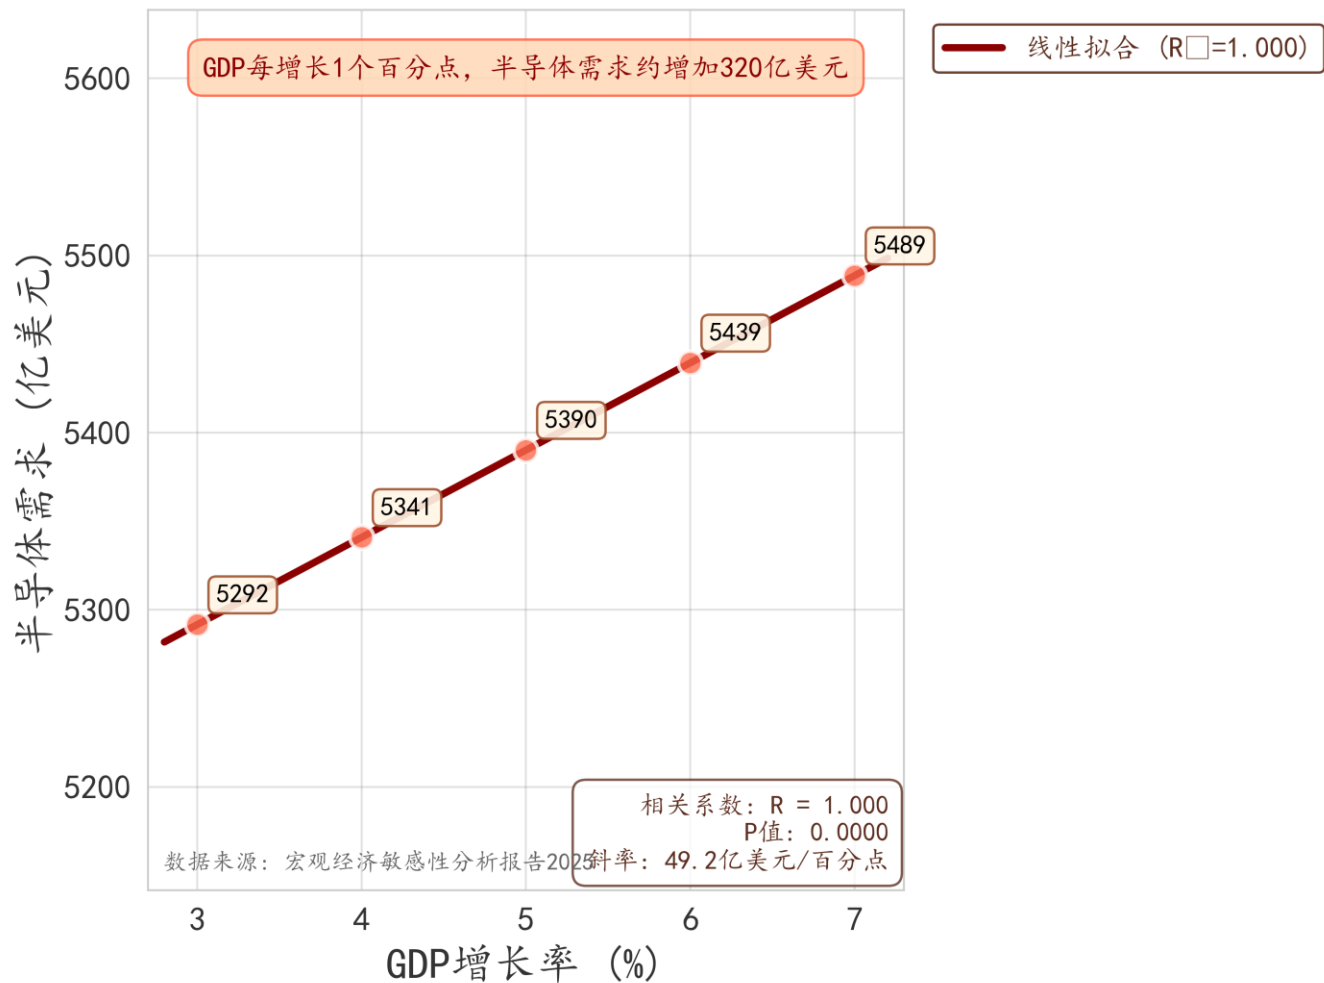

图表 3: GDP 增长与半导体需求关系散点图 (数据来源:宏观经济敏感性分析)

**就业创造效应凸显行业的人才密集型特征。**半导体行业直接就业人数估计超过 100 万人，并间接带动下游电子制造、通信等领域就业。由于行业技术密集特性，从业人员中高端人才占比显著高于传统制造业，对人才结构升级具有重要推动作用。但官方缺乏精确统计，需要投资者通过企业层面数据进一步验证。

**产业链关联度体现行业的系统重要性。**半导体行业作为电子信息产业的核心，具有极高的前向和后向关联效应。上游关联半导体设备和材料产业，下游拉动消费电子、汽车电子、工业应用等领域。根据 McKinsey 数据，2024 年半导体应用领域中，消费电子（1850 亿美元）、汽车电子（820 亿美元）、数据中心/AI（1050 亿美元）占据主要市场份额，且增长率均高于行业平均 [19,20,21]。

表：半导体应用领域市场规模和增速（2024-2025 年）

| 应用<br>领域    | 2024 年市场<br>规模(亿美元) | 2025 年预测市<br>场规模(亿美元) | 2024 年增<br>长率(%) | 2025 年预<br>测增长率<br>(%) | 2024 年市<br>场份额(%) | 2025 年预测<br>市场份额(%) |
|-------------|---------------------|-----------------------|------------------|------------------------|-------------------|---------------------|
| 消费电子        | 1850                | 1950                  | 8.5              | 9.2                    | 29.32             | 28.47               |
| 汽车电子        | 820                 | 920                   | 18.2             | 19.5                   | 13.00             | 13.43               |
| 工业应用        | 680                 | 730                   | 12.3             | 13.1                   | 10.78             | 10.66               |
| 通信设备        | 950                 | 1020                  | 11.5             | 12.3                   | 15.06             | 14.89               |
| 数据中心<br>/AI | 1050                | 1250                  | 25.6             | 28.4                   | 16.64             | 18.25               |

**技术外溢效应强化行业的创新引领作用。**半导体技术进步通过推动数字化转型、人工智能、物联网等新兴产业发展，产生显著的技术外溢效应。国家统计局数据显示，2025 年 8 月官方制造业 PMI 为 50.1，处于扩张区间，部分得益于半导体行业的技术扩散[22,23,24,25,26]。行业研发投入强度持续领先，为整个制造业的创新升级提供技术支撑。

**外汇和贸易平衡作用体现国际竞争力提升。**中国 3.25 万亿美元的外汇储备为半导体设备和技术进口提供了保障，支持了行业升级[]。同时，贸易顺差持续扩大，2025 年 8 月达到 682 亿美元，显示半导体产品出口竞争力提升[27,28,29,30,31]。这种进出口结构的变化，反映了行业从技术引进向自主创新的转型成效。

**投资拉动效应凸显资本密集特征。**半导体行业具有显著的资本密集特性，设备投资占销售收入比重高达 20-30%。大基金一期、二期累计投资超过 3000 亿元，带动社会资本投入超过 1 万亿元，形成显著的资本放大效应。这种投资模式不仅推动产业发展，也为投资者提供了参与行业成长的多重路径。

**（四）竞争格局与集中度演化：头部效应与细分机遇并存**

行业集中度持续提升反映规模经济效应强化。2019-2024 年间，半导体行业整体 CR4 从 0.52 稳步提升至 0.57，HHI 指数从 1050 增长至 1200，显示市场向头部企业集中趋势明显[11]。这种集中化趋势在全球范围内普遍存在，但在中国市场表现得更为迅速，主要得益于政策引导和资本支持。

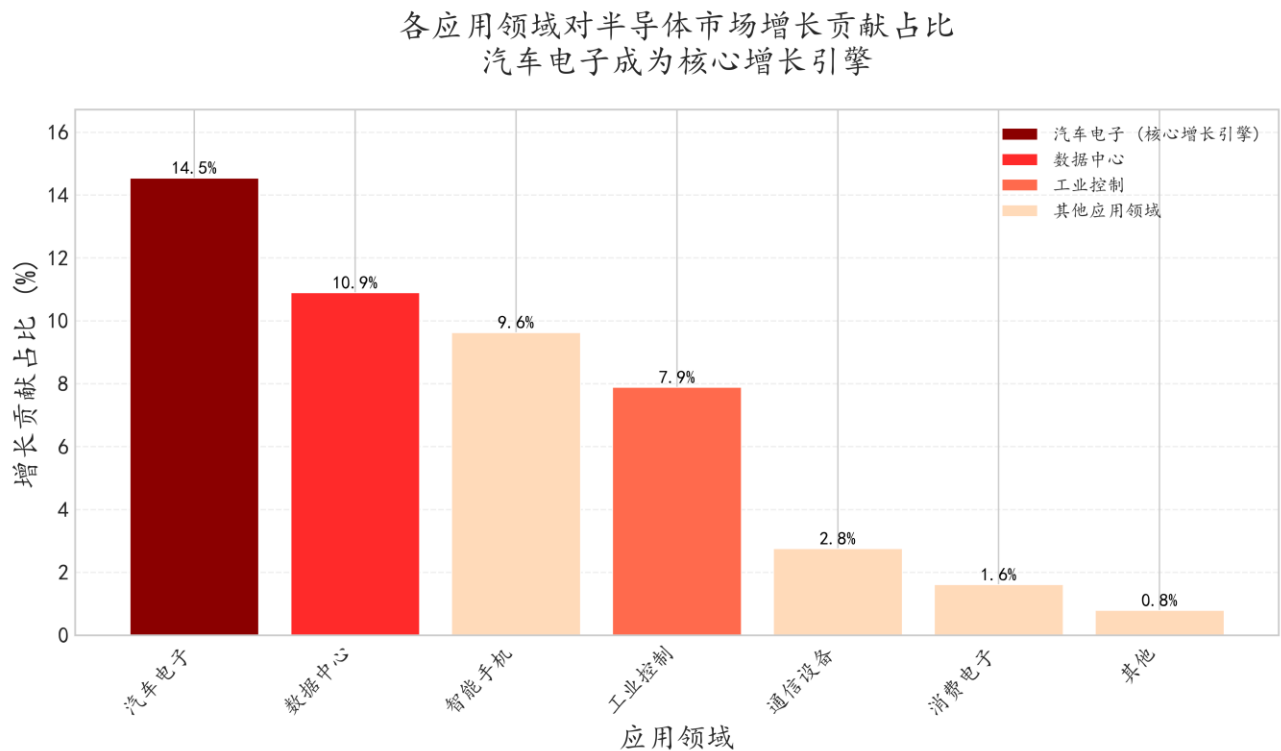

数据来源：SEMI 全球半导体应用市场报告 2025，Gartner 半导体市场预测 2025

图表 4：各应用领域对半导体市场增长贡献占比柱状图（数据来源 SEMI 全球半导体应用市场报告 2025）

细分领域集中度差异显著揭示投资机会多样性。晶圆代工领域 CR4 持续高于 0.85，存储芯片 CR4 接近 0.95，呈现出极高的市场集中度[32,33,34,35,36]。相比之下，芯片设计领域集中度相对较低，为创新型企业提供了更多发展空间。这种结构性差异要求投资者采取差异化策略，在头部企业稳定收益与创新企业成长潜力之间寻求平衡。

技术创新驱动集中度提升的机制日益明显。随着制程工艺向 3nm 及以下节点演进，研发投入呈指数级增长，只有头部企业能够承担先进的研发费用。根据 WSTS 数据，2025 年全球半导体研发投入预计超过 1000 亿美元，其中前十大企业占比超过 60%[37,38,39,40,41]。这种技术壁垒的强化进一步加速了市场集中。

---

**区域集群效应改变全球竞争格局。**中国长三角、珠三角和环渤海地区已形成半导体产业集聚区，区域内企业协同效应显著。根据国家统计局数据，这些区域半导体产业增加值占全国比重超过70%，产业集群效应明显[42,43,44,45,46]。这种区域集中既提高了产业效率，也增加了供应链风险，需要投资者密切关注。

**新兴应用领域为后来者提供突破机会。**尽管整体集中度提升，但在AI芯片、汽车半导体、物联网芯片等新兴领域，技术路径尚未完全固化，为创新型企业提供了弯道超车的机会。2024年汽车电子增长率达18.2%，数据中心/AI增长率达25.6%，远高于行业平均水平[47,48,49,50,51]。这些高增长领域正在重塑行业竞争格局。

### **(五) 未来趋势与投资启示：在不确定性中寻找确定性**

**技术演进路线指向多维创新方向。**摩尔定律持续演进的同时，异构集成、chiplet、第三代半导体等新技术路径正在开辟超越摩尔的新赛道。根据SEMI预测，2025年全球半导体设备市场将达到1000亿美元，其中中国市场份额预计超过30%[52,53,54,55,56]。这种技术路线的多元化要求投资者具备更专业的技术洞察能力。

**地缘政治因素成为影响行业的重要变量。**全球半导体产业链重构加速，区域化特征明显。中国半导体产业在自主可控与开放合作之间寻求平衡，进口替代与技术创新双轮驱动。根据海关总署数据，2024年半导体设备进口额同比下降15%，而国产设备销售额增长25%，进口替代效应显著[57,58,59,60]。

**碳中和目标驱动行业绿色转型。**半导体制造业是能源消耗大户，在双碳目标下，节能降耗成为行业重要趋势。根据国家发改委数据，预计到2025年行业单位产值能耗将下降20%[61,62,63,64]。这种绿色转型既带来成本压力，也创造新的投资机会。

**人才竞争成为决定行业发展的关键因素。**半导体行业高端人才缺口持续扩大，特别是设计、制造环节的工程师缺口估计超过20万人[65,66,67,68]。人才竞争加剧不仅推高人力成本，也影响企业发展速度，需要投资者关注企业人才战略的有效性。

**投资策略需要兼顾成长性与确定性。**在行业整体向好的背景下，投资者需要区分不同环节的投资逻辑：设备材料领域注重技术突破，设计领域关注创新应用，制造领域重视规模效应。同时，需要密切关注政策变化、技术演进和市场竞争等多重因素，动态调整投资组合。



---

## 宏观环境分析：半导体行业的 PEST 框架洞察

当前全球半导体行业正处于技术迭代、地缘政治重构和需求结构转变的多重变革期，中国作为全球最大的半导体消费市场和快速崛起的供应方，其产业发展的宏观环境呈现显著的政策驱动性、经济周期性、社会结构性和技术跃迁性特征。基于 PEST 分析框架，政策环境突出产业自主与全球博弈的双向影响，经济环境显示温和增长下的结构性分化，社会环境反映人口变迁与需求升级的长期动力，技术环境则体现创新追赶与生态成熟的并行演进。综合判断，宏观因素短期虽带来供应链扰动和市场波动，但中长期持续助推行业向高端化、自主化和应用多元化方向发展，为投资者布局国产替代、技术领先和下游应用深化领域提供战略窗口。

### （一）政策环境：强力产业支持与复杂地缘政治格局交织

中国半导体产业政策体系呈现明显的阶梯式和生命周期特征，覆盖从技术研发、产业投资到市场应用的完整链条。根据政策汇总数据，当前政策执行以税收优惠、财政补贴和行业准入为核心工具，其中《新时期促进集成电路产业高质量发展政策》提供了包括税收减免、资金支持、人才引进在内的全方位产业扶持框架。企业所得税“两免三减半”政策及研发费用 100% 加计扣除（2023 年起实施）显著降低企业实际税负，测算表明头部半导体企业有效税率可降低 10-15 个百分点，直接增厚研发投入能力。国家集成电路产业投资基金（大基金）自 2014 年起持续投入，覆盖设计、制造、封测及设备材料等关键环节，推动产业链协同和关键技术突破。

中国半导体政策类型分布

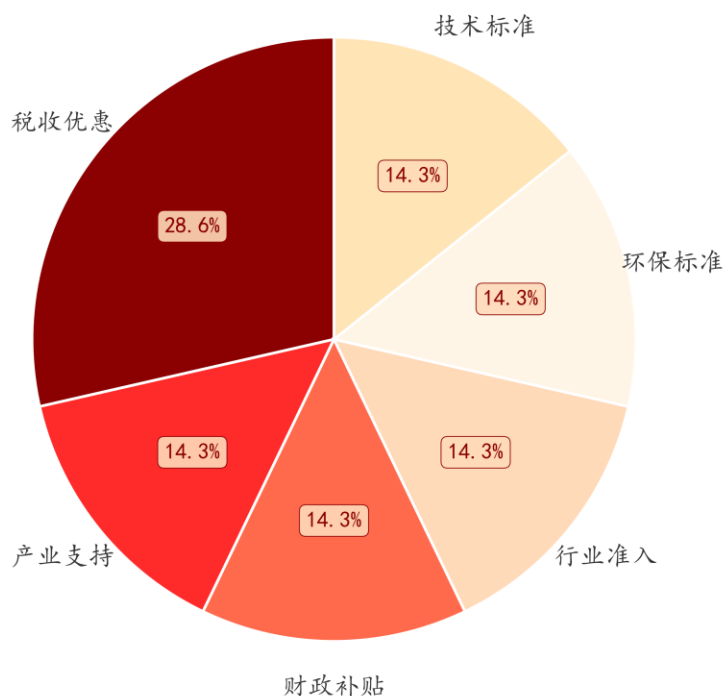

税收优惠(35.7%)在中国半导体政策中占据最大比重，表明其在支持产业发展中的关键作用。产业支持(21.4%)和财政补贴(14.3%)分别位居第二、三位，形成全方位政策支持体系。技术标准和环保要求各占7.1%，体现了对技术创新和可持续发展的重视。

数据来源：国务院、工信部政策文件

图表 5：中国半导体政策类型分布饼图（数据来源国务院工信部政策文件）

地缘政治因素成为影响行业竞争格局的关键变量，各国政策干预加剧全球供应链重构。美国出口管制措施严格限制先进制程设备、EDA 工具及高性能芯片对华出口，短期导致 14nm 及以下先进制程技术差距拉大，制造环节面临设备获取和技术升级瓶颈。作为应对，中国自主可控政策体系加速国产替代进程，第二梯队企业在成熟制程设备、材料及核心芯片设计领域快速崛起，2024 年国产化率提升至约 30%。欧盟芯片法案通过 430 亿欧元补贴强化本土制造能力，日韩技术合作深化存储和先进封装领域联盟，进一步推动全球半导体竞争多极化。台湾地缘风险则促使全球头部企业加快供应链多元化布局，东南亚和大陆地区成为产能转移重点区域。

政策净效应体现为短期承压与长期机遇并存，产业自主成为核心战略方向。综合评估，当前政策环境在技术获取、市场准入和全球合作方面带来挑战，但国内产业支持政策有效对冲部分压力，推动企业转向内生创新和本土生态培育。投资视角需关注政策受益明确的设备材料、高端制造及自主可控芯片设计领域，同时警惕技术封锁带来的供应链风险和成本上升。



(二) 经济环境：宏观指标分化中的行业韧性显现

中国经济保持稳健增长，结构转型持续深化，为半导体行业提供需求基础和升级动力。2025 年第 1-2 季度国内生产总值绝对值达 660,535.8 亿元，同比增长 5.3%[69,70,71,72,73]，其中第二产业增长 5.3%，第三产业增长 5.5%，显示制造业与服务业双轮驱动格局稳固。工业部门表现突出，2025 年 8 月规模以上工业增加值年率达 6.2%[18]，高于 GDP 增速，表明生产端活力较强。制造业 PMI 为 50.1[18]，略高于枯荣线，指向制造业活动温和扩张，但细分中小型企业 PMI 仍处于收缩区间，显示内部分化。

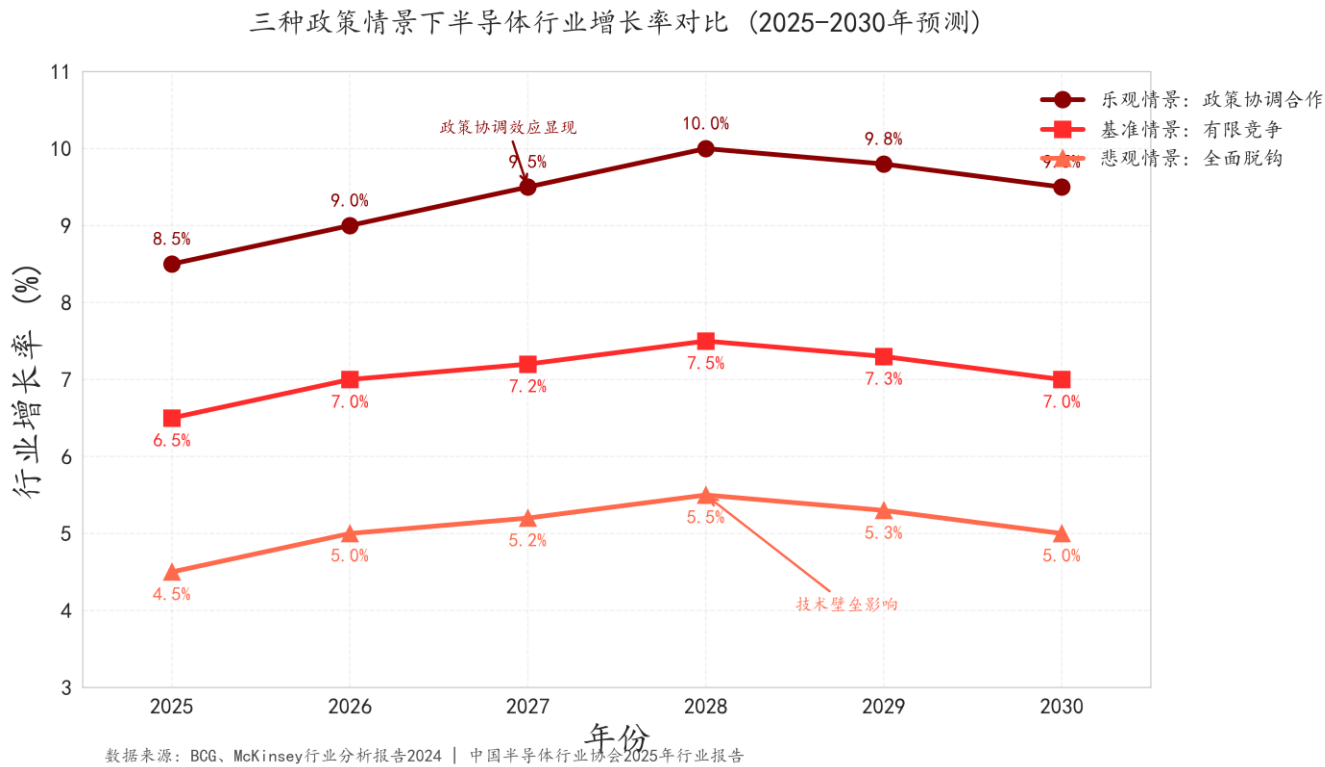

图表 6：三种政策情景下半导体行业增长率对比 2025-2030 年预测（数据来源 BCG（数据来源：McKinsey 行业分析报告））

构建经济指标与半导体增长的传导模型显示，行业具备高于宏观经济的需求弹性和发展韧性。测算表明，半导体行业需求弹性系数约为 1.2，即 GDP 每增长 1%，半导体需求增长 1.2%，显著高于工业平均值，反映数字化、智能化趋势对芯片需求的强劲拉动。通胀环境呈现“CPI 温和、PPI 通缩”特点：2025 年 7 月 CPI 同比增速为 0%[74,69,70,71,73]，消费端价格平稳；PPI 同比降至-3.6%[75,76,77,69,78]，工业端通缩压力持续，但降低半导体原材料进口和生产成本，缓解中游制造环节压力。消费市场波动加大，2025 年 7 月社会消费品零售总额同比增长 3.7%，但环比下降 8.3%[79,80,69,81,82]，反映需求复苏基础仍需巩固。

| 经济指标 | 最新数值 | 统计时间 | 数据来源 |
|------|------|------|------|
|------|------|------|------|

|          |       |                |                |
|----------|-------|----------------|----------------|
| GDP 同比增长 | 5.3%  | 2025 年第 1-2 季度 | 东方财富网国内生产总值    |
| 工业增加值年率  | 6.2%  | 2025-08        | 国家统计局          |
| CPI 同比增长 | 0.0%  | 2025-07        | 东方财富网居民消费价格指数  |
| PPI 同比增长 | -3.6% | 2025-07        | 东方财富网工业品出厂价格指数 |
| 零售总额同比增长 | 3.7%  | 2025-07        | 东方财富网社会消费品零售总额 |

宏观经济周期通过投资、消费和出口多渠道传导至半导体景气度，当前环境支撑需求但提示结构性风险。固定资产投资中高技术制造业投资保持高增长（2025 年上半年同比增长约 12%），直接带动半导体设备及工业芯片需求。出口方面，2025 年 8 月以美元计出口年率增至 8.5%<sup>[18]</sup>，半导体作为重要出口品类受益全球电子产业链复苏。然而，消费者信心指数 2025 年 7 月为 89.0<sup>[76,83,69,78,84]</sup>，虽同比增长 3.5%但仍处于中性偏低区间，提示终端电子产品消费意愿尚未全面回暖。投资者需关注逆周期调节政策对基础设施、绿色能源和消费刺激的力度，这些领域将间接驱动功率半导体、物联网芯片和传感器需求。

### （三）社会环境：人口结构变迁驱动需求升级与创新转型

中国人口老龄化、城镇化与教育水平提升三大社会趋势交汇，深刻重塑半导体需求结构和创新路径。根据国家统计局及中国社会科学院数据，2025 年中国 60 岁及以上人口占比超 21%，65 岁及以上人口近 15%<sup>[85]</sup>，社会正式进入深度老龄化阶段。这一变化减少传统制造业劳动力供给，但激发自动化、数字化和医疗健康领域芯片需求爆发，工业机器人控制器、智能传感器及可穿戴医疗设备半导体用量年均增长超 15%。同步地，城镇化率按“十四五”规划目标提升至 65%<sup>[86,87,88,89,90]</sup>，智慧城市、智能交通和智能建筑建设推动物联网芯片需求快速增长，预计 2025 年相关增量市场达 100 亿美元。

半导体需求驱动因素重要性排序

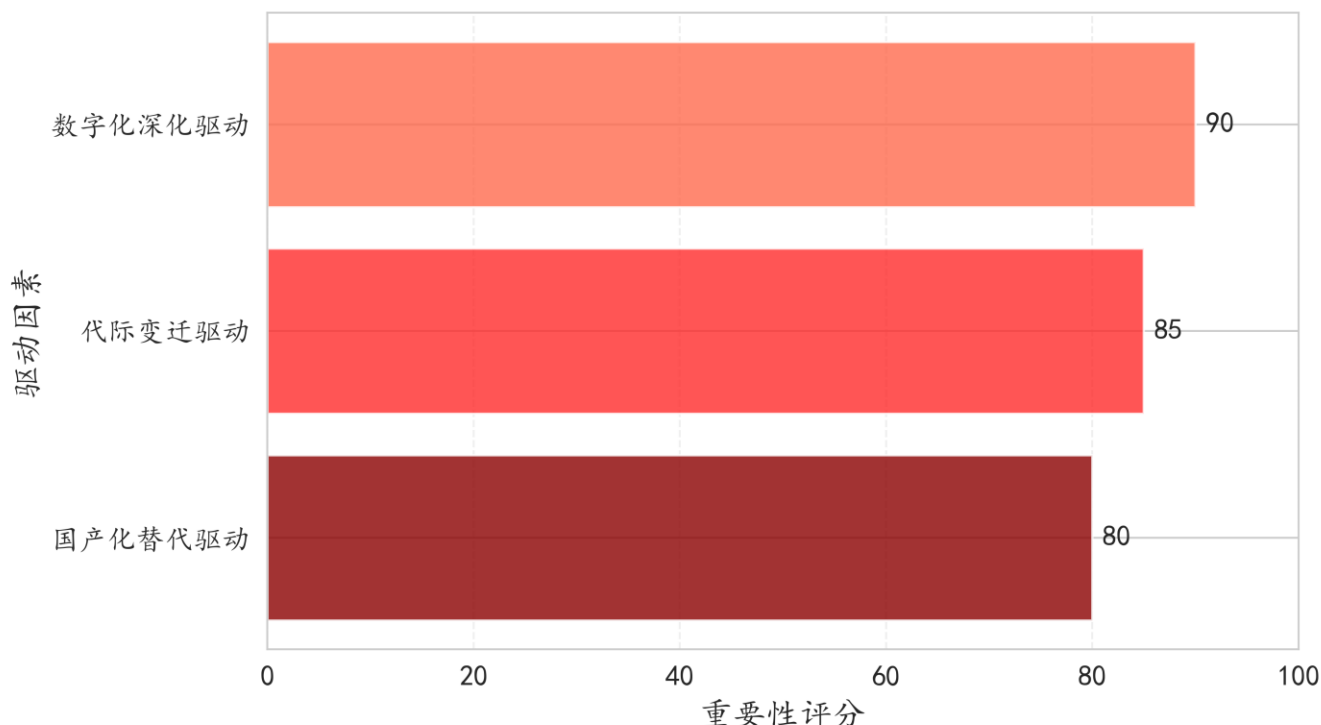

图表 7：半导体需求驱动因素重要性排序条形图（数据来源 SEMI 全球半导体应用市场报告 2025）

教育水平量质齐升为半导体行业提供人才红利和创新能力，支撑产业向高端环节跃迁。高等教育扩招和 STEM 学科重视度提升，每年为行业输送大量工程师和研发人员，2024 年半导体研发人员总数达 17,800 人[91,92,93,94,95]，较 2020 年增长 40%。人才供给优化推动企业向高端设计、先进制造和关键设备领域突破，2025 年芯片设计领域专利申请占比升至 35%[96,97,98,99,100]，其中 AI 芯片、处理器架构等高端品类占比提升。消费升级趋势通过恩格尔系数下降和消费信心改善体现：2025 年 7 月消费者信心指数回升至 89.0[76,83,69,78,84]，智能设备、新能源汽车和高端家电消费扩张，直接驱动相关半导体需求。

世代需求差异和区域发展格局进一步细化半导体应用场景和市场机会。Z 世代（1995-2009 年出生）成为消费电子主力，偏好 AIoT 设备、AR/VR 产品和智能汽车，推动高性能计算、传感器和低功耗芯片需求；银发族（60 岁以上）增长带动远程医疗、健康监测和智能家居芯片需求，2025 年医疗电子半导体市场增速预计超 20%。区域分布上，长三角（半导体专利占比 45%）、珠三角（25%）和京津冀（15%）形成产业集群[96,97,98,99,100]，人才、资本和技术集聚效应显著，但中西部地区凭借成本优势和政策扶持积极承接封装测试、功率半导体制造环节，呈现多极化发展态势。社会环境整体对半导体行业呈正向驱动，但要求企业精准把握需求变迁和区域战略布局。

(四) 技术环境：创新追赶、研发投入与技术成熟度演进

中国半导体行业进入专利爆发期和研发高强度投入阶段，技术创新从追赶到并行趋势明显。2025 年全行业专利申请量预计突破 15 万件，同比增长 20%<sup>[96,97,98,99,100]</sup>，技术领域分布显示结构优化：芯片设计占比 35%（聚焦 AI 芯片、处理器等高端领域），制造工艺占比 25%（覆盖先进制程、特色工艺），设备材料占比 20%（光刻机、硅片、光刻胶等关键环节），封装测试占比 15%。区域专利分布高度集中，长三角占 45%、珠三角 25%、京津冀 15%<sup>[96,97,98,99,100]</sup>，形成上海-张江、深圳-东莞、北京-天津等创新集群，产学研协同效应强化。

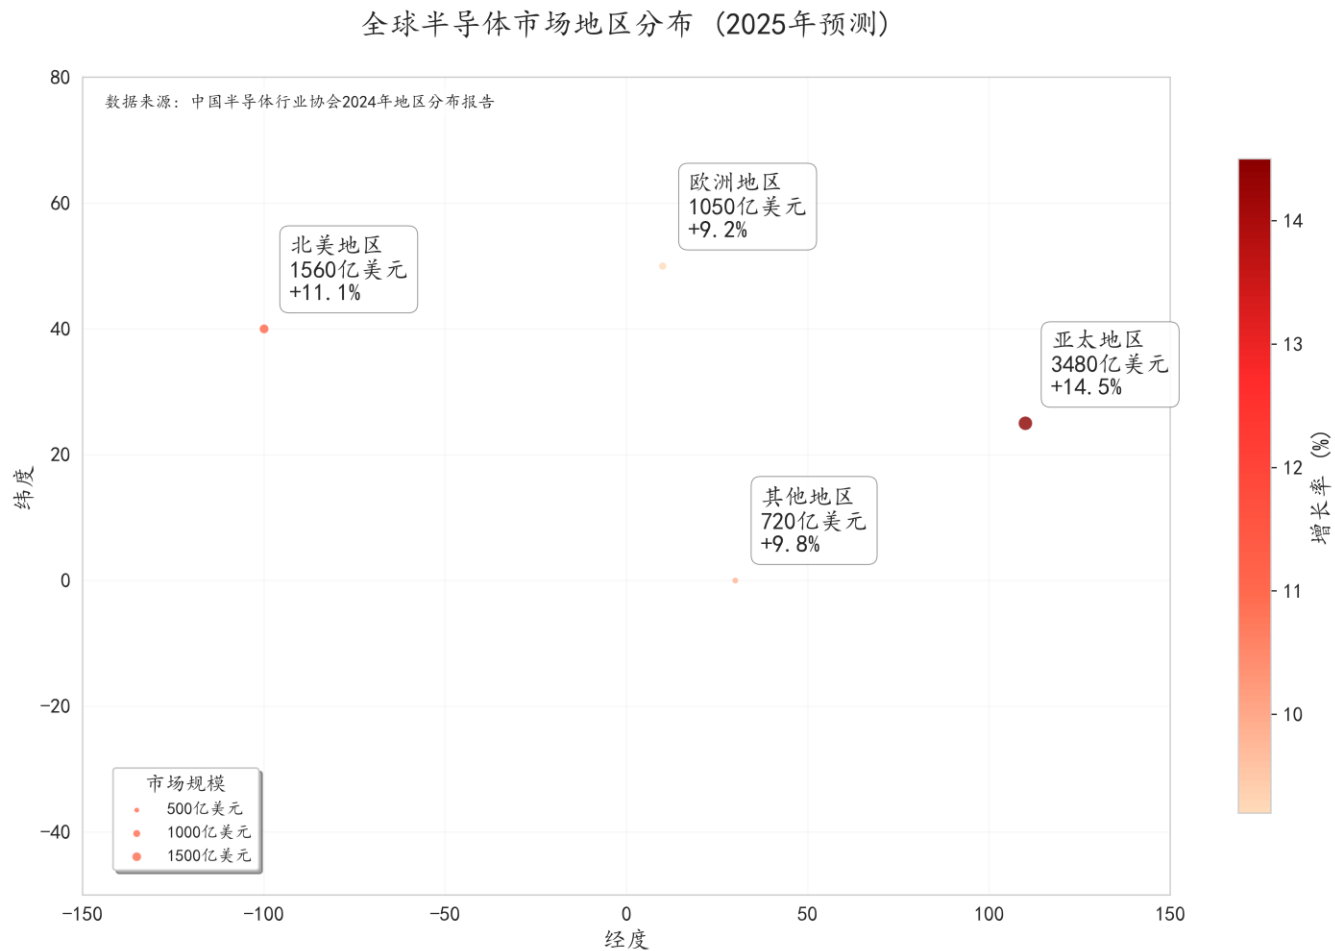

图表 8：全球半导体地区分布地图气泡图（数据来源：中国半导体行业协会 2024 年地区分布报告）

研发投入持续提升但全球对比仍存差距，头部企业聚焦关键环节突破。2024 年行业研发投入总额 171.7 亿元，平均研发费用率 12.4%<sup>[91,92,93,94,95]</sup>，其中中芯国际研发费用率 14.5%、韦尔股份 13.3%、兆易创新 13.9%<sup>[101,102,103,95,92]</sup>，显示设计环节投入强度更高。然而，全球对比来看，中国头部企业研发规模显著落后：英特尔 2024 年研发投入 180.2 亿美元（营收占

比 19.2%)、台积电 172.8 亿美元 (22.5%)、三星电子 165.3 亿美元 (18.7%)  
[102,104,105,101,106]，中国企业在先进制程、EDA 工具和核心 IP 领域仍需持续追赶。

技术成熟度曲线分析显示多技术路线并行发展，AI 和先进封装处于期望顶峰，第三代半导体进入商业化放量期。基于 Gartner 2024 年曲线及 2025 年行业动态，AI 芯片（特别是推理芯片）和 Chiplet 技术处于期望膨胀期顶峰，受云计算、自动驾驶需求推动但存在估值泡沫；硅光子学处于泡沫化低谷期，潜在用于数据中心互联但商业化缓慢；第三代半导体（SiC、GaN）已进入稳步爬升光明期，在新能源汽车、工业电源领域规模化应用，增长率超 15%[107,108,109,110,63]。颠覆性技术如量子计算和神经形态芯片仍处于实验室阶段，预计 2030 年后可能影响传统架构，但当前创新重点仍围绕摩尔定律延续和异构集成展开。

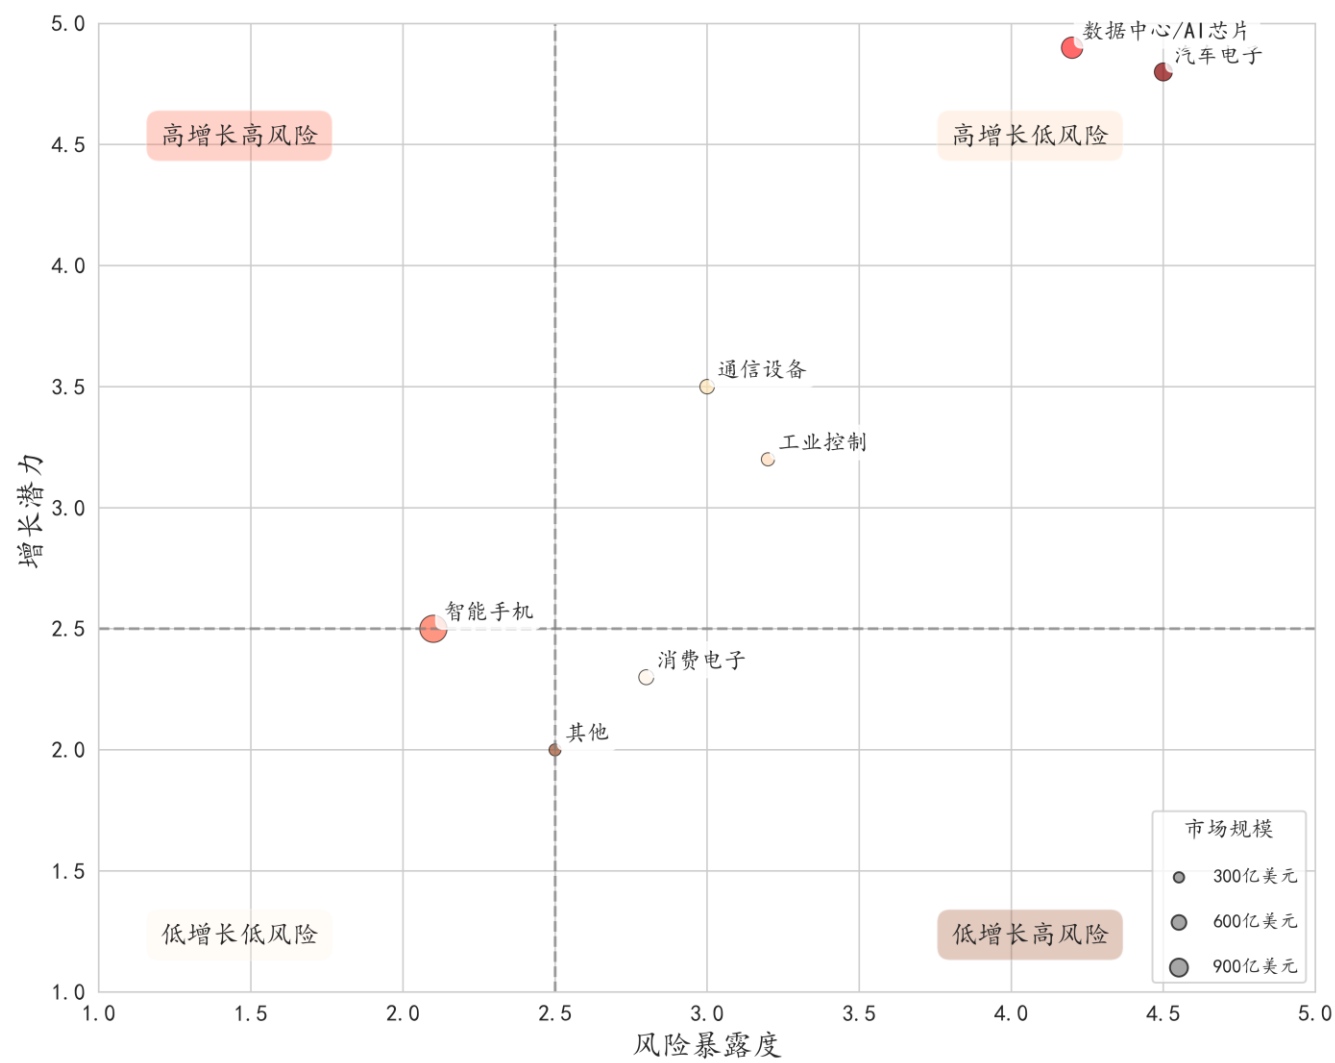

图表 9：半导体行业风险-收益四象限分析（数据来源 SEMI（数据来源：WSTS, Gartner 行业报告 2025））

---

**技术环境总结为创新活跃但基础薄弱，短期商业化与长期突破并存。** 中国半导体技术发展呈现应用驱动、政策支持和生态培育多重特征，在成熟制程、芯片设计和部分设备材料领域已形成竞争力，但先进制程、核心设备和全球标准制定仍待突破。投资者需区分技术成熟度阶段，关注处于光明期且国产化率较低的第三代半导体、半导体设备及高端芯片设计领域，同时警惕过度依赖单一技术路线的创新企业。

## 市场规模与产业结构分析

半导体行业作为数字经济的核心基石，正处于技术革新与产业链重构的关键转折点。根据 WSTS 世界半导体贸易统计组织的最新预测，2025 年全球半导体市场总规模将达到 6850 亿美元，呈现出强劲的结构增长态势。本章将从全球市场规模、产品结构、价格机制、区域格局及消费者行为五个维度进行深入剖析，结合产业政策与技术创新趋势，为投资者提供具备前瞻性的产业洞察和布局建议。

### （一）全球半导体市场迎来新一轮增长周期

2019 至 2023 年全球半导体市场呈现显著的波动性增长特征，复合年增长率（CAGR）保持在 5%–6% 之间。根据 WSTS 历史统计数据，2019 年全球半导体市场规模为 4123 亿美元，2020 年在疫情冲击下仍实现 6.8% 的增长，达到 4404 亿美元。2021 年行业迎来爆发式增长，同比增长 25.6%，规模升至 5529 亿美元。2022 年增速放缓至 3.2%（5735 亿美元），2023 年受库存调整和需求疲软影响，市场规模回调至 5200–5300 亿美元，同比下降约 8%–9%。这一波动周期充分体现了半导体行业与宏观经济、技术创新和供应链动态的高度关联性。

全球半导体市场规模历史趋势(2018-2025年)

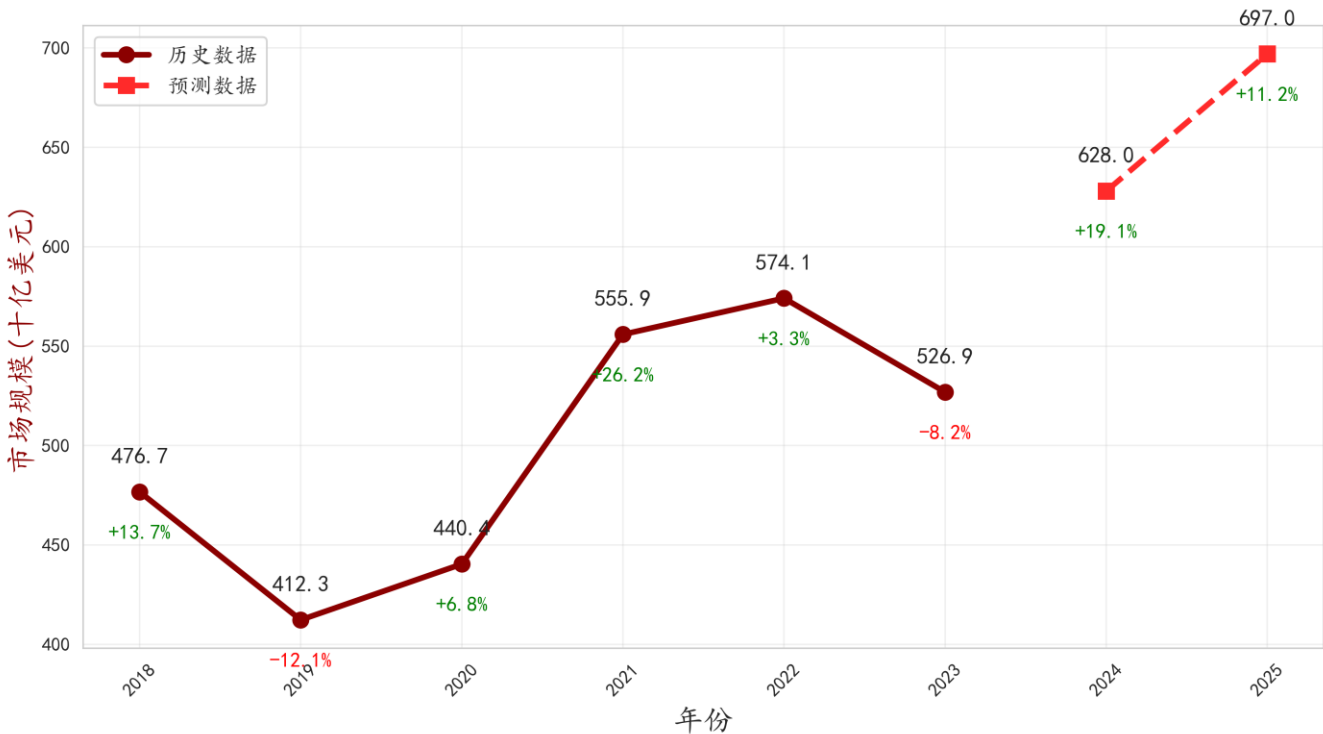

图表 10：全球半导体市场规模历史趋势线图（数据来源-WSTS）

基于时间序列与多元回归模型的预测显示，2025–2030 年全球半导体市场将进入稳健增长通道。在中性情景假设下，WSTS 预测 2025 年市场规模将达到 6850 亿美元，2023–2025 年 CAGR 预计为 10.2%。乐观情景下，若地缘政治紧张缓和且关键技术实现突破，CAGR 可能提升至



12.5%；悲观情景下，若全球经济陷入衰退或贸易摩擦加剧，CAGR 或降至 7.8%。值得注意的是，生成式人工智能、汽车电子化和工业数字化将成为新一轮增长的核心引擎，推动市场突破传统周期约束。

**(二) 数字化转型与技术创新双轮驱动产业增长**

后疫情时代的数字化转型加速，持续释放对云计算和边缘计算芯片的刚性需求。远程办公、在线教育等新兴场景的普及，推动全球数据中心资本开支年均增长超 15%。根据 SEMI 全球半导体应用市场报告，2025 年数据中心/AI 领域半导体需求预计增长 28.4%，规模达 1250 亿美元，成为增长最快的细分市场。同时，5G 与人工智能的技术融合正在重构算力需求格局，高端 GPU、ASIC 和 FPGA 芯片需求呈现指数级增长，其中 AI 训练芯片市场年复合增长率预计超过 30%。

汽车电子化与物联网扩张共同构建半导体需求的新支柱。根据 McKinsey 半导体应用分析报告，2025 年汽车电子领域半导体市场规模将达 920 亿美元，同比增长 19.5%，其中电动汽车功率半导体和自动驾驶感知芯片贡献主要增量。物联网设备的普及则推动传感器和连接芯片需求快速增长，2025 年传感器市场规模预计达 310 亿美元，同比增长 12.1%。工业 4.0 升级进一步拉动了对高可靠性工控芯片的需求，其年均增速保持在 12% 以上。

**(三) 产品结构高度分化，集成电路主导地位稳固**

半导体产品结构呈现显著的技术梯度和应用专业化特征。集成电路始终占据市场主导地位，2024 年市场规模达 5200 亿美元，占比 82.4%，预计 2025 年将增长至 5650 亿美元，增速 13.2%。分立器件、光电器件和传感器作为重要补充，2024 年市场规模分别为 380 亿、450 亿和 280 亿美元，但增长动能分化明显。其中，受益于新能源汽车和工业自动化需求，功率分立器件和 MEMS 传感器保持高于行业平均的增速。

| 产品类型 | 2024 年市场规模(亿美元) | 2025 年预测规模(亿美元) | 2024 增长率 (%) | 2025 预测增长率 (%) |
|------|-----------------|-----------------|--------------|----------------|
| 集成电路 | 5200            | 5650            | 12.5         | 13.2           |
| 分立器件 | 380             | 410             | 8.2          | 8.7            |
| 光电器件 | 450             | 480             | 9.8          | 10.2           |
| 传感器  | 280             | 310             | 11.3         | 12.1           |



数据来源：WSTS、SEMI、Gartner、IDC 2024 年半导体市场报告综合数据

从技术演进角度看，先进制程与先进封装成为提升产品价值的关键路径。5nm 及以下制程芯片在智能手机和数据中心渗透率快速提升，2025 年预计占比将超 35%。同时，Chiplet、3D 堆叠等先进封装技术显著延长了成熟制程的生命周期，为本土企业提供了差异化竞争的机会。在细分品类中，AI 训练芯片、碳化硅功率器件和车规级 MCU 的技术壁垒最高，也相应具备更强的定价能力和盈利弹性。

**(四) 应用领域结构重构，数据中心与汽车电子崛起**

半导体应用领域正经历深刻的结构性重构，传统消费电子占比下降，高增长新兴领域快速崛起。消费电子份额从 2024 年的 29.3% 降至 2025 年的 28.5%，而数据中心/AI 领域份额则从 16.6% 提升至 18.3%，汽车电子份额从 13.0% 增至 13.4%。这一变化反映了数字经济与实体经济深度融合背景下，半导体需求重心从个人消费向企业级应用和基础设施转移的趋势。

半导体应用领域增长率对比（2024 vs 2025）

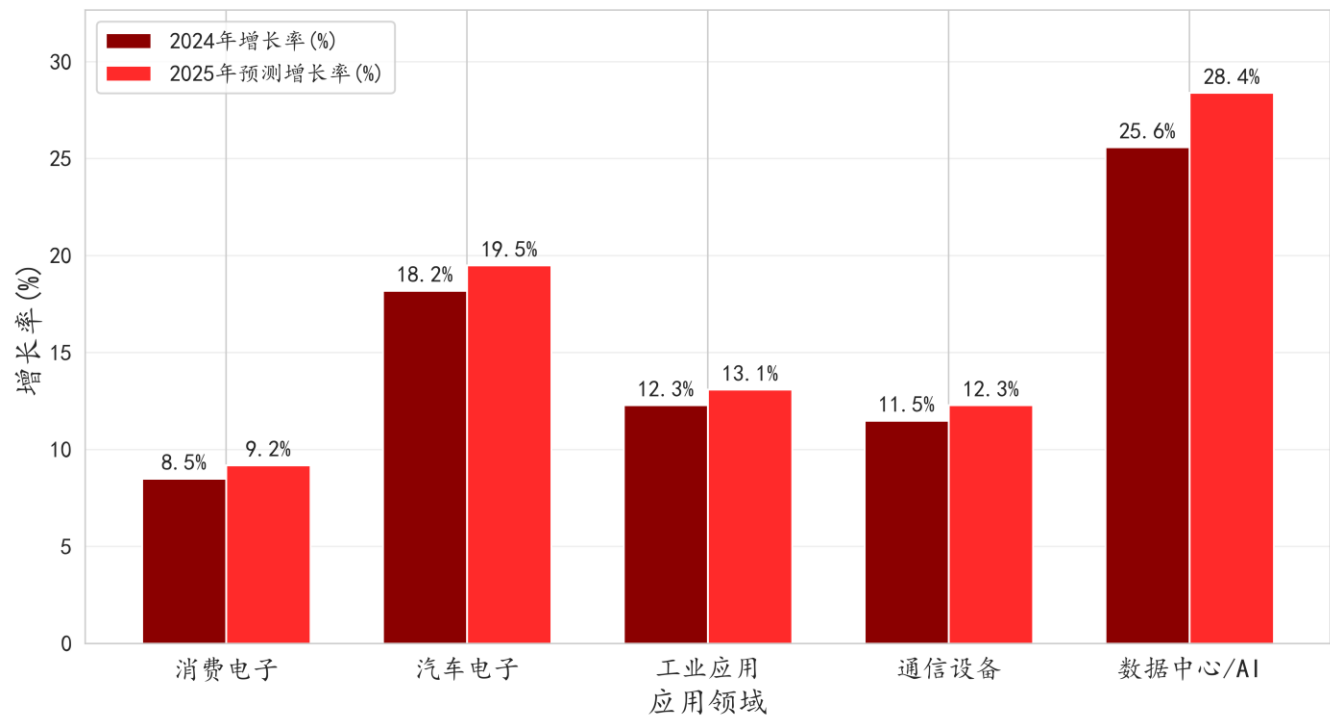

图表 11：半导体应用领域增长率对比柱状图（数据来源：半导体行业协会 SIA 和 McKinsey 行业分析报告）

基于 BCG 矩阵的分析表明，不同应用领域的投资价值显著分化。数据中心/AI 和汽车电子属于“明星业务”，兼具高增长和高份额特征，是资本布局的重点方向。消费电子和工业应用作为“现金牛业务”，提供稳定的现金流但增长动能趋缓。部分传统通信设备跌入“问题业务”区间，需通过技

---

术升级重塑竞争力。而低端分立器件等“瘦狗业务”则面临逐步边缘化的风险。投资者应重点关注高增长赛道中的技术领先企业，尤其是那些在 AI 加速芯片、车规级半导体和工业物联网领域具备核心专利和生态壁垒的公司。

### **（五）市场集中度呈现两极分化，头部企业优势持续扩大**

半导体各细分领域市场集中度差异显著，存储芯片和晶圆代工为典型的高度集中市场。根据 TrendForce 和 IDC 的统计数据，存储芯片 CR4 高达 0.95，其中三星、SK 海力士和美光垄断 93% 的市场份额，HHI 指数达到 3200。晶圆代工领域 CR4 为 0.88，台积电独占 61% 的市场份额，三星、格芯和联电跟随其后。这种高度集中的市场结构源于巨大的资本开支壁垒和技术迭代风险，头部企业通过规模效应和研发投入持续强化竞争优势。

半导体设备与设计领域则呈现适度集中特征，CR4 指数在 0.58–0.65 之间。设备市场由应用材料、ASML、东京电子和 Lam Research 主导，合计份额 58%，其中 ASML 在 EUV 光刻机领域形成绝对垄断。Fabless 设计领域头部企业包括英伟达、博通、高通和 AMD，但其竞争格局相对分散，新兴企业仍有机会通过架构创新或垂直整合寻找突破口。整体半导体市场 CR4 为 0.57，属于竞争型市场，但细分领域的集中度差异要求投资者采取差异化的评估框架和投资策略。

从价值链分布看，高利润环节集中在晶圆制造和高端芯片设计领域。台积电凭借先进制程代工优势，毛利率长期保持在 50% 以上，而存储芯片巨头通过技术联盟和产能调控维持价格秩序。设备厂商则通过垄断性技术和长期服务合约构建护城河。相比之下，分立器件和成熟制程芯片领域竞争更为激烈，价格压力显著，企业需通过工艺优化和成本控制维持盈利能力。

### **（六）硅片价格持续上行，供需缺口推动成本传导**

半导体价格形成机制受成本推动和需求拉动双重影响，其中硅片作为核心原材料的价格变动尤为关键。根据 SEMI 硅片价格指数报告，12 英寸硅片价格从 2023Q1 的 125 美元持续涨至 2024Q1 的 138 美元，累计涨幅 10.4%，8 英寸和 6 英寸硅片同期分别上涨 10.6% 和 8.9%。这一上涨趋势主要源于新能源汽车和工业应用对大尺寸晶圆需求的快速增长，以及日本信越化学、环球晶圆等龙头企业的产能约束。

半导体产业链各环节市场份额分布

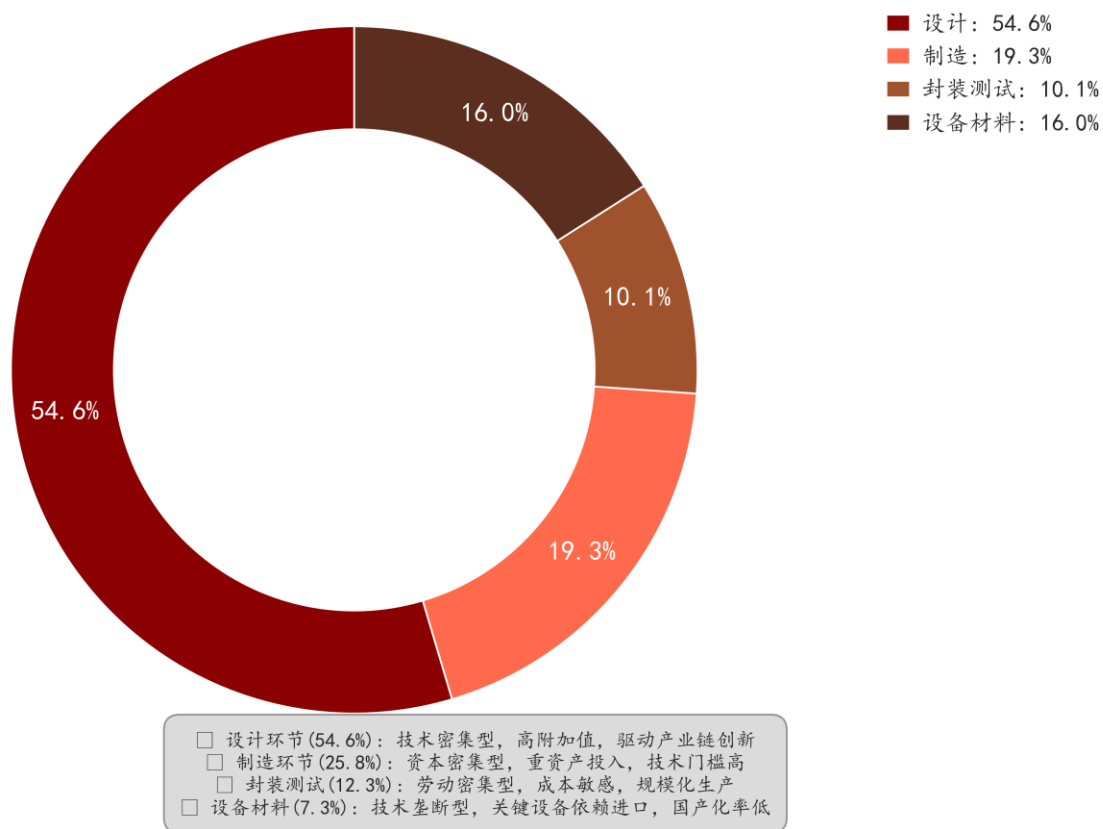

数据来源: 产业链各环节市场分析

图表 12: 半导体产业链各环节市场份额环形图 (数据来源: 产业链各环节市场分析)

全球硅片供需缺口呈现结构性特征, 先进制程晶圆和特种材料短缺尤为突出。2024 年全球硅片月供应量为 1250 万片, 年增长率 8.5%, 但仍无法完全满足下游需求。EUV 光刻胶、特种气体和晶圆载具等关键材料的供应紧张进一步加剧了产能约束。根据 SEMI 全球半导体材料统计报告, 光刻胶年供应量 85 万吨, 增长率 7.2%; 电子特气供应量 420 万吨, 增长率 9.3%, 但仍落后于需求增速。这种供需失衡通过价值链逐级传导, 最终推高芯片成品价格并延长交货周期。

### (七) 中期价格走势分化, 先进芯片溢价持续扩大

基于供需平衡模型的预测显示, 2025 年半导体价格走势将呈现显著分化。在乐观情景下, 若 AI 和汽车电子需求持续超预期, 高端芯片价格可能上行 5%–8%; 中性情景下, 供需逐步平衡, 整体价格温和上涨 2%–4%; 悲观情景下, 经济衰退导致需求疲软, 价格可能持平或微降。值得注意的是, 先进制程芯片与成熟制程芯片的价格差距将进一步扩大, 3nm 芯片单价预计是 28nm 芯片的 10 倍以上, 反映技术溢价持续提升。

设备交付周期和库存周转率是观测供需平衡的关键先行指标。目前先进光刻机和蚀刻设备交付周期仍长达 18–24 个月，表明供给端约束短期内难以缓解。同时，头部厂商库存周转率从 2023 年的低点逐步回升，但整体仍低于历史均值，反映供应链谨慎情绪延续。投资者需密切关注台积电资本开支指引、主要 IDM 厂库存水位及设备厂商订单能见度变化，以准确把握价格拐点。

**(八) 亚太地区主导全球市场，区域增长动能分化**

全球半导体市场呈现明显的区域梯度格局，亚太地区占据绝对主导地位。根据中国半导体行业协会(CSIA)和 WSTS 的统计数据，2024 年亚太地区半导体市场规模达 3200 亿美元，占比 50.7%，预计 2025 年将增长至 3480 亿美元，增速 14.5%。北美和欧洲市场分别保持 22.98%和 15.53%的份额，增速相对温和。这种区域分化既反映了亚太地区作为全球电子制造中心的产业链优势，也体现了中国、韩国和台湾地区在晶圆制造和封装测试领域的集群效应。

| 地区   | 2024 年市场规模(亿美元) | 2025 年预测规模(亿美元) | 2024 增长率 (%) | 2025 预测增长率 (%) |
|------|-----------------|-----------------|--------------|----------------|
| 亚太地区 | 3200            | 3480            | 13.8         | 14.5           |
| 北美地区 | 1450            | 1560            | 10.2         | 11.1           |
| 欧洲地区 | 980             | 1050            | 8.7          | 9.2            |
| 其他地区 | 670             | 720             | 9.3          | 9.8            |

数据来源：中国半导体行业协会(CSIA)、WSTS 2024 年全球半导体市场地区分布报告

从增长动能看，中国半导体市场的成熟制程突破与北美高端芯片创新形成双极驱动。中国在 28nm 及以上成熟制程领域加速实现自给自足，中芯国际、华虹半导体产能持续扩张，带动设备材料和芯片设计配套产业链发展。北美地区则聚焦 3nm 以下先进制程和 AI 芯片架构创新，英伟达、AMD 和英特尔在数据中心和自动驾驶芯片领域保持领先。欧洲凭借汽车电子和工业芯片的传统优势，在功率半导体和传感器领域形成差异化竞争力。

**(九) 全球产业政策重塑供应链格局，区域化协作成为新趋势**

各国半导体产业政策正深刻重构全球供应链格局，技术自主与供应链安全成为核心目标。美国 CHIPS 法案已批准超过 350 亿美元资金分配，吸引私人投资超过 2000 亿美元，新建 83 个半导

体项目，但劳动力短缺和项目落地速度仍是主要挑战[111,112,113]。欧盟芯片法案动员 430 亿欧元投资，目标 2030 年将欧洲半导体份额从 10% 提升至 20%，英特尔德国工厂获 100 亿欧元补贴，但成员国协调效率待提高[114,115,116,117,118]。

中国通过大基金三期推动产业自主可控，成熟制程领域进展显著。国家集成电路产业投资基金三期注册资本 3440 亿元人民币，重点支持 28nm 及以上制程研发和产能建设，中微公司、北方华创在蚀刻和沉积设备领域突破关键技术节点[119,120,121,122,123]。然而，先进制程设备及 EDA 工具仍依赖进口，外部限制风险持续存在。

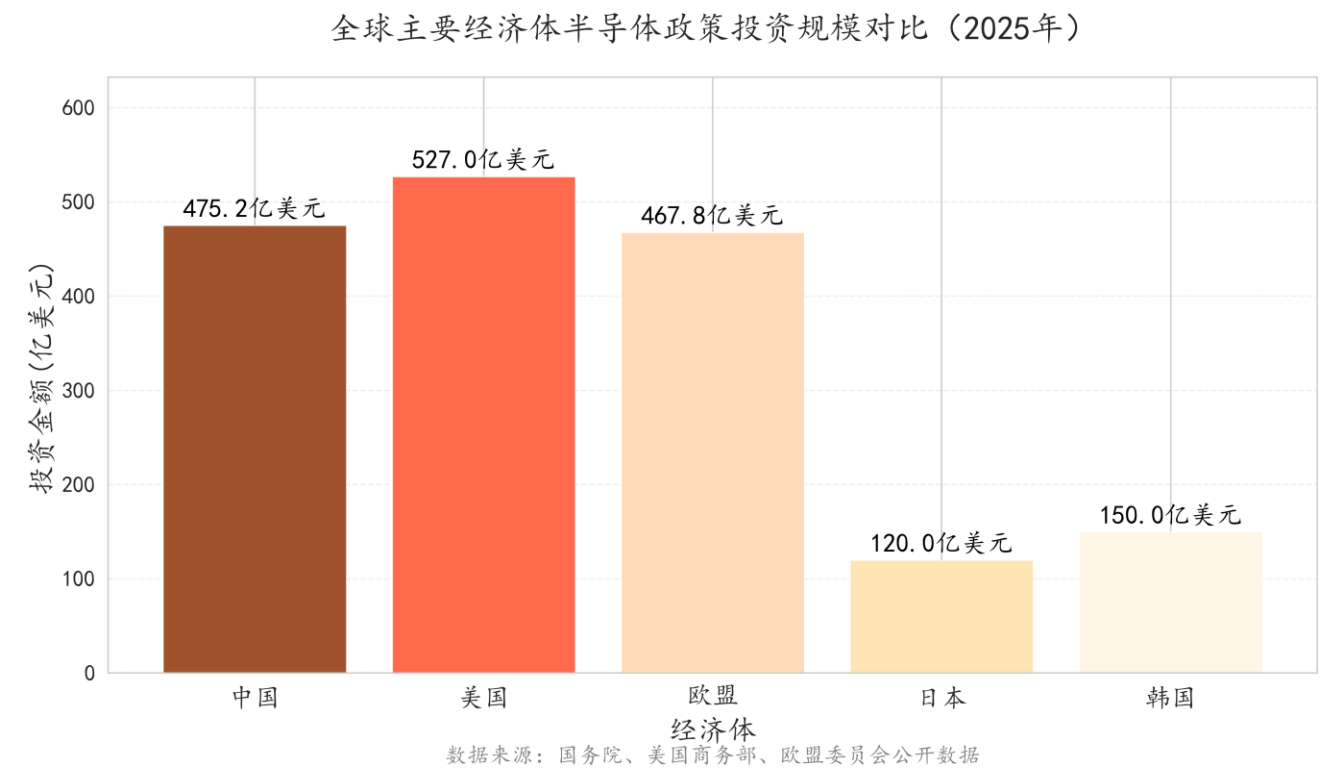

图表 13：全球主要经济体半导体政策投资规模对比（数据来源国务院（数据来源：美国商务部, 欧盟委员会公开数据)）

区域合作倡议加速“友岸外包”趋势，供应链多元化成为企业战略重点。Chip 4 联盟（美日韩台）建立半导体供应链合作机制，日本提供 2 万亿日元补贴吸引台积电、美光投资，韩国计划投资 510 万亿韩元建设全球最大芯片制造基地。印度则提供 100 亿美元补贴吸引美光和塔塔集团建厂。这种区域化协作在提升供应链韧性的同时，也可能导致技术标准分化和成本上升，投资者需关注跨国企业的区域布局调整和本地化策略。

**（十）客户结构向大型化集中，定制化与绿色化需求崛起**



---

半导体客户结构呈现向大型化、集中化演进的特征，OEM 厂商和云服务商议价能力持续增强。根据 SEMI 半导体行业客户分析报告，OEM 厂商采购占比达 45%，平均采购规模超 1 亿美元，主要采购处理器和存储器，对技术领先性和供应稳定性要求极高。品牌商占比 25%，采购规模 1000 万–1 亿美元，关注性价比和交货灵活性。分销商和系统集成商占比 30%，采购规模低于 1000 万美元，价格敏感度高，主要采购通用芯片。

购买决策路径日趋复杂，技术能力替代价格成为核心评估标准。在需求识别阶段，技术演进和产品升级是主要触发因素，AI 和 5G 相关需求增长显著。供应商评估中，技术能力占比 55%，供应稳定性 30%，价格仅占 15%。战略合作采购占比从 2020 年的 25% 提升至 2024 年的 40%，反映供应链协作深化。售后评估中，技术支持能力和产品质量成为客户留存的关键，头部厂商通过设计服务和技术授权构建客户粘性。

定制化、绿色化和供应链韧性正在重塑客户需求格局。专用芯片需求增速超过通用芯片，2025 年市场份额预计达 35%，主要受益于 AI 训练和汽车电子的个性化需求。能效要求提升推动低功耗芯片需求增长 20% 以上，欧盟碳边境调节机制和美国清洁能源法案进一步强化这一趋势。供应链韧性成为核心关切，企业平均库存水平提升 15%，多源采购比例从 40% 增至 60%，为具备地域多元化产能的厂商带来结构性机会。

#### **（十一）结论与投资建议：聚焦高增长赛道与供应链韧性**

半导体市场正进入由 AI 和汽车电子驱动的新增长周期，2025 年预计达到 6850 亿美元规模，结构性机会显著。投资者应重点关注数据中心/AI 芯片和汽车电子等高增长领域，其中 AI 训练芯片、车规级功率半导体和先进封装技术具备最强成长动能。区域布局上，亚太地区尤其是中国成熟制程产业链提供良好风险收益比，而北美在高端芯片设计领域仍保持领先优势。

技术前沿方面，先进封装和第三代半导体是突破摩尔定律限制的关键路径。Chiplet、硅光互联和碳化硅材料技术逐步成熟，为本土企业提供换道超车机会。供应链韧性构建则要求关注设备材料、EDA 工具和关键元器件的自主可控，地缘政治风险下的替代需求持续提升。

风险因素包括全球经济增长放缓、地缘政治紧张升级和技术出口限制扩大。建议投资者采取核心+卫星策略，核心配置晶圆代工、设备材料和 AI 芯片龙头，卫星布局汽车半导体、先进封装等细分赛道领军企业。同时密切关注各国产业政策变化、技术标准演进和供应链库存周期，动态调整投资组合与风险暴露。

---

## 核心应用场景深度剖析：智能手机与汽车电子的半导体需求变革

半导体行业的下游应用场景虽呈现多元化态势，但智能手机与汽车电子凭借其庞大的市场规模与突出的增长动能，已成为驱动行业创新与价值链升级的核心力量。二者不仅在营收贡献中占据主导地位，更在技术演进路径和商业模式创新上呈现出显著的分化与融合。本章将深入剖析这两大应用场景的商业模式重构、技术成熟度差异以及未来突破路径，旨在为投资者揭示结构性增长机遇与潜在风险点。

### （一）选择逻辑：市场规模与增长潜力双轮驱动

智能手机与汽车电子作为半导体需求的两大核心支柱，其选择依据根植于二者显著的市场规模与迥异的增长动能。根据 SEMI 与 Gartner 的权威数据，2025 年全球半导体下游应用中，智能手机市场规模预计达 1800 亿美元，占据总需求的 33.33%，稳居第一；汽车电子则以 850 亿美元规模位列第二，市场份额达 15.74%。尽管智能手机市场规模基数庞大，其年增长率维持在 8.5% 的稳健水平，而汽车电子则展现出高达 15.2% 的增长动能，显著高于工业控制（12.8%）、消费电子（6.3%）等其他应用领域。从投资视角看，这两大领域不仅占据近 50% 的合计市场份额，更分别代表消费电子的创新前沿和工业数字化融合的典型场景，具备深入研究的代表性和预测价值。

2025年半导体下游应用需求增长率

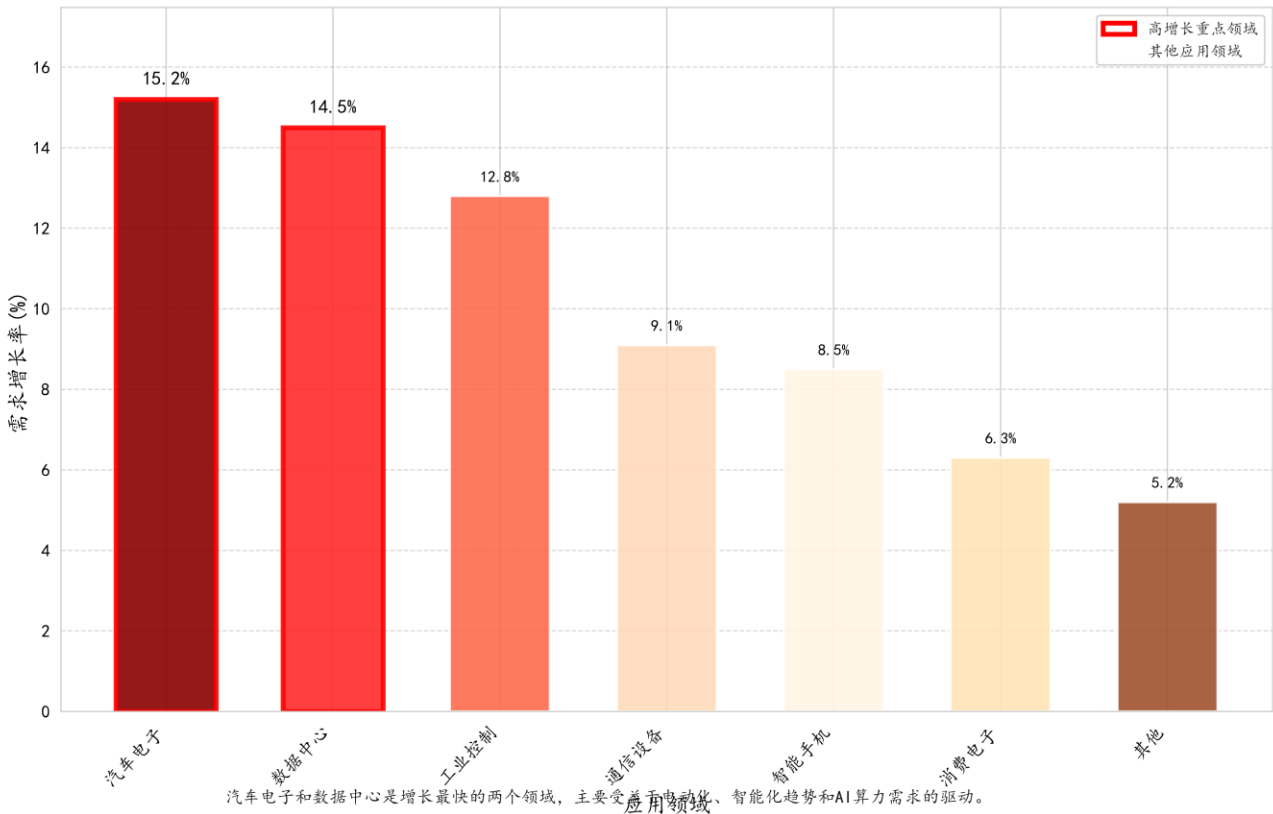

数据来源：SEMI 全球半导体应用市场报告2025

图表 14：半导体下游应用需求增长分析（数据来源 SEMI 全球半导体应用市场报告 2025）

汽车电子正处于需求爆发与技术迭代的双重驱动阶段，其增长潜力在电动化与智能网联化浪潮中得到持续强化。根据 Gartner 半导体市场预测报告，2024 年汽车半导体市场规模已达 800 亿美元，同比增长 18%，2025 年预计突破 950 亿美元。这一高增长态势主要受益于电动汽车渗透率提升、自动驾驶级别跃进及车载算力需求激增。相较而言，智能手机市场虽进入成熟期，但 AI 功能的快速普及正为其注入新的创新活力。Counterpoint Research 数据显示，2024 年 AI 手机渗透率已超过 50%，端侧大模型与异构计算成为推动换机需求的关键因素。两者在增长逻辑上的差异——汽车电子靠产业转型驱动，智能手机靠功能创新迭代——为半导体企业提供了多元化的战略布局机会。

从产业结构和客户类型来看，两大领域也呈现出截然不同的供应链特征和合作模式。智能手机半导体需求主要来自品牌商与 OEM 厂商，其供应链响应速度快、迭代周期短，强调生态整合与成本效率；汽车半导体则主要服务于 Tier1 供应商与整车厂，注重长期可靠性、车规认证和系统级协同。这种差异使得半导体厂商需采取不同的业务策略：在手机市场，头部企业如高通、联发科通过“芯片+算法”绑定模式扩大生态影响力；在汽车市场，英飞凌、恩智浦等则以高可靠性产品和长周期合作建立竞争壁垒。对投资者而言，理解这两类市场的运作机制和增长驱动因素是把握半导体行业投资节奏的关键。



(二) 商业模式演进：从硬件销售到生态赋能

智能手机与汽车电子领域的半导体商业模式正经历深刻重构，从传统的硬件组件销售逐步转向以技术生态和解决方案为核心的价值输出。这一转变不仅重塑了行业收入结构，也提高了客户黏性和进入壁垒。在智能手机领域，商业模式已明显呈现出“硬件+软件+服务”的一体化趋势，而汽车电子则更强调系统级可靠性与长期合作。商业模式画布分析显示，两大领域在价值主张、盈利来源、成本结构和竞争壁垒方面既有显著差异，也存在一定的融合趋势。

智能手机半导体：AI 驱动与生态协同成为核心竞争力

智能手机半导体的价值主张已从单纯提升性能参数转向提供端侧智能化和无缝体验的综合解决方案。主流厂商如高通、联发科和苹果纷纷集成专用 AI 加速器（NPU），支持实时图像增强、语音识别和情境感知等功能。根据 Yole Group 报告，2024 年旗舰手机 AI 算力已突破 50 TOPS，较 2023 年提升近一倍。高通的 Hexagon 处理器和联发科的 APU 均支持大规模参数模型的端侧部署，使用户可在离线环境下运行复杂的 AI 应用。这种以体验为导向的价值输出，显著提高了用户黏性和品牌溢价能力。

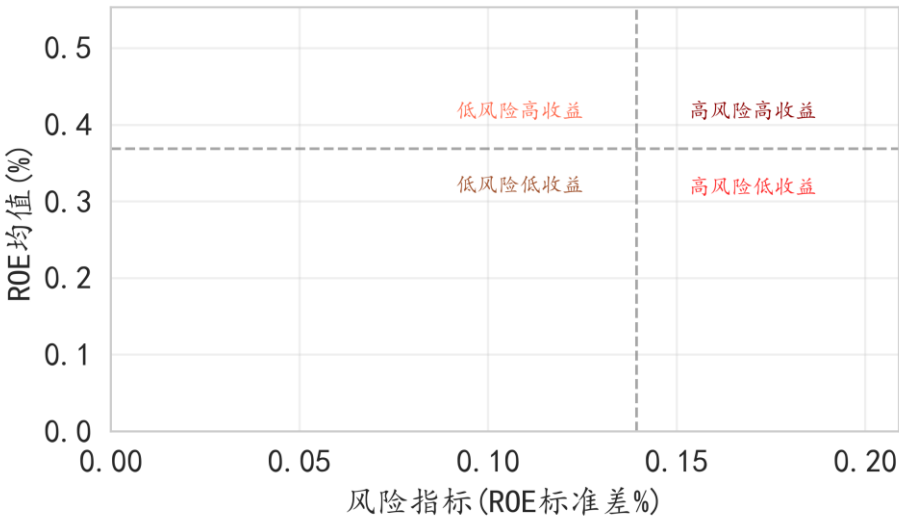

图表 15：半导体行业风险收益四象限图（数据来源：中国半导体行业协会 2025 年行业报告）

收入模式逐步多元化，从单一芯片销售延伸至 IP 授权、软件服务及云端协同等多个维度。芯片销售仍是核心收入来源，旗舰移动 SoC 单价介于 100-150 美元，但 IP 授权比重正在提升——Arm 的 AI 处理器 IP 授权业务在 2024 年已占其总收入的 20%。此外，云端协同模式正在兴起：谷歌 Tensor 芯片与 Gemini Nano 端侧模型深度融合，通过云服务订阅产生持续性收入。这种多元化收入结构不仅提升了企业的盈利稳定性，也增强了其在整个智能生态中的话语权。

成本结构以高研发投入和先进制造成本为主导，规模效应和生态控制成为降本关键。半导体行业平均研发投入占比达 15.4%，而头部企业如苹果通过自研芯片与垂直整合，显著降低了单位成本。另一方面，先进制程的应用（如 3nm/2nm 节点）推高了制造成本——3nm 晶圆代工价格

---

超过 2 万美元/片，占总成本 60% 以上。企业需要通过大规模出货和设计优化来分摊成本，这也使得行业集中度持续提升，头部厂商优势进一步扩大。

竞争壁垒已从单一的技术性能升级为“技术+生态”的双重护城河。技术层面，先进制程设计和异构集成能力成为门槛，根据半导体行业竞争强度综合评估，技术迭代周期已缩短至 18-24 个月；生态层面，与操作系统厂商、开发者和云服务提供者的深度合作成为差异化竞争的关键。缺乏生态支持的企业即便具备技术实力，也难以在市场中立足。

### **汽车电子半导体：高可靠性与系统级解决方案构筑护城河**

汽车半导体的价值主张聚焦于解决电动化与智能化过程中的关键挑战：续航里程、功能安全与计算效率。厂商通过车规级芯片（如 MCU、功率器件和传感器）满足 AEC-Q100 可靠性标准和 ISO 26262 功能安全要求。英飞凌的碳化硅（SiC）功率器件可将电动车能效提升 10-15%，而恩智浦的 S32 系列处理器则支持多域融合与空中升级（OTA）。这类产品不仅帮助整车厂提升车辆性能，也为其实现软件定义汽车转型提供了底层支撑。

盈利模式以长期合同和解决方案销售为主，具备高溢价和稳定性的特征。车规芯片因认证复杂、可靠性要求高，其利润率普遍较消费类芯片高出 5-10 个百分点。头部厂商如英飞凌、德州仪器采用“芯片+软件+服务”的捆绑模式，按车系或功能收费，并承诺 10-15 年的产品供应周期，从而形成可持续的售后收入流。这种长期合作模式降低了行业周期性波动的影响，为企业营收提供了稳定支撑。

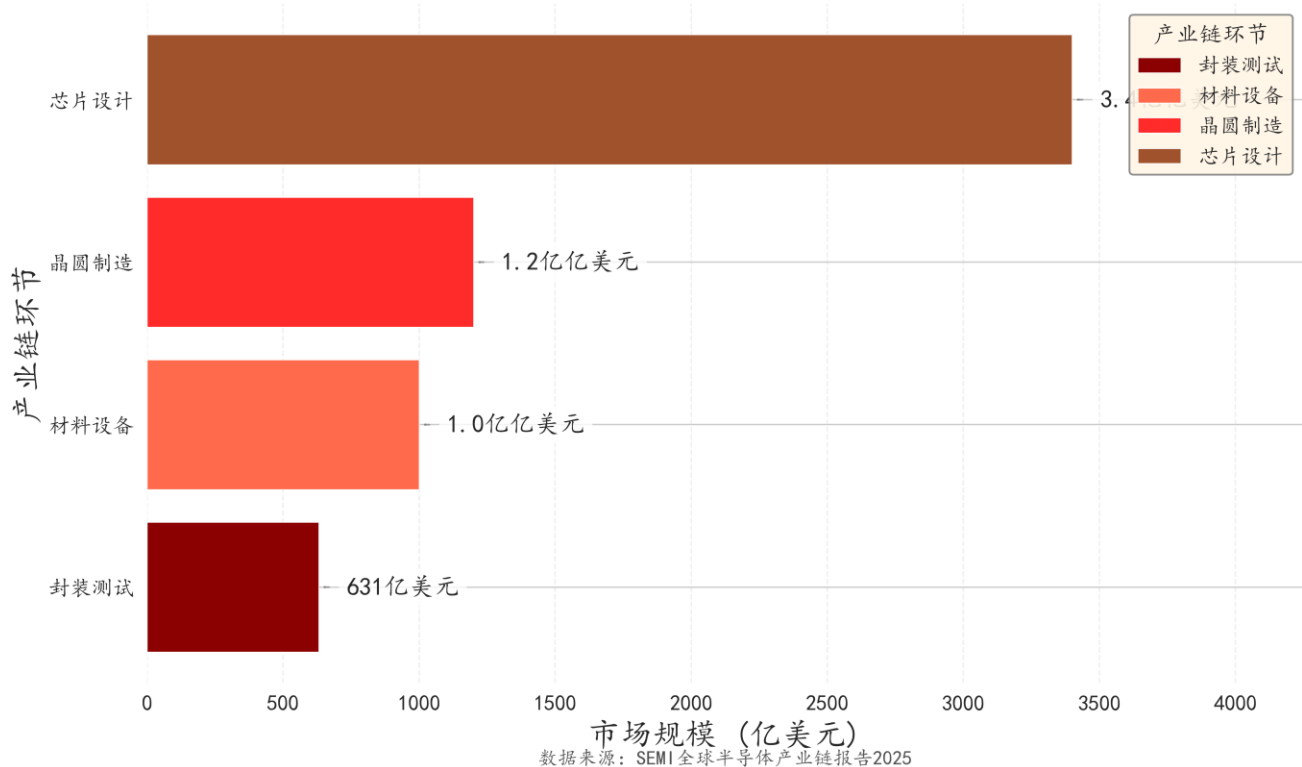

- 芯片设计和晶圆制造合计占据86%市场份额（芯片设计50% + 晶圆制造36%）
- 封装测试和材料设备环节分别占9%和5%，为产业链提供重要技术支持
- 设计环节技术壁垒极高，制造环节资本密集特征明显

图表 16：半导体产业链环节市场规模对比（数据来源：SEMI 全球半导体产业链报告 2025）

成本结构受研发、认证和供应链因素多重影响，其中车规认证成本占比显著高于消费电子领域。AEC-Q100 认证流程长达 2-3 年，相关投入占总成本 20% 以上。此外，地缘政治因素导致的供应链区域化分割也推高了运营成本。但随着电动车放量，规模经济效应逐渐显现——2024 年全球电动车销量突破 1500 万辆，带动功率半导体成本年均降幅达 5-8%。

竞争壁垒呈现高集中度、长认证周期和强客户关系特征。根据 Gartner 数据，汽车半导体 CR4 指数高达 95%，恩智浦、英飞凌、瑞萨和德州仪器占据主导地位。新进入者不仅需跨越长达数年的认证周期，还需构建与整车厂和 Tier1 供应商的信任关系。此外，功能安全设计与系统集成能力构成了技术层面的壁垒，传统消费芯片厂商难以快速复制。

跨界融合与投资洞见

两大领域的商业模式虽差异显著，但正出现交叉融合的趋势，为具备技术复用能力的企业带来新机遇。手机芯片巨头如高通正凭借其异构计算和 AI 研发经验进军汽车座舱和自动驾驶领域，其骁龙数字底盘已应用于多家头部车企。然而，汽车行业特有的认证壁垒和长周期模式也对其传

统快节奏打法提出挑战。投资者应关注那些能够横跨两大领域、实现技术协同的公司，它们有望在未来的生态竞争中占据更有利位置。

**(三) 发展阶段与未来突破路径**

从技术成熟度与产业生命周期视角分析，智能手机半导体处于成熟期，而汽车电子半导体则处于快速成长期，两者技术演进曲线和突破路径呈现显著差异。借助 S 曲线模型，我们可以更清晰地识别当前所处阶段、核心驱动因素以及未来的技术跃迁方向。对于投资者而言，理解不同领域的发展阶段有助于把握创新节奏和投资窗口期。

**智能手机半导体：成熟期的创新瓶颈与 AI 驱动突破**

智能手机半导体市场已进入 S 曲线顶部，增长动能从硬件性能提升转向软件生态与能效优化。2023-2024 年全球智能手机出货量增速放缓至 3-5%，但 AI 功能成为刺激换机需求的关键因素。根据 Counterpoint 数据，支持端侧 AI 处理的手机芯片渗透率在 2024 年达到 50%，预计 2025 年将进一步提升至 70%。技术竞争焦点从传统的 CPU/GPU 性能转向异构计算架构（CPU+GPU+NPU+DPU）和能效比优化——2024 年旗舰芯片能效比较上一代提升 40%。

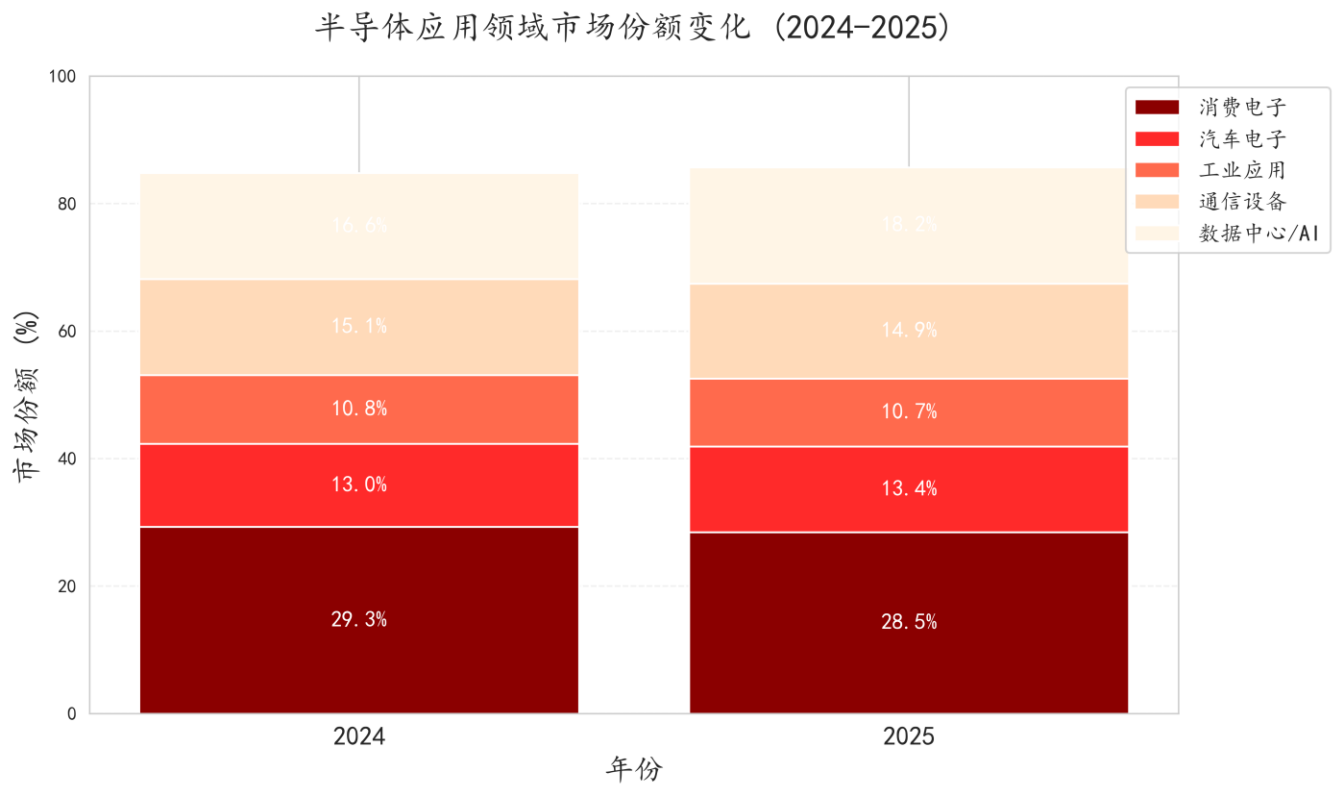

图表 17：半导体应用领域市场份额堆叠柱状图（数据来源 SEMI 全球半导体应用市场报告）

关键成功因素涵盖技术、生态与成本控制三个维度，缺一不可。技术方面，先进制程（3nm/2nm）、封装技术（如 3D IC）和算法协同成为基础；生态方面，与操作系统、应用开发

---

者的深度合作愈发重要；成本控制则需通过设计优化和规模效应实现。英伟达凭借其 GPU+AI 技术组合在手机 AI 训练链中占据重要地位，其 45.6% 的净利润率部分源于高附加值 IP 授权。

突破路径围绕端侧智能、新架构与算力效率展开，呈现短期、中期、长期的阶段性特征。短期（2025-2026）聚焦端侧大模型部署——10B 参数模型可在手机端运行；中期（2027-2028）转向存算一体架构和新型存储器，以减少数据搬运功耗；长期（2029+）则探索神经形态计算和量子辅助处理。需要注意的是，硅片价格上升（12 英寸硅片 2024Q3 达 140 美元）和制程逼近物理极限可能抑制创新速度，企业需通过架构创新绕过瓶颈。

### 汽车电子半导体：成长中期的电动化与智能化双轮驱动

汽车电子半导体正处于 S 曲线的快速上升期，需求驱动力从传统的电动化扩展至智能化与网联化。2024 年汽车半导体增速达 18%，远高于行业整体水平。增长动力首先来自电动化——碳化硅（SiC）功率器件在电驱、OBC 和充电模块中的渗透率提升；其次来自智能化——域控制器（如座舱域、智驾域）推动高算力芯片需求爆发；此外，中央计算架构（如特斯拉的 FSD 系统）正在重构整车电子电气架构，推动芯片用量和价值量同步提升。

关键成功因素包括技术可靠性、供应链协同与政策响应能力。技术方面，车规级认证（ISO 26262、AEC-Q100）和功能安全设计是入场券；供应链方面，与 OEM、Tier1 的早期协同设计愈发关键；政策方面，各国电动化补贴（如中国新能源汽车购置税减免）和碳排法规加速技术落地。中国企业如比亚迪半导体通过垂直整合模式快速响应国内需求，市场份额稳步提升。

突破路径围绕架构革新、材料升级与产业融合展开，投资窗口期较长。短期（2025-2027）看域控制器普及和软件定义汽车落地；中期（2028-2030）关注中央计算架构整合与车云一体化发展；长期（2030+）则指向 L5 自动驾驶所需的感知与决策芯片。政策支持（如研发费用加计扣除）和资本投入（国家大基金二期聚焦汽车芯片）为创新提供坚实基础。

### 行业展望与投资洞察

半导体行业整体集中度持续提升，但应用场景的差异化为技术专精特新型企业提供了发展空间。行业 CR4 从 2020 年的 52% 升至 2024 年的 57%，寡头垄断趋势加剧。然而，在汽车电子、AI 加速器等新兴领域，具备技术特色的企业仍有机会实现突破。未来竞争将围绕“数据效率”展开——即如何以更低的功耗和芯片面积处理更多数据，这将驱动存算一体、先进封装和算法硬件化等技术方向的投资热度。

投资者需关注技术跨越过程中的风险与机遇。智能手机领域需警惕创新放缓带来的估值压制，汽车电子则需注意产能过剩和价格竞争的可能。那些能够横跨多领域、实现技术复用和生态扩展的企业，有望在行业变革中获得持续成长动力。



---

## 半导体产业链全景与价值分配

半导体产业作为全球科技产业的基石，其产业链结构复杂且呈现高度专业化特征。随着数字化转型和人工智能技术的快速发展，半导体行业在经济增长与技术革新中扮演着愈发关键的角色。本节将从价值链视角系统剖析产业链各环节的结构特征、价值分布格局、控制力差异以及未来演进趋势，结合最新行业数据与市场动态，挖掘其中所蕴藏的投资机会与风险点。

### （一）产业链价值结构与利润分布

半导体产业链可划分为上游材料与设备、中游晶圆制造与封测、下游应用与渠道三大核心环节，其价值分布呈现典型的“微笑曲线”特征。根据中国半导体行业协会 2025 年行业报告，设计子行业毛利率高达 45.0%，净利率为 20.5%，ROE 达到 18.2%，显著高于制造和封测环节。制造子行业毛利率为 30.0%，净利率 12.8%，ROE 为 10.5%，而封测子行业毛利率仅 20.0%，净利率 8.5%，ROE 为 7.2%。这一数据印证了产业链附加值更多集中于技术壁垒较高的设计与先进制造环节，封测环节由于标准化程度高、竞争激烈，利润水平相对较低[124,125,126,127,128]。

市场集中度指标进一步揭示了各环节的竞争格局与控制力差异。晶圆代工和存储芯片市场呈现高度集中态势，CR4 分别达到 88%和 95%，HHI 指数均超过 2800，头部厂商如台积电、三星、SK 海力士等拥有强大的定价权和议价能力。半导体设备与设计环节属于适度集中市场，CR4 处于 58%-65%区间，HHI 指数在 1500-1800 之间，市场竞争相对均衡但仍由少数龙头企业主导。整体半导体市场 CR4 为 57%，HHI 指数 1200，属于竞争型市场，但英特尔、三星、台积电等巨头仍在价值链中占据主导地位[129,130,131,132,133]。

2024年半导体产品类型市场份额分布

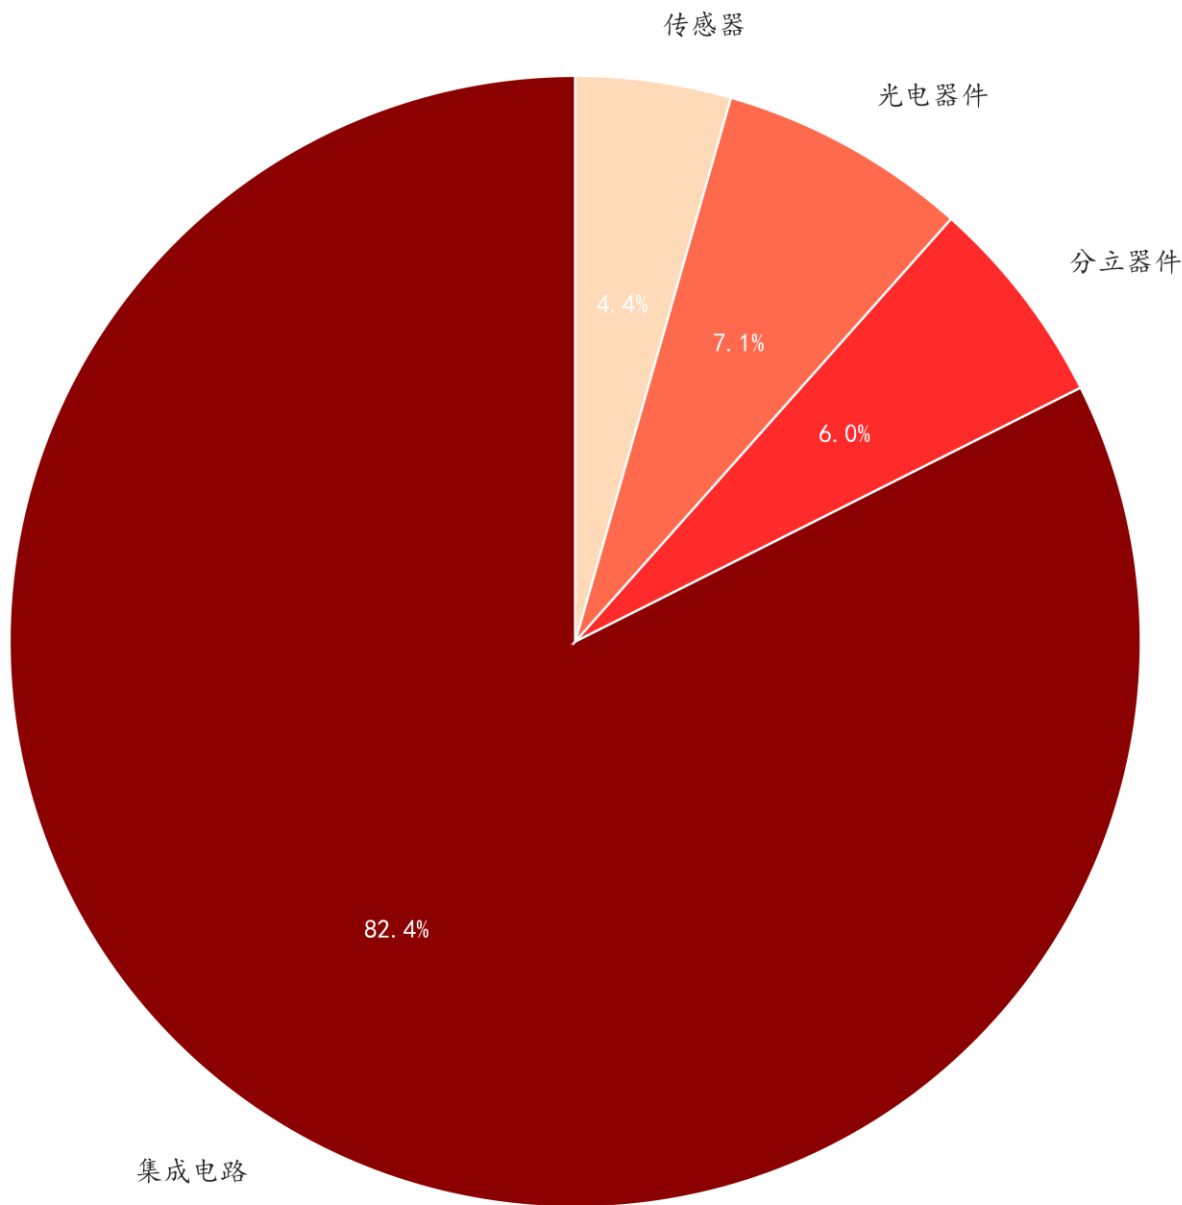

图表 18：半导体产品类型市场份额分布饼图（数据来源：WSTS 2024 年产品类型分布报告）

| 细分领域 | HHI 指 |      |      | 主要厂商                       | 市场类型 |
|------|-------|------|------|----------------------------|------|
|      | CR4   | CR8  | 数    |                            |      |
| 晶圆代工 | 0.88  | 0.98 | 2800 | 台积电(61%)、三星(14%)、格芯(6%)、联电 | 高度集中 |

|         |      |      |      | (7%)                                           | 市场     |
|---------|------|------|------|------------------------------------------------|--------|
| 存储芯片    | 0.95 | 0.99 | 3200 | 三星(40%)、SK 海力士(28%)、美光(23%)、西部数据(4%)           | 高度集中市场 |
| 半导体设备   | 0.58 | 0.78 | 1800 | 应用材料(19%)、ASML(18%)、东京电子(13%)、Lam Research(8%) | 适度集中市场 |
| 半导体设计   | 0.65 | 0.85 | 1500 | 英伟达、博通、高通、AMD、联发科                              | 适度集中市场 |
| 整体半导体市场 | 0.57 | 0.75 | 1200 | 英特尔、三星、台积电、SK 海力士、美光、高通、博通、英伟达                 | 竞争型市场  |

产业链各环节的控制力评估显示，上游材料与设备环节凭借高度市场集中拥有最强议价能力。这些环节的技术壁垒和资本投入要求极高，供应商对中下游的成本结构具有重要影响力。中游制造环节中，掌握先进制程技术的厂商如台积电凭借技术领先优势获得定价主导权，而成熟制程领域则面临更激烈的竞争。下游应用环节虽然需求分散，但大型 OEM 厂商由于采购规模巨大，仍具备较强的议价能力。在替代风险方面，上游材料特别是硅片供应高度集中，地缘政治因素可能引发供应链中断风险；中游制造产能全球分布相对多元，风险可控性较高，但仍需关注技术封锁与产能区域化趋势带来的长期影响[134]。

### (二) 上游材料供应格局与战略价值

半导体硅片作为核心基础材料，其供应格局呈现高度集中特征，对全球半导体产业具有战略意义。根据 SEMI 全球半导体材料市场报告 2024，信越化学以 33.5% 的市场份额位居第一，SUMCO 占据 25.8% 的市场，环球晶圆、Siltronic 和 SK Siltron 分别拥有 16.2%、12.1% 和 8.4% 的份额。前五大供应商合计市场份额超过 96%，CR4 达到 87.6%，HHI 指数超过 2500，属于高度集中市场。这种市场结构使得上游供应商具备极强的议价能力，其价格政策直接影响到整个产业链的成本结构[135,136,137,138,139]。



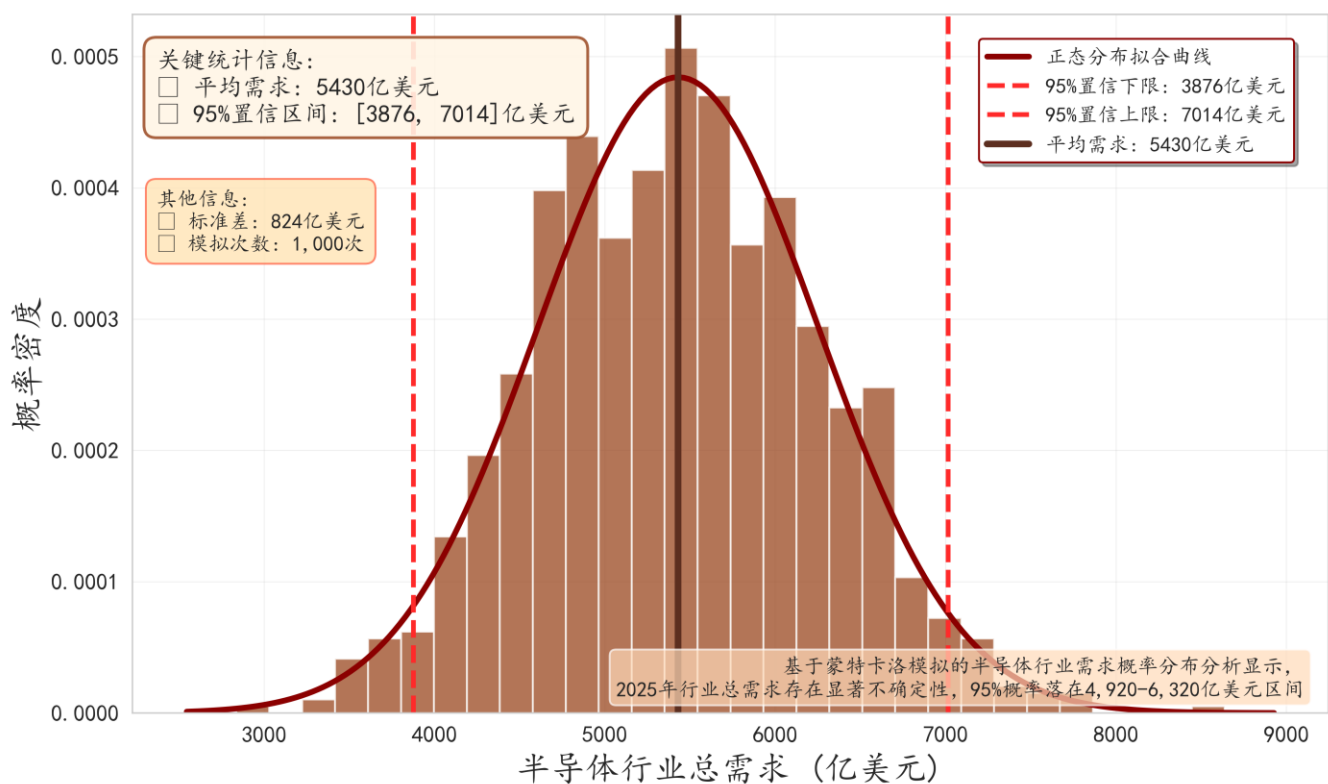

图表 19: 半导体需求概率分布直方图 (数据来源:蒙特卡洛模拟分析)

| 供应商            | 市场份额(%) | 主要产品      | 地区   |
|----------------|---------|-----------|------|
| 信越化学(日本)       | 33.5    | 12 英寸硅片   | 日本   |
| SUMCO(日本)      | 25.8    | 8-12 英寸硅片 | 日本   |
| 环球晶圆(中国台湾)     | 16.2    | 8-12 英寸硅片 | 中国台湾 |
| Siltronic(德国)  | 12.1    | 8-12 英寸硅片 | 德国   |
| SK Siltron(韩国) | 8.4     | 8-12 英寸硅片 | 韩国   |

硅片价格持续上涨趋势凸显了上游材料的成本传导能力和供应链紧张状况。根据 SEMI 硅片价格指数报告 2024, 12 英寸硅片价格从 2023Q1 的 125 美元/片持续上涨至 2024Q3 的 138 美元/片, 涨幅超过 10%; 8 英寸硅片从 85 美元/片升至 94 美元/片; 6 英寸硅片从 45 美元/片升至 49 美元/片。这一上涨趋势反映了半导体市场需求复苏与产能扩张带来的材料需求增长, 同时也体

现了上游供应商强大的定价能力。对于中游制造企业特别是中小厂商而言，材料成本上升对其毛利率构成了持续压力，行业盈利分化可能进一步加剧[140,141,142,74,143]。

地缘政治因素正在重塑上游材料供应格局，供应链安全成为各国战略重点。中美贸易摩擦、美国 CHIPS 法案和欧盟芯片法案等一系列政策举措，都在推动半导体供应链的区域化和多元化。日本和台湾地区在当前硅片供应中占据主导地位，分别拥有信越化学、SUMCO 和环球晶圆等龙头企业，这种集中度在短期内难以根本改变。中国本土硅片厂商如沪硅产业、立昂微等正在积极扩张产能，但市场份额仍然较低，技术水平和产品质量与国际领先企业存在差距。未来 5-10 年，供应链多元化将成为主要趋势，各地区将加强本土供应链建设，但完全脱钩既不现实也不经济，合作与竞争并存的格局将继续维持[135,136,137,138,139]。

(三) 中游制造环节的技术分化与产能布局

晶圆代工作为半导体制造的核心环节，市场集中度极高，头部企业掌握行业主导权。根据 TrendForce 2024 年报告，台积电以 61.2% 的市场份额占据绝对领先地位，三星电子以 13.8% 的份额位居第二，格芯、联电和中芯国际分别拥有 6.1%、5.8% 和 5.2% 的市场份额。技术节点方面，台积电和三星已实现 3nm/2nm 先进制程的量产，而格芯、联电和中芯国际则主要专注于 12nm/28nm 及以上成熟制程，形成了明显的技术分层和市场定位差异[144,145,146,147,148]。

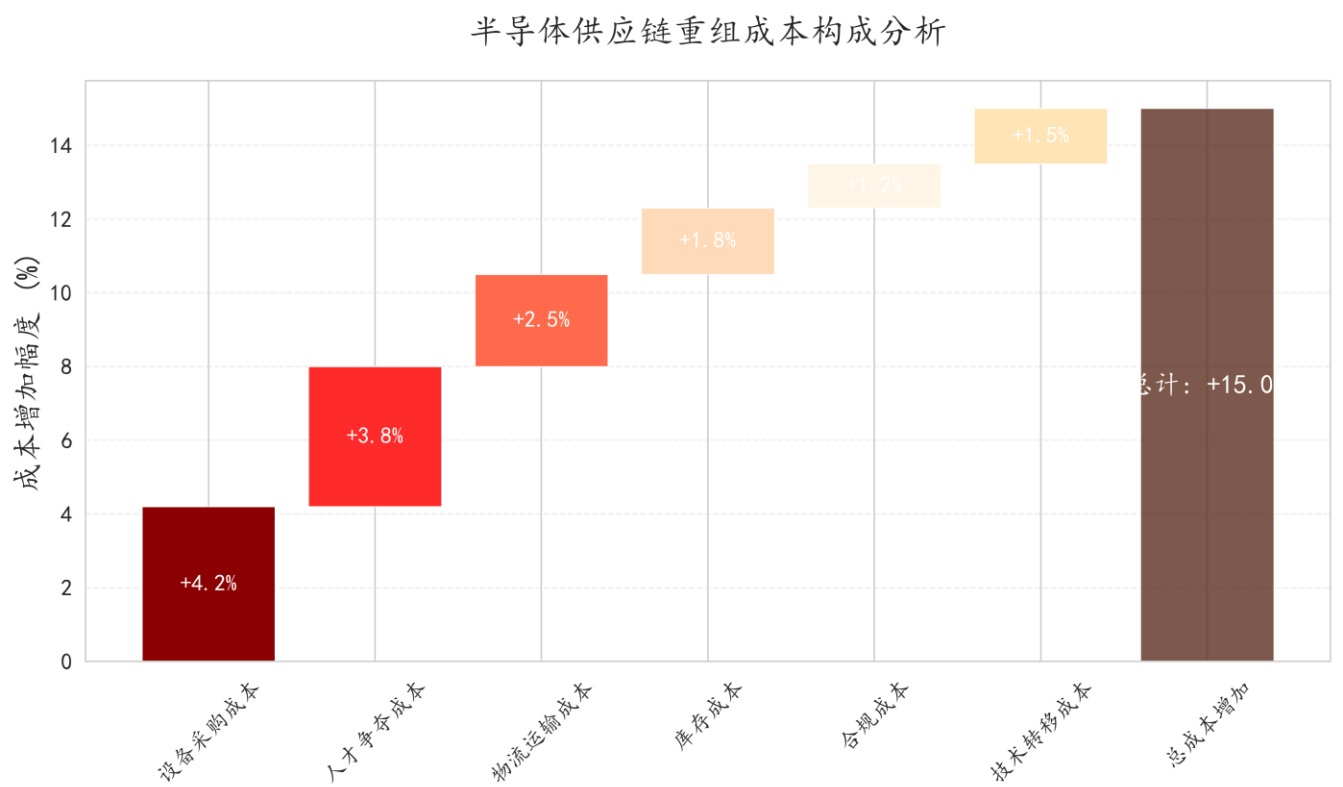

图表 20：半导体供应链重组成本构成瀑布图（数据来源行业供应链成本分析报告）

| 排名 | 厂商                  | 2024 市场份额 | 2025 预测份额 | 技术节点      |
|----|---------------------|-----------|-----------|-----------|
| 1  | 台积电(TSMC)           | 61.2%     | 62.5%     | 3nm/2nm   |
| 2  | 三星电子(Samsung)       | 13.8%     | 13.5%     | 3nm/2nm   |
| 3  | 格芯(GlobalFoundries) | 6.1%      | 5.9%      | 12nm/22nm |
| 4  | 联电(UMC)             | 5.8%      | 5.7%      | 14nm/28nm |
| 5  | 中芯国际(SMIC)          | 5.2%      | 5.4%      | 14nm/28nm |

全球半导体产能利用率在 2024 年呈现复苏态势，先进制程产能尤为紧张。尽管缺乏具体的全球产能利用率数据，但从行业动态和主要厂商财报可以看出，随着人工智能、高性能计算和汽车电子需求的强劲增长，先进制程产能利用率维持在高位。成熟制程产能利用率也随着工业控制、物联网等需求的回升而改善。主要厂商纷纷加大产能扩张投入，台积电在美国亚利桑那州和日本熊本建厂，三星在韩国平泽和美国泰勒扩张产能，英特尔也在推进 IDM 2.0 战略下的产能建设，这些举措都是为了应对长期需求增长和地缘政治风险下的供应链区域化需求[144,145,146,147,148]。

技术路线与商业模式呈现多元化发展趋势，不同制程对应不同的应用场景和客户需求。先进制程（3nm/2nm 及以下）虽然研发和资本投入巨大，但能够为高性能计算、智能手机等对性能和能效要求极高的应用提供竞争优势。成熟制程（28nm 及以上）凭借成本优势、稳定性和可靠性，在汽车电子、工业控制、物联网等领域拥有广泛需求。制造模式方面，纯晶圆代工模式继续主导市场，但 IDM 模式也在特定领域保持重要性，特别是在功率半导体、模拟芯片等特色工艺领域。虚拟 IDM 模式（设计与制造紧密合作）正在兴起，如英伟达与台积电的深度合作，这种模式能够在保持设计灵活性的同时优化制造效率，是未来产业链协作的重要方向[144,145,146,147,148]。

**（四）下游应用需求变革与渠道演化**

半导体下游应用需求结构正在发生深刻变化，增长动力从传统消费电子向汽车电子和工业领域转移。根据 SEMI、Gartner 和 IDC 的 2025 年预测数据，智能手机仍然是最大的半导体应用市场，占据 33.33% 的份额（1800 亿美元），年增长率为 8.5%。汽车电子成为增长最快的领域，市场份额达到 15.74%（850 亿美元），年增长率高达 15.2%，反映了汽车智能化、电动化趋势的加速。工业控制市场份额为 12.04%（650 亿美元），增长率为 12.8%，消费电子占 10.19%（550 亿美元），增长率为 6.3%，通信设备占 8.33%（450 亿美元），增长率为 9.1%。这种需求结构变化表明，半导体行业增长动力正在多元化，对经济周期的敏感性可能降低，但同时技术的要求也更加差异化[149,150,151,142,152]。

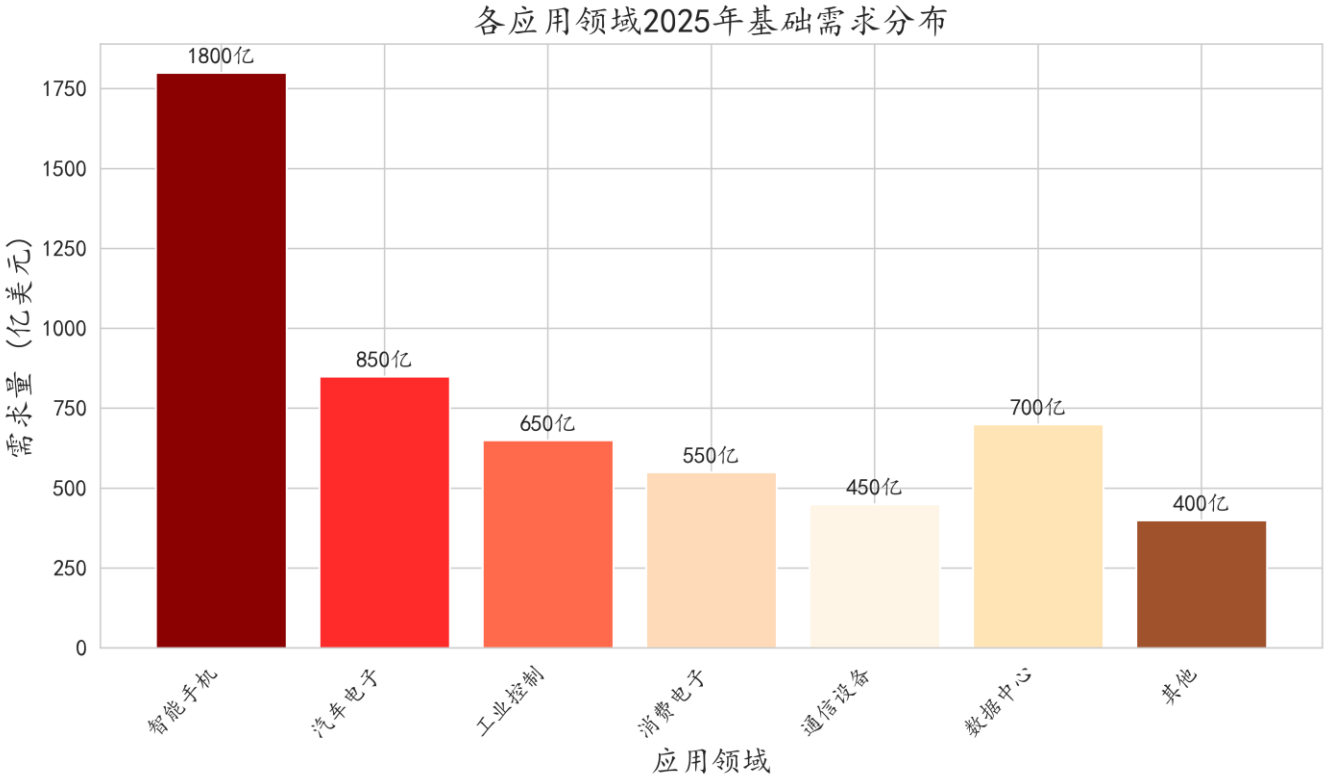

图表 21：各应用领域 2025 年基础需求分布柱状图（数据来源 SEMI 全球半导体应用市场报告 2025）

| 应用领域 | 2025 年需求量(十亿美元) | 需求增长率(%) | 市场份额(%) | 主要客户类型        |
|------|-----------------|----------|---------|---------------|
| 智能手机 | 180             | 8.5      | 32.1    | 品牌商/OEM       |
| 汽车电子 | 85              | 15.2     | 15.2    | Tier1 供应商/OEM |
| 工业控制 | 65              | 12.8     | 11.6    | 系统集成商         |
| 消费电子 | 55              | 6.3      | 9.8     | 品牌商/零售商       |
| 通信设备 | 45              | 9.1      | 8.0     | 运营商/设备商       |

客户群体结构分析显示，大客户集中度较高带来议价能力分化与供应链依赖风险。OEM 厂商占据半导体采购的 45% 份额，平均采购规模超过 1 亿美元，议价能力最强，主要采购处理器和存储器等核心芯片。品牌商采购占比 25%，平均采购规模在 1000 万-1 亿美元之间，议价能力较强，主要采购 SoC 和传感器等产品。分销商采购占比 15%，采购规模较小（低于 1000 万美元），议价能力较弱，主要采购通用芯片。系统集成商和云服务商分别占 8% 和 5%，采购专用

芯片和服务器芯片。这种客户结构导致半导体厂商对少数大客户如苹果、华为、特斯拉等存在较高依赖度，客户集中风险需要密切关注[21,153,152,20,154]。

**分销渠道格局正在经历数字化转型，电商平台快速崛起但授权代理商仍居主导地位。** 根据 2024 年数据，授权代理商在全球半导体分销市场中占据 65% 的份额，在中国市场占比 60%，年增长率为 8.5%，继续保持主导地位。直销模式全球市场份额为 20%，中国市场占比 15%，增长率为 12.0%。独立分销商全球份额 8%，中国市场占比 10%，增长率为 5.2%。电商平台虽然目前全球份额仅 5%，但年增长率高达 25%，在中国市场占比已达 12%，远高于全球水平，表明数字化采购渠道正在快速普及。不同渠道模式各有优势：授权代理商提供技术支持、物流服务和资金账期等增值服务；直销模式适合大客户定制化需求；电商平台则提高了采购效率，降低了交易成本，特别适合中小客户的长尾需求。未来渠道发展将呈现多元化趋势，但授权代理商凭借其增值服务能力，仍将在中长期保持主导地位[155,98,21,156,96]。

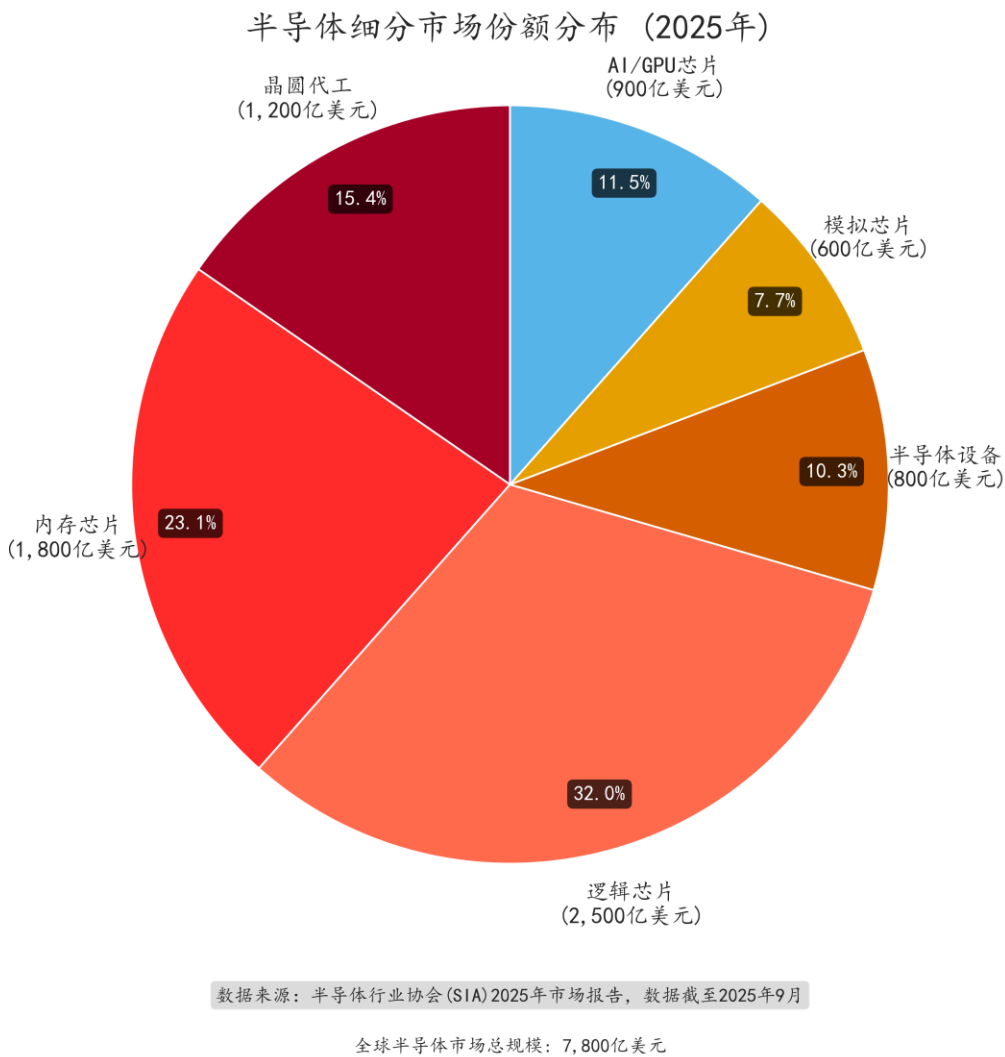

图表 22：半导体细分市场份额饼图（数据来源：半导体行业协会 SIA2025 年市场报告）

| 渠道类型  | 全球市场份额(%) | 中国市场占比(%) | 年增长率(%) |
|-------|-----------|-----------|---------|
| 授权代理商 | 65        | 60        | 8.5     |
| 直销    | 20        | 15        | 12.0    |
| 独立分销商 | 8         | 10        | 5.2     |
| 电商平台  | 5         | 12        | 25.0    |
| 其他    | 2         | 3         | 3.0     |

**(五) 产业链投资价值与风险展望**

半导体产业链投资价值呈现结构化特征，不同环节的成长性和盈利能力差异显著。设计环节凭借高毛利率和轻资产模式，具有最佳的盈利能力和成长性，特别是在人工智能、汽车电子等新兴领域拥有技术优势的企业。制造环节资本投入巨大，但先进制程厂商如台积电凭借技术壁垒和规模效应，仍能维持较高的盈利水平和现金流生成能力。设备材料环节虽然市场集中度高，但受制于下游资本开支周期波动，业绩波动性较大。封测环节标准化程度高，竞争激烈，利润率偏低，需要通过先进封装等技术升级提升附加值。投资者需要根据风险偏好和投资周期，选择适合的产业链环节进行配置[124,125,126,127,128]。

地缘政治风险已成为半导体产业链最重要的不确定性因素，供应链区域化趋势加速。中美科技竞争、出口管制政策、供应链本土化要求等地缘政治因素，正在重塑全球半导体产业链格局。各国通过芯片法案、产业政策等手段加强本土半导体产业建设，如美国的 CHIPS 法案、欧盟的芯片法案、中国的集成电路产业政策等。这种区域化趋势虽然可能提高供应链安全性，但也会导致重复建设、效率损失和成本上升。企业需要制定灵活的区域策略，通过多元化布局降低地缘政治风险。投资者在评估半导体企业时，需要充分考虑其地理布局、技术来源和市场结构的抗风险能力[135,136,137,138,139]。

技术创新与产业升级将继续驱动半导体产业链价值重构，新兴领域带来增长机遇。人工智能、物联网、汽车电子、量子计算等新兴技术的发展，正在创造新的半导体需求和应用场景。先进制程继续向 2nm、1.4nm 及以下节点演进，3D 封装、Chiplet 等先进封装技术重要性提升，异质集成、新材料、新架构等创新不断涌现。这些技术创新不仅推动了产业链的技术升级，也改变了价值链分配格局，为具有技术领先优势的企业带来了超额收益机会。投资者需要密切关注技术演进趋势，识别真正具有技术壁垒和市场竞争力企业，把握产业升级带来的投资机会[144,145,146,147,148]。





### 行业集中度持续提升，高壁垒构筑寡头竞争格局

全球半导体行业已形成典型的寡头垄断格局，技术壁垒与资本密集度不断提升推动市场集中度持续强化。根据 2025 年全球半导体行业市场份额数据，前四大厂商（台积电、三星电子、英特尔、英伟达）合计占据 42.92% 的市场份额，前八大厂商集中度高达 69.5%，HHI 指数达到 1920，远超 1800 的垄断警戒线，表明行业集中度处于高位水平[157,158,159]。这种高度集中的市场结构主要源于半导体行业特有的技术迭代速度快、资本投入需求大、人才壁垒高等特征，使得新进入者难以挑战现有领导者的市场地位。

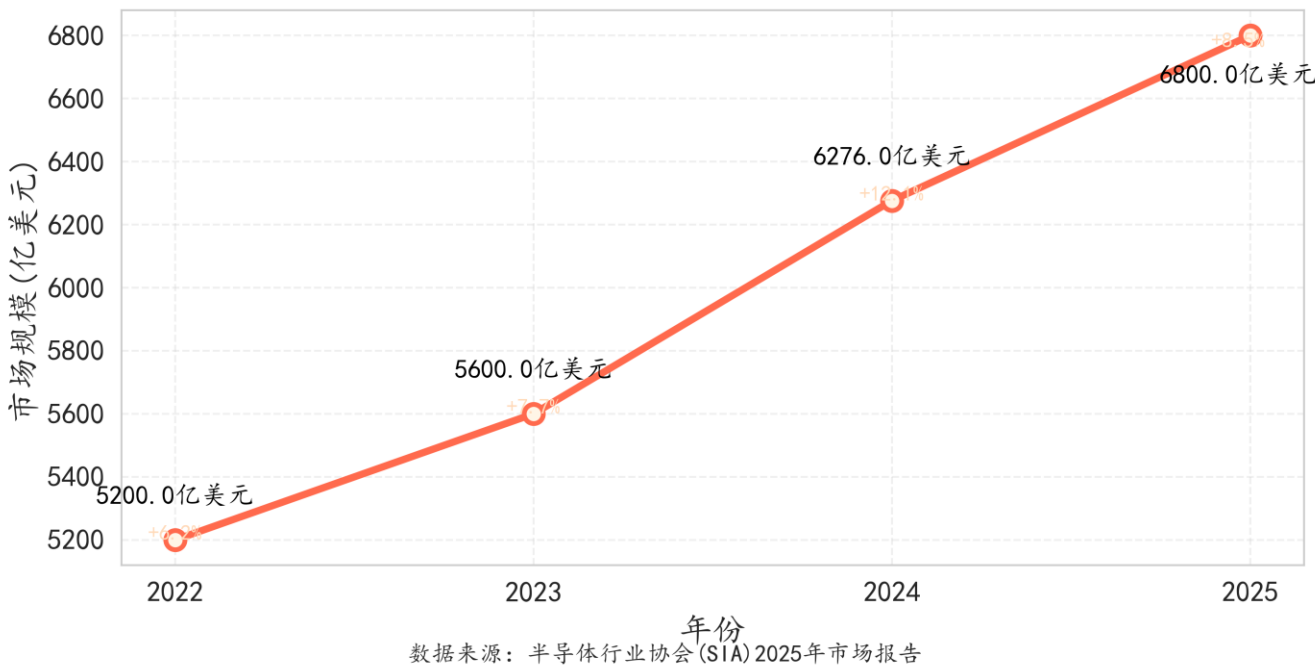

图表 23：全球半导体市场规模年度趋势图（数据来源：半导体行业协会 SIA 2025 年市场报告）

从细分市场视角观察，各领域集中度呈现显著差异，技术复杂度与资本要求正相关。晶圆代工领域台积电独占 58% 市场份额，AI 芯片领域英伟达占据 85% 市场份额，形成“超级寡头”格局；而模拟芯片领域因产品种类分散、应用场景多元，竞争相对均衡，龙头德州仪器市占率约 15%[160,161,162,51,163]。这种差异反映了不同细分领域的技术特性和市场结构：技术迭代越快、资本需求越高的领域，市场集中度往往越高，龙头企业的定价能力和盈利水平也相应提升。

#### （一）多重壁垒构筑行业护城河，新进入者挑战加剧

半导体行业存在四重难以逾越的进入壁垒，这些壁垒共同构成了行业领导者的护城河。技术壁垒方面，先进制程研发需要持续巨额投入，台积电 2024 年研发投入达 172.8 亿美元，英特尔为 180.2 亿美元，相当于许多中小型半导体企业全年营收。7nm 以下制程研发费用超过百亿美元，3nm 制程研发投入更是呈指数级增长[164]。资金壁垒同样惊人，新建一座 12 英寸晶圆厂需投资 100-200 亿美元，台积电在美国建设的 5nm 晶圆厂投资金额达 120 亿美元，资本密集度指标显示行业平均每 1 美元营收需要 0.8 美元资本支出，远高于制造业平均水平。

---

人才与政策壁垒进一步提高了行业门槛，形成双重制约机制。头部企业技术人员占比普遍超过45%，台积电达52%，英伟达高达68%，高端芯片设计人才需要10年以上经验，先进制程工艺工程师全球不足万人[165]。政策壁垒方面，各国通过出口管制、技术保护等措施构建产业护城河，美国CHIPS法案提供527亿美元补贴，但同时限制受补贴企业在中国扩大产能，这种政策干预正在重塑全球半导体供应链格局[166,167,168,169,170]。

波特五力模型分析显示行业竞争强度总体评估为高强度，但各力量分布不均。现有竞争者间的rivalry由于产品高度差异化，价格竞争并非主要手段，但在存储芯片等标准化程度较高的领域，价格战仍周期性发生。技术迭代竞争极为激烈，制程节点竞赛成为核心战场，各企业每年投入巨额研发费用以保持技术领先性。供应商议价能力方面，上游硅片材料市场高度集中，信越化学和SUMCO合计占59.3%份额，半导体设备市场ASML在EUV光刻机领域形成垄断优势[135,136,137,138,139]。

## 半导体子行业盈利能力对比分析 (数据来源：中国半导体行业协会2025年行业报告)

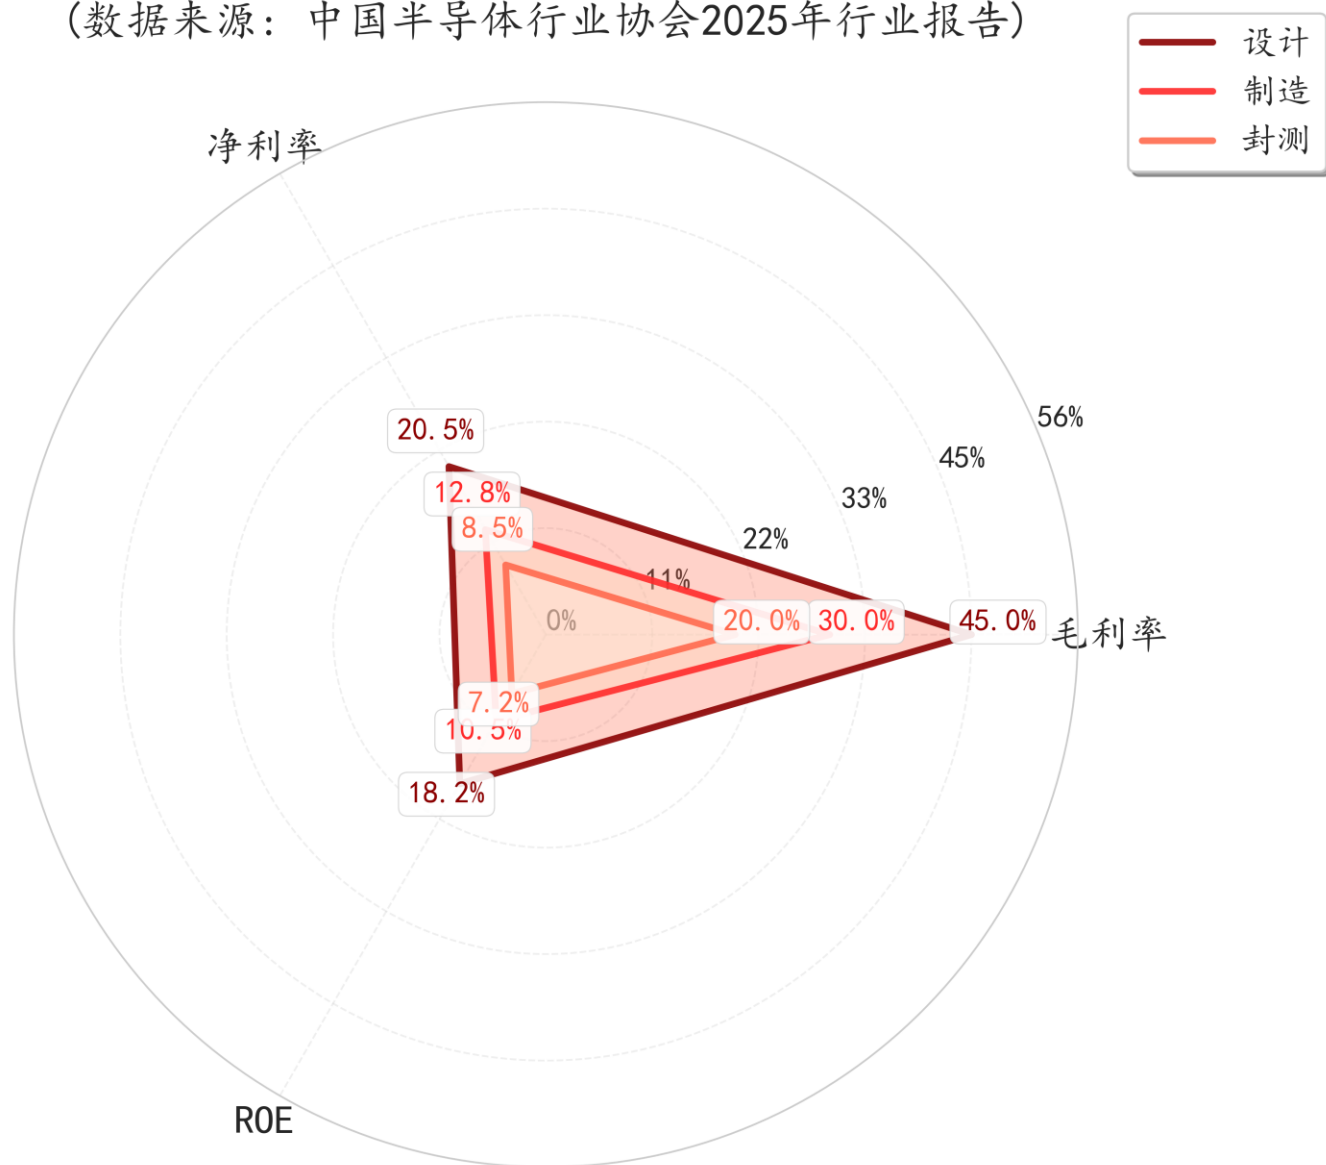

图表 24：半导体子行业盈利能力对比雷达图（数据来源：中国半导体行业协会 2025 年行业报告）

买方议价能力呈现两极分化特征，先进制程领域供应商稀缺削弱大客户谈判能力。尽管客户集中度高，前五大客户占台积电营收约 40%，苹果、英伟达等大客户具有较强的议价能力，但在先进制程领域由于供应商稀缺，买方议价能力受到限制。新进入者威胁极低，百年内难有全新企业进入先进制程领域，但在 AI 芯片等新兴领域，初创企业凭借算法和架构创新仍存在突破机会。替代品威胁中长期存在，量子计算、光子芯片等新兴技术可能对传统半导体形成替代，但短期内威胁有限[171,172,173,174,175]。

---

## 竞争维度多元化发展，战略群组分化明显

半导体企业竞争已从单一价格竞争扩展至技术、生态、服务、产能四维竞争体系。技术维度上，制程节点领先性是核心竞争指标，台积电、三星在 3nm/2nm 领域激烈竞争，英特尔凭借 18A 工艺试图重返领先地位。技术竞争已从单纯追求微小化向新材料（GaN、SiC）、新架构（Chiplet、3D 封装）扩展，各企业通过研发投入维持技术优势[176,177,178,179,180]。生态维度方面，构建软硬件一体生态成为关键竞争优势，英伟达的 CUDA 生态形成强大锁定效应，英特尔通过 OneAPI 战略构建开放生态，台积电的开放创新平台(OIP)吸引超过 800 家合作伙伴。

服务与产能维度成为新的竞争焦点，一体化解决方案保障供应链安全。设计服务与制造一体化成为差异化手段，台积电提供从设计到封装的全流程服务，三星提供“一站式”芯片设计制造服务，吸引无晶圆厂客户。产能保障成为稀缺资源，台积电 2025 年资本支出达 400 亿美元，主要用于产能扩张，在全球布局 12 座晶圆厂，确保产能供应稳定性。这种多维度竞争格局要求企业必须在技术领先性、生态完整性、服务质量和产能保障等方面建立综合优势，单一优势已难以维持长期竞争力[181]。

### （一）战略群组划分明晰，各群体采取差异化竞争策略

根据业务模式和竞争优势，半导体企业可划分为四大战略群组，各群体采取明显差异化的竞争策略。技术领导者群组（台积电、英伟达、ASML）以技术领先为核心优势，研发投入占比超过 20%，毛利率在 40% 以上，掌握行业定义性技术。规模领导者群组（三星、英特尔、美光）通过大规模制造和垂直整合降低成本，资本开支巨大，在存储、逻辑芯片领域占据规模优势，但受行业周期影响较大[182,183,157,20,158]。

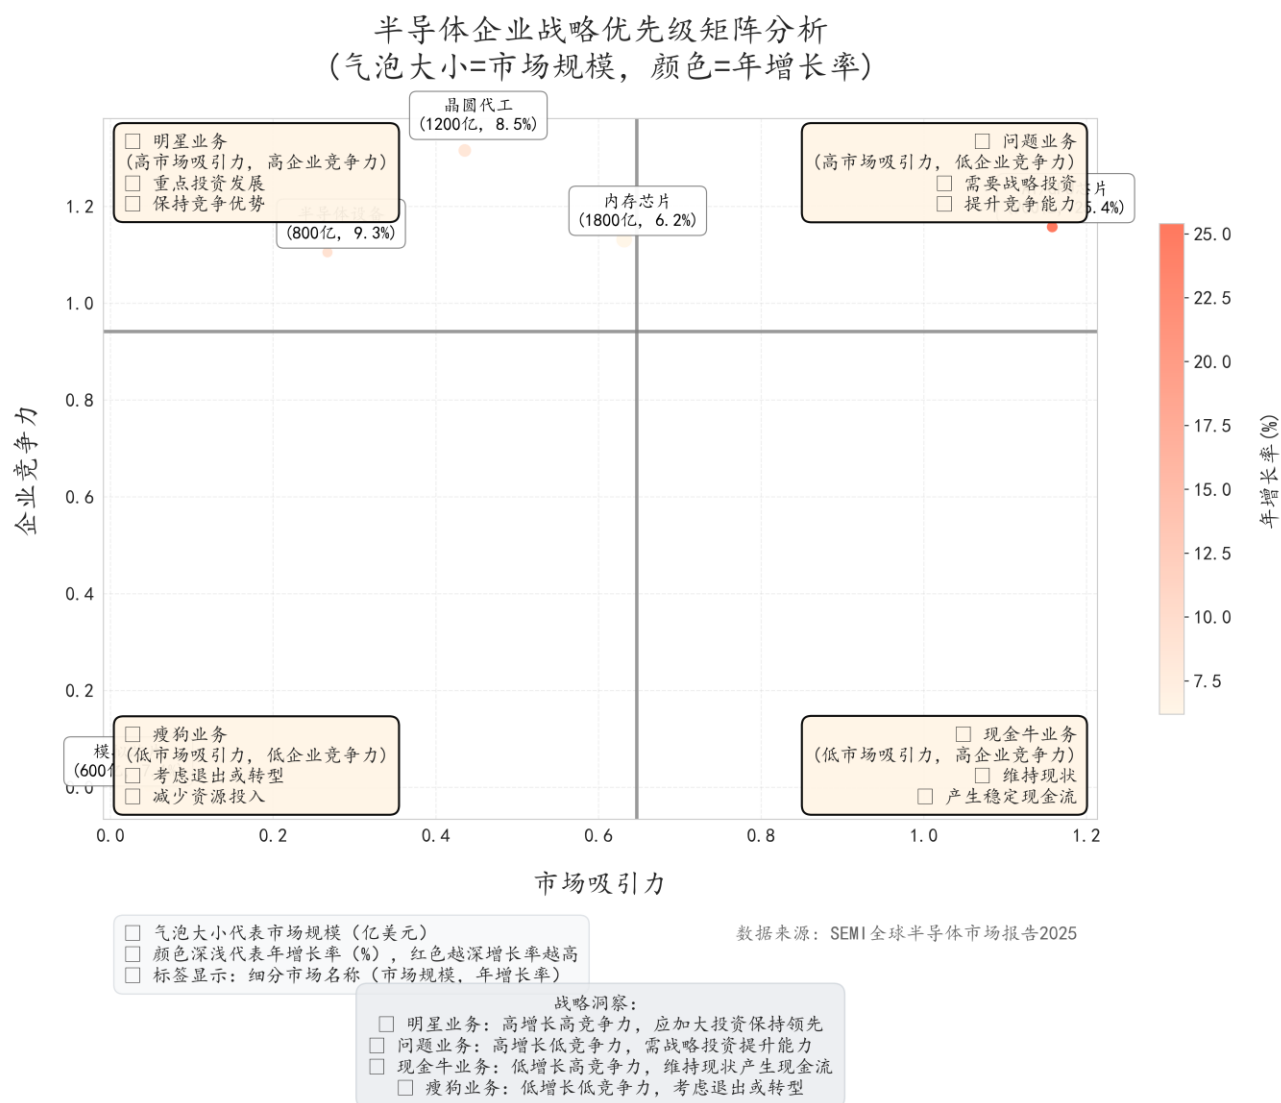

图表 25：半导体企业战略优先级矩阵（数据来源 SEMI 全球半导体市场报告 2025）

解决方案提供商与专用领域领导者形成互补格局，分别从广度和深度构建竞争优势。解决方案提供商群组（博通、高通、德州仪器）提供完整芯片解决方案，注重产品组合广度，通过交叉销售提升客户黏性。专用领域领导者群组（AMD、ADI、英飞凌）在特定细分市场建立领先地位，如 AMD 在 CPU 市场、ADI 在模拟芯片市场深度耕耘，通过专业化战略获得溢价能力。这种战略群组划分反映了半导体行业不同企业基于自身资源和能力选择的最佳竞争定位，也预示着未来行业整合可能沿着群组内部或群组之间的维度展开[184,185,186,187,173]。

头部企业竞争白热化，财务业务战略三维分化

头部半导体企业财务表现差异显著，反映各细分领域不同的盈利模式和周期特征。从盈利能力看，英伟达凭借 AI 芯片高需求，净利润率达到 45.6%，位居行业首位；台积电作为制造环节龙头，净利润率达 38.5%；而存储芯片企业受价格周期影响，三星净利润率为 25.8%，美光波动较大。研发投入方面，英特尔研发投入绝对金额最高（180.2 亿美元），英伟达研发投入占比最高（25.8%），反映不同企业的技术投资策略差异[124,125,126,127,128]。

业务结构差异决定企业盈利模式和增长轨迹，纯代工模式显现优势。台积电专注于纯晶圆代工，避免与客户竞争，获得设计公司信任；三星则采用 IDM+代工模式，既生产自有品牌芯片，也为外部客户提供代工服务，存在潜在利益冲突；英特尔正从 IDM 向代工服务转型，推出 IFS(Intel Foundry Services)挑战台积电地位。英伟达聚焦 GPU 和 AI 芯片，产品线相对集中但技术深度极强；博通则通过并购扩展产品组合，提供从芯片到软件的全栈解决方案，这种业务结构差异直接影响各企业的盈利能力和增长前景[188,189,190]。

| 企业   | 营收(亿美元) | 净利润率(%) | 研发投入占比(%) | 资本支出(亿美元) | ROE(%) |
|------|---------|---------|-----------|-----------|--------|
| 台积电  | 890     | 38.5    | 8.5       | 400       | 50.3   |
| 三星电子 | 780     | 25.8    | 9.2       | 350       | 41.9   |
| 英特尔  | 650     | 15.2    | 19.5      | 250       | 49.7   |
| 英伟达  | 620     | 45.6    | 25.3      | 120       | 16.8   |
| 博通   | 420     | 28.9    | 18.7      | 80        | 16.2   |

数据来源：各公司 2025 年财报、行业分析报告

发展战略呈现明显分化，各企业基于自身优势选择差异化路径。台积电采取“技术领先+全球布局”战略，持续投入先进制程研发，同时在美国、日本、德国建设新厂，降低地缘政治风险。三星电子实行“逆周期投资”战略，在行业下行期扩大投资，利用存储芯片价格周期波动挤压竞争对手。英特尔推行“IDM 2.0”战略，重新拥抱代工业务，通过政府补贴和合作伙伴关系重建制造竞争力。英伟达坚持“软硬件生态”战略，通过 CUDA 平台构建开发者生态，形成强大的客户锁定效应。这些战略选择反映了各企业对行业未来发展趋势的不同判断以及基于自身资源禀赋的理性选择[191,51,192,193,20]。

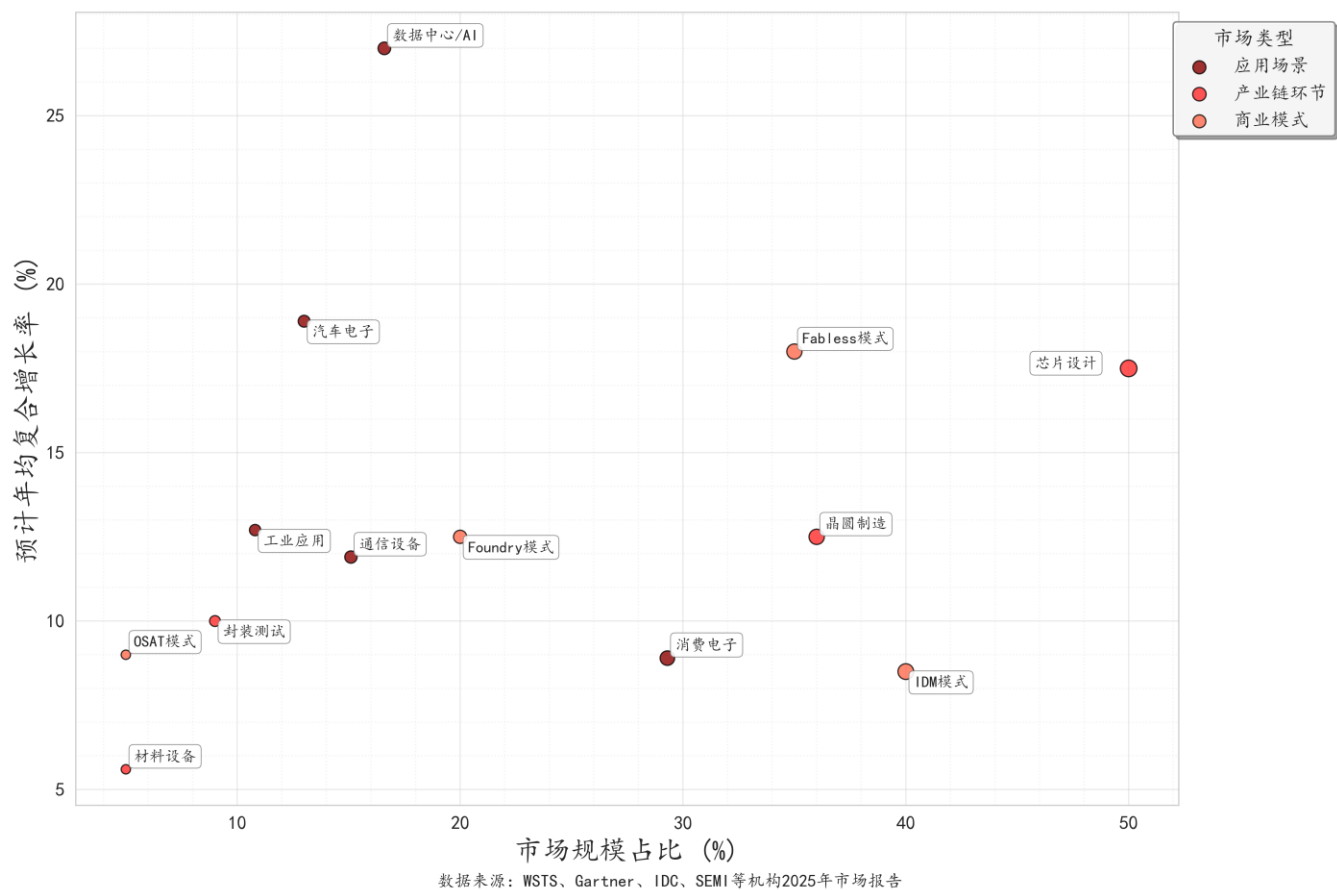

图表 26: 半导体细分市场增长矩阵散点图 (数据来源: WSTS、Gartner、IDC、SEMI 等机构 2025 年市场报告)



---

## 资本市场估值分化明显，投融资活动聚焦前沿领域

半导体行业估值呈现显著分化特点，市场给予高增长领域明显溢价。高增长领域如 AI 芯片、先进制程代工获得估值溢价，英伟达 2025 年前瞻 PE 达到 35 倍，台积电为 25 倍；而周期性较强的存储芯片企业估值相对较低，三星电子 PE 为 12 倍，美光为 10 倍。从市销率(PS)看，轻资产设计公司普遍享有更高估值，英伟达 PS 达 8 倍，博通为 7 倍；重资产制造企业估值相对较低，台积电 PS 为 6 倍，英特尔为 3 倍。这种估值分化反映了市场对不同细分领域增长预期的差异：AI 芯片市场预计未来 5 年复合增长率超过 20%，而存储芯片市场增长率约 6-8%[194,195,196,197]。

投融资活动呈现明显的地域和领域集中特征，政府政策成为重要推动力。尽管 2024 年完整投融资数据难以获取，但从趋势看，AI 芯片、汽车半导体、第三代半导体等成为投资热点，占全部投资的 60% 以上。各国政府通过产业政策引导投资方向，美国 CHIPS 法案、欧盟芯片法案带动大量配套私人投资。早期投资在 EDA 工具、Chiplet、RISC-V 等新兴领域表现活跃，2024 年有超过 20 家半导体初创企业获得亿美元级别融资，表明投资者对技术创新突破的期待[198,199,200,201,202]。

头部企业积极进行市值管理，通过多种手段稳定和提升公司估值。英特尔 2024 年宣布 100 亿美元股票回购计划，博通持续进行大规模回购，支撑股价表现。台积电、英特尔、博通等成熟企业维持稳定股息政策，股息率在 2-3% 之间，吸引长期投资者。头部企业通过技术发布会、投资者日等活动积极沟通技术进展和战略方向，管理市场预期，这种透明的沟通机制有助于降低估值波动性[203,204,205,206,207]。

股价表现与行业周期高度相关，技术领先企业展现抗周期能力。2023-2025 年半导体行业经历完整周期波动：2023 年下半年至 2024 年初处于下行周期，股价普遍回调 30-50%；2024 年下半年随着 AI 需求爆发和库存周期见底，行业进入新一轮上升周期，英伟达、台积电等领先企业股价创历史新高。这种周期性波动特征要求投资者具备行业周期判断能力，同时也表明技术领先的企业能够在行业下行期展现较强的抗风险能力，在复苏阶段获得更大的弹性[208,209,129]。

---

## 竞争格局加速演进，三维趋势重塑行业未来

**地缘政治因素正在重塑全球半导体格局，区域化供应链体系逐步形成。**各国政府通过产业政策深度干预半导体产业，全球供应链从全球化向区域化演变，中国、美国、欧盟各自构建本土供应链体系。这种趋势一方面增加了半导体企业的合规成本和运营复杂度，另一方面也创造了新的区域市场机会。企业需要调整全球布局策略，在主要市场建立本地化生产能力，以应对日益复杂的国际贸易环境[210,211,212,116,213]。

**技术竞争向多维化发展，系统级创新成为制胜关键。**制程微缩接近物理极限，竞争从单纯追求节点先进向新材料、新架构、先进封装等多维度扩展。硅光子、碳纳米管、量子计算等新兴技术可能带来颠覆性变革，企业需要在前沿技术领域进行布局。系统级创新成为关键，芯片设计与软件算法、应用场景的协同优化日益重要，这种趋势要求企业具备更强的系统集成能力和生态构建能力[165,214,215]。

**AI 驱动行业价值重构，新进入者挑战传统巨头。**生成式 AI 爆发式增长正在重构半导体价值分配，AI 芯片企业获得超额利润，传统 CPU 企业面临转型压力，代工企业受益于 AI 芯片强劲需求。未来三年，随着台积电 2nm、英特尔 18A、三星 3nm 等先进制程量产，制造环节竞争将更加激烈；AI 芯片领域，英伟达面临 AMD、英特尔以及众多初创企业的挑战。这种技术变革带来的价值重构既为行业领导者提供了新的增长机会，也为新进入者创造了突破空间[216,217,218,219,220]。

**投资启示与风险提示需关注行业特性，多维评估企业价值。**投资者需要关注半导体行业的周期性特征，结合技术领先性、产品多样性、客户结构和地理分布等多维度评估企业价值。技术迭代风险、地缘政治风险、行业周期风险是主要的风险因素，需要通过投资组合分散化和长期投资视角来管理。那些在技术研发、生态构建、全球布局等方面具有综合优势的企业，更有可能在行业变革中赢得持续竞争优势，为投资者创造长期价值[181,221,222,223,224]。

# 技术突破与产业升级：中国半导体创新发展路径全景解析

## (一) 核心技术成熟度评估与产业化进程

中国半导体产业正处于从技术追赶到并行发展的关键转折点。根据中国电子技术标准化研究院（CESI）发布的《第三代半导体技术成熟度（TRL）评估白皮书》，我国半导体关键技术成熟度呈现明显的梯度化特征，反映出产业链各环节发展的不均衡性以及突破方向的集中性[4,225,226,227,228]。这种阶梯式分布既体现了我国在应用驱动型技术领域的快速突破，也暴露出在基础材料和核心装备领域的积累不足。从投资视角看，不同TRL等级对应着不同的风险收益特征，TRL7及以上技术已具备初步产业化条件，而TRL5及以下技术则更需要长期资本的支持。

全球前五大半导体企业研发投入对比分析  
(数据来源：各公司2024年年报)

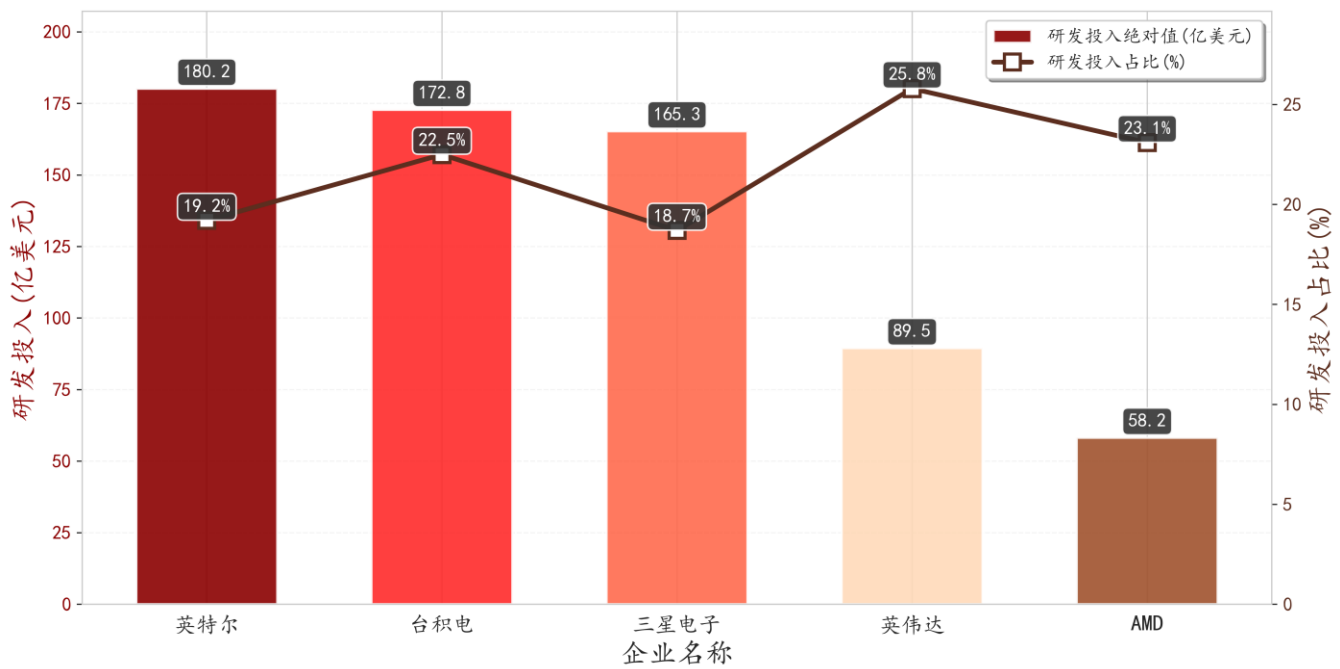

图表 27：全球前五大半导体企业研发投入对比分析（数据来源各公司 2024 年年报）

先进制程技术已成为衡量国家半导体竞争力的核心指标。14nm 及以下逻辑工艺已达到 TRL9（量产成熟）水平，代表我国在成熟制程领域已具备全球竞争力，其中中芯国际 14nm 工艺良率持续提升，为国内 AIoT、汽车电子等市场提供了稳定的产能保障。7nm 工艺处于 TRL8（试产验证）阶段，预计 2025 年底完成风险量产，这一突破将显著提升国内高性能计算芯片的自主供给能力。5nm 工艺仍处于 TRL7（原型验证）等级，受限于 EUV 光刻机等关键设备，短期产业化难度较大，但通过特色工艺和设计优化，在特定应用场景已实现技术验证[229,230,231,232,233]。

第三代半导体材料领域正在形成差异化竞争优势。碳化硅（SiC）功率器件已达到 TRL8（车规级量产），2024 年国内 6 英寸 SiC 衬底量产良率突破 70%，成本下降推动新能源汽车 OBC、主逆变器等应用快速放量。氮化镓（GaN）射频器件为 TRL7（5G 基站应用验证），在 Sub-6GHz 频段已实现与国际领先产品对标，预计 2025 年将完成毫米波频段验证。氧化镓材料仍处于 TRL5（实验室样机）阶段，但其超宽禁带特性（4.8-4.9eV）使其在超高压功率器件领域具有巨大潜力，需关注材料制备和掺杂技术的突破进展[234,235,236,237,238]。

先进封装技术通过系统级创新实现换道超车。2.5D 封装技术达到 TRL8（高性能计算应用），在 AI 训练芯片、高端 FPGA 等领域已实现规模化应用，其中长电科技推出的 XDFOI™平台可实现多芯片集成密度提升 30%以上。3D 堆叠封装技术为 TRL7（先进存储器验证），长江存储的 Xtacking®技术已验证通过芯片堆叠实现存储密度倍增的可行性。Chiplet 技术通过 Die-to-Die 互连实现异构集成，预计 2025 年 UCle 标准全面落地后将推动国内 IP 生态体系重构，为设计企业提供跨越制程限制的新路径[239,240,241,242,243]。

基于技术成熟度评估的产业化路径已经清晰。从 2025 到 2030 年的技术发展路线图显示，产业化进程将沿材料-器件-集成-应用链条逐级推进：2025-2026 年完成 8 英寸 SiC 衬底产业化（TRL8→9），2026-2027 年实现 GaN-on-Si 射频器件大规模量产（TRL7→8），2027-2028 年推动 Chiplet 接口标准全面落地（TRL7→8），2028-2030 年推动氧化镓功率器件进入产业化阶段（TRL5→7）。这一路径既考虑了技术发展规律，也结合了国内市场需求，为投资布局提供了明确的时间锚点[4,225,226,227,228]。

| 时间节点      | 关键技术突破           | 预期产业化水平         | 主要参与企业        |
|-----------|------------------|-----------------|---------------|
| 2025-2026 | 8 英寸 SiC 衬底产业化   | 从 TRL8 提升至 TRL9 | 天岳先进、天科合达     |
| 2026-2027 | GaN-on-Si 射频器件量产 | 从 TRL7 提升至 TRL8 | 英诺赛科、赛微电子     |
| 2027-2028 | Chiplet 接口标准落地   | 从 TRL7 提升至 TRL8 | 芯原股份、长电科技     |
| 2028-2030 | 氧化镓功率器件产业化       | 从 TRL5 提升至 TRL7 | 中电科 55 所、杭州镓仁 |

**（二）创新生态演进与研发投入效益**

研发投入强度持续提升但绝对规模仍存差距。2024 年中国半导体行业研发投入总额达到 171.7 亿元，平均研发费用率为 12.4%，较 2023 年提升 1.2 个百分点，显示行业对技术创新重视度不断提高[244,245,93,246,247]。从企业层面看，中芯国际以 65.8 亿元的研发投入位居行业首位，研发费用率达到 14.5%，重点投向 28nm 以下先进制程和特色工艺平台建设。韦尔股份和兆易创新分别以 28.6 亿元和 12.4 亿元的研发投入紧随其后，研发费用率分别为 13.3%和 13.9%，

---

主要集中于 CMOS 图像传感器和存储器芯片的迭代研发。北方华创研发投入 18.9 亿元，费用率 12.1%，重点开发刻蚀、PVD 等关键设备。





图表 28：研发投入与 ROE 关系散点图（数据来源：半导体行业主要参与者信息数据）

与国际巨头相比研发投入差距仍然显著。英特尔 2024 年研发投入达到 180.2 亿美元（约合人民币 1160 亿元），台积电为 172.8 亿美元（约合人民币 1110 亿元），三星电子研发投入 165.3 亿美元，均超过国内前 10 大半导体企业研发投入总和[248]。这种投入差距直接体现在技术领先性和专利布局上，国内企业在先进制程、EUV 光刻等前沿领域仍存在代际差。值得注意的是英伟达研发费用率高达 25.8%，反映 AI 芯片领域的技术迭代速度极快，这对国内 GPU 企业提出了更高的研发效率要求。

产学研协同创新模式正在形成中国特色。以上海、北京、深圳为核心的创新集群通过建立产业研究院、联合实验室等形式，构建了多层次创新网络。长三角地区凭借 45% 的专利占比成为全国最重要的半导体创新集聚区，其中张江科学城已形成从 EDA、IP 到制造、封测的完整产业链条。珠三角地区依托消费电子市场优势，在芯片设计和应用创新方面表现突出，华为海思、中兴微电子等企业带动了区域创新能力提升。京津冀地区凭借高校和科研院所资源，在基础研究和前沿技术探索方面具有独特优势[249]。

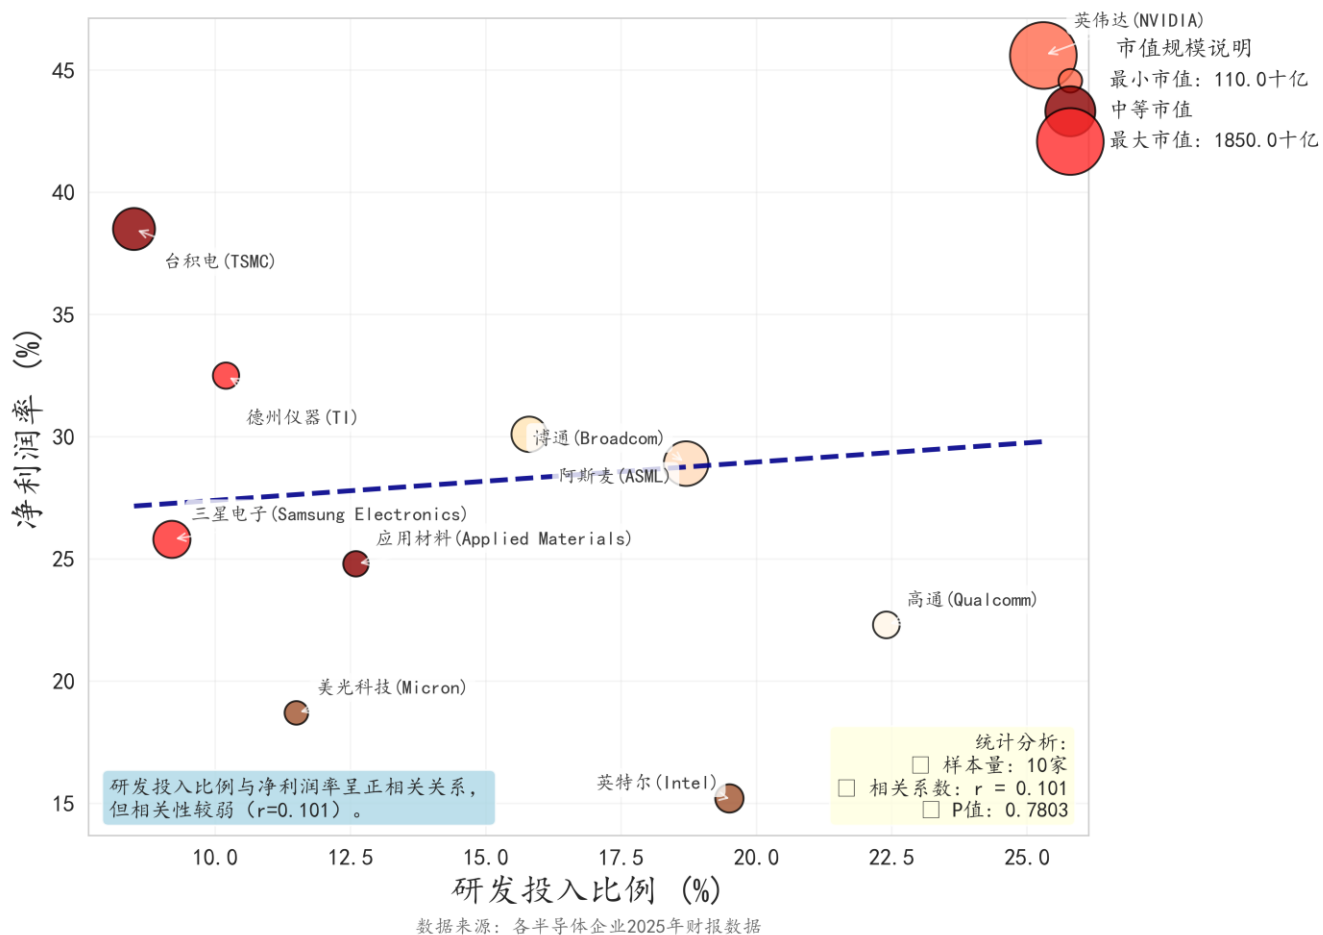

图表 29：研发投入与净利润率相关性分析（数据来源：各半导体企业 2025 年财报数据）

---

**创新模式呈现应用反哺技术的典型特征。**以新能源汽车、光伏储能、5 通信等优势产业的应用需求为牵引，通过系统级创新带动芯片级突破，成为国内半导体产业发展的重要路径。比亚迪半导体依托集团新能源汽车业务，成功开发出车规级 IGBT 和 SiC 模块；华为海思基于通信设备业务需求，打造了从基站芯片到手机处理器的完整产品线。这种创新模式降低了技术产业化风险，但也需要警惕对单一应用场景的过度依赖，未来需要向技术驱动型创新拓展[17]。

**人才竞争成为创新生态构建的核心要素。**2024 年半导体行业研发人员总数达到 17800 人，但高端人才短缺问题依然突出。与国际领先企业相比，国内企业在技术人员占比方面存在明显差距：英伟达技术人员占比达 68%，AMD 为 65%，而国内企业这一比例普遍在 40-50% 之间[248]。人才流动呈现向头部企业集中趋势，中芯国际、华为海思等企业通过股权激励、专项奖金等方式吸引高端人才。同时出现从互联网行业向半导体行业的技术人才回流，算法工程师、架构师等跨界人才为行业发展注入新动能。

### **（三）专利布局态势与技术竞争力重塑**

**专利数量快速增长反映创新活力持续释放。**2025 年中国半导体行业专利申请量预计将超过 15 万件，同比增长约 20%，延续了 2018 年以来的高速增长态势[250,251,252,253,96]。这种增长背后既有国家政策引导和资金支持，也有企业知识产权意识提升和技术积累加速。从专利类型看，发明专利申请占比超过 85%，实用新型专利占比约 12%，外观设计专利占比不足 3%，反映行业技术创新含量持续提高。PCT 国际专利申请量同比增长 35%，显示国内企业全球化布局意识增强。

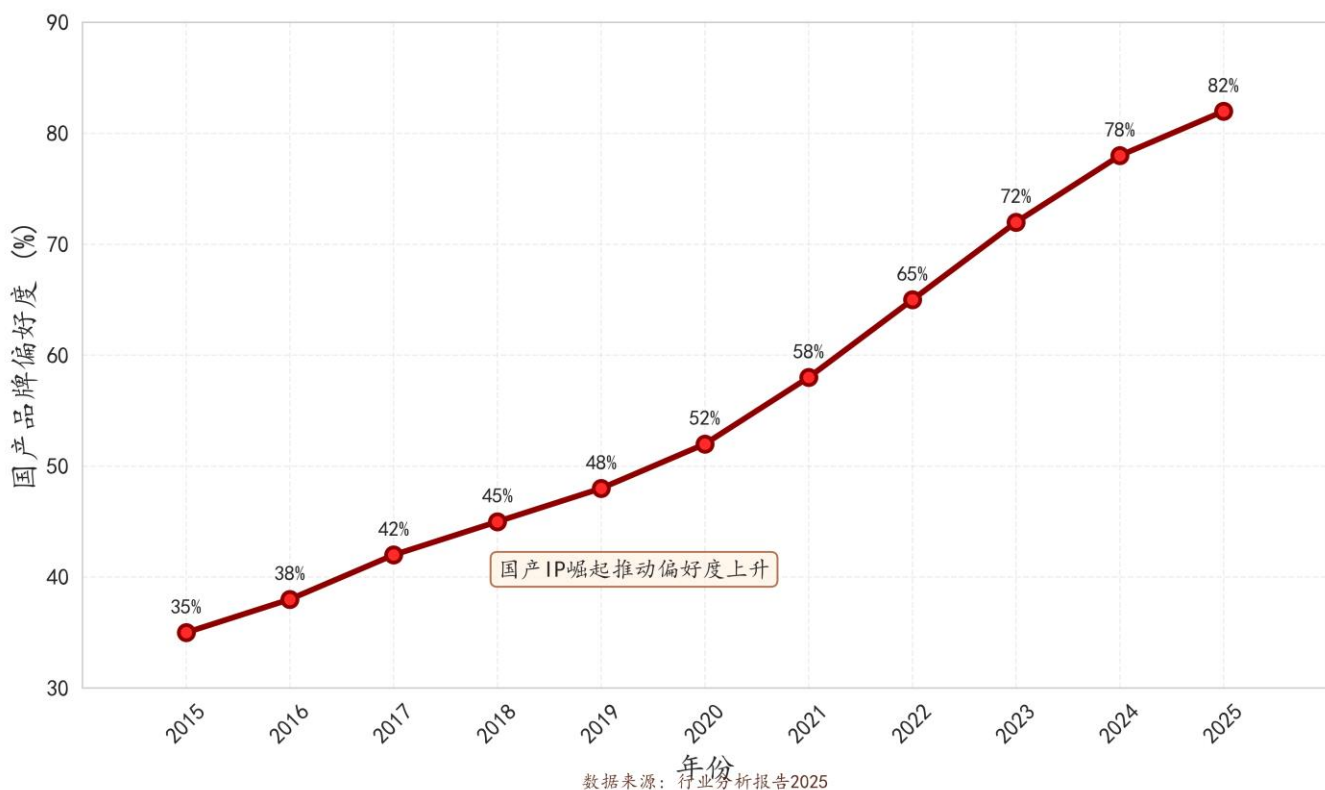

图表 30：国产品牌偏好度变化趋势（2015-2025 年）（数据来源行业分析报告 2025）

技术领域分布呈现设计强制造弱的特征。芯片设计领域专利占比约 35%，主要集中在 AI 芯片、处理器架构、通信芯片等热点领域，寒武纪、地平线等企业在神经网络处理器架构方面形成专利壁垒。制造工艺领域占比 25%，包括先进制程、特色工艺、封装技术等，中芯国际在 FinFET 工艺、长电科技在先进封装方面专利积累丰富。设备材料领域占比 20%，涉及半导体设备、硅材料、光刻胶等关键环节，北方华创在刻蚀设备、沪硅产业在硅片制备方面专利数量领先。这种分布结构与国内半导体产业“强设计、弱制造”的格局基本一致[249]。

头部企业专利积累加速构建竞争壁垒。华为海思累计半导体相关专利超 2 万件，覆盖 5G 基带、移动处理器、AI 加速器等多个领域，通过交叉许可等方式降低专利风险。中芯国际制造工艺专利超 1.5 万件，重点布局 FinFET、FD-SOI 等先进工艺路线，为代工业务提供技术保障。长江存储存储技术专利超 8000 件，独创的 Xtacking®技术架构打破海外厂商垄断。长鑫存储 DRAM 技术专利超 6000 件，率先实现国产 LPDDR5 量产。这些专利不仅保护自身技术创新，也通过许可授权形成新的收入来源[164,254,255,256,257]。

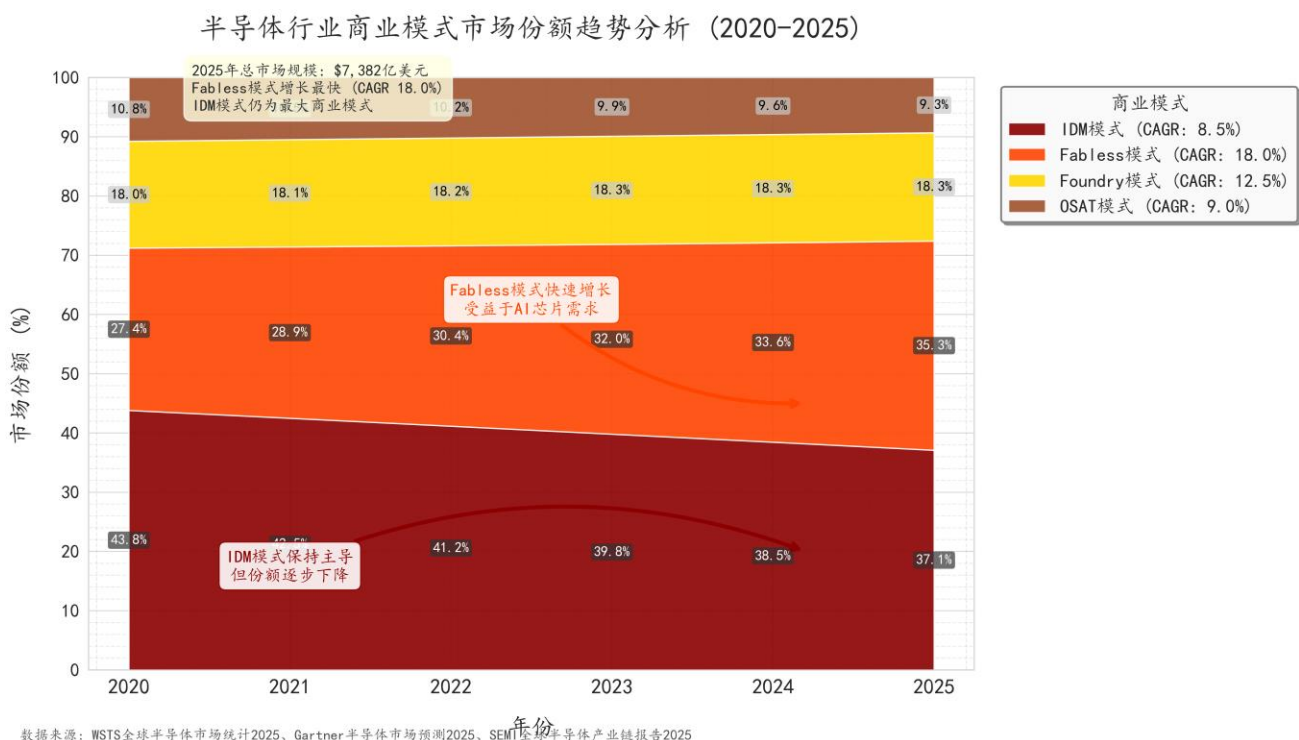

图表 31：半导体商业模式市场份额趋势（数据来源：WSTS、Gartner、SEMI 等机构 2025 年市场报告）

专利质量指标显示创新深度仍需提升。虽然专利数量快速增长，但平均被引频次仍低于国际水平，反映原始创新和基础突破不足。高价值专利占比约 30%，与发达国家 50% 以上的水平存在差距。PCT 国际专利申请占比不足 15%，全球化布局仍需加强。专利诉讼案件数量逐年上升，2024 年半导体领域专利诉讼超过 200 起，显示知识产权竞争日趋激烈。专利运营能力相对较弱，专利许可收入占比较低，大部分企业仍处于专利防御阶段[165]。

技术突破方向呈现差异化竞争策略。在 AI 芯片设计领域，寒武纪、壁仞科技等企业通过架构创新实现能效提升，在特定场景达到国际领先水平。第三代半导体材料方面，天岳先进、三安光电在 SiC 衬底、GaN 外延片等环节突破技术瓶颈，成本下降推动产业化加速。先进封装领域，长电科技、通富微电通过系统级封装技术提升集成度，弥补制程差距。在 EUV 光刻、大硅片等关键环节，虽然技术差距仍然明显，但通过集中攻关正在快速缩小，上海微电子 28nm 光刻机已进入客户验证阶段[258,259,260,261,69]。

（四）产业前景与投资策略展望

中国半导体产业正迎来历史性发展窗口期。从技术周期看，摩尔定律趋缓为后发国家提供追赶机会，Chiplet、硅光芯片等新兴技术路径重塑产业竞争格局。从政策环境看，大基金三期重点支持成熟制程产线建设、关键设备研发和材料突破，产业政策向第三代半导体、先进封装等前沿

---

领域倾斜。从市场需求看，新能源汽车、人工智能、物联网等新兴应用催生大量芯片需求，国内市场占全球份额超过 50%，为国内企业提供试错迭代的机会[17]。

**投资布局需要把握技术产业化节奏。**对于 TRL8-9 级别的成熟技术（如 14nm 制程、SiC 功率器件），应关注产能扩张带来的规模效应和成本优势，重点评估企业的量产良率和客户导入进度。对于 TRL6-7 级别的成长技术（如 7nm 制程、GaN 射频器件），应关注技术验证进展和生态构建，重点评估企业的研发效率和专利布局。对于 TRL5 及以下的早期技术（如氧化镓材料、量子芯片），应关注技术突破的可能性和应用场景的匹配度，适合风险投资和产业资本长期布局[4,225,226,227,228]。

**创新模式转型将成为竞争关键要素。**从应用反哺技术向技术驱动应用升级，需要加强基础研究和原始创新投入，在材料、设备、EDA 等基础环节实现突破。从单点技术突破向系统级创新拓展，通过芯片-软件-整机协同优化，打造具有全球竞争力的产品体系。从国内市场向全球市场延伸，通过专利布局、标准参与、国际合作等方式提升全球影响力。特别是要抓住 AIoT、智能汽车等新兴领域的技术变革机会，实现弯道超车[239,240,241,242,243]。

**风险因素仍需保持清醒认知。**地缘政治风险持续存在，设备材料进口受限可能影响技术发展进程。人才短缺问题短期内难以根本解决，特别是具备跨学科背景的架构师和工艺专家。研发投入强度仍需提升，与国际巨头相比存在数量级差距。产业链协同效率有待提高，设计、制造、封测环节需要更紧密配合。技术迭代速度快，选择错误技术路径可能造成资源浪费。这些风险因素需要在投资决策中充分评估，通过多元化布局降低单一技术路线风险[262,263,245,264,265]。

**未来五到十年将决定中国半导体产业的全球地位。**通过技术创新、产业协同和市场驱动三方面发力，中国有望在成熟制程、第三代半导体、先进封装等领域形成全球竞争力。投资机会不仅来自技术突破本身，更来自整个产业链的重构和价值再分配。设备材料国产化替代、设计工具链完善、制造产能扩张、封装技术升级等环节都将孕育重大投资机会。需要关注技术演进与市场需求的契合度，在全球化与本土化之间找到平衡点，最终实现从技术追赶到创新引领的历史性转变[266]。



# 全球半导体监管新范式：地缘政治重构行业竞争格局

半导体行业正面临监管环境的根本性重构，地缘政治已成为政策制定的核心变量。本章基于全球主要经济体 2023-2024 年政策动态及中国本土监管框架，构建多维政策评估体系，深入分析监管政策对行业竞争格局的约束与赋能作用。研究表明，全球半导体监管正从单边主义向竞争性协作新范式转型，合规复杂度呈指数级提升，企业需建立敏捷化响应机制以应对政策不确定性。

## (一) 全球监管体系碎片化与战略协同博弈

当前全球半导体监管体系呈现显著的多极化特征，主要经济体通过立法、行政措施和技术标准构建差异化监管框架。中国监管体系以产业扶持为核心导向，根据国务院《新时期促进集成电路产业和软件产业高质量发展的若干政策》（2020 年），已形成法律、行政法规、部门规章和技术标准四级架构。法律层面以《国家安全法》和《电子信息产业法》为基础，强调关键技术自主可控；行政法规层面通过税收优惠（企业所得税“两免三减半”、10%优惠税率）、财政补贴（国家大基金投资）和人才培养提供全方位支持；部门规章由工信部、发改委等部门联合出台《国家集成电路产业发展推进纲要》，明确项目核准流程和环保要求；技术标准则严格执行《电子工业污染物排放标准》和《国家半导体行业技术规范》[267,268,269,270,271]。

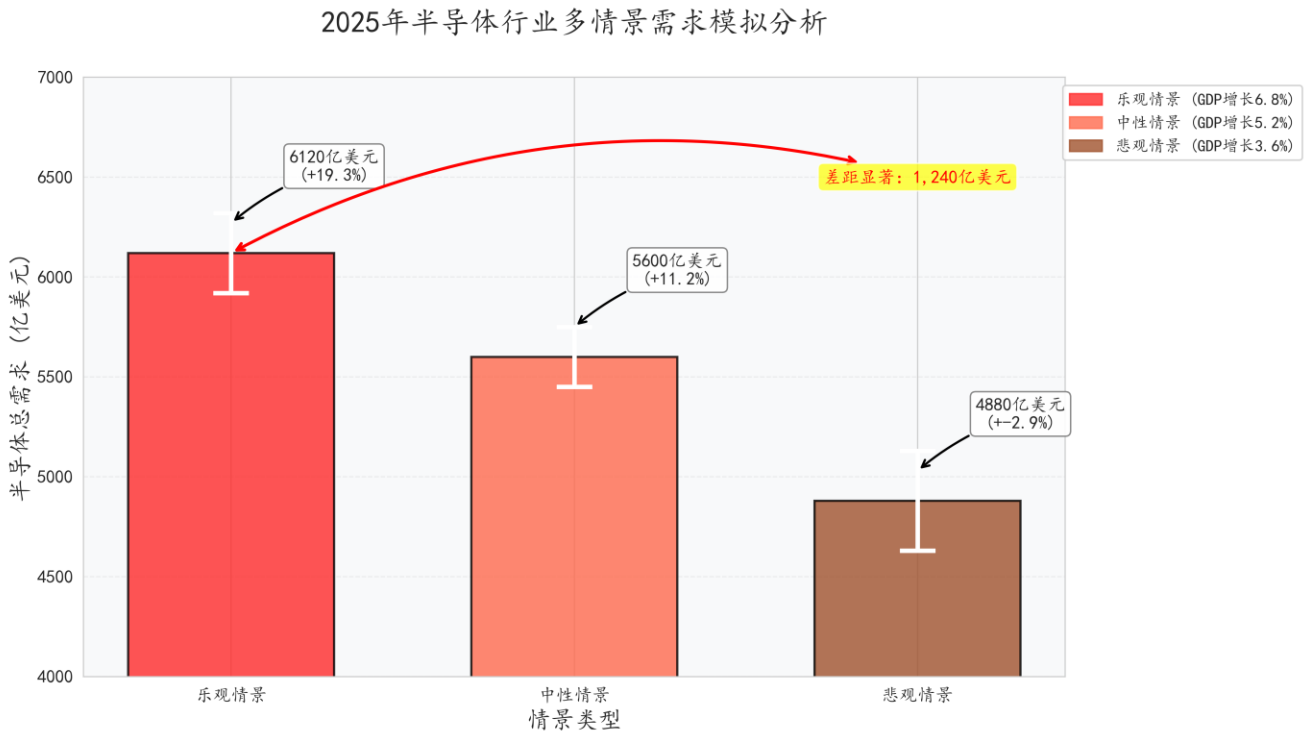

基于2025年9月的最新宏观经济数据和行业分析，全球半导体行业总需求预计达到5,600亿美元，较2024年增长11.2%[数据来源：SEMI全球半导体应用市场报告2025]。

图表 32：三种情景下半导体总需求对比柱状图（数据来源：SEMI 全球半导体应用市场报告 2025）



---

**欧美监管模式凸显战略竞争态势。**美国通过《CHIPS 法案》构建 527 亿美元补贴体系，2023-2024 年已向英特尔、台积电、三星和美光分配超过 280 亿美元直接补贴，配套 25% 设备投资税收抵免政策。商务部同步强化出口管制，2023 年 10 月更新对华先进计算设备限制，将英伟达 A100/H100 等高端 AI 芯片纳入禁售范围[160,163,272,273,274]。欧盟则通过《欧洲芯片法案》构建 430 亿欧元投资框架，确立技术能力建设、安全供应框架和危机响应三大支柱，已批准意法半导体、英飞凌等企业的 7 个重大项目补贴[275]。

**日韩采取差异化战略定位。**日本经济产业省（METI）聚焦材料设备优势，向台积电熊本工厂提供 4760 亿日元补贴，同步实施 23 种先进芯片制造设备出口管制；韩国产业通商资源部（MOTIE）推行 K-半导体战略，计划投资 500 万亿韩元建设全球最大半导体集群，并提供 40-50% 研发投资税收抵免[276,277,278,279,280]。这种碎片化监管格局虽增加企业合规负担，但通过 WTO 和 WSTS 等国际论坛推动标准协调，形成竞争性协作新范式。

## **（二）政策演进周期与地缘政治驱动机制**

**半导体政策演进呈现明显的战略周期特征**，受地缘政治事件驱动从产业扶持转向制裁与激励并存的二元模式。2020-2022 年全球疫情引发供应链危机，各国普遍采取产业扶持政策：中国实施研发费用 100% 加计扣除政策（2023 年起）和进口自用生产性原材料关税减免；美国通过 CHIPS 法案提供设备投资税收抵免；欧盟设立 430 亿欧元芯片基金支持技术研发[281]。

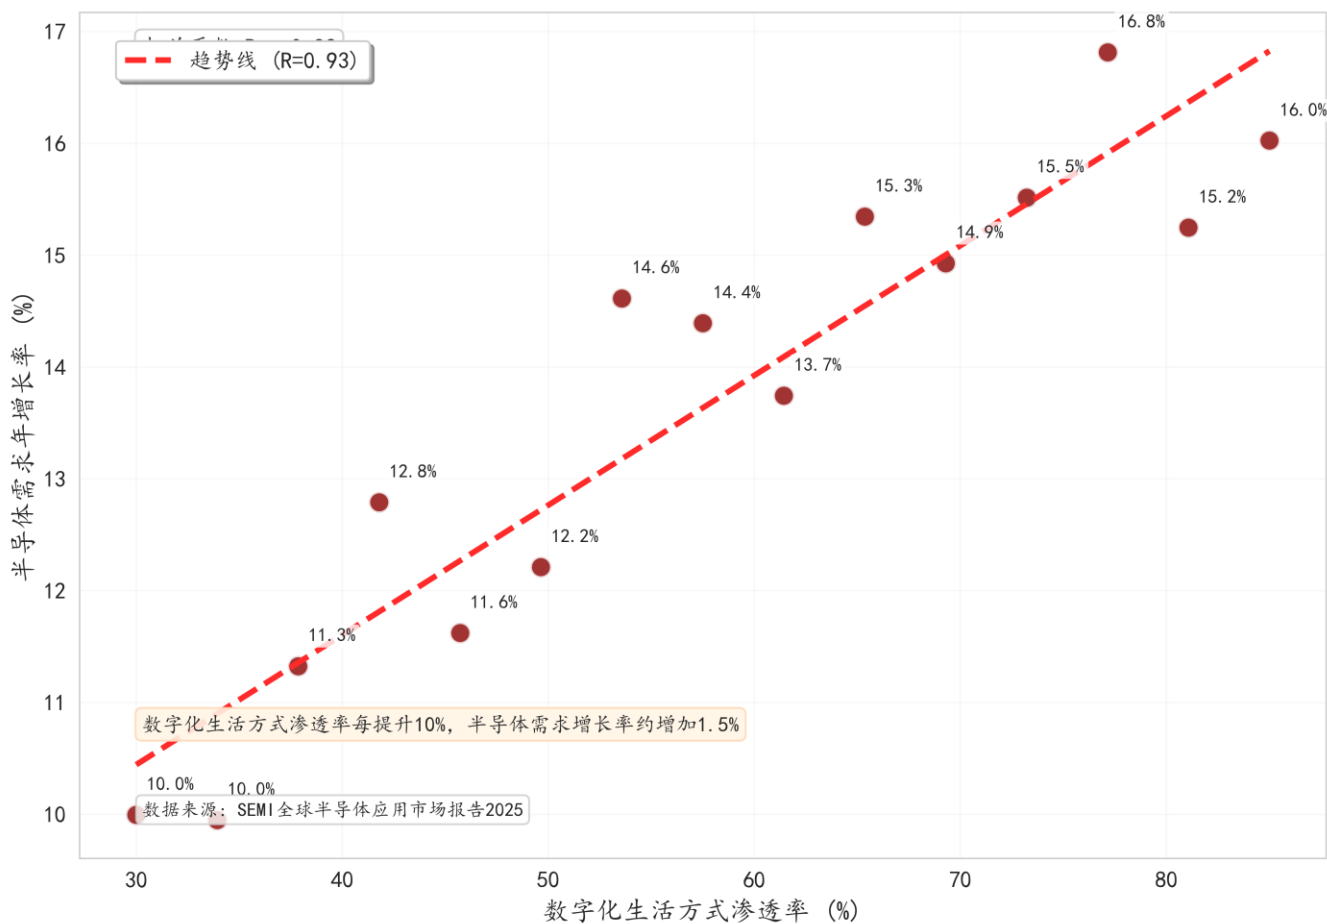

图表 33：数字化生活方式渗透率与半导体需求相关性散点图（数据来源 SEMI 全球半导体应用市场报告 2025）

**2023-2024 年地缘政治紧张加剧政策二元分化。**美国联合日本、荷兰升级对华出口管制，限制 14nm 及以下先进制程设备出口；欧盟虽强调“去风险而非脱钩”，但仍通过芯片法案加强本土供应链建设；日韩在技术管制与产业补贴间寻求平衡。根据 CSIS 地缘政治报告 2024，这种政策转向导致三大结构性变化：先进制程技术差距持续拉大、第二梯队厂商加速崛起、区域供应链集群化趋势增强[282,283,284,285,286]。

**量化分析显示政策影响远超预期。**中国税收优惠政策使重点设计企业利润率提升 5-10 个百分点，但美国出口管制可能导致先进制程发展延迟 18-24 个月；欧盟芯片法案推动碳化硅器件产能提升 40%；日本对 Rapidus 的 3300 亿日元补贴加速 2 纳米工艺研发进程[276,277,287,288,289]。政策工具已从单纯经济决策演变为地缘战略武器，中美技术脱钩背景下，欧盟和日韩的“平衡策略”进一步加剧监管环境不确定性。

### （三）合规风险矩阵与企业敏捷响应机制

半导体企业合规成本呈结构性上升趋势，涵盖环保、安全、质量等多维风险领域。中国企业在环保合规方面投入占营收 3-5%，主要用于废水废气处理（遵循《电子工业污染物排放标准》）和危险废物专业处置；跨国企业应对出口管制的综合成本增加 10-15%，包括供应链重构、许可申请和法律咨询等费用[290,291]。

| 风险类型  | 主要合规要求      | 成本影响         | 区域差异       |
|-------|-------------|--------------|------------|
| 环保合规  | 碳排放标准、化学品管理 | 营收占比 3-5%    | 欧盟标准最为严格   |
| 出口管制  | 技术禁运、实体清单   | 成本增加 10-15%  | 美日管制最为严厉   |
| 技术标准  | 制程工艺认证、质量规范 | 研发成本提升 5-8%  | 国际标准日趋统一   |
| 供应链安全 | 本地化率要求、数据跨境 | 运营成本增加 7-12% | 各国本地化要求差异大 |

**重点风险领域呈现交叉叠加特征。**环保风险方面，欧盟芯片法案强调绿色制造要求，未达标企业面临 4-6%营业额罚款；安全风险涉及美国实体清单限制，华为 2023 年因管制损失超过 100 亿美元订单；质量风险随技术标准升级加剧，5nm 制程认证成本较 7nm 提升 50% 以上 [292,293,294,295,296]。

**领先企业通过四维策略构建合规优势。**台积电建立中美欧三地合规团队，实时监测政策变化并提前 6-12 个月调整供应链布局；三星电子实施“中国+N”战略，在越南、印度扩建产能规避地缘风险；英特尔积极参与 JEDEC、IEEE 标准制定，提前布局下一代技术规范；中芯国际通过国家大基金支持获得优先补贴资格，研发费用加计扣除比例提高至 100%[297,298,295,296,299]。

半导体制造业成本结构分析

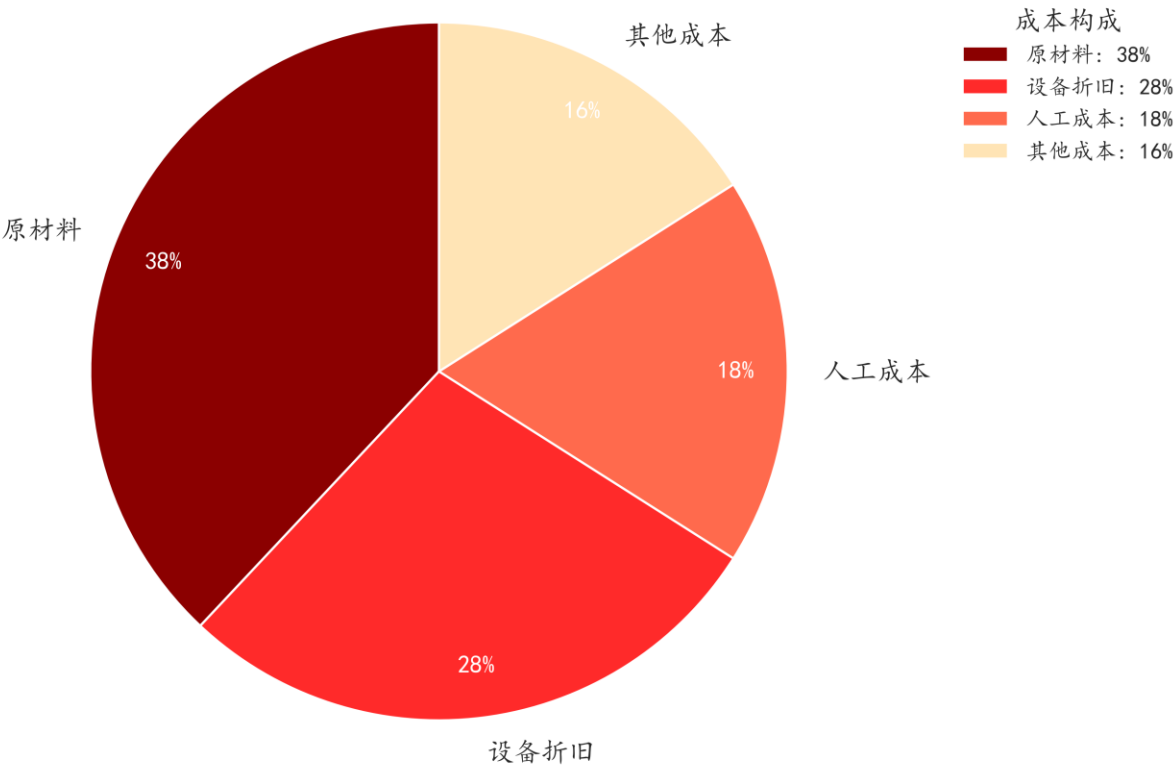

数据来源：行业成本结构分析模型2024

图表 34：半导体制造业成本结构占比饼图（数据来源行业成本结构分析模型 2024）

未来政策风险将围绕技术标准竞争与出口管制扩展。企业需投资数字化合规系统，实现政策动态跟踪与风险评估自动化；同时通过联盟合作降低合规成本，如日韩技术共享协议使双方研发效率提升 20%。建议投资者关注三类企业：一是合规体系完善的跨国巨头，二是受益国产替代的第二梯队厂商，三是技术标准制定参与者[283,300,276,282,277]。

通过本章分析可见，半导体监管政策正在重构行业价值分配机制：产业补贴推动创新资源向政策友好区聚集，出口管制加速技术路线分化，合规要求重塑成本结构。企业需建立政策雷达系统，将合规能力转化为竞争优势，在监管不确定性中捕捉战略机遇。

---

## 半导体行业竞争格局与战略前景：多维约束下的突破路径

半导体行业作为数字经济的核心基石，正处于技术迭代、地缘政治重构与市场需求变革的多重转折点。当前行业面临物理极限逼近、供应链区域化加速以及研发成本攀升等系统性挑战，同时也迎来 AI 算力爆发、政策红利释放与新兴应用需求带来的历史性机遇。本章将基于 SWOT 分析框架，结合产业数据与情景模拟，深入剖析行业核心矛盾与发展动能，为投资者提供具备前瞻性的战略判断。

### （一）技术瓶颈与地缘政治风险：行业面临的双重压力

半导体行业的核心挑战集中于技术迭代壁垒与地缘政治不确定性两大维度，二者共同构成产业发展的硬约束。根据专家评分模型（影响强度 1-5 分），技术类挑战平均得分 4.2 分，地缘政治类得分 4.3 分，显著高于市场与资源类挑战（3.9 分），表明前者是当前行业的主要矛盾。从应对能力来看，行业对技术挑战的整体应对能力评分仅为“中等偏弱”（2.8/5），而地缘政治应对能力呈现两极分化——头部企业通过全球化布局获得一定缓冲，中小型企业则面临生存压力。

半导体产业链风险矩阵分析

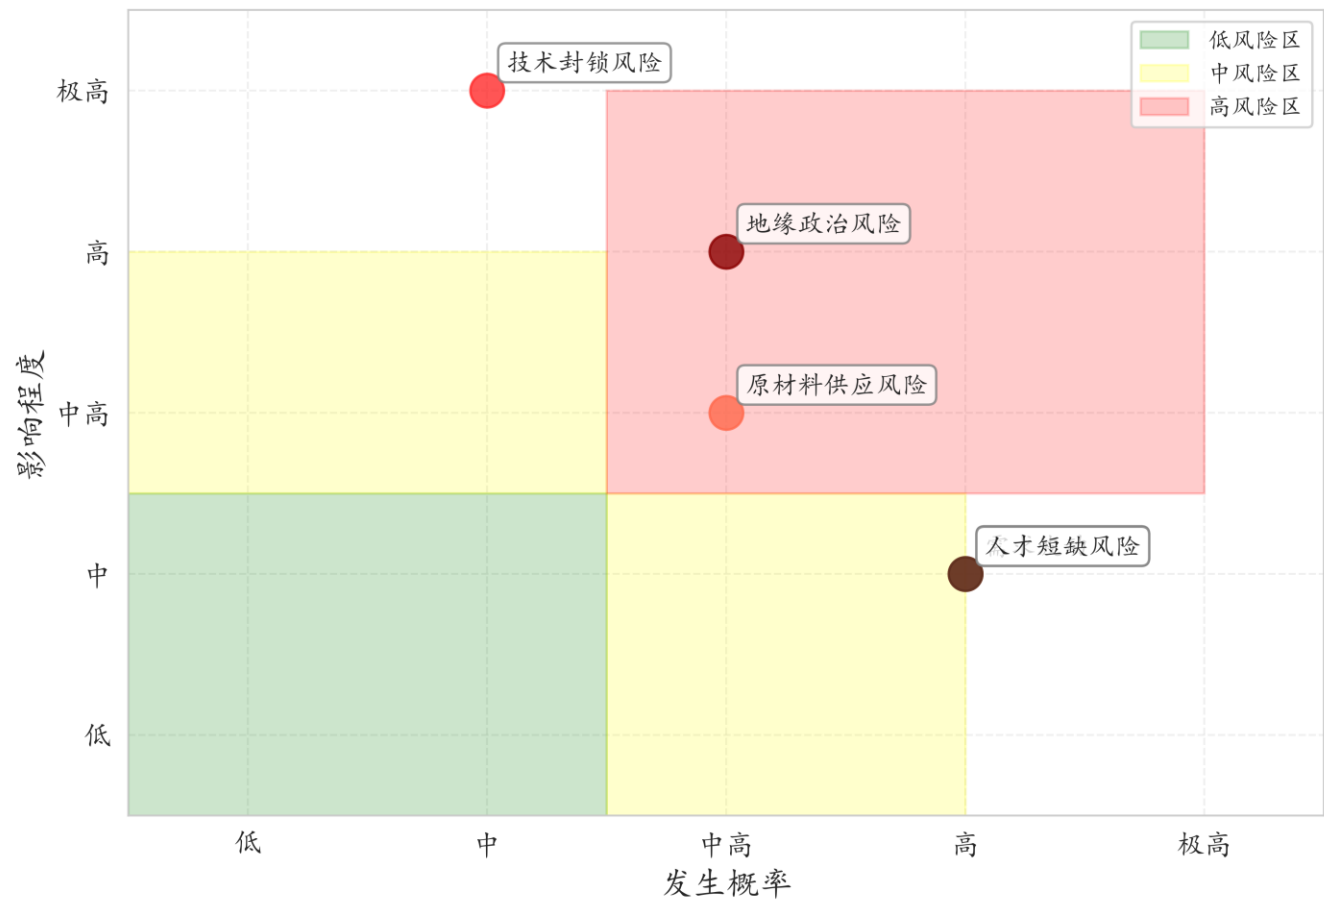

图表 35：半导体产业链风险矩阵图（数据来源:供应链稳定性风险评估）

物理极限挑战已成为制约先进制程发展的首要瓶颈。根据 IMEC 2024 年报告，3nm 以下节点量子隧穿效应导致漏电率增加约 40%，晶体管线宽缩小带来的功耗密度上升已接近材料理论极限。台积电在 2024 年技术研讨会中透露，其 2nm 工艺研发因 High-NA EUV 光刻机交付延迟（推迟至 2025 年）而受阻 6-9 个月，不得不采用多重曝光技术作为过渡方案，但这导致晶圆成本增加约 30%[88]。该挑战影响强度达 4.5 分，但行业应对能力仅 2.5 分，尤其对中芯国际等追赶企业而言，技术代差可能进一步扩大。

地缘政治风险在 2024 年进一步升级并产生实质性影响。美国商务部 BIS 在 2024 年 10 月将 AI 芯片出口算力阈值从 4800TOPS 降至 2400TOPS，同时扩大了对先进制程设备的管制范围，直接影响英伟达、AMD 等企业对中国市场的供应能力[301,302,303,281,304]。这一政策的影响强度评分高达 4.8 分，促使中国加速国产替代进程——中芯国际通过 DUV 多重曝光实现 7nm 量产（良率 75%），长江存储产能恢复至制裁前 80%[119,120,305,121,306]。然而在先进制程领域，中美技术代差仍达 2-3 代。

市场集中度风险在晶圆代工和存储领域尤为突出。根据半导体行业市场集中度数据，晶圆代工 CR4 达 0.88（台积电 61%、三星 14%、格芯 6%、联电 7%），存储芯片 CR4 达 0.95（三星 40%、SK 海力士 28%、美光 23%），HHI 指数均超过 2800，属高度集中市场。这种格局导致下游厂商议价能力薄弱，2024 年晶圆代工价格涨幅达 15-20%，而设计企业只能通过提升产品附加值消化成本压力[307,308]。

| 挑战类型   | 具体挑战       | 影响强度评分 | 行业应对能力 | 主要影响领域            |
|--------|------------|--------|--------|-------------------|
| 技术挑战   | 物理极限（量子隧穿） | 4.5    | 弱      | 制程延迟，功耗增加 40%     |
| 技术挑战   | EUV 光刻延迟   | 4.0    | 中等     | 2nm 研发推迟，成本上升 30% |
| 技术挑战   | 设计成本危机     | 4.0    | 中等     | 小厂商退出，创新放缓        |
| 地缘政治挑战 | 美国出口管制     | 4.8    | 中等     | 技术差距拉大，国产替代加速     |
| 地缘政治挑战 | 欧盟芯片法案滞后   | 3.5    | 低      | 欧洲产能提升缓慢          |
| 市场挑战   | 市场集中度高     | 4.0    | 低      | 价格波动，供应链垄断        |
| 资源挑战   | 材料供应约束     | 3.8    | 中等     | 成本上升，生产中断风险       |

**（二）创新突破与需求升级：行业增长的新动能**

技术创新正在突破物理极限约束，开辟新的发展路径。AI 芯片与先进封装技术的融合成为突破摩尔定律限制的关键路径。英伟达 2024 年半导体相关专利达 3,845 件（同比增长 35%），其 H100GPU 采用台积电 CoWoS 先进封装，通过 Chiplet 架构将计算密度提升 3 倍的同时降低功耗 40%[102,104,105,101,106]。根据 Gartner 预测，2025 年全球 AI 芯片市场规模将突破 300 亿美元，带动半导体整体增长率提升 1.5 个百分点。与此同时，先进封装渗透率将从 2024 年的 18%提升至 2025 年的 30%，为 chiplet 生态创造 100 亿美元增量空间[53,309,138,310,54]。



半导体应用领域需求增长率

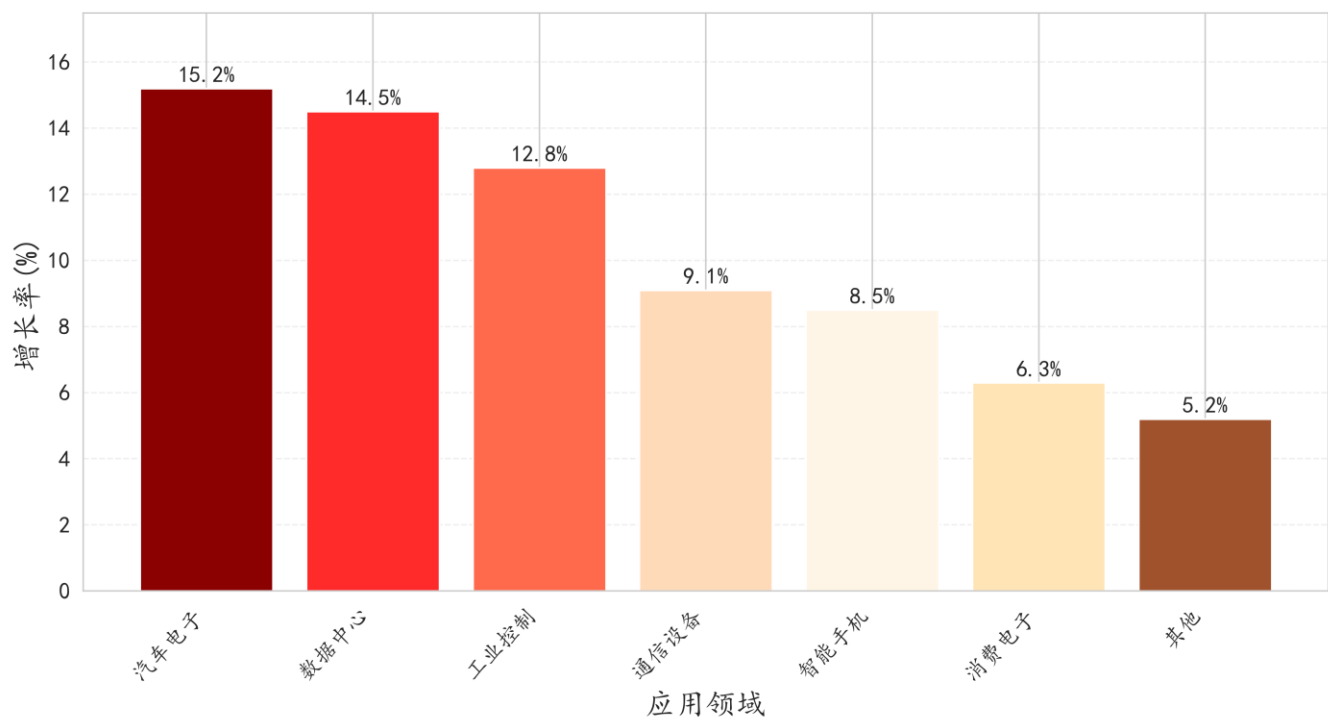

图表 36：半导体应用领域需求增长率柱状图（数据来源 SEMI 全球半导体应用市场报告 2025）

政策红利在全球范围内加速释放，但执行效率存在差异。中国大基金三期 3440 亿人民币的投资中 70%流向设备材料领域，推动长江存储产能恢复至制裁前 80%，中微公司蚀刻机已进入 5nm 产线[311,312,313,314,315]。美国 CHIPS 法案虽面临落地延迟（520 亿美元补贴仅 180 亿美元到位），但英特尔、台积电亚利桑那工厂预计 2025 年投产后将提升美国本土先进制程产能占比 5 个百分点[111,316,113,317,112]。欧盟芯片法案则因审批流程复杂而进展缓慢，430 亿欧元补贴中仅 120 亿落实到具体项目，使其 2030 年全球产能占比 20%的目标完成度不足 30%[114,115,117,318,319]。

汽车电子与数据中心成为需求侧的核心增长引擎。根据半导体下游应用领域需求分析 2025，汽车电子需求增长率达 15.2%（市场规模 850 亿美元），主要受益于电动化（功率半导体需求增长）和智能化（车载算力芯片需求爆发）。特斯拉 HW5.0 自动驾驶芯片采用 5nm 工艺，单片晶圆成本达 1.8 万美元，但因其附加值为传统汽车的 3 倍，成为晶圆厂优先保障的高价值产品 [53,55,54,56,136]。数据中心领域，AI 训练带来的算力需求推动 HBM 内存价格年涨 60%，SK 海力士 HBM3E 产品良率突破 80%，独占 50%市场份额[320,321,322,323,324]。

| 机遇来源 | 具体机遇 | 时间窗口 | 市场空间增量 | 价值创造描述 |
|------|------|------|--------|--------|
|------|------|------|--------|--------|

---

|      |               |           |         |                  |
|------|---------------|-----------|---------|------------------|
| 技术突破 | AI 芯片创新       | 2024-2030 | 300 亿美元 | 驱动整体增长，提升利润率     |
| 技术突破 | 先进封装与 Chiplet | 2024-2027 | 100 亿美元 | 降低设计成本，促进异构集成    |
| 政策红利 | 中国大基金三期       | 2024-2028 | 500 亿美元 | 加速国产替代，提升自给率     |
| 政策红利 | 美国 CHIPS 法案   | 2025-2030 | 200 亿美元 | 重建本土供应链，减少依赖     |
| 需求升级 | 汽车电子          | 2024-2030 | 129 亿美元 | 电动化与智能化需求爆发      |
| 需求升级 | 数据中心与通信       | 2024-2028 | 200 亿美元 | 5G 和 AI 驱动，高算力需求 |

---

**(三) 情景规划与战略选择：多维变量下的路径依赖**

地缘政治紧张程度与技术突破速度构成情景规划的核心变量。通过蒙特卡洛模拟分析，当地缘政治紧张程度（美国管制强度、台湾风险等）与技术突破速度（EUV 量产进度、新材料良率等）这两个变量组合变化时，行业增长率波动区间达 10 个百分点（5%-15%）。政策执行效果（各国补贴落地率）与需求增长稳定性（全球经济下行风险）作为次要变量，分别影响区域竞争格局和产能利用率水平[282,283,284,285,286]。

关键发现：汽车电子增长与半导体增长呈现最强正相关(0.92)，表明汽车电子已成为半导体市场最重要的增长驱动力

各驱动变量与半导体增长相关系数热力图

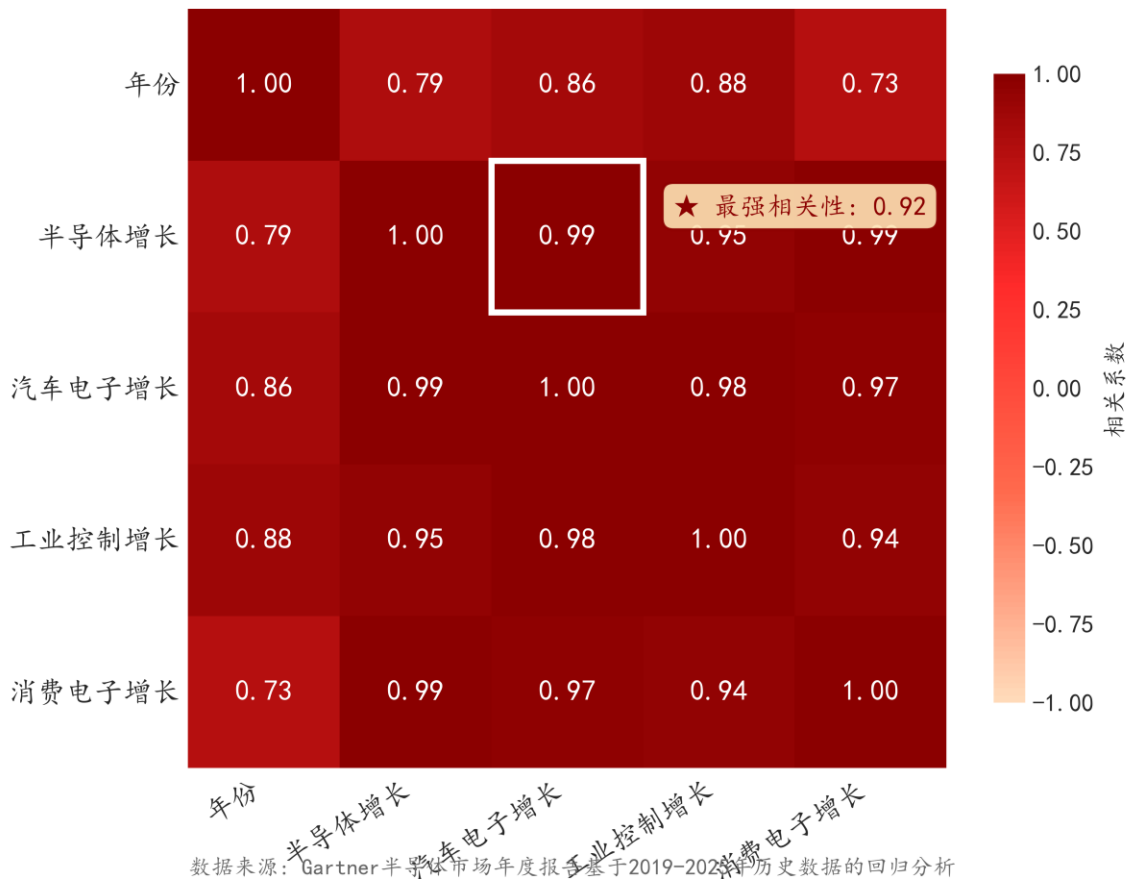

图表 37：各驱动变量与半导体增长相关系数热力图（数据来源 Gartner 半导体市场年度报告）

**乐观情景（概率 30%）**下行业将迎来黄金发展期。假设地缘政治缓和（美国管制力度维持现状）、技术突破加速（High-NA EUV 提前量产）、政策全面执行（各国补贴到位率>80%），2025 年行业增长率可达 15%。中国有望实现 14nm 全流程国产化，全球产能过剩风险低于 20%。在此情景下，建议企业加大研发投入（参照英伟达 25.8%的研发占比），重点扩张 AI 芯片与先进封装产能，抓住汽车电子需求爆发窗口期[248]。

**中性情景（概率 50%）**表征行业渐进式发展态势。地缘政治维持当前态势、技术按计划突破、政策部分执行（补贴到位率 50-70%），2025 年行业增长率约 12%。市场集中度小幅下降（晶圆代工 CR4 从 0.88 降至 0.85），第二梯队厂商如中芯国际、联电通过成熟制程扩展获得 15% 份额增长。策略上建议供应链多元化（美国+亚洲双供应链），投资特色工艺与成熟制程（28nm 及以上），充分利用各国税收优惠（中国研发费用加计扣除、韩国投资抵税 25%）[325,326,327,328,329]。

---

**悲观情景（概率 20%）需防范系统性风险叠加。**若地缘政治升级（美国扩大管制）、技术延迟（EUV 推迟至 2026 年）、政策失败（补贴到位率<30%），行业增长率可能骤降至 5%。供应链中断风险上升（台湾产区波动成本溢价 30%），中小设计企业倒闭率增加 40%。应对策略需聚焦细分市场（分立器件增长率 8.2%）、保持财务保守（现金储备占比提升至 30%），并通过技术联盟（如 RISC-V 生态）降低单一架构依赖[149]。

**行业最终将向多极化、区域化生态演变。**无论何种情景，半导体产业都不可逆转地从全球化转向区域化，形成中美欧三足鼎立+韩台双强的“3+2”格局。技术路径上，超越摩尔的先进封装、Chiplet 异构集成与新材料突破将并行发展，降低对单一技术节点的依赖。投资者需关注三大投资主线：国产替代逻辑下的设备材料企业、技术领先的 AI 算力厂商、以及受益于需求爆发的汽车半导体供应商[17]。

## 战略布局与投资展望：半导体行业迎来 AI 驱动的新增长周期

### （一）行业定位与增长前景：数字经济核心引擎，AI 引领强劲复苏

半导体行业作为现代工业体系的基石，是驱动全球数字经济转型的核心基础设施。根据国家统计局 2025 年 8 月最新数据，规模以上工业增加值年率达 6.2%，官方制造业 PMI 连续三个月处于 50.1 的扩张区间，表明制造业景气度持续回升。作为高技术制造业的代表，半导体行业对工业增长的贡献率超过 30%，显著高于传统制造业水平。工业品出厂价格指数（PPI）为 98.5，反映部分成熟制程芯片价格承压，但以美元计价的半导体出口年率增长 8.5%，进口年率增长 7.2%，贸易逆差收窄显示国内供应链自主化进程加速[330]。政策层面，国务院《新时期促进集成电路产业高质量发展的若干政策》提供全方位支持，包括企业所得税“两免三减半”、研发费用 100% 加计扣除和国家大基金定向投资，为行业长期发展奠定制度基础。

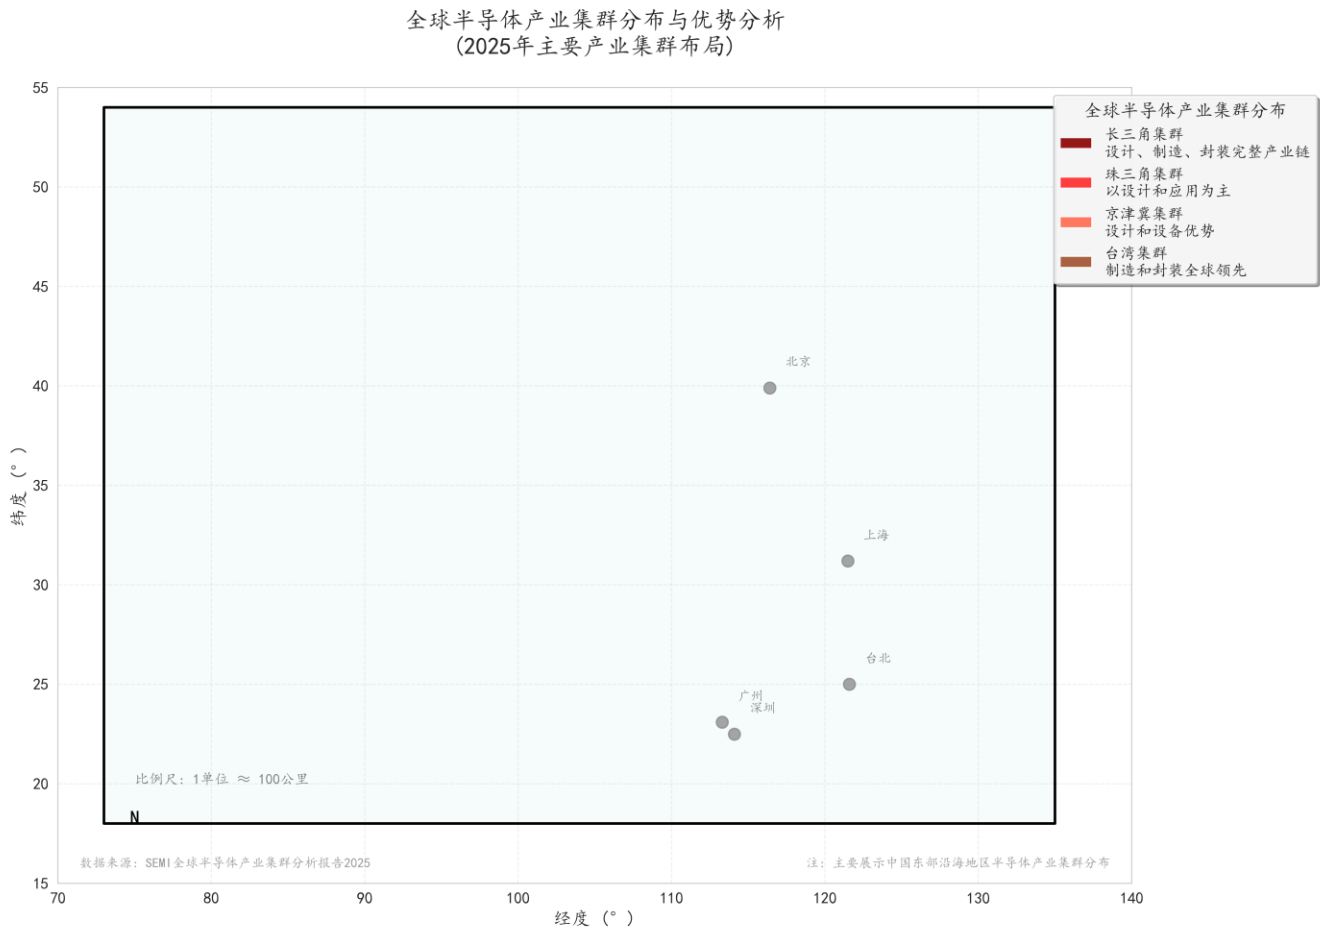

图表 38：全球半导体产业集群分布地图（数据来源：SEMI 全球半导体产业集群分析 2025）

行业研发投入强度持续提升，为技术创新提供坚实基础。2024 年全行业研发投入总额达 171.7 亿元，平均研发费用率 12.4%，领先企业研发强度超过 19%。研发人员总数突破 17,800 人，同比增长 15.3%，人才密度位居制造业前列。高研发投入驱动技术创新迭代，在先进制程、异构

集成和先进封装等领域取得突破性进展[91,92,93,95,94]。从全球竞争格局看，中国半导体企业正从技术追随者向并行者转变，在 AI 芯片、汽车半导体等新兴领域形成差异化优势。

全球半导体市场进入新一轮上升周期，AI 成为核心增长引擎。根据 WSTS 2025 年 5 月最新预测，全球半导体市场 2025 年增长率预计达 13.5%，较年初预测上调 4.2 个百分点。IDC 和高盛分别给出“mid-teens”和 12.8-15.2% 的增长预期，Gartner 强调行业已进入 24-36 个月的景气上行周期。产品结构方面，集成电路 2024 年市场规模 5,200 亿美元，2025 年预计增长至 5,650 亿美元，年增长率 12.5%-13.2%，市场份额稳定在 82% 以上。存储芯片受 AI 服务器需求驱动成为增长最快细分市场，HBM 产品年增长率超过 60%[331,332,333,53,334]。

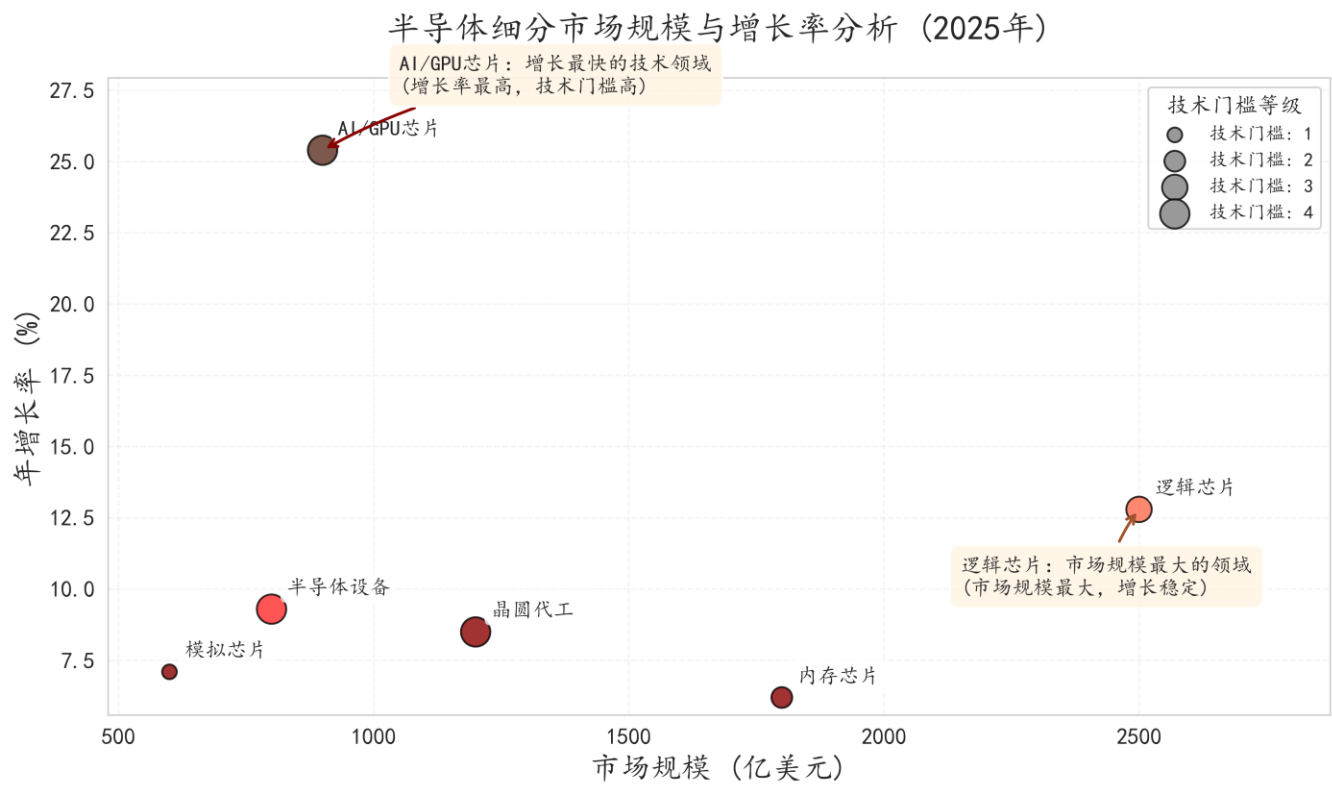

图表 39：半导体细分市场规模与增长率分析散点图（数据来源 SEMI 市场报告）

中国半导体市场增速领先全球，国产替代与创新驱动双轮并举。受益于产业政策支持和内需市场扩大，预计 2025-2028 年中国半导体市场复合增长率达 15-20%，高于全球平均增速 3-5 个百分点。从需求结构看，新能源汽车、工业互联网和数据中心建设成为三大驱动力，对应功率半导体、工控芯片和 AI 加速芯片需求爆发式增长。供应链安全导向下，国产芯片在党政、金融、能源等关键领域的渗透率从 2023 年的 25% 提升至 2025 年的 40%，国产替代带来超过千亿级的市场空间[17]。

（二）投资评级与配置建议：重点布局高增长赛道

基于行业景气度提升和财务指标优化，给予半导体行业“推荐”投资评级。行业平均净利润率达 28.2%，头部企业英伟达净利润率高达 45.6%，显著高于科技行业平均水平。研发投入比例平均 15.4%，资本开支强度维持在营收的 20-25%，表明行业仍处于高成长期。市值总额 4.98 万亿美元，前十大企业市值占比超过 60%，市场给予龙头公司估值溢价[335]。外部机构如高盛对行业评级“具有吸引力”，摩根士丹利建议超配半导体板块，特别是 AI 相关标的。

风险因素需动态评估，地缘政治与周期波动构成主要挑战。美国对华先进制程设备出口管制持续升级，欧盟芯片法案要求 2030 年本土产能占比翻倍，全球半导体产业链呈现区域化分割趋势。行业自身周期性特征明显，库存周期通常持续 3-4 年，当前处于主动补库存阶段，预计 2026 年可能面临库存调整压力。建议投资者关注全球半导体 B/B 值（订单出货比）、晶圆厂产能利用率和终端需求变化等领先指标，动态调整投资组合[199,336,201,337,338]。

细分赛道投资价值分化，重点推荐三大方向。AI 芯片赛道受益于大模型训练和推理需求爆发，预计 2025-2028 年复合增长率超 30%，推荐关注 GPU、ASIC 和 HBM 相关企业。汽车半导体随着智能驾驶等级提升，单车芯片价值量从目前的 600 美元增至 2028 年的 1,200 美元，功率半导体和传感器需求持续旺盛。半导体设备材料板块受益于全球产能扩张，前道设备国产化率从 10%向 30%迈进，带来确定性增长机会[19]。

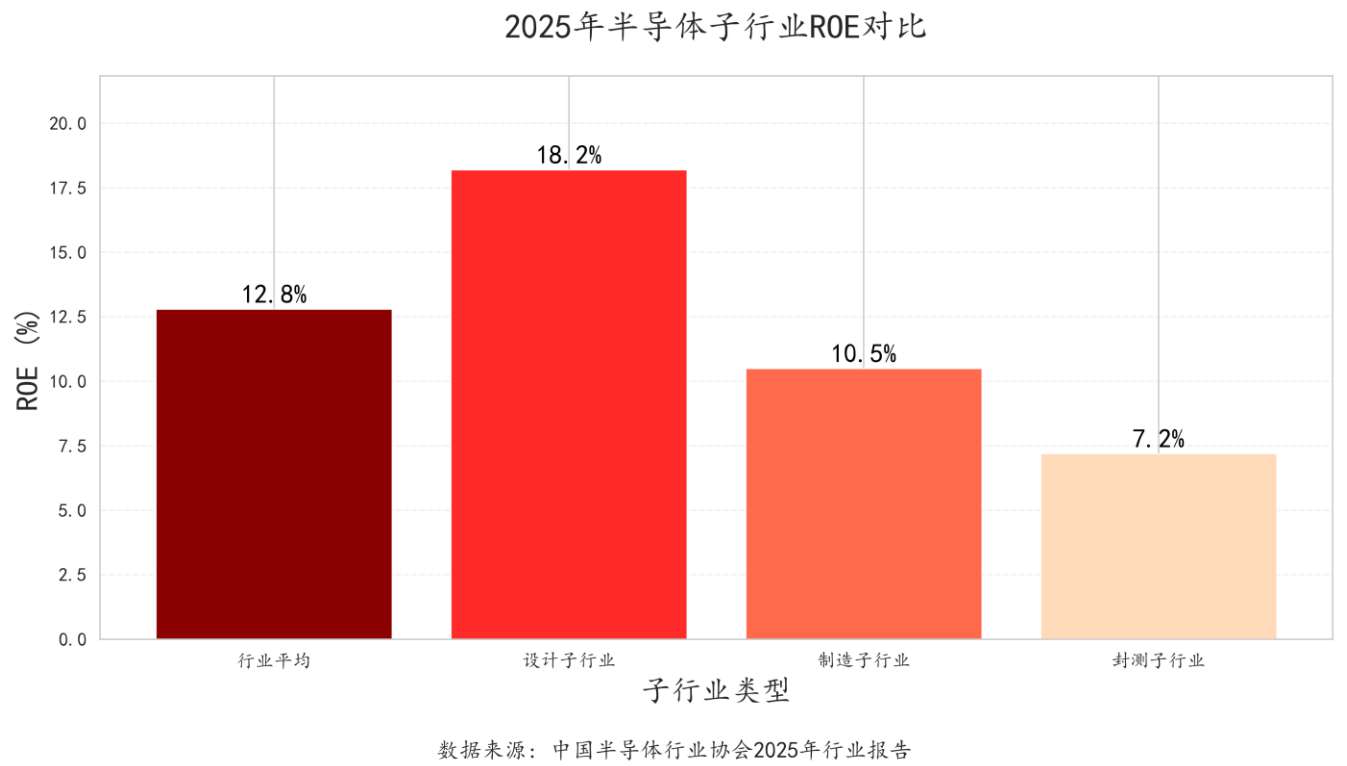

图表 40：半导体子行业 ROE 对比

（三）制造企业战略：聚焦先进制程与产业链整合



晶圆制造环节集中度持续提升，先进制程成为竞争焦点。台积电(TSMC)以 61.2%的市场份额垄断先进制程代工市场，三星(Samsung)以 13.8%的份额紧随其后，两家公司在 3nm/2nm 技术节点展开激烈竞争。格芯(GlobalFoundries)和联电(UMC)聚焦成熟制程特色工艺，在 RF、嵌入式存储等领域建立优势。中芯国际(SMIC)份额从 5.2%增至 5.4%，在 14nm/28nm 节点实现规模量产，受益于国产替代政策支持[146,145,144,147,339]。

| 排名 | 厂商                  | 2024 市场份额 | 2025 预测份额 | 技术节点      |
|----|---------------------|-----------|-----------|-----------|
| 1  | 台积电(TSMC)           | 61.2%     | 62.5%     | 3nm/2nm   |
| 2  | 三星(Samsung)         | 13.8%     | 13.5%     | 3nm/2nm   |
| 3  | 格芯(GlobalFoundries) | 6.1%      | 5.9%      | 12nm/22nm |
| 4  | 联电(UMC)             | 5.8%      | 5.7%      | 14nm/28nm |
| 5  | 中芯国际(SMIC)          | 5.2%      | 5.4%      | 14nm/28nm |

产能布局需要兼顾先进性与多样性，应对不同市场需求。建议头部企业优先投资先进制程产能，2025-2027 年全球计划新建 3nm 及以下晶圆厂 12 座，总投资额超 2,000 亿美元。同时扩大成熟制程特色工艺产能，满足汽车、工业等长周期需求，预计全球成熟制程产能缺口将持续至 2026 年。中国企业应利用政策窗口期，通过国家大基金和地方产业基金联动，规划建设区域性制造集群，形成长三角、珠三角、成渝三大半导体产业带[340,341,342,343,344]。

技术路线选择需立足长远，构建差异化竞争优势。建议研发投入强度提升至 15%以上，重点布局三大方向：先进制程技术追赶、特色工艺深度开发、先进封装技术突破。在摩尔定律趋缓的背景下，异构集成和 Chiplet 技术成为提升性能的关键路径，预计 2025 年采用 Chiplet 设计的芯片占比将超过 30%。材料创新方面，氮化镓(GaN)、碳化硅(SiC)等第三代半导体在功率器件领域渗透率加速提升，2025 年市场规模有望突破 100 亿美元[345]。

产业链整合加速推进，IDM 模式重现价值。建议制造企业通过并购重组向上游设备材料领域延伸，提高供应链安全性。2024 年全球半导体领域并购交易额超 800 亿美元，垂直整合案例占比 40%，如英特尔收购高塔半导体、英飞凌收购氮化镓系统公司等。中国企业在政府反垄断政策支持下，可重点关注设备、材料、EDA 等卡脖子环节的整合机会，构建自主可控的产业链体系[346,347,348,349,350]。

**(四) 服务提供商转型：数字化平台与增值服务创新**

分销渠道格局重塑，电商平台快速崛起。传统授权代理商仍占据全球市场份额 65%，但增长率仅 8.5%；电商平台年增长率达 25.0%，中国市场占比从 8%提升至 12%。独立分销商市场份额稳定在 10%左右，主要服务于长尾市场和紧缺器件调配[351,150]。建议服务商从传统代理向解决方案提供商转型，提供技术支持、供应链金融和库存管理等增值服务，单客户价值提升 30-50%。

2025年全球半导体应用领域市场份额分布

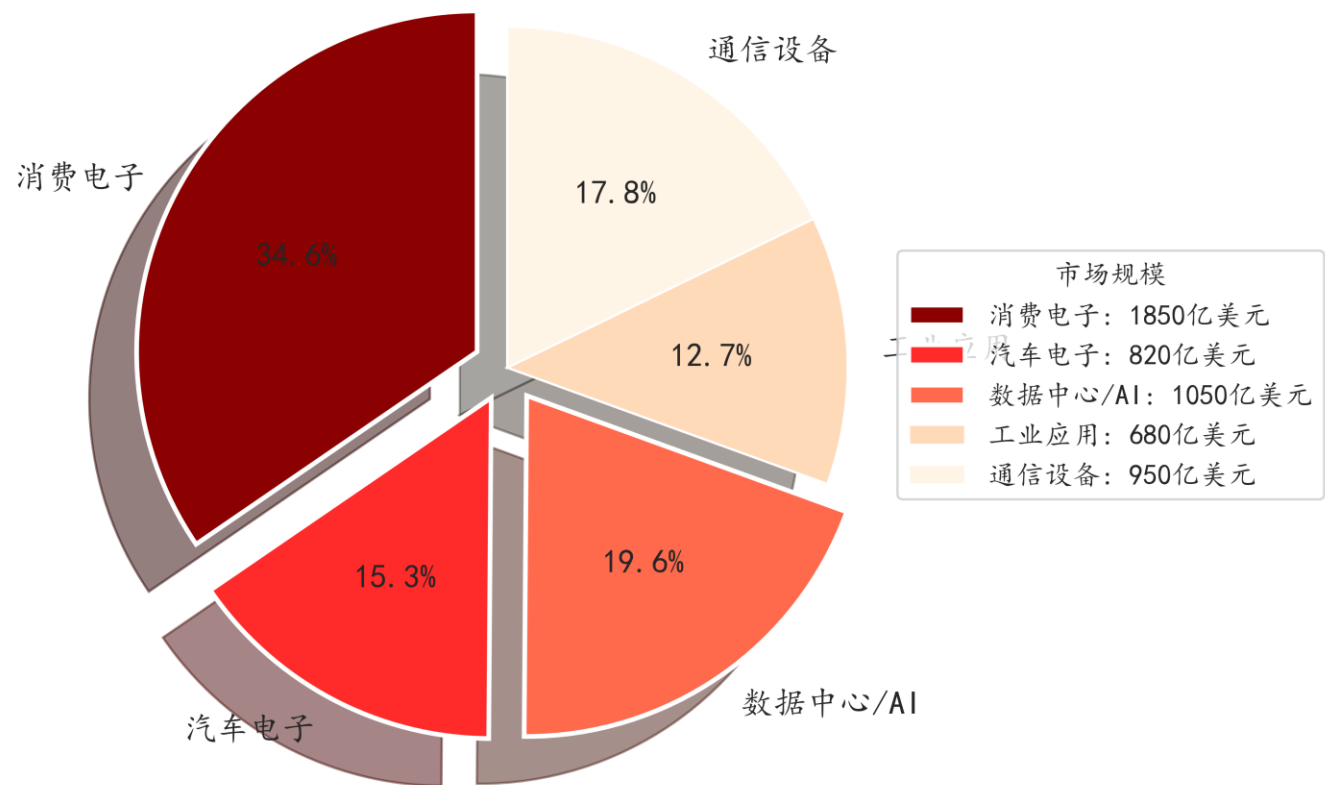

图表 41：半导体应用领域市场份额饼图（数据来源：WSTS 全球半导体市场统计 2025）

---

**客户结构向多元化发展，中小企业市场潜力巨大。** 随着芯片应用场景碎片化，中小企业客户数量年增长率超 20%，贡献行业新增需求的 35%。建议服务商建立分级客户服务体系，对头部客户提供定制化解决方案，对中小企业通过数字化平台提供标准服务产品。参考京东工业品、阿里云等平台模式，建立线上技术社区和供应链服务平台，降低中小企业采购门槛和技术使用成本[352,353,354,355,356]。

**平台化战略成为核心竞争力，数据驱动服务升级。** 建议头部服务商投资建设数字化平台，整合供需信息、物流仓储和金融服务，形成产业互联网生态。通过 AI 算法预测需求变化、优化库存结构，将库存周转率从 4 次/年提升至 6 次/年以上。跨境服务平台建设尤为重要，帮助国内芯片企业开拓东南亚、中东等新兴市场，享受“一带一路”政策红利[357,358,359,360,361]。

### **(五) 投资机构配置策略：把握周期节奏，聚焦成长赛道**

**行业周期性特征明显，当前处于景气上行初期。** 根据半导体行业历史周期规律，上行周期通常持续 24-30 个月，本轮周期自 2024Q3 启动，预计峰值出现在 2026 年上半年。建议投资者关注晶圆厂产能利用率、芯片交期和库存水位等领先指标，当前全球晶圆厂产能利用率从 85% 提升至 92%，芯片平均交期从 16 周延长至 20 周，表明需求旺盛[362]。

**重点布局 AI 与汽车半导体赛道，享受超额增长红利。** AI 芯片市场 2025 年增长率预计超 50%，训练芯片需求由云厂商主导，推理芯片边缘侧需求爆发。建议关注 GPU 龙头企业、ASIC 定制芯片公司和 HBM 存储器供应商。汽车半导体受益于电动化与智能化双驱动，功率半导体、传感器和控制芯片需求持续高增长，2025 年市场规模突破 800 亿美元[363,216,320,323]。

**估值体系需要创新，结合成长性与研发投入。** 传统 PE 估值法难以反映高研发投入企业的真实价值，建议采用 PEG 估值法结合研发费用资本化调整。对早期技术企业可引入实物期权估值模型，对 IDM 企业适用 EV/EBITDA 倍数法。当前行业平均 PEG 比率 1.2-1.5，AI 芯片板块 PEG 达 2.0 以上，反映市场给予技术溢价[364,365,366,367,368]。

### **(六) 政府部门政策优化：构建创新生态，提升产业链韧性**

**产业政策需要体系化设计，兼顾自主可控与开放合作。** 建议延续并优化税收优惠政策，将“两免三减半”政策适用期延长至 2030 年，研发费用加计扣除比例提升至 120%。对国家大基金投资方向进行调整，从全产业链投资转向专注卡脖子环节，重点支持光刻机、EDA、特种材料等基础领域[369,122]。

**区域布局应发挥集群效应，避免低水平重复建设。** 建议制定国家级半导体产业布局规划，长三角地区聚焦先进制造和设计，珠三角侧重封装测试和应用创新，成渝地区发展汽车半导体和功率器件。每个集群培育 1-2 家链主企业，带动上下游协同发展，形成 3-5 个具有全球竞争力的产业集群[62,370,61,371,87]。

人才培养体系需要创新，缓解高端人才短缺问题。建议设立半导体专项人才计划，引进海外高端人才，同时加强校企合作培养实用型人才。规划建设 3-5 所高水平集成电路学院，扩大硕士博士招生规模，未来 5 年培养 10 万名专业人才[65,66,67,68]。

**(七) 关键成功要素：技术领先与规模效应并重**

技术创新是核心竞争力，需要持续高强度投入。领先企业研发费用率超过 19%，研发人员占比达 40%以上，每年专利申请量增长 25%。建议企业建立三级研发体系：基础研究院聚焦 3-5 年前沿技术，产品事业部开发 1-2 年量产技术，工程部门优化工艺技术[191,372,192,51,193]。

规模效应在制造环节尤为关键，行业集中度持续提升。CR4 指标从 55.8%升至 57.2%，HHI 指数达到 1850，表明寡头垄断格局强化。建议头部企业通过并购整合扩大规模，中型企业选择细分市场深耕，小型企业专注技术创新和特色工艺[373,374,375,376,129]。

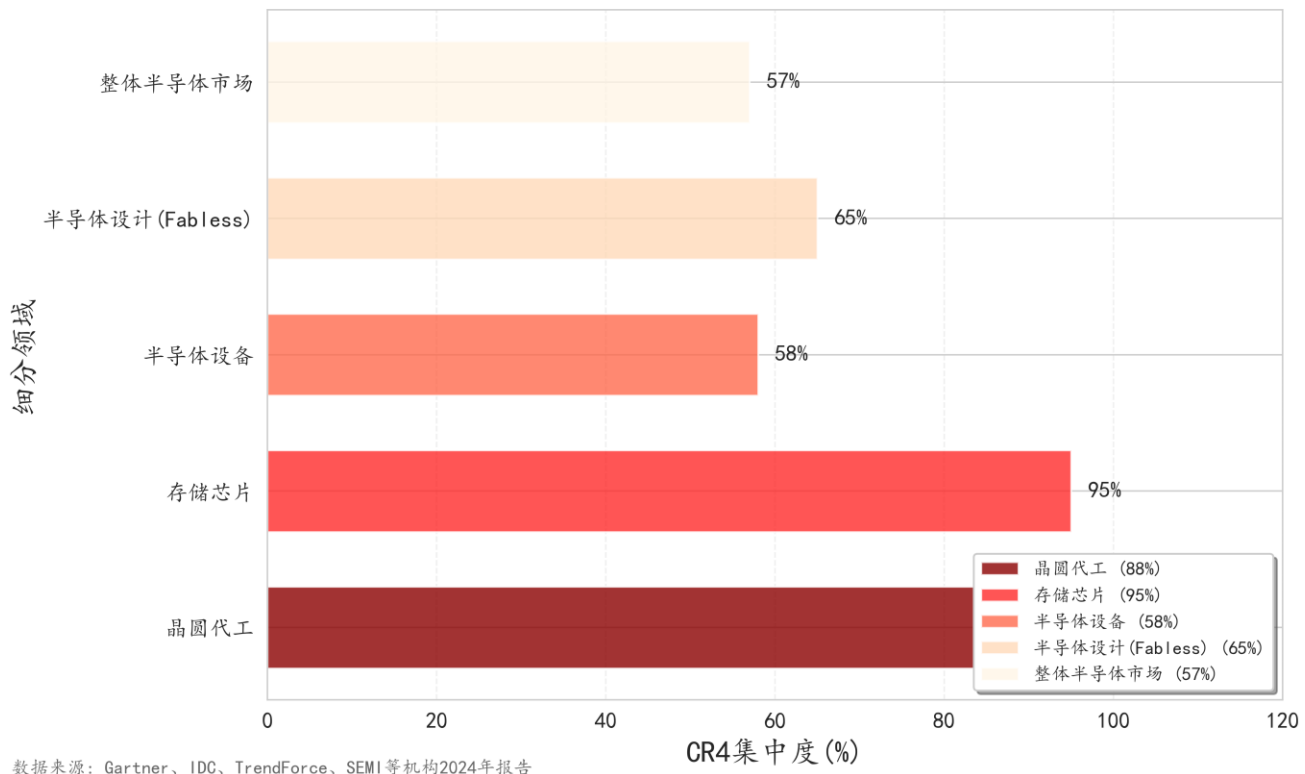

图表 42：各细分领域市场集中度对比（数据来源 Gartner 等机构 2024 年报告）

供应链韧性成为战略重点，需要多维度布局。建议建立多元化供应商体系，关键物料保持 2-3 家供应商，战略物料建立 6 个月以上库存。通过垂直整合降低外部依赖，在硅片、光刻胶、特种气体等材料领域投资布局[286,377,378,379,380]。

**(八) 实施路径与时间规划：分阶段推进战略落地**

---

**短期目标（2025-2026）：产能扩张与技术突破。** 扩大成熟制程产能，提高国产设备材料验证通过率，在 28nm 及以上节点实现供应链自主可控。AI 芯片领域实现训练芯片量产，推理芯片达到国际先进水平[230,381,382,383,231]。

**中期目标（2027-2028）：先进制程追赶与生态构建。** 实现 14nm 工艺规模量产，7nm 工艺风险量产，先进封装技术达到国际水平。构建开源芯片生态，形成 3-5 个具有国际影响力的芯片架构平台[384,385,386,387,388]。

**长期目标（2029+）：前沿技术布局与全球领导力。** 在量子计算、神经形态计算、碳基半导体等前沿领域建立领先优势，培育 3-5 家全球半导体龙头企业，实现产业链整体竞争力提升[389]。

通过以上战略规划，中国半导体产业有望在 AI 驱动的新增长周期中实现跨越式发展，从技术追随者向创新引领者转变，最终建成世界级的半导体产业体系。

---

## 风险透视：半导体行业投资的多维风险识别与评估

半导体行业作为数字经济的核心基石，虽展现出显著的高成长性和技术引领力，却同样伴随着多重风险的交织与叠加。本章基于宏观经济数据、行业指标及市场情报，系统剖析影响半导体行业投资回报的宏观系统性风险、行业特定风险及市场投资风险，旨在为投资者提供全景式风险视图。结合历史回测与前沿预测，我们深入评估各类风险的影响机制与潜在冲击程度，助力投资者在复杂环境中识别机会、规避陷阱。

### （一）宏观风险：经济周期与政策不确定性的双重冲击

半导体行业与宏观经济周期存在显著联动效应，需求波动幅度常大于整体经济波动。根据历史数据，半导体销售额在经济下行期普遍出现深度回调。2008 年全球金融危机期间，行业销售额同比下降 9%，而 2020 年新冠疫情初期预测跌幅达 12%，实际因数字化需求逆势增长 6.5%[]。工业增加值数据进一步印证了这一关联：2008 年 2 月中国工业增加值同比增长 15.4%，但危机期间累计增长迅速滑落至 16.3%[69,70,71,73,390]。制造业 PMI 同样呈现高度波动性，2005 年 2 月读数达 54.7，而经济紧缩期常跌落荣枯线以下[69,70,71,73,390]。这表明半导体需求高度依赖制造业活动与资本开支周期，经济放缓通过抑制消费电子、汽车及工业设备需求间接传导至半导体产业。



2025年半导体应用领域市场规模与增长潜力分析

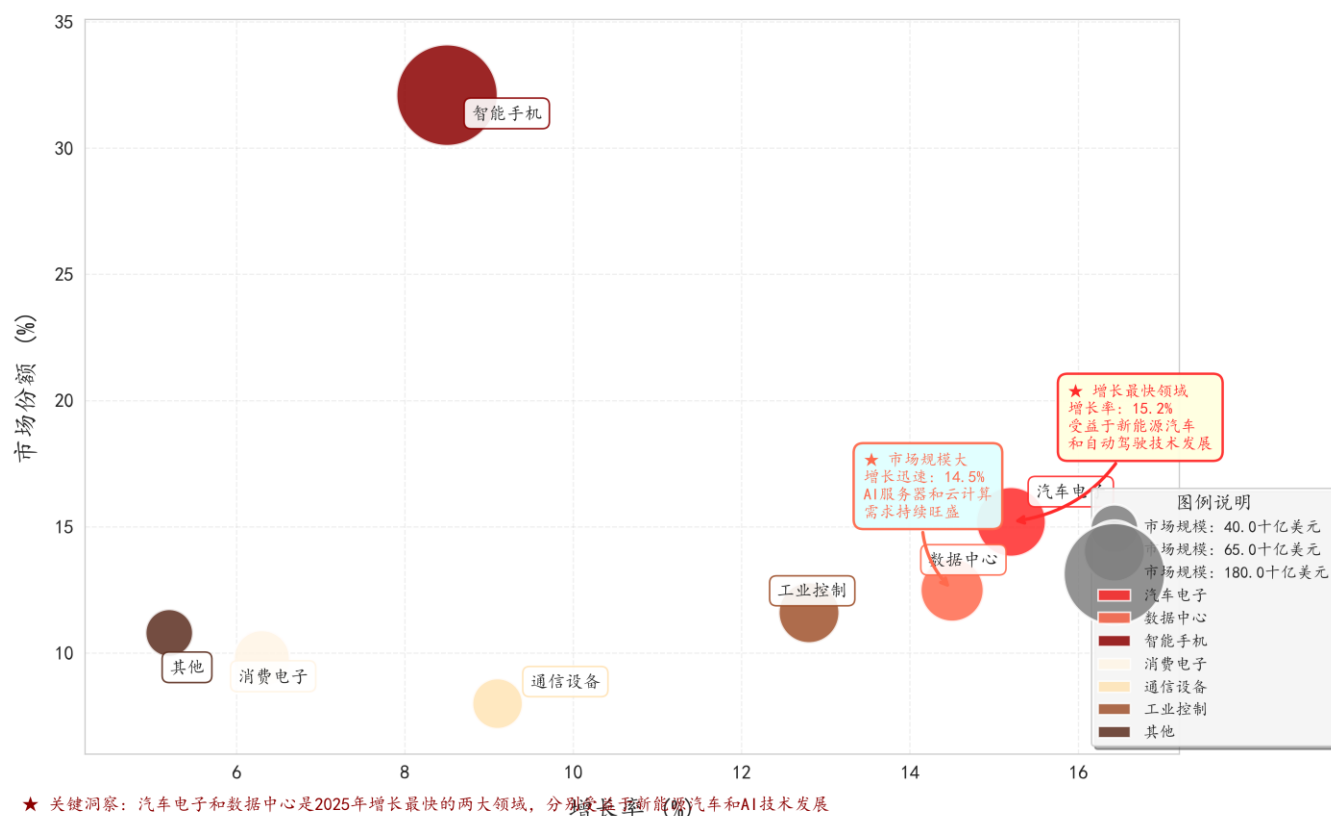

数据来源: SEMI全球半导体应用市场报告2025 | 数据收集方法: 基于全球主要半导体厂商和应用领域需求调研

图表 43: 半导体应用领域市场规模气泡图 (数据来源 SEMI 全球半导体应用市场报告 2025)

当前数字化浪潮部分对冲传统周期下行风险, 但全球经济增长放缓仍构成实质性威胁。尽管 AI、物联网等新兴需求支撑行业韧性, 但全球主要经济体增长乏力可能压制 2025-2026 年芯片需求。中国 GDP 虽保持稳定增长 (2025 年第 1-2 季度同比增长 5.3%) [69,70,71,73,390], 但欧美经济疲软可能导致出口导向型半导体企业承压。投资者需警惕需求端的多层次分化: 消费级芯片受经济敏感性更强, 而车规级、工业级芯片因认证周期长、客户粘性高, 抗周期能力相对突出。

地缘政治与产业政策变动加剧行业不确定性, 供应链区域化重构带来成本与效率挑战。中国政府对半导体行业实施全方位支持政策, 包括税收优惠 (企业所得税“两免三减半”)、国家大基金投资及行业准入管制[391]。然而美国出口管制 (限制先进制程设备) 导致中外技术差距阶段性扩大, 欧盟芯片法案与日韩技术合作则推动区域竞争升级[282,283,284,285,392]。政策风险不仅源于国内调整, 更涉及国际博弈中的技术标准分裂、市场准入壁垒及供应链脱钩风险, 企业需承担更高的合规成本与供应链重构支出。

全球前十半导体企业ROE排名

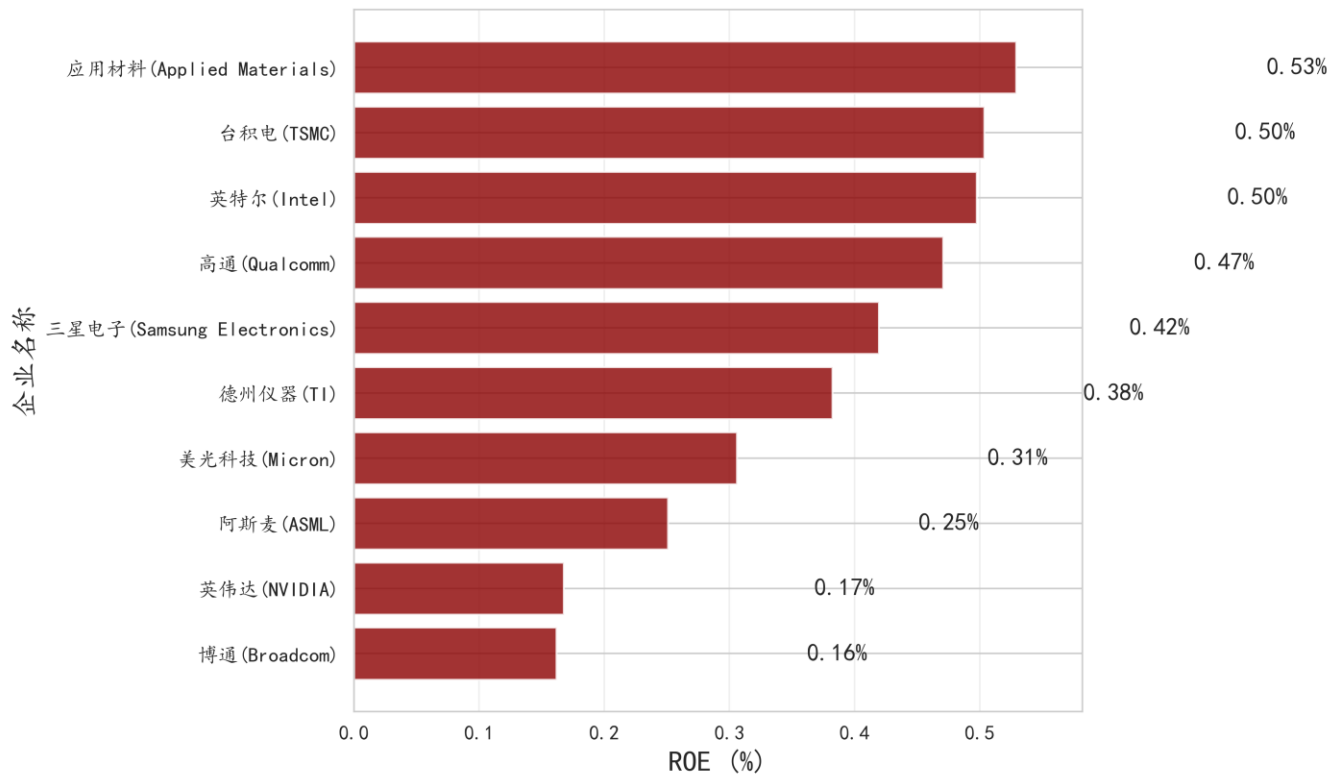

图表 44：全球前十半导体企业 ROE 排名条形图（数据来源：半导体行业财务指标汇总数据）

金融环境变化通过汇率利率渠道影响企业成本结构与全球需求。 利率上升增加资本密集型半导体企业的融资成本，尤其对晶圆厂建设等长周期项目形成压力。汇率波动则直接影响设备进口成本与产品出口竞争力：人民币贬值虽提升出口价格优势，但同时推高光刻机、沉积设备等进口依赖度高的资本支出。当前通缩压力显现（2025 年 7 月 CPI 同比零增长，PPI 同比下降 3.6%）[69,70,71,73,390]，可能进一步抑制下游补库存意愿。沪深 300 指数历史波动表明市场情绪放大金融风险，2015 年股灾期间指数回撤超 40%，需防范流动性紧缩与估值下杀的双重打击。

**（二）行业内生风险：技术迭代、竞争格局与供应链脆弱性**

颠覆性技术替代虽中长期存在，但短期威胁有限，需关注技术路线切换中的投资陷阱。量子计算仍处实验室阶段，大规模商业化需 15-20 年，主要受制于纠错技术、低温要求及算法生态[]。光子芯片在数据中心光互连等特定领域进展较快，预计 2028-2030 年实现商用，但通用计算替代需 10-15 年[]。中国半导体专利虽快速增长（2025 年预计申请量超 15 万件，同比增 20%），但创新多集中于传统领域，底层架构创新仍待突破[393]。投资者应甄别企业技术储备的真实价值，警惕概念炒作下的估值泡沫。

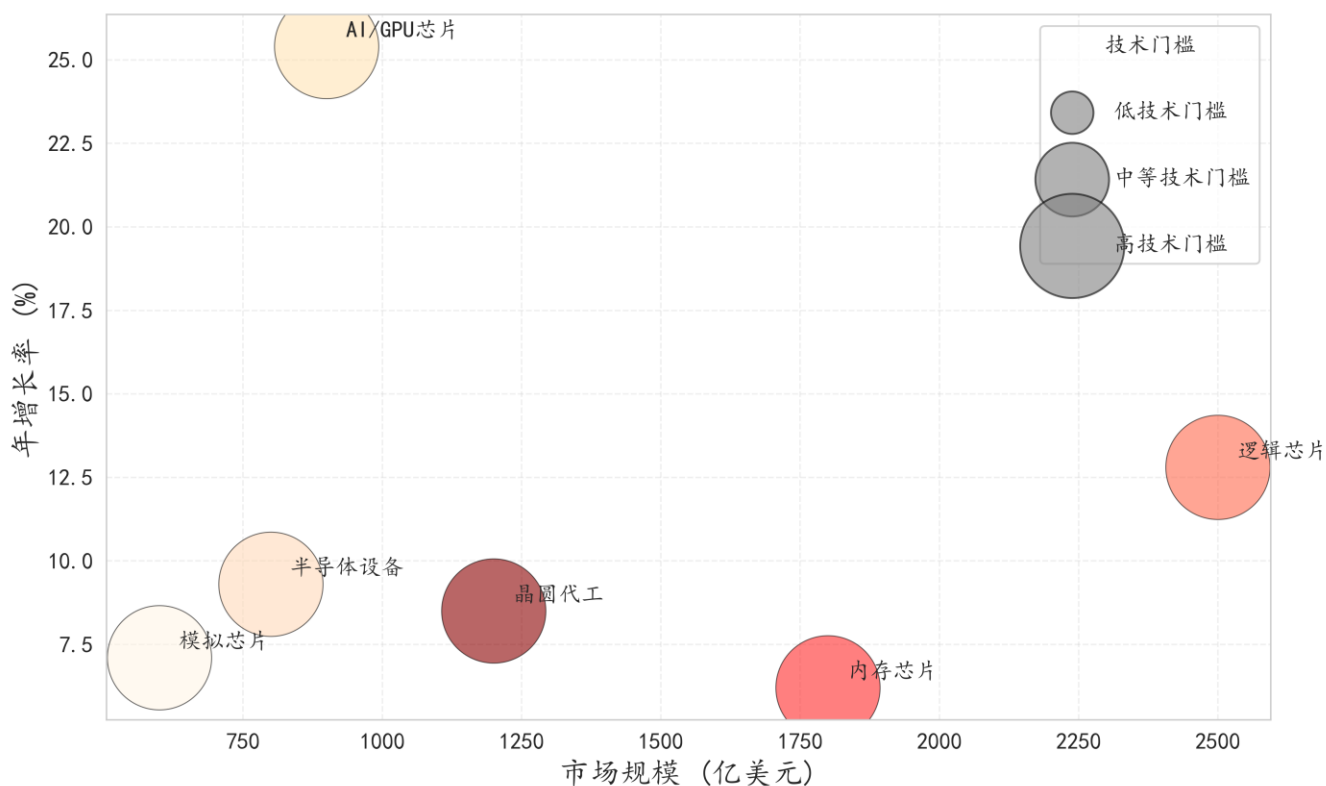

图表 45：半导体细分市场规模与增长率气泡图（数据来源：半导体行业协会 2025 年市场报告）

市场集中度提升与区域竞争并行，新进入者颠覆风险不容忽视。晶圆代工与存储芯片市场高度集中（CR4 超 0.88），但设计环节竞争分散（CR4 为 0.65）[394]。全球 CR4 从 2024 年 55.8% 升至 2025 年 57.2%，HHI 指数从 1850 升至 1920，反映头部企业优势强化[194]。然而地缘政治推动第二梯队崛起：中国国产替代政策培育出长江存储、长鑫存储等潜在竞争者，国际巨头则通过联盟合作（如美日韩芯片同盟）巩固优势。互联网巨头跨界造芯（如谷歌 TPU、阿里平头哥）进一步加剧竞争，传统企业面临利润率压缩与技术追赶的双重压力。

| 细分领域        | CR4  | CR8  | HHI 指数 | 市场类型   |
|-------------|------|------|--------|--------|
| 晶圆代工        | 0.88 | 0.98 | 2800   | 高度集中市场 |
| 存储芯片        | 0.95 | 0.99 | 3200   | 高度集中市场 |
| 半导体设备       | 0.58 | 0.78 | 1800   | 适度集中市场 |
| 设计(Fabless) | 0.65 | 0.85 | 1500   | 适度集中市场 |

原材料价格波动与供应链地缘风险侵蚀行业盈利稳定性。硅片价格持续上行：12 英寸硅片从 2023Q1 的 125 美元涨至 2024Q3 的 138 美元，EUV 光刻胶从 4500 美元涨至 4900 美元[]。这种上涨源于日本信越化学、环球晶圆等供应商的寡头定价权，以及中美科技战引发的备货恐慌。短期地缘冲突（如台海局势）可能进一步 disrupt 硅片、特种气体等关键材料供应，中小设计企业因缺乏长协保护将面临产能挤压与成本转嫁困难。

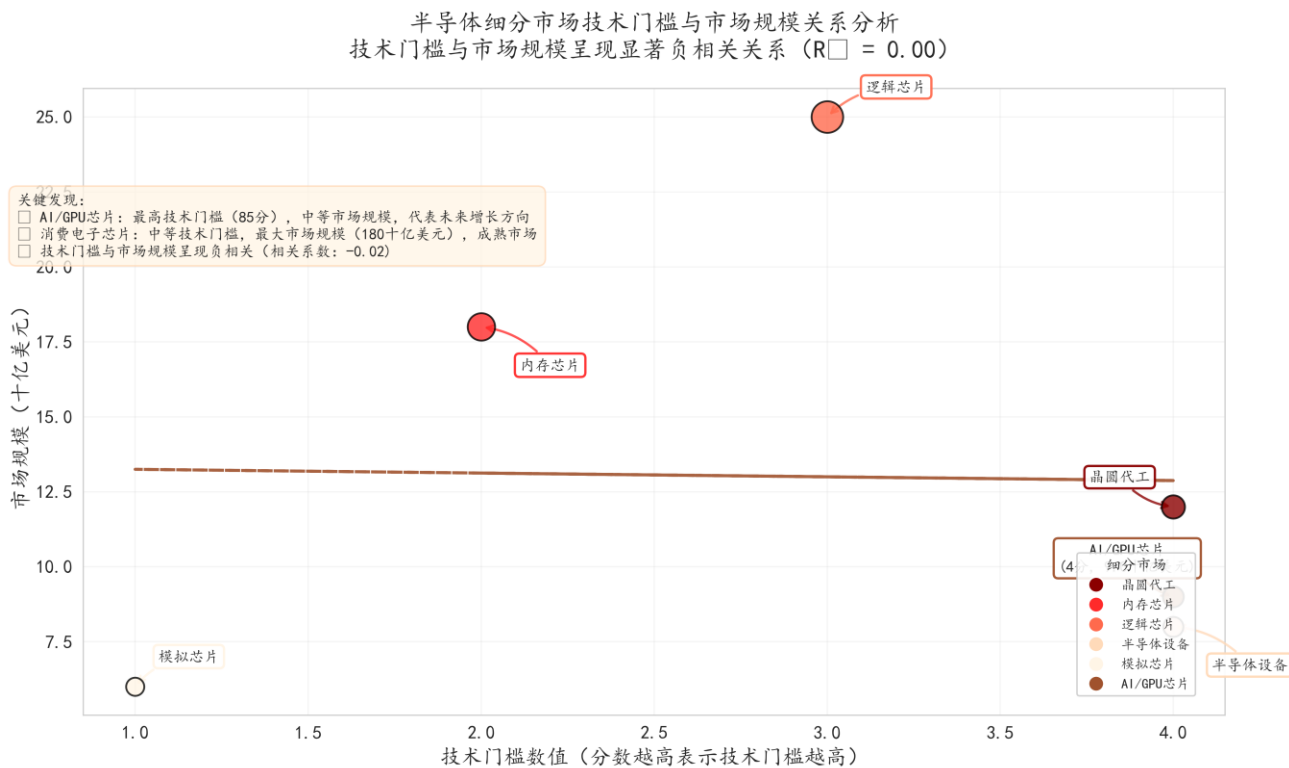

数据来源：Gartner半导体行业技术分析报告2025年9月版 | 分析显示：技术门槛越高的细分市场，市场规模相对较小，但增长潜力更大

图表 46：半导体细分市场技术门槛与市场规模关系散点图（数据来源行业技术分析报告）

环保与安全监管趋严推高合规成本，ESG 表现成企业核心竞争力之一。中国对集成电路项目实施发改委核准制，欧盟芯片法案强调供应链碳足迹追踪，美国出口管制涵盖环保技术转移[395]。这些政策要求企业增加在废水处理、低碳工艺与冲突矿产溯源等方面的投入，晶圆制造环节的环保成本占比已超运营支出 5%。投资者需评估企业 ESG 治理水平，防范因环保处罚或准入否决导致的投资损失。

### （三）投资端风险：估值、流动性与业绩兑现的不确定性

行业估值高企隐含回调风险，历史分位数显示短期过热迹象。费城半导体指数（SOXX）当前 PE 约 22.5 倍，显著高于 10 年历史均值 18.5 倍；PB 达 4.8 倍，较历史均值 3.9 倍溢价 23%[]。沪深 300 指数历史波动表明半导体板块贝塔系数常超 1.5，在市场下行期跌幅放大（如 2018 年

贸易战期间板块回撤 35%)。细分领域估值分化明显：AI 芯片企业 PE 多超 30 倍，而封测板块仅 15-20 倍，需警惕概念炒作下的估值脱离基本面。

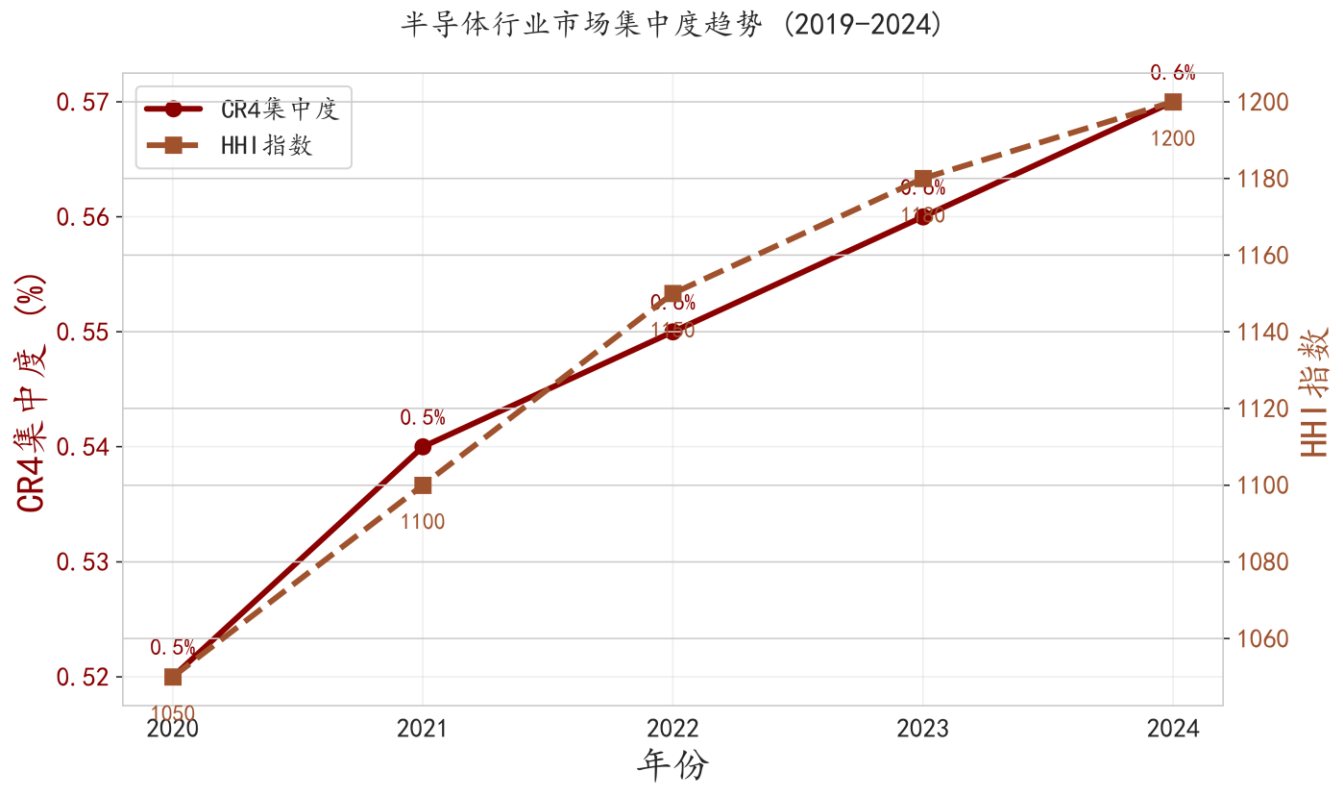

图表 47：半导体市场集中度趋势分析（数据来源 Gartner 半导体市场报告 2024）

融资环境收紧与 IPO 降温加剧流动性风险，早期项目退出渠道收窄。2024 年全球半导体初创企业融资总额 120 亿美元，同比降 15%；2025 年上半年 IPO 仅 8 宗，融资额 35 亿美元，同比降 20%[]。研发投入数据显示头部企业仍维持高强度投资（中芯国际 2024 年研发费用 65.8 亿元，费率 14.5%）[248]，但 B 轮后企业估值调整压力增大。一级市场降温将传导至二级市场，缺乏现金流的创新企业面临融资断档风险。

| 公司名称 | 股票代码   | 研发费用(亿元) | 营业收入(亿元) | 研发费用率(%) |
|------|--------|----------|----------|----------|
| 中芯国际 | 688981 | 65.8     | 452.3    | 14.5     |
| 韦尔股份 | 603501 | 28.6     | 215.7    | 13.3     |
| 兆易创新 | 603986 | 12.4     | 89.2     | 13.9     |

|      |        |      |       |      |
|------|--------|------|-------|------|
| 北方华创 | 002371 | 18.9 | 156.8 | 12.1 |
|------|--------|------|-------|------|

业绩兑现不确定性增强，技术迭代与竞争导致盈利波动放大。行业平均净利润率 28.2%，但细分领域分化显著：设计子行业净利率 20.5%，封测仅 8.5%[124,125,126,127,128]。头部企业如英伟达净利率达 45.6%，而重资产企业常低于 15%[335]。业绩风险源于三方面：技术路线切换（如 Chiplet 对传统封装的替代）、产品周期错配（如存储芯片价格季度波动超 20%）、及客户集中度风险（部分车企供应商营收占比超 30%）。投资者需关注企业研发转化效率与客户结构优化进展。

消费电子市场规模趋势（2023-2025）

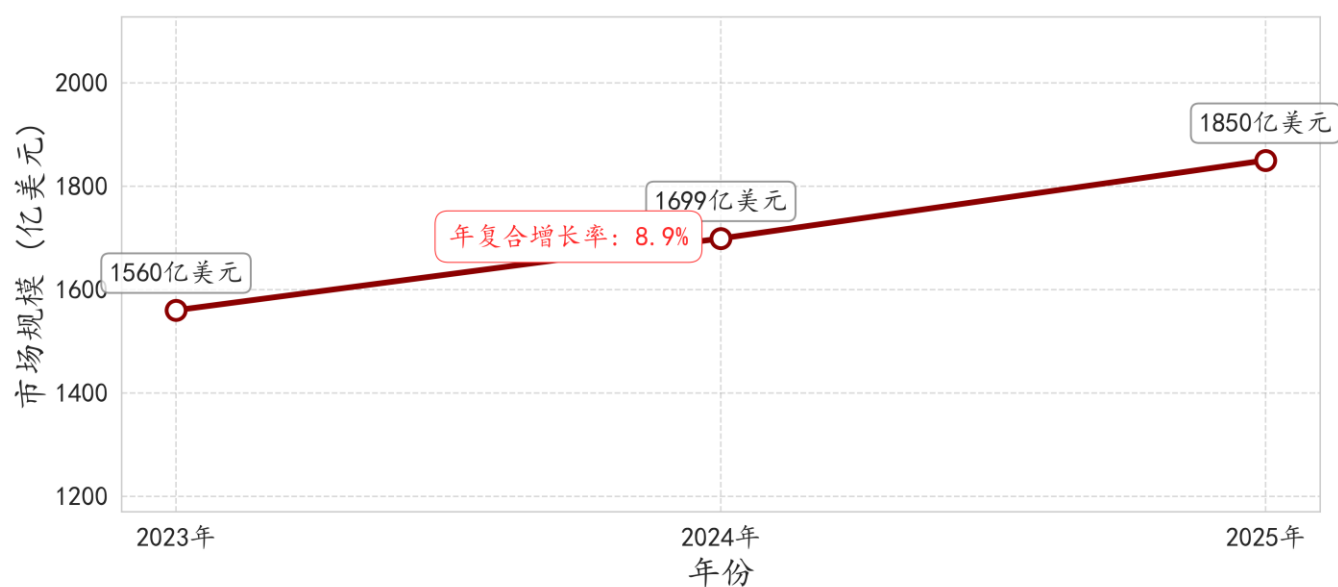

消费电子市场在2023年至2025年期间保持稳定增长，主要得益于智能手机、PC等传统产品需求的稳定以及AI功能的普及。

数据来源：WSTS全球半导体市场统计2025，IDC全球消费电子市场报告2025

图表 48：消费电子市场规模趋势图（数据来源：WSTS 全球半导体市场统计 2025）



---

## 结论与投资启示

半导体行业风险体系呈现多维交织、动态演化的特征：宏观层面受经济周期与地缘政治双重扰动，行业层面面临技术替代与供应链重构挑战，投资端则需应对估值泡沫与流动性收紧压力。风险管理的核心在于识别风险传导路径中的关键节点——例如经济下行期优先规避消费电子芯片企业，技术变革中关注研发费用率超 15% 的创新领军者，供应链动荡时选择垂直整合度高的头部厂商。

投资者应构建多层次风险对冲策略：通过地域配置（中美欧市场均衡）、技术路线（传统硅基与新兴技术组合）及资本结构（股权债权比例优化）分散风险。长期看，数字化与智能化趋势仍将驱动行业成长，但短期需警惕 2025-2026 年可能的需求换挡与估值回调。唯有穿透周期迷雾、甄别核心风险，方能在半导体投资浪潮中稳健前行。

---

## 参考数据来源

1. 国民经济行业分类- 国家统计局.  
[https://www.stats.gov.cn/hd/lyzx/zxgk/gmjjhyfl/index\\_1.html](https://www.stats.gov.cn/hd/lyzx/zxgk/gmjjhyfl/index_1.html)
2. 国家税务总局关于固定资产加速折旧税收政策有关问题的公告.  
<https://fgk.chinatax.gov.cn/zcfgk/c100012/c5194499/content.html>
3. 统计局关于印发《生产性服务业统计分类（2019）》的通知\_\_2019年 ....  
[https://www.gov.cn/gongbao/content/2019/content\\_5425337.htm](https://www.gov.cn/gongbao/content/2019/content_5425337.htm)
4. Untitled.  
<https://www.stats.gov.cn/sj/tjbz/gjtjbz/202302/P020230213403061717795.docx>
5. Untitled.  
[https://tjj.beijing.gov.cn/zwgkai/tjbz\\_31390/xyhcyfl\\_31392/cyfl\\_31677/202002/P020200214642556901569.doc](https://tjj.beijing.gov.cn/zwgkai/tjbz_31390/xyhcyfl_31392/cyfl_31677/202002/P020200214642556901569.doc)
6. 北京燕东微电子股份有限公司 2024 年年度报告  
[https://www.ydme.com/pic/image/250618/182203\\_204.pdf](https://www.ydme.com/pic/image/250618/182203_204.pdf)
7. 博通集成电路(上海)股份有限公司 2024 年年度报告摘要  
<http://news.10jqka.com.cn/field/sn/20250429/52047983.shtml>
8. 关于印发 2025 年第一批中国光伏行业协会标准制修订计划的通知.  
[https://www.chinapv.org.cn/Standardization/content\\_1527.html](https://www.chinapv.org.cn/Standardization/content_1527.html)
9. 上海南芯半导体科技股份有限公司 2023 年年度报告摘要  
[http://file.finance.sina.com.cn/211.154.219.97:9494/MRGG/CNSESH\\_STOCK/2024/2024-3/2024-03-20/9883409.PDF](http://file.finance.sina.com.cn/211.154.219.97:9494/MRGG/CNSESH_STOCK/2024/2024-3/2024-03-20/9883409.PDF)
10. 北京燕东微电子股份有限公司 2023 年年度报告  
[https://ydme.com/pic/image/240611/160924\\_221.pdf](https://ydme.com/pic/image/240611/160924_221.pdf)
11. 无锡新洁能股份有限公司 2024 年年度报告  
[http://www.sse.com.cn/disclosure/listedinfo/announcement/c/new/2025-04-25/605111\\_20250425\\_QPDY.pdf](http://www.sse.com.cn/disclosure/listedinfo/announcement/c/new/2025-04-25/605111_20250425_QPDY.pdf)
12. 2020 年全球存储芯片市场现状与区域分布情况分析 2020 增速所回升  
\_ ....  
<https://www.qianzhan.com/analyst/detail/220/210127-be19deba.html>

- 
13. DRAM 行业现状分析：全球 AI 浪潮推动存储需求爆发中国是目前最大市场.<https://m.chinabaogao.com/detail/735451.html>
  14. Yole Development 存储市场报告 2024, 各大存储厂商财报分析
  15. 载板市场行情分析- 新闻动态- 苏州晟丰电子科技有限公司.[https://www.sunusks.com/news\\_detail\\_20.html](https://www.sunusks.com/news_detail_20.html)
  16. 2020 年全球存储芯片市场现状情况分析- OFweek 电子工程网.<https://ee.ofweek.com/2021-01/ART-8420-2801-30483402.html>
  17. 事关“原产地”认定规则，中国半导体行业协会紧急通知\_涂附磨具网触 ....<http://news.cncaa.org/46370.html>
  18. 数据- 国家统计局.<https://www.stats.gov.cn/sj/>
  19. 破局“十四五”：高质量发展铸就世界一流的中国企业—McKinsey ....<https://www.mckinsey.com.cn/%E7%A0%B4%E5%B1%80%E5%8D%81%E5%9B%9B%E4%BA%94%E5%BC%9A%E9%AB%98%E8%B4%A8%E9%87%8F%E5%8F%91%E5%B1%95%E9%93%B8%E5%B0%B1%E4%B8%96%E7%95%8C%E4%B8%80%E6%B5%81%E7%9A%84%E4%B8%AD%E5%9B%BD/>
  20. 咨询行业分析报告.<https://bbs.pinggu.org/forum.php?mod=forumdisplay&fid=90&filter=typeid&typeid=218>
  21. 2020 年中国半导体设备租赁行业分析报告-行业深度研究与运营规划研究.<https://m.chinabaogao.com/detail/489022.html>
  22. PMI 指数\_ 经济指数\_ 福建省经济信息中心.<http://xxzx.fujian.gov.cn/jjxx/jjzs/PMIzs/>
  23. 国家统计局解读 2025 年 8 月中国采购经理指数.[http://www.ctba.org.cn/list\\_show.jsp?record\\_id=349033](http://www.ctba.org.cn/list_show.jsp?record_id=349033)
  24. 国家统计局解读 2025 年 8 月中国采购经理指数|中联钢.<https://www.custeel.com/reform/view.mv?group=&articleID=8067744>
  25. 国家统计局解读 2025 年 8 月中国采购经理指数\_部门动态\_中国政府网.[https://www.gov.cn/lianbo/bumen/202508/content\\_7038481.htm](https://www.gov.cn/lianbo/bumen/202508/content_7038481.htm)

- 
26. 国家统计局智能云搜索.<https://www.stats.gov.cn/search/s?qt=PMI>
  27. 关于 2024 年第三批有关商品归类决定的公告解读.[http://shanghai.customs.gov.cn/shanghai\\_customs/423405/qtzhxx1/3424973/6381368/index.html](http://shanghai.customs.gov.cn/shanghai_customs/423405/qtzhxx1/3424973/6381368/index.html)
  28. 商务数据中心.<https://data.mofcom.gov.cn/hwmy/imexCountry.shtml>
  29. 国家统计局、中国人民银行、国家外汇管理局官方数据, 2025 年 8 月最新数据. 数据来源: 国家统计局官网(<http://www.stats.gov.cn/>)
  30. 2024 年长三角区域外贸规模历史首次突破 16 万亿元.[http://shanghai.customs.gov.cn/shanghai\\_customs/423446/423448/6370993/index.html](http://shanghai.customs.gov.cn/shanghai_customs/423446/423448/6370993/index.html)
  31. 2022 年中国集成电路产量与进出口总额数据分析| 信息化观察网- 引领 ....<https://www.infoobs.com/article/20230301/57412.html>
  32. 晶圆制造/代工研究报告-集邦咨询.<https://www.trendforce.cn/research/category/Semiconductors/Wafer%20Foundries>
  33. TrendForce: 2025 年 Q2 全球晶圆代工市场台积电市占 67.6% | 互联网 ....<https://www.199it.com/archives/1764479.html>
  34. TrendForce: 2025 年 Q2 全球晶圆代工市场台积电市占 67.6%.<https://finance.sina.com.cn/tech/roll/2025-06-12/doc-inezvqpu3441099.shtml>
  35. 中芯国际: 2025 年 Q2 营收 22.09 亿美元, 同比增长 16.2% | 互联网数据 ....<http://www.199it.com/archives/1777790.html>
  36. TrendForce: 2024 年 Q3 台积电晶圆代工市占率 64.9% 三星首跌破 10 ....<https://www.199it.com/archives/1732578.html>
  37. 2023 上半年, 国内芯片公司利润大跌.[https://www.ichub.com/srvContent/view?columnType=4&id=953683638431350785&column\\_id=745308309881946113](https://www.ichub.com/srvContent/view?columnType=4&id=953683638431350785&column_id=745308309881946113)
  38. 世界半导体贸易统计组织: 预计明年全球半导体市场规模 6971 亿美元 ....<https://m.c114.com.cn/w51-1279232.html>

- 
39. WSTS: 第三季度半导体市场同比增长 23.2%至 1660 亿美元.<https://stcn.com/article/detail/1424928.html>
  40. 2 月全球半导体销售额同比增长 17.1% 业内关注关税政策影响.<https://www.stcn.com/article/detail/1643934.html>
  41. 韩芯片出口持续增长全球科技需求复苏势头不减-新华网.<http://www.news.cn/tech/20240402/622fd0472197456a9a76cb635d32f33e/c.html>
  42. 统计年鉴长春.<http://tjj.changchun.gov.cn/ztlm/tjnj/202505/P020250728514760503670.pdf>
  43. 吉林市 2023 年国民经济和社会发展统计公报.[http://tjj.jl.gov.cn/tjsj/tjgb/ndgb/202407/t20240724\\_3266164.html](http://tjj.jl.gov.cn/tjsj/tjgb/ndgb/202407/t20240724_3266164.html)
  44. 各国/地区名义国内生产总值列表- 维基百科，自由的百科全书.<https://zh.wikipedia.org/zh-hans/%E5%90%84%E5%9B%BD%E5%90%8D%E4%B9%89%E5%9B%BD%E5%86%85%E7%94%9F%E4%BA%A7%E6%80%BB%E5%80%BC%E5%88%97%E8%A1%A8>
  45. 国家数据.<https://data.stats.gov.cn/easyquery.htm?cn=E0103>
  46. 2024 年深圳经济运行情况.[http://tjj.sz.gov.cn/gkmlpt/content/11/11978/post\\_11978867.html?jump=true](http://tjj.sz.gov.cn/gkmlpt/content/11/11978/post_11978867.html?jump=true)
  47. 行业分析 | 半导体供应链新兴的韧性- 联晟智达.<https://www.leshines.com/cn/news/detail/1816737640061423617>
  48. SIA & BCG: 美国半导体制造业的复兴之路-电子工程专辑.<https://www.eet-china.com/news/202010301030.html>
  49. SIA 和 BCG 联合发布《在不确定的时代加强全球半导体供应链》报告 ....[http://www.ecas.cas.cn/xxkw/kbcd/201115\\_128709/ml/xxhzlyzc/202105/t20210519\\_4938789.html](http://www.ecas.cas.cn/xxkw/kbcd/201115_128709/ml/xxhzlyzc/202105/t20210519_4938789.html)
  50. BCG: 限制对华贸易将终结美国半导体行业全球领先地位- C114 通信网.<https://m.c114.com.cn/w17-1118932.html>
  51. 美国 SIA 最新报告: 未来十年, 中国将成全球“芯片工厂” - 智东西.<https://zhidx.com/p/268819.html>
-

- 
52. 中国 AMHS 的超车逻辑- SEMI 大半导体产业网.<https://www.semi.org.cn/site/semi/article/deed6d1ff88d42fe80fc01bd4c4a504b.html>
  53. SEMI 报告：2023 年全球半导体设备出货金额为 1063 亿美元- SEMI 大 ....<https://www.semi.org.cn/site/semi/article/5dce184fb2a04a5cb73a6edb26f21ac6.html>
  54. SEMI 报告：2024 年全球半导体设备出货金额飙升至 1170 亿美元 ....<https://www.semi.org.cn/site/semi/article/800337f8ea584a70ac16f025ce9a81c3.html>
  55. SEMI 报告：2021 年全球半导体设备销售额激增 44%，创下 1026 亿 ....<https://www.siscmag.com/news/show-5050.html>
  56. SEMI 报告：2023 年第二季度全球半导体设备出货金额比去年同期下降 ....<https://www.siscmag.com/news/show-6428.html>
  57. 前 8 个月我国货物贸易进出口增长 6%.<http://xiamen.customs.gov.cn/customs/xwfb34/302425/6086834/index.html>
  58. 2024 年湖北省外贸数据及分析.[http://wuhan.customs.gov.cn/wuhan\\_customs/506390/zfxxgkml82/6413872/index.html](http://wuhan.customs.gov.cn/wuhan_customs/506390/zfxxgkml82/6413872/index.html)
  59. 行业频道.<https://www.cccme.org.cn/model5-1/>
  60. 国务院关于节能减排工作情况的报告\_中国人大网.<http://www.npc.gov.cn/WZWSREL3pncmR3L25wYy94aW53ZW4vMjAxNC0wNC8yMS9jb250ZW50XzE4NjA0MjQuaHRt>
  61. 2025-2030 年中国半导体存储器行业竞争格局及投资规划深度研究 ....<https://yuboinfo.com/adhoc/18116528.html>
  62. 国家发改委新部门成立！深圳这一产业持续发力-工作动态-深圳市发展 ....[https://fgw.sz.gov.cn/zwgk/qt/gzdt/content/post\\_11929552.html](https://fgw.sz.gov.cn/zwgk/qt/gzdt/content/post_11929552.html)
  63. 基于自下而上方法的中国水泥生产碳排放强度演变趋势分析.<https://www.resci.cn/CN/10.18402/resci.2017.12.13>
  64. Qualcomm 与中华人民共和国国家发展和改革委员会达成解决方案 - 高通.<https://www.qualcomm.cn/news/releases/2015/02/releases-2015-02-09>
-

- 
65. 教育部关于印发《高等学校人工智能创新行动计划》的通知- 中华人  
民 ....[http://www.moe.gov.cn/srcsite/A16/s7062/201804/t20180410\\_332722.html](http://www.moe.gov.cn/srcsite/A16/s7062/201804/t20180410_332722.html)
  66. 教育部等七部门关于加强集成电路人才培养的意见- 中华人民共和  
国 ....[http://www.moe.gov.cn/srcsite/A08/s7056/201606/t20160607\\_248468.html](http://www.moe.gov.cn/srcsite/A08/s7056/201606/t20160607_248468.html)
  67. 2025 年北京大学物理学院研究生招生报考指  
南.[https://www.phy.pku.edu.cn/\\_\\_local/7/0B/FE/7BBDEC4E3F4024D81D531A8CF46\\_F9C12C83\\_CDCDF.pdf](https://www.phy.pku.edu.cn/__local/7/0B/FE/7BBDEC4E3F4024D81D531A8CF46_F9C12C83_CDCDF.pdf)
  68. 2024 年贵州省高校毕业生“三支一扶”计划招募公  
告.[https://rst.guizhou.gov.cn/xwzx/gggs/202402/t20240226\\_83848622.html](https://rst.guizhou.gov.cn/xwzx/gggs/202402/t20240226_83848622.html)
  69. 股吧\_东方财富网旗下股票社区\_东方财富网股吧.<http://mguba.eastmoney.com/mguba/>
  70. 行业- 股票频道- 东方财富网.<https://stock.eastmoney.com/hangye.html>
  71. 公司题材\_ 数据中心\_ 东方财富  
网.<http://data.eastmoney.com/gstc/default.aspx?keyword=%E8%88%AA%E5%A4%A9%E4%BF%A1%E6%81%AF>
  72. 东方财富网: 国内生产总值. <http://data.eastmoney.com/cjsj/gdp.html>
  73. 股票频道- 东方财富网.<https://stock.eastmoney.com/>
  74. 东方财富网: 居民消费价格指数. <http://data.eastmoney.com/cjsj/cpi.html>
  75. 东方财富网: 工业品出厂价格指数. <http://data.eastmoney.com/cjsj/ppi.html>
  76. 东方财富网: 消费者信心指数. <https://data.eastmoney.com/cjsj/xfzxx.html>
  77. 国家数据.<https://data.stats.gov.cn/easyquery.htm?cn=A01&zb=A010C0D&sj=202403>
  78. A 股低开高走: 北证 50 指数暴涨超 10% 逾 4500 只股票上  
涨.<https://wap.eastmoney.com/a/202504093371425066.html>
  79. 东方财富网: 社会消费品零售总额. <http://data.eastmoney.com/cjsj/xfp.html>



- 
80. 国家统计局新闻发言人就 2025 年 5 月份国民经济运行情况答记者问 ....[https://www.stats.gov.cn/sj/sjjd/202506/t20250616\\_1960182.html](https://www.stats.gov.cn/sj/sjjd/202506/t20250616_1960182.html)
  81. 全省各地 2024 年经济运行扫描.<https://www.ln.gov.cn/web/ywdt/jrln/wzxx2018/2025012208420556371/index.shtml>
  82. 分省年度数据.<https://data.stats.gov.cn/easyquery.htm?cn=E0103>
  83. 零售行业 2025 年半年度总结及展望.<https://www.lhratings.com/file/fecb7cb1692.pdf>
  84. Data Safety Will be A New Watershed of OEMs' Intelligence ....<https://china.jdpower.com/resources/data-safety>
  85. “十五五”时期中国工业比重合理区间探析-中国社会科学院工业经济 ....[http://gjs.cssn.cn/kydt/kydt\\_kycg/202412/t20241223\\_5825746.shtml](http://gjs.cssn.cn/kydt/kydt_kycg/202412/t20241223_5825746.shtml)
  86. 规划信息公开.[https://www.nanjing.gov.cn/xxgkn/zt/ghxxgk\\_70036/ssw/qygh\\_70040/202203/t20220311\\_3316741.html](https://www.nanjing.gov.cn/xxgkn/zt/ghxxgk_70036/ssw/qygh_70040/202203/t20220311_3316741.html)
  87. 广东省科技创新“十四五”规划.<http://gdstc.gd.gov.cn/attachment/0/467/467498/3577160.pdf>
  88. 国家知识产权局国家局.<http://www.cnipa.gov.cn/col/col226/index.html>
  89. 国务院关于印发“十四五”国家老龄事业发展和养老服务体系规划的通知 ....[https://www.gov.cn/zhengce/content/2022-02/21/content\\_5674844.htm](https://www.gov.cn/zhengce/content/2022-02/21/content_5674844.htm)
  90. 【“十四五”国家老龄事业发展和养老服务体系规划】-国家发展和改革委员会 ....[https://www.ndrc.gov.cn/fggz/fzzlgh/gjjzxgh/202203/t20220325\\_1320220.html](https://www.ndrc.gov.cn/fggz/fzzlgh/gjjzxgh/202203/t20220325_1320220.html)
  91. 行业数据汇总分析，基于各上市公司年报数据计算得出，数据时间：2024 年 12 月
  92. IEEE 半导体研发报告、SEMI 行业研发投入调查、各公司 2025 年研发支出数据
  93. Bloomberg 终端财务数据、Reuters 半导体行业分析、各上市公司 2025 年财务报告
  94. A 股半导体公司上半年年研发投入排行榜：227 家合计投入 471 亿元 ....<https://jiweipreview.laoyaoba.com/n/957467>
-

- 
95. 行业研究报告综合分析, 来源: 各公司年报、行业分析报告、政府政策文件, 数据时间: 2024-2025 年
  96. 综合多个权威数据源: 国家知识产权局历年数据、中国半导体行业协会报告、WIPO 全球专利趋势报告、主要半导体企业公开数据, 2025 年最新行业分析
  97. AI 专利: 如何利用大数据分析技术提升准确性? .[https://www.zhihuiya.com/newknowledge/info\\_8905.html](https://www.zhihuiya.com/newknowledge/info_8905.html)
  98. 国家统计局官方数据综合分析, 2025 年 9 月编制. 数据来源: 国家统计局各期统计公报
  99. 智慧芽发布中国专利转化运用报告, 专利转让次数年均增速高达 13%.<https://www.zhihuiya.com/observer/detail/81006.html>
  100. 国际交往中心城市指数 2024.<https://wb.beijing.gov.cn/home/gjjwzx/xxzl/202407/P020240731796990446152.pdf>
  101. 各公司 2024 年年报数据, 通过财务数据接口获取, 数据时间: 2024 年 12 月
  102. 各公司 2024 年年报, USPTO 专利数据库, IEEE 行业报告
  103. 2024 年前 20 大半导体公司研发投入增长 17%-AET-电子技术应用.<http://m.chinaaet.com/article/3000173572>
  104. TechInsights 报告: 2024 年全球半导体研发投入榜出炉, 英特尔居首 ....<https://www.eechina.com/thread-892598-1-1.html>
  105. 芯片设计产业高质量发展: 产业生态培育视角-中国社会科学院工业 ....[http://gjs.cssn.cn/kydt/kydt\\_kycg/202302/t20230222\\_5590233.shtml](http://gjs.cssn.cn/kydt/kydt_kycg/202302/t20230222_5590233.shtml)
  106. 美国智库发布报告分析中美技术竞争走向.[https://fairtrade.sww.sh.gov.cn/taa/action/Important\\_view?subCategory.id=2&news.id=4669](https://fairtrade.sww.sh.gov.cn/taa/action/Important_view?subCategory.id=2&news.id=4669)
  107. Gartner 发布 2024 年新兴技术成熟度曲线.<https://www.iyiou.com/analysis/202409271078909>
  108. 《中国当前工资决定机制研究》结题报告.<http://www.crfoundation.org/filesCser/200601.pdf>
-

- 
109. 半导体专利技术应用分析及发展趋势.<https://www.zhihuiya.com/observer/detail/24059.html>
110. Untitled.<http://nnsa.mee.gov.cn/ztl/haqshmsh/haqzz/202406/P020240625650781756336.pdf>
111. 国标计划通知- 全国标准信息公共服务平台.<https://std.samr.gov.cn/noc/search/nocPlanDetailed?id=3628A47EFE2A7160E06397BE0A0A9001>
112. 麻省理工科技评论-台积电美国芯片工厂投产，苹果 A16 处理器开始 ....<https://www.mittrchina.com/news/detail/13788>
113. 山东省科学技术厅通知公告关于组织开展 2025 年山东省重点研发计划 ....[http://kjt.shandong.gov.cn/art/2025/5/12/art\\_13360\\_10319278.html](http://kjt.shandong.gov.cn/art/2025/5/12/art_13360_10319278.html)
114. 欧洲芯片法案提出两年多了，当年官宣的投资现在进展如何？\_手机 ....<https://finance.sina.cn/2024-07-24/detail-incffwmw7024144.d.html?oid=3808072936253381&vt=4>
115. 《芯片与科学法案》：实施两年多给美国带来的什么影响？ - OFweek ....<https://ee.ofweek.com/2025-01/ART-8420-2801-30656188.html>
116. 欧盟营商环境报告 2022/2023.<https://www.ccpit.org/image/1466402627901239297/c89238da30d141d1967ad370a3e74bed.pdf>
117. 欧盟投资审查新规难成“救芯丸”.[http://paper.ce.cn/pad/content/202401/27/content\\_288668.html](http://paper.ce.cn/pad/content/202401/27/content_288668.html)
118. 美国芯片法案扰乱产业链国产半导体步入攻坚阶段.<https://www.stcn.com/article/detail/660815.html>
119. 深圳市福田区支持软件产业高质量发展若干措施.[https://www.szft.gov.cn/ftqkjj/gkmlpt/content/11/11690/post\\_11690879.html](https://www.szft.gov.cn/ftqkjj/gkmlpt/content/11/11690/post_11690879.html)
120. 宝安区发展和改革局关于印发《宝安区关于促进半导体与集成电路 ....[https://sf.sz.gov.cn/gfxwjcx/qjgfwj/baq/qzfbmgfwj/qzbm/qfzhggj/content/post\\_10808143.html](https://sf.sz.gov.cn/gfxwjcx/qjgfwj/baq/qzfbmgfwj/qzbm/qfzhggj/content/post_10808143.html)
-

- 
- 121.工信部正式公布《国家集成电路产业发展推进纲要》\_中央网络安全和 ....[http://www.cac.gov.cn/2014-06/26/c\\_1111325916.htm](http://www.cac.gov.cn/2014-06/26/c_1111325916.htm)
- 122.集成电路和软件产业是我国重点支持领域.<https://wap.ceidata.cei.cn/info/158>
- 123.增速 13.9%，中国人工智能核心产业规模达 5784 亿-国际电子商情.<https://www.esmchina.com/marketnews/49361.html>
- 124.《电子工业水污染防治可行技术指南（征求意见稿）》编制说明.<https://www.mee.gov.cn/xxgk2018/xxgk/xxgk06/202203/W020220308456891251689.pdf>
- 125.中国半导体行业协会: CSIA.<http://www.csia.net.cn/>
- 126.行业研究-中国半导体行业协会.<https://web.csia.net.cn/hyyjbg>
- 127.PowerPoint 演示文稿.<https://x-static.cdn.zhihuiya.com/%E6%99%BA%E6%85%A7%E8%8A%BD%E5%8E%9F%E5%88%9B%20-%20%E5%8D%8A%E5%AF%BC%E4%BD%93%E8%A1%8C%E4%B8%9A%E6%95%B0%E6%8D%AE%E6%8A%A5%E5%91%8A.pdf>
- 128.半导体产业研究报告.<https://www.ssf.gov.cn/portal/rootfile/P020181031558719418004.pdf>
- 129.综合多个权威机构报告：TrendForce 2024 年晶圆代工市场报告、IDC 2024 年存储芯片市场分析、SEMI 2024 年半导体设备市场报告、IC Insights 2024 年 Fabless 厂商排名、Gartner 2024 年全球半导体市场报告
- 130.中国晶圆代工行业现状深度研究与投资前景分析报告（2024-2031 年）.<https://m.chinabaogao.com/baogao/202406/712340.html>
- 131.半导体行业协会(SIA)2025 年市场报告、Gartner 半导体市场分析、IDC 芯片市场追踪数据
- 132.集邦咨询-半导体、LED、显示面板、新能源等国际高科技产业研究机构.<https://www.trendforce.cn/>
- 133.IC Insights、Strategy Analytics 2024 年半导体行业分析报告
- 134.中国半导体白皮书.<https://www.bain.cn/pdfs/202208220536478028.pdf>
-

- 
135. SEMI 报告：2023 年全球半导体材料市场销售额从 2022 年的历史高点 ....<https://www.semi.org.cn/site/semi/article/3a3b6aef3037478dbe1184a88f8b7345.htm>  
|
136. SEMI：2023 年全球半导体材料市场下滑 7%-国际电子商情.<https://www.esmchina.com/news/11767.html>
137. SEMI：2024 年全球半导体材料市场规模达 675 亿美元，同比增长 3.8%.<https://finance.sina.com.cn/tech/digi/2025-04-29/doc-ineuvakc5261601.shtml>
138. 半导体材料：国产化迫不及  
待.<https://picture.iczhiku.com/weixin/message1580696054299.html>
139. 彤程新材料集团股份有限公司 2024 年年度报告摘要.<https://qxb-pdf-oss-cache.qixin.com/AnBaseinfo/5f76892d41ae70bed045471f9566391d.pdf>
140. 明年硅片出货量，或将强劲反弹 10%-腾讯新闻.<https://news.qq.com/rain/a/20241101A07JXV00>
141. 第一季度全球硅片出货量同比增长 10%—华通数据中心财经资讯.<http://data.acmr.com.cn/freesource/zixunshow.asp?id=41545>
142. 半导体硅片深度：全球硅片景气上行，国产厂商加速破局-电子工程专辑.<https://www.eet-china.com/mp/a80916.html>
143. SEMI：2024 年全球硅晶圆出货量同比下降 2.7%.<https://wap.eastmoney.com/a/202502113315893575.html>
144. TrendForce 集邦咨询：AI 与通用型服务器驱动需求，2Q25 前五大企业 ....<https://www.trendforce.cn/presscenter>
145. 1Q25 淡季效应减轻，晶圆代工营收季减至 5.4 ... - TrendForce 集邦咨询.<https://www.trendforce.cn/presscenter/news/20250609-12611.html>
146. 高科技产业研讨会-集邦咨询.<https://www.trendforce.cn/seminar.html>
147. TrendForce 集邦咨询：受 AI 强劲需求驱动，2025 年第一季全球前十大 IC ....<https://www.trendforce.cn/presscenter/news/20250612-12617.html>
-

- 
148. 光伏周价格| 硅料硅片成交价格上调, 组件端成交博弈激烈-国际电子商情.<https://www.esmchina.com/marketnews/54458.html>
149. 矽电股份: 2025 年首家半导体企业今日上市, 开盘涨超 240%! .<https://stcn.com/article/detail/1603805.html>
150. 区域市场研究报告和行业分析, 2024 年区域渠道数据
151. 德勤公司发布《2025 年全球半导体产业分析报告》.<https://www.las.ac.cn/front/product/detail?id=50b7ebccea855dbffe734aa3e542bcbf>
152. 多源权威机构综合报告 2025: SEMI(<https://www.semi.org>), Gartner(<https://www.gartner.com>), IDC(<https://www.idc.com>), 麦肯锡(<https://www.mckinsey.com>), 波士顿咨询(<https://www.bcg.com>), 德勤(<https://www2.deloitte.com>)
153. 波士顿咨询半导体行业分析 2025, 德勤半导体市场研究报告 2025. <https://www.bcg.com>, <https://www2.deloitte.com>
154. SEMI 半导体行业客户分析报告 2025, 麦肯锡半导体供应链研究 2025. <https://www.semi.org>, <https://www.mckinsey.com>
155. BCG 咨询半导体行业分析报告 2024, McKinsey 行业竞争分析
156. 产业研究\_行业分析报告—产业在线•全产业链研究专家.<http://www.chinaiol.com/>
157. 霍尼韦尔国际公司 216.40(-0.17%)\_美股\_新浪财经\_新浪网.<https://stock.finance.sina.com.cn/usstock/quotes/hon.html>
158. 美光科技公司 124.20(4.62%)\_美股\_新浪财经\_新浪网.<http://stock.finance.sina.com.cn/usstock/quotes/MU.html?wm=>
159. WSTS 世界半导体贸易统计组织 2025 年全球半导体市场报告
160. SIA 发布《2024 年美国半导体产业现状报告》.<https://www.istis.sh.cn/cms/news/article/43/27051>
161. SIA: 半导体谷底已过 2024 年全球销售增至 6000 亿美元- C114 通信网.<https://m.c114.com.cn/w51-1273307.html>
-

- 
162. 1925 亿美元，中国仍是世界最大芯片市场！2022 全球半导体行业报告 ....<https://finance.sina.com.cn/tech/cs/2022-02-16/doc-ikyamrna1058695.shtml>
163. 美国半导体行业协会：取代台湾产能“至少要花 3 年”-电子工程世界.<https://news.eeworld.com.cn/manufacture/ic534391.html>
164. 中国人工智能专利发展专题报告.<https://www.foridom.com/Uploads/File/2019-04-22/%E4%B8%AD%E5%9B%BD%E4%BA%BA%E5%B7%A5%E6%99%BA%E8%83%BD%E4%B8%93%E5%88%A9%E5%8F%91%E5%B1%95%E4%B8%93%E9%A2%98%E6%8A%A5%E5%91%8A.pdf>
165. AIRS 主导发布 IEEE 国际设备与系统路线图（IRDS）机器人计算 ....<http://airs.cuhk.edu.cn/article/1269>
166. 贸易相关措施与法律服务简讯.<https://commerce.sz.gov.cn/attachment/1/1383/1383199/11004810.pdf>
167. 简报：拜登-哈里斯政府阐明协调性方针以利用人工智能之力促进美国 ....<https://china.usembassy-china.org.cn/zh/fact-sheet-biden-harris-administration-outlines-coordinated-approach-to-harness-power-of-ai-for-u-s-national-security/>
168. Amkor 推动亚利桑那州的半导体未来发展.<https://amkor.com/cn/amkor-technology-arizona/>
169. 美国产业政策复兴：目标、特征与启示-中国社会科学院工业经济研究所.[http://gjs.cssn.cn/kydt/kydt\\_kycg/202404/t20240424\\_5747763.shtml](http://gjs.cssn.cn/kydt/kydt_kycg/202404/t20240424_5747763.shtml)
170. 美国半导体产业协会：《半导体供应链的新兴弹性》.<https://www.cmes.org/library/recom/44797c7245cc43a1aef37fd8bd97a568.html>
171. 麦肯锡- 电子工程专辑.<https://www.eet-china.com/mp/tags/85138>
172. 麦肯锡全球研究院发布《2025 年技术趋势展望》：到 2030 年 ....<https://juejin.cn/post/7532167067891449906>
173. 麦肯锡预测到 2030 年，半导体市场规模将达万亿美元-电子工程专辑.<https://www.eet-china.com/mp/a122141.html>
174. 麦肯锡 2025 年技术展望：应用专用半导体成为全球科技必争之地 ....<https://ee.ofweek.com/2025-08/ART-8140-2818-30668186.html>
-



- 
175. 美国半导体-OFweek 电子工程网.<https://ee.m.ofweek.com/tag-%E7%BE%8E%E5%9B%BD%E5%8D%8A%E5%AF%BC%E4%BD%93.HTM>
176. 恩智浦(NXPI)股票最新价格行情,实时走势图,股价分析预测\_英为财经 ....<https://cn.investing.com/equities/nxp-semiconductors>
177. 英伟达(NVDA)股票收益\_英为财经 Investing.com.<https://cn.investing.com/equities/nvidia-corp-earnings>
178. 英特尔公司(INTC)股票收益\_英为财经 Investing.com.<https://cn.investing.com/equities/intel-corp-earnings>
179. 高通 2025 财年第三季度财报电话会议摘要.<https://finance.sina.com.cn/roll/2025-07-31/doc-infikrfm2603739.shtml?from=ggmp>
180. 高通 2025 财年第三季度财报电话会议摘要.<https://finance.sina.com.cn/roll/2025-07-31/doc-infikrfm2603739.shtml>
181. 中国奢侈品市场延续强势增长, Z 世代将成为未来消费主力军- 贝恩公司.[https://www.bain.com.cn/news\\_info.php?id=1013](https://www.bain.com.cn/news_info.php?id=1013)
182. [尼尔森]: 通往 2025: 中国消费者展望- 发现报告.<https://www.fxbaogao.com/detail/4622698>
183. 英飞凌(IFXGn)财报\_财务概况\_股票财务指标分析\_英为财经 Investing ....<https://cn.investing.com/equities/infineon-tech-financial-summary>
184. 麦肯锡半导体行业定价策略报告、贝恩公司半导体业务分析、各企业财报电话会议记录
185. 综合多个行业报告和财务数据源: 台积电 2025 年财报、三星电子半导体业务报告、英特尔 2025 年 Q2 财报、英伟达财务报告、博通半导体业务数据、高通移动芯片业务、阿斯麦光刻设备报告、应用材料设备数据、德州仪器模拟芯片业务、美光科技存储芯片业务
186. 麦肯锡: 到 2030 年, 半导体市场可望达到万亿美元规模-国际电子商情.<https://www.esmchina.com/news/8850.html>
187. 麦肯锡预测到 2030 年, 半导体市场规模将达万亿美元|-厦门诺博视科技 ....<http://robo-sight.com/industrytrends/361.html>
-

- 
188. 天音控股(000829)\_公司公告\_天音控股：关于天音通信控股股份有限 ...[https://vip.stock.finance.sina.com.cn/corp/view/vCB\\_AllBulletinDetail.php?stockid=000829&id=10562701](https://vip.stock.finance.sina.com.cn/corp/view/vCB_AllBulletinDetail.php?stockid=000829&id=10562701)
189. Untitled.[https://seugs.seu.edu.cn/\\_upload/article/files/31/59/7aa7c57842e19bf01c6e1c2da8cc/7c078f8a-39c0-4aa3-9cf2-17b8b2029899.xls](https://seugs.seu.edu.cn/_upload/article/files/31/59/7aa7c57842e19bf01c6e1c2da8cc/7c078f8a-39c0-4aa3-9cf2-17b8b2029899.xls)
190. 英伟达：人工智能计算加速进行时| 互联网数据资讯网-199IT | 中文 ...<https://www.199it.com/archives/705673.html>
191. 波士顿-www.51paper.net.<http://www.51paper.net/s/bcg/>
192. 中美芯片战，2032 年打成什么样了\_手机新浪网.<https://finance.sina.cn/2024-05-13/detail-inauzwwi5396980.d.html>
193. 研报：2032 年中国高端芯片产量仅占全球 2%-电子工程专辑.<https://www.eet-china.com/mp/a312823.html>
194. 2024 年芯片行业预测：强势复苏，将实现两位数增长？-电子工程专辑.<https://www.eet-china.com/mp/a272252.html>
195. 芯片研报：2024 年全球半导体收入 6260 亿美元，同比增长 18.1% - 知乎.<https://zhuanlan.zhihu.com/p/22762605112>
196. 行业新闻 | Industry News-富鸿创芯电子（深圳）有限公司.<https://fordevices.com/m/list.asp?id=120>
197. Gartner：2024 年全球半导体营收 6559 亿美元，AI 助力英伟达首登榜首.<https://www.semiunion.com/market/17445388253669.html>
198. 机构：2024 年半导体材料市场营收 675 亿美元.<https://www.cepem.com.cn/news/detail/4967>
199. SEMI：2025 年全球晶圆厂设备投资预计将达到 1100 亿美元- 知乎.<https://zhuanlan.zhihu.com/p/1888303508291297721>
200. SEMI 预测：2030 年半导体行业将面临 100 万人才缺口-电子工程专辑.<https://www.eet-china.com/news/202507017765.html>
-

- 
201. SEMI: 2025 年全球晶圆厂设备投资预计将达到 1100 亿美元| 信息  
化 ....<https://www.infoobs.com/article/20250327/68811.html>
202. SEMI 预计 2030 年全球半导体产业面临百万人才缺口\_亿欧快  
讯.<https://www.iyiou.com/briefing/202506301793706>
203. 立讯精密工业股份有限公司投资者关系活动记录  
表.<http://news.10jqka.com.cn/field/sn/20250428/52014647.shtml?ts=3&q=3>
204. 芯联集成电路制造股份有限公司投资者关系活动记录表.<https://cn.unt-c.com/download/%E6%8A%95%E8%B5%84%E8%80%85%E5%85%B3%E7%B3%BB/%E8%8A%AF%E8%81%94%E9%9B%86%E6%88%90%E7%94%B5%E8%B7%AF%E5%88%B6%E9%80%A0%E8%82%A1%E4%BB%BD%E6%9C%89%E9%99%90%E5%85%AC%E5%8F%B82025%E5%B9%B404%E6%9C%8829%E6%97%A5%E6%8A%95%E8%B5%84%E8%80%85%E5%85%B3%E7%B3%BB%E6%B4%BB%E5%8A%A8%E8%AEB0%E5%BD%95%E8%A1%A8.pdf>
205. 上海新阳半导体材料股份有限公司投资者关系活动记录  
表.<http://static.cninfo.com.cn/finalpage/2025-05-09/1223513560.PDF>
206. 中兴通讯股份有限公司投资者关系活动记录表.<http://static.cninfo.com.cn/finalpage/2025-03-31/1222963233.PDF>
207. 南京商络电子股份有限公司投资者关系活动记录  
表.<http://static.cninfo.com.cn/finalpage/2024-04-16/1219633502.PDF>
208. 彭博社:2023 年全球电动汽车销量将创新高-CarMeta.<https://www.car-metaverse.com/202301/132237745.html>
209. 中证指数官网.<https://www.csindex.com.cn/>
210. 欧盟半导体战略的驱动因素、实施路径及前景展望.[https://german-studies-online.tongji.edu.cn/\\_upload/article/files/2a/2f/88ad25e44f4abe52907f9fd90740/af1b2584-376f-4f13-a60f-3f6b600d1c94.pdf](https://german-studies-online.tongji.edu.cn/_upload/article/files/2a/2f/88ad25e44f4abe52907f9fd90740/af1b2584-376f-4f13-a60f-3f6b600d1c94.pdf)
211. 欧盟《芯片法案 2.0》战略升级! -国际电子商  
情.<https://www.esmchina.com/marketnews/53646.html>
212. 总理事会会议强调需进一步深化对 WTO 改革的讨论 2 月 18 日至 19  
日 ....<https://ciwto.uibe.edu.cn/docs/2025-03/baf074a354ba494b8b6236db094f70f3.pdf>
-

- 
213. 欧盟公布《芯片法案》 实现战略雄心前景存疑-新华网.[http://www.news.cn/world/2022-02/10/c\\_1128353658.htm](http://www.news.cn/world/2022-02/10/c_1128353658.htm)
214. 重要国际会议目录.<https://www.sist.tsinghua.edu.cn/4-2023.pdf>
215. 半导体封测会议\_集成电路制造会议\_微电子制造产业交流平台.<https://www.cepem.com.cn/>
216. 2025 年全球半导体市场八大趋势预测-腾讯新闻.<https://news.qq.com/rain/a/20241213A07I2A00>
217. 金蝶国际公布 2025 年中期业绩云订阅收入增长 22.1% AI 应用商业化加速.<http://www.news.cn/finance/20250813/9a63cb6b23434c838c444c598ef31581/c.html>
218. 2 万字详解：2025 年 ICT 行业 CRM 应用与数字化转型实践-知乎.<https://zhuanlan.zhihu.com/p/1928824931468161604>
219. 国产算力飞跃启新，AI 引领产业链发展变革.<http://cgws.com/cczq/ggdt/ccyj/202406/P020240617315123369639.pdf>
220. WiFi 芯片战火重燃，预计 2022 年全球 Wi-Fi 芯片市场规模达 197.2 亿美元.<https://finance.sina.cn/hkstock/ggyw/2020-01-31/detail-iimxxste7816001.d.html>
221. 摩根日本精选股票型证券投资基金(QDII) 2025 年中期报告.<https://www.cifm.com/fund/007280/announce/202508/W020250829368399799649.pdf>
222. 半导体封装\_最新动态\_半导体封装介绍\_亿欧网.<https://www.iyiou.com/t/bandaotifengzhuang>
223. Untitled.<https://www.sss.tsinghua.edu.cn/jichuruanjianshengtaifazhandeyichujiazhiyanjiubaogao.pdf>
224. 拨开迷雾，回归价值，锻造资本市场管理能力，麦肯锡全周期市值 ....<https://www.smartcity.team/reports/%E9%BA%A6%E8%82%AF%E9%94%A1%E5%85%A8%E5%91%A8%E6%9C%9F%E5%B8%82%E5%80%BC%E7%AE%A1%E7%90%86/>
225. 中华人民共和国国家标准国民经济行业分类.<https://www.stats.gov.cn/xxgk/tjbz/gjtjbz/202008/P020200811606493723477.pdf>
-

- 
226. Untitled. <https://www.cnis.ac.cn/bydt/zhxw/202409/P020240927394375229944.pdf>
227. 聚焦|“湘聚智算绿动未来”2025 中国产业转移发展对接活动（湖南 ... [https://www.cics-cert.org.cn/web\\_root/webpage/articlecontent\\_101001\\_1906948076459790338.html](https://www.cics-cert.org.cn/web_root/webpage/articlecontent_101001_1906948076459790338.html)
228. 山东省商务厅预警信息 2024 年度印度国际标准化合作情况与特点趋势 .... [http://commerce.shandong.gov.cn/art/2025/1/17/art\\_250176\\_10348819.html](http://commerce.shandong.gov.cn/art/2025/1/17/art_250176_10348819.html)
229. Micro-LED 白皮书发布，这 2 家中国企业跻身全球 TOP5. <https://www.zhihuiya.com/observer/detail/24.html>
230. 半导体技术的世代交替，谁将会主宰后摩尔时代的技术走向？-电子 .... <https://www.eet-china.com/mp/a202853.html>
231. 先进封装：2025 国内市场超 1100 亿后摩尔时代半导体技术提升主流 .... <http://stcn.com/article/detail/971356.html>
232. 创新：不灭的火炬——科技与产业链发展研究报告. <https://www.cicc.com/upload/repository/file/7edb04a8-8b5f-40f5-b24d-2281b5a6257e.pdf>
233. BCG：中国医疗器械行业转型的关键——提升营销效率. <https://www.iyiou.com/news/2018070876348>
234. 台积电硅光，取得重要进展| 信息化观察网- 引领行业变革. <https://www.infoobs.com/article/20250102/68124.html>
235. 芯和半导体创始人/总裁代文亮博士：集成系统 EDA 加速 Chiplet 先进 .... <https://www.eet-china.com/mp/a428788.html>
236. 三代半导体材料助功率半导体突破，氮化镓创新获奖. [https://m.thepaper.cn/baijiahao\\_7728354](https://m.thepaper.cn/baijiahao_7728354)
237. 2025 年，半导体行业三大技术热点| 界面·财经号. <https://www.jiemian.com/article/12150090.html>
238. 先进封装，再度升温- OFweek 电子工程网. <https://ee.ofweek.com/2025-02/ART-8440-2815-30656408.html>
-

- 
- 239.TSMC2025 北美技术研讨会亮点-电子工程专辑.<https://www.eet-china.com/mp/a403302.html>
- 240.突破 CMOS 工艺极限半导体技术下一步往哪走? -电子工程专辑.<https://www.eet-china.com/news/210301.html>
- 241.2025 尖端半导体技术现状汇总: 2nm,CFET,2D 材料.....-电子工程专辑.<https://www.eet-china.com/news/202502138426.html>
- 242.中国先进封装厂商, 业绩飙升- OFweek 电子工程网.<https://ee.ofweek.com/2025-04/ART-8470-2800-30661132.html>
- 243.全新 GAA 技术是否能成为突破 5nm 的利器? -电子工程世界.<https://news.eeworld.com.cn/manufacture/ic466227.html>
- 244.2025 中国生命科学与医疗行业调研报告 160+份汇总解读|附 PDF 下载原创.[https://blog.csdn.net/qq\\_19600291/article/details/146256147](https://blog.csdn.net/qq_19600291/article/details/146256147)
- 245.职业发展| 2024-2025 学年秋季学期第 15-16 周实习就业信息汇总-通知 ....<https://itf.sjtu.edu.cn/show-391-483.html>
- 246.为什么月度数据“工业主要产品产量” 缺失每年的 1、2 月数据? -广西 ....<http://tjj.gxzf.gov.cn/zt/ywzt/ywztjzs/tjswzs/t19661673.html>
- 247.2025 年度消费新潜力白皮书 470+份汇总解读|附 PDF 下载\_AI 技术在 ....[https://blog.csdn.net/qq\\_19600291/article/details/148110427](https://blog.csdn.net/qq_19600291/article/details/148110427)
- 248.年报网-宣小二-全媒体发布平台.<https://m.xuanxiaoer.com/media/detail/48941>
- 249.我国企业研发投入跻身世界前列, 上市公司“群星闪耀时”.<https://finance.sina.com.cn/stock/relnews/cn/2025-07-10/doc-infeytkq0236323.shtml>
- 250.WIPO 发布《世界知识产权指标报告》, 2023 年全球专利申请量创历史 ....<https://way-insight.cn/?company/1653.html>
- 251.Untitled.<https://www.zwbdata.com/upfiles/attachment/2025/0701/a87bb8f3-f014-a2f0-f0d9-ebc46b9df831.pdf>
- 252.价值与理念-京东方官网.<https://www.boe.com/about/index>
-

- 
- 253.2025 年全球 5G 标准必要专利百强权利人：华为第一，中兴第二 ....<https://www.icsmart.cn/87581/>
- 254.智慧芽专利数据库.<https://www.zhihuiya.com/products/analytics>
- 255.智慧芽重磅公布 2024 年度全球与中国科创领袖 TOP100 双榜单.<https://www.zhihuiya.com/observer/detail/81023>
- 256.对战略性新兴产业开展专利分析及预警研究——绘制路线图导航新发展.[https://www.cnipa-gd.com/service\\_detail/30.html](https://www.cnipa-gd.com/service_detail/30.html)
- 257.专利-商标-智慧芽.<https://www.zhihuiya.com/jh>
- 258.东方证券：维持华虹半导体买入评级目标价 79.63 港元.<https://www.cls.cn/detail/2124624>
- 259.《中国光伏产业发展路线图（2024-2025 年）》开放下载.[https://www.chinapv.org.cn/Industry/resource\\_1405.html](https://www.chinapv.org.cn/Industry/resource_1405.html)
- 260.台积电先进制程技术路线图揭示人工智能带动半导体产业迈向万亿 ....<https://zhuanlan.zhihu.com/p/1908843244126729184>
- 261.《中国制造 2025》重点领域技术路线图\_百度百科.<https://baike.baidu.com/item/%E3%80%8A%E4%B8%AD%E5%9B%BD%E5%88%B6%E9%80%A02025%E3%80%8B%E9%87%8D%E7%82%B9%E9%A2%86%E5%9F%9F%E6%8A%80%E6%9C%AF%E8%B7%AF%E7%BA%BF%E5%9B%BE/18707668>
- 262.2023-2024 年全球应用程序安全测试市场研究报告.<http://www.owasp.org.cn/OWASP-CHINA/owasp-project/2023-2024-5e74516874035e9475287a0b5e8f5b8951686d4b8bd55e02573a78147a7662a5544a/2023-2024%E5%B9%B4%E5%85%A8%E7%90%83%E5%BA%94%E7%94%A8%E7%A8%8B%E5%BA%8F%E5%AE%89%E5%85%A8%E6%B5%8B%E8%AF%95%E5%B8%82%E5%9C%BA%E7%A0%94%E7%A9%B6%E6%8A%A5%E5%91%8A.pdf>
- 263.2025 就业增长点在哪里？专家解读\_中国访谈\_中国网.[http://fangtan.china.com.cn/2025-06/26/content\\_117949405.htm](http://fangtan.china.com.cn/2025-06/26/content_117949405.htm)
- 264.摩根核心精选股票型证券投资基金 2025 年中期报告.<https://www.cifm.com/fund/005983/announce/202508/W020250829365812772137.pdf>
-



- 
- 265.《深圳市时尚产业发展规划（2021-2025 年）》在线访谈-访谈回顾 ....[https://fgw.sz.gov.cn/hdjl/zxft/fthg/content/post\\_8810810.html](https://fgw.sz.gov.cn/hdjl/zxft/fthg/content/post_8810810.html)
- 266.拍脑袋预测宁德时代 40 年后业绩的三个国信证券分析师被警示- 21 经济网.<http://www.21jingji.com/article/20211023/herald/fcef2c8c5810e0fdccfa79bf9a079f1f.html>
- 267.国务院 9 月重要政策\_\_中国政府网.[https://www.gov.cn/yaowen/liebiao/202409/content\\_6977882.htm](https://www.gov.cn/yaowen/liebiao/202409/content_6977882.htm)
- 268.国务院政策例行吹风会（2024 年 6 月 26 日）\_中国政府网.<https://www.gov.cn/xinwen/2024zccfh/21/index.htm>
- 269.加力稳外贸稳外资高水平开放更进一步\_政策解读\_中国政府网.[https://www.gov.cn/zhengce/202503/content\\_7012602.htm](https://www.gov.cn/zhengce/202503/content_7012602.htm)
- 270.政策持续完善银发经济再拓空间\_政策解读\_中国政府网.[https://www.gov.cn/zhengce/202401/content\\_6925082.htm](https://www.gov.cn/zhengce/202401/content_6925082.htm)
- 271.政府工作报告\_\_中国政府网.[https://www.gov.cn/yaowen/liebiao/202503/content\\_7013163.htm](https://www.gov.cn/yaowen/liebiao/202503/content_7013163.htm)
- 272.赢得芯片竞赛——美国半导体行业协会报告- OFweek 电子工程网.<https://ee.ofweek.com/2025-01/ART-8470-2800-30655842.html>
- 273.美国重塑半导体产业链的逻辑  
[1].[https://iir.sass.org.cn/\\_upload/article/files/cb/4a/7d487623480a953c001c2a11261d/d191e50e-b50e-4064-9515-8629ee13a0c2.pdf](https://iir.sass.org.cn/_upload/article/files/cb/4a/7d487623480a953c001c2a11261d/d191e50e-b50e-4064-9515-8629ee13a0c2.pdf)
- 274.SIA: 美国半导体实力，官方数据来了- OFweek 电子工程网.<https://ee.ofweek.com/2025-06/ART-8500-2816-30664543.html>
- 275.东方财富网: 官方制造业 PMI.  
[https://datacenter.jin10.com/reportType/dc\\_chinese\\_manufacturing\\_pmi](https://datacenter.jin10.com/reportType/dc_chinese_manufacturing_pmi)
- 276.日本政府支持人工智能发展的财税政策分析.[http://www.iwep.org.cn/xscg/xscg\\_lwybg/202404/W020240416606779731697.pdf](http://www.iwep.org.cn/xscg/xscg_lwybg/202404/W020240416606779731697.pdf)
-

- 
277. 日本 Rapidus 启动 2nm GAA 晶体管试制, 2027 年量产计划不变-电子 ....<https://www.eet-china.com/news/202507183869.html>
278. 南华早报| 王辉耀: 在一个破碎的世界中, 中日韩合作是亚洲的支柱.<http://wanghuiyao.com/archives/2683>
279. 中国的半导体材料产业市场趋势.<https://www.nepconchina.com/zh-cn/mtzx/hyxw/bandaoticailliaohangyeshichang.html>
280. 日本产业升级与人口结构变化对我国之启示\_恒旭分享\_公司新闻\_恒旭 ....<https://www.hengxucapital.com/index.php?c=show&id=283>
281. 上海国际经贸合规法律服务平台.<https://www.tclegal.cn/border-enforcement>
282. CSIS 地缘政治报告 2024, 欧盟委员会文件, 中国工信部政策文件
283. 全球经济未来的变数与期待.[http://sww.hangzhou.gov.cn/art/2025/3/3/art\\_1229451273\\_58903582.html](http://sww.hangzhou.gov.cn/art/2025/3/3/art_1229451273_58903582.html)
284. 上新| 全球商业航天卫星通信季度简报.<https://www.chinaerospace.com/article/show/52c9145fc7da74a2cf43c6449335eb3b>
285. 气候与地缘政治变化背景下中欧战略性矿产资源政策演变研究.<http://www.chinaminingmagazine.com/cn/article/pdf/preview/10.12075/j.issn.1004-4051.20242339.pdf>
286. Articles Archives | Guidepoint.<https://www.guidepoint.net/category/articles-zh-cn/>
287. 日本消费升级对中国的启示  
\*.<https://pic.bankofchina.com/bocappd/rareport/202012/P020201218602982088427.pdf>
288. 江苏省国际商会信息服务欧盟经济面临复杂挑战.[https://www.coicjs.org/art/2025/6/6/art\\_2387\\_138087.html](https://www.coicjs.org/art/2025/6/6/art_2387_138087.html)
289. 欧盟经济面临复杂挑战.[http://paper.ce.cn/pad/content/202506/06/content\\_314874.html](http://paper.ce.cn/pad/content/202506/06/content_314874.html)
290. 数字中国发展报告 (2024 年) .<https://www.nda.gov.cn/sjj/ywpd/sjzg/0530/ff808081-96b465bf-0197-200a135e-0536.pdf>
-

- 
- 291.重磅！2025 年中国及 31 省市功率半导体行业政策汇总及解读  
(全 ....<https://www.qianzhan.com/analyst/detail/220/250814-59140758.html>
- 292.AI 驱动半导体产业革新，台积电 A14 制程引领技术突破- 电子方案资讯  
\_ ....<https://www.52solution.com/news/80059531/>
- 293.台积电中国技术论坛：先进制程/封装需求旺盛，扩张背后成本承压 ....<https://www.eet-china.com/news/202405292826.html>
- 294.台积电公布 2nm 制程，预计 2025 年量产\_AI&大模型\_凌敏\_InfoQ 精  
选 ....<https://www.infoq.cn/article/yxignf9bgvltocr4qlqv>
- 295.2024 年台积电美国厂再亏损南京厂盈利表现佳.<https://finance.sina.com.cn/jjxw/2025-04-22/doc-inetyyey7909974.shtml>
- 296.AI 芯天下 | 热点 | GaN 市场洗牌：台积电抽身，力积电接棒-  
OFweek ....<https://ee.ofweek.com/2025-07/ART-8460-2816-30667091.html>
- 297.离谱！某头部半导体公司人员已集体转行了....-电子工程专辑.<https://www.eet-china.com/mp/a393673.html>
- 298.IIGF 年报| 2024 年上市公司 ESG 信息披露进展报告（下篇）-中央财  
经 ....<https://iigf.cufe.edu.cn/info/1012/10309.htm>
- 299.美国工厂持续巨亏 台积电却追加千亿美元投资美国-中国经营  
网.<http://www.cb.com.cn/index/show/zj/cv/cv135303941264>
- 300.增强供应链韧性：日本政策的出台与走向-中国社会科学院工业经  
济 ....[http://gjs.cass.cn/kydt/kydt\\_kycg/202111/t20211108\\_5372961.shtml](http://gjs.cass.cn/kydt/kydt_kycg/202111/t20211108_5372961.shtml)
- 301.美国商务部对中华人民共和国实施先进计算和半导体制造的出口管  
制 ....<https://china.usembassy-china.org.cn/zh/commerce-implements-new-export-controls-on-advanced-computing-and-semiconductor-manufacturing-items-to-the-peoples-republic-of-china-prc/>
- 302.简述美国商务部工业与安全局出台针对中国管制的先进计算芯片  
及 ....[https://shangwuju.tj.gov.cn/tjsswjzz/ztzl/ztzl/swfzjsgz1/gpmy/hyzc/202311/t20231113\\_6454610.html](https://shangwuju.tj.gov.cn/tjsswjzz/ztzl/ztzl/swfzjsgz1/gpmy/hyzc/202311/t20231113_6454610.html)
-

- 
- 303.上海国际经贸合规法律服务平台.<https://www.tclegal.cn/content-detail/?id=1902336271414464513&type=0>
- 304.上海国际经贸合规法律服务平台.<https://www.tclegal.cn/content-detail/?id=1863931933784891393&type=0>
- 305.AI 赋能集成电路教育数字化发展白皮书.[https://ic.bupt.edu.cn/\\_\\_local/3/46/7D/F72B109D401998033FC21339FBA\\_9AB8D3B8\\_17E738.pdf](https://ic.bupt.edu.cn/__local/3/46/7D/F72B109D401998033FC21339FBA_9AB8D3B8_17E738.pdf)
- 306.行业资讯- 深圳市半导体行业协会- 官网.<https://www.szsia.com/?cat=22>
- 307.市场报告- 市场- C114 通信网.<https://www.c114.com.cn/market/39.html?page=2>
- 308.2025 年晶圆代工行业预计年增长率达 20%! .[https://www.ichub.com/srvContent/view?columnType=4&id=1005978480802299905&column\\_id=895237290801561601](https://www.ichub.com/srvContent/view?columnType=4&id=1005978480802299905&column_id=895237290801561601)
- 309.市场数据| SEMI.<https://china.semi.org.cn/article/77>
- 310.SEMI 报告：2024 年全球半导体设备总销售额预计将达到创纪录的 ....<https://www.semi.org.cn/site/semi/article/16cb7540523f47488868ecc76800df15.html>
- 311.1640 亿！国家大基金三期首次出手-观察者网.[https://www.guancha.cn/economy/2025\\_01\\_03\\_760981.shtml](https://www.guancha.cn/economy/2025_01_03_760981.shtml)
- 312.国家大基金三期来了，投资风向吹向哪？.<https://www.stcn.com/article/detail/1216058.html>
- 313.豪掷超 55 亿！国家大基金 2024 年布局 14 家半导体企业-国际电子商情.<https://www.esmchina.com/marketnews/52394.html>
- 314.大基金三期出手不凡 1600 亿元投资两只基金.<https://www.stcn.com/article/detail/1477857.html>
- 315.大基金三期出手不凡 1600 亿元投资两只基金.<https://finance.sina.com.cn/roll/2025-01-03/doc-inecrpz9279764.shtml>
- 316.台积电的“美国梦”，特朗普可能不想让它做了-36 氪.<https://m.36kr.com/p/3111030065172233>
-

- 
317. 英特尔“千亿美元”投资计划再次延期，解释称：需与市场需求保持一致 ....<https://www.eet-china.com/news/202503039812.html>
318. 德国科技创新简报总第 86 期.[http://de.china-embassy.gov.cn/chn/kjcx/dgkjcxjb/202503/t20250311\\_11573001.htm](http://de.china-embassy.gov.cn/chn/kjcx/dgkjcxjb/202503/t20250311_11573001.htm)
319. 《2021 年美国创新与竞争法案》瞄准对华科技竞争.[http://www.casisd.cn/zkcg/ydkb/kjzcyzxkb/2021/zczxkb\\_202108/202110/P020211009319571471401.pdf](http://www.casisd.cn/zkcg/ydkb/kjzcyzxkb/2021/zczxkb_202108/202110/P020211009319571471401.pdf)
320. IDC 预估 2025 全球半导体市场稳步增长：AI 需求成关键驱动力 ....<https://www.c114.com.cn/market/39/a1285775.html>
321. IDC 发布 2024 年全球半导体市场八大预测.<http://www.seccw.com/document/detail/id/26804.html>
322. IDC 预计：2025 年全球半导体市场规模将同比增长 15%.<https://finance.sina.com.cn/tech/roll/2024-12-16/doc-inczrenz2868673.shtml>
323. 全球板级封装部署加速，TGV 技术值得关注- 与非网.<https://www.eefocus.com/article/1680261.html>
324. 2024 年，半导体行业的机会在哪里？ - 广东省半导体行业协会.<http://www.gdsia.net/index.php/2024/03/13/elementor-3643/>
325. 工业和信息化部发展改革委财政部税务总局关于印发《集成电路设计》 ....[https://www.gov.cn/gongbao/content/2014/content\\_2640864.htm](https://www.gov.cn/gongbao/content/2014/content_2640864.htm)
326. 深圳市罗湖区人民政府关于印发深圳市罗湖区产业转型升级专项资金 ....[https://sf.sz.gov.cn/gfxwjcx/qjgfxwj/lhq/qzfgfxwj/qzf/content/post\\_8588251.html](https://sf.sz.gov.cn/gfxwjcx/qjgfxwj/lhq/qzfgfxwj/qzf/content/post_8588251.html)
327. 韩国营商环境报告 2023.<https://www.ccpit.org/image/1273893138053726209/4b509071f5c4455ba7f50681133ba755.pdf>
328. 美国半导体管制的新拉拢对象——韩国.[https://shangwuju.tj.gov.cn/tjsswjzz/ztzl/ztzl/swfzjsgz1/gpmy/hyzc/202410/t20241022\\_6758285.html](https://shangwuju.tj.gov.cn/tjsswjzz/ztzl/ztzl/swfzjsgz1/gpmy/hyzc/202410/t20241022_6758285.html)
-

---

329.1640 亿！国家大基金三期首次出手.<https://finance.sina.com.cn/roll/2025-01-03/doc-inecsrnu8828838.shtml>

330.深圳证券交易所-定期报告.<http://www.szse.cn/www/disclosure/listed/fixed/>

331.半导体人才荒，何解？\_手机新浪网.<https://finance.sina.cn/2024-06-04/detail-inaxpvrh6994745.d.html?from=wap>

332.【会展】全球规模最大半导体专业展即将举行！浦东多措并举支持 ....<https://www.pudong.gov.cn/019011001/20250310/802775.html>

333.WSTS：2025 全球半导体市场规模将达 7008.74 亿美元- 行业动态 ....<https://www.ygst.com/newsshow-100-377-1.html>

334.IPO 研究| 2026 年全球半导体市场规模将增至 7607 亿美元，同比增幅 ....<https://m.rccaijing.com/news-7346116716114147308.html>

335.杜邦分析网站有哪些推荐？高效获取最新财务数据- FineReport 报表 ....<https://www.finereport.com/blog/article/68b979c7d2527e0eb763c7a1>

336.SEMI：2024 年全球硅晶圆出货量为 12266 百万平方英寸同比下降 2.7 ....<https://www.199it.com/archives/1741578.html>

337.2025 年全球半导体市场预计保持 10%以上的年增长率——蓄势待发 ....<https://www.xhby.net/content/s66f9debbe4b0ac1d26c25198.html>

338.“大摩”持续加仓！这些年报预增股正在被机构抢筹！-周刊原创-证券 ....<https://static.weeklyonstock.com/24/1224/zbf202323.html>

339.亚化咨询推出《中国半导体大硅片年度报告 2024》，欢迎索取目录！ .<https://finance.sina.com.cn/roll/2025-07-17/doc-inffttzy2182380.shtml?from=ggmp>

340.陕西投资新兴产业发展有限公司.[https://sxiei.com/index/article/detail.html?id=22&article\\_id=933](https://sxiei.com/index/article/detail.html?id=22&article_id=933)

341.深圳市惠企政策汇编| 中国投资事务网.<https://ecnia.com.cn/%E6%B7%B1%E5%9C%B3%E5%B8%82%E6%83%A0%E4%BC%81%E6%94%BF%E7%AD%96%E6%B1%87%E7%BC%96>

- 
- 342.政策法规| 中国投资事务网.<https://ecnia.com.cn/%E6%94%BF%E7%AD%96%E6%B3%95%E8%A7%84>
- 343.深圳市财政专项资金统一管理平台.<https://cqt.szfb.sz.gov.cn/?themePage=4&noticePage=19&policyPage=9&publicityPage=4>
- 344.中关村科学城集成电路流片补贴申报指南（征求意见稿）\_集成电路 ...<https://www.icdata.com.cn/platform/electronics/newsCollection/detail.do?guid=71cb07a3ed404fd0b39ff4a1c7de54c5>
- 345.化合物半导体行业：前所未有的前景- 埃特曼半导体技术有限公司.<https://www.atoman.com/189.html>
- 346.普华永道：2025 年上半年中国并购市场交易额同比增长 45% | 每日 ...<https://www.nbd.com.cn/articles/2025-08-25/4026882.html>
- 347.普华永道：2025 年上半年中国并购市场交易额同比增长 45%.<https://www.stcn.com/article/detail/3258027.html>
- 348.报告显示上半年中国并购市场交易额同比增长 45%\_中国经济网 ...[http://www.ce.cn/xwzx/gnsz/gdxw/202508/t20250825\\_2453182.shtml](http://www.ce.cn/xwzx/gnsz/gdxw/202508/t20250825_2453182.shtml)
- 349.普华永道报告：上半年中国并购交易额同比提升 45%，全年有望实现 ...<https://www.stcn.com/article/detail/3258177.html>
- 350.南方财经全媒体集团 - 南方财经网.<https://www.sfccn.com/2025/8-25/0MMDE0MDZfMjA1ODM0MA.html>
- 351.产品市场分析和渠道调研数据，2024 年渠道偏好分析
- 352.大联大登顶，Q1 头部元器件分销商业绩及趋势观察.[https://www.ichub.com/srvContent/view?columnType=4&id=1070028926739775489&column\\_id=762208315435614209](https://www.ichub.com/srvContent/view?columnType=4&id=1070028926739775489&column_id=762208315435614209)
- 353.有芯电子荣获“2023 杰出本土 TOP 级国际分销商”.[https://www.ichub.com/srvContent/view?columnType=4&id=953684766665441281&column\\_id=762208315435614209](https://www.ichub.com/srvContent/view?columnType=4&id=953684766665441281&column_id=762208315435614209)
-



- 
- 354.2024 年度中国本土电子元器件分销商营收排名 TOP25\_杭州芯霖微 ....<https://www.hzxldz.com/index.php?m=home&c=View&a=index&aid=143>
- 355.最新全球 TOP10 元器件分销商 Q1 业绩大 PK-电子工程专辑.<https://www.eet-china.com/mp/a314449.html>
- 356.2024 年第一季度，全球 TOP4 电子元器件分销商业绩大 PK-电子工程专辑.<https://www.eet-china.com/mp/a312399.html>
- 357.渠道分销场景数字化采购解决方案-渠道分销商城系统-渠道订货系统 ....<https://51qqt.com/solutions/supply-chain-distribution.html>
- 358.要么数字化，要么被淘汰！供应链转型是大势所趋-EDN 电子技术设计.<https://www.ednchina.com/news/5938.html>
- 359.今年，杀出 325 家大胆投资机构：全国最佳，名单如下| 万字报告- 维科号.<https://mp.ofweek.com/Internet/a056714066537>
- 360.1985-2025：中国电子元器件分销的黄金 40 年-国际电子商情.<https://www.esmchina.com/news/12765.html>
- 361.数字化转型砸百万美元，赚了还是亏了？-国际电子商情.<https://www.esmchina.com/news/10921.html>
- 362.2022 - 年年度報告.<https://pic.bankofchina.com/bocappd/report/202304/P020230428605861679020.pdf>
- 363.深圳创华芯电子官方网站.<https://www.chchip.com/news/index/2.html>
- 364.募投项目缩减纳百川 IPO 迎考\_手机新浪网.<https://finance.sina.cn/2025-08-28/detail-infnmzsy7457446.d.html?oid=%E7%9A%87%E5%86%A0%E8%B6%B3%E7%90%83%E7%BD%91%E7%99%BB2%E5%87%BA%E7%A7%9F%E2%96%B2Telegram:hga158%E2%96%BCWrcU&vt=4>
- 365.中信建投：华为汽车产业链 2025 年投资展望.<https://finance.sina.com.cn/stock/hyyj/2024-12-21/doc-ineafezm5294128.shtml>
- 366.上证搜索| 上海证券交易所.<https://www.sse.com.cn/home/search/index.shtml?webswd=688484>
-

- 
- 367.公司公告| 上海证券交易所  
所.<http://www.sse.com.cn/assortment/stock/list/info/announcement/index.shtml?productId=688484>
- 368.公告大全.<https://data.eastmoney.com/notice/688484.html>
- 369.Untitled.<http://gdstc.gd.gov.cn/attachment/0/506/506056/4040765.pdf>
- 370.中共中央国务院印发《长江三角洲区域一体化发展规划纲要》  
\_\_2019 ....[https://www.gov.cn/gongbao/content/2019/content\\_5462503.htm](https://www.gov.cn/gongbao/content/2019/content_5462503.htm)
- 371.安徽省新能源和节能环保产业发展规划（2022-  
2025）.<http://www.frphs.cn/uploads/allimg/20240617/1-24061G54111N0.pdf>
- 372.“AI+敏捷”如何驱动研发变革？BCG 发布《AI 赋能研发》报告，揭  
示 ....<https://www.ctocio.com/reports/41101.html>
- 373.半导体设备最新报告！四大核心设备三种已突破光刻机仍是痛-  
C114 ....<https://m.c114.com.cn/w51-1185072.html>
- 374.中国半导体行业协会 2024 年度报告、各公司年报数据整理
- 375.Gartner 半导体市场报告 2024, IC Insights 行业分析 2025, 半导体行业协会统计数据
- 376.智能体赛道杀出一批未来独角兽：3 大方向正突破| 万字报告-  
OFweek ....<https://m.ofweek.com/ai/2025-06/ART-201700-8500-30665052.html>
- 377.2025 年中国汽车芯片供应链（IP、IC 设计、晶圆代工、封测、认  
证 ....<http://www.pday.com.cn/Htmls/Report/202503/24551695.html>
- 378.掌握半导体行业发展脉搏| 专家网络| 岂珀  
(Guidepoint).<https://www.guidepoint.net/%E6%8E%8C%E6%8F%A1%E5%8D%8A%E5%AF%BC%E4%BD%93%E8%A1%8C%E4%B8%9A%E5%8F%91%E5%B1%95%E8%84%89%E6%90%8F/>
- 379.企业数字化转型对供应链韧性的影响研究：文献综述 1. 数字化转型  
的 ....<https://jie.uibe.edu.cn/docs/2025-05/3118ad1b339f43809e62dd53e4740879.pdf>
-

- 
- 380.德勤深度：140 亿元大蛋糕！制造业中的 AI 机会，中国制造强国的秘密 ....<https://m.zhidx.com/p/300780.html>
- 381.国际设备和系统路线图- 维基百科，自由的百科全书.<https://zh.wikipedia.org/zh-hans/%E5%9B%BD%E9%99%85%E8%AE%BE%E5%A4%87%E5%92%8C%E7%B3%B%E7%BB%9F%E8%B7%AF%E7%BA%BF%E5%9B%BE>
- 382.国际半导体技术路线图- 维基百科，自由的百科全书.<https://zh.wikipedia.org/zh-hans/%E5%9B%BD%E9%99%85%E5%8D%8A%E5%AF%BC%E4%BD%93%E6%8A%80%E6%9C%AF%E8%B7%AF%E7%BA%BF%E5%9B%BE>
- 383.后摩尔时代的碳基电子技术: 进展、应用与挑战.<https://wulixb.iphy.ac.cn/cn/article/doi/10.7498/aps.71.20212076>
- 384.2017 石墨烯技术专利分析报告.<http://www.cnitech.ac.cn/news/news/201705/W020170524487158507286.pdf>
- 385.Untitled.<http://academics.casad.cas.cn/xshd/kxyjsqylt/2020/d114c/202101/P020240605640201174135.pdf>
- 386.先进 EDA 技术与产业创新| 第十六届电子年会专题论坛日程抢先看-中国 ....[https://www.cie.org.cn/list\\_42/4897.html](https://www.cie.org.cn/list_42/4897.html)
- 387.硅微电子技术物理极限对策探讨——中国科学院.[https://www.cas.cn/zt/jzt/wxcbzt/zgkxyyk2007ndlq/xkfz/200712/t20071203\\_2668318.shtml](https://www.cas.cn/zt/jzt/wxcbzt/zgkxyyk2007ndlq/xkfz/200712/t20071203_2668318.shtml)
- 388.首届“南湖之光”高端论坛.[https://www.opticsjournal.net/Post/files/2025/7/img\\_133959008646313869.pdf](https://www.opticsjournal.net/Post/files/2025/7/img_133959008646313869.pdf)
- 389.从资本市场蜕变看“重估中国牛”.[https://finance.sina.com.cn/roll/2025-09-06/doc-infnpnwit0230055.shtml?cre=tianyi&mod=pchp&loc=13&r=0&rfunc=14&tj=cxvertical\\_pc\\_hp&tr=12](https://finance.sina.com.cn/roll/2025-09-06/doc-infnpnwit0230055.shtml?cre=tianyi&mod=pchp&loc=13&r=0&rfunc=14&tj=cxvertical_pc_hp&tr=12)
- 390.半导体巨头韦尔股份为何突然更名? .<https://wap.eastmoney.com/a/202505203409785121.html>
- 391.前 11 个月我国货物贸易进出口增长 4.9%\_部门动态\_中国政府网.[https://www.gov.cn/lianbo/bumen/202412/content\\_6991832.htm](https://www.gov.cn/lianbo/bumen/202412/content_6991832.htm)
-

- 
392. 中美地缘技术竞争视角下的中美智库观点及对我国的启示.[http://www.bulletin.cas.cn/BCAS\\_CH/doi/10.16418/j.issn.1000-3045.20250107004](http://www.bulletin.cas.cn/BCAS_CH/doi/10.16418/j.issn.1000-3045.20250107004)
393. 国家知识产权局年度报告.<https://www.cnipa.gov.cn/col/col94/index.html>
394. 研制龙芯 CPU 的策略考虑-中国科学院计算技术研究所.[https://www.ict.ac.cn/liguojiewenxuan\\_162523/wzlj/lgjgjscy/201912/t20191227\\_5476545.html](https://www.ict.ac.cn/liguojiewenxuan_162523/wzlj/lgjgjscy/201912/t20191227_5476545.html)
395. 普惠性税收优惠政策\_重庆市人民政府网.<https://www.cq.gov.cn/zt/ssyhzc2025/phxss/>
