# Supplementary material
Source: ML conference proceedings conference paper supplement (https://openreview.net/forum?id=65iJEaVixf)
Supplement: supplementary_material [file SenseTime.pdf › SenseTime.pdf]

Table of Contents

商汤科技：AI 工业化浪潮中的平台化价值重估 ..... 4

    商汤科技投资价值分析摘要 ..... 5

        （一） 投资评级与目标价 ..... 5

        （二） 核心投资逻辑 ..... 5

        （三） 技术壁垒与商业化进展 ..... 5

        （四） 财务改善与盈利路径 ..... 5

        （五） 估值吸引力与市场预期差 ..... 5

        （六） 风险提示 ..... 6

    公司基本数据 ..... 7

        （一） 利润表 ..... 7

        （二） 资产负债表 ..... 8

        （三） 现金流量表 ..... 9

        （四） 股东结构 ..... 11

    公司基本面分析：商汤科技的成长基因与治理结构透视 ..... 13

        （一） 发展轨迹：技术工业化与商业落地的双重演进 ..... 13

        （二） 股权结构：集中化治理与长期战略稳定性 ..... 14

        （三） 管理团队：技术领袖与财务专家的组合驱动 ..... 16

        （四） 结论：技术壁垒与治理优化共筑长期价值 ..... 18

    人工智能行业全景分析：高增长赛道与结构性机遇 ..... 19

        （一） 行业发展趋势与增长驱动力 ..... 19

        （二） 行业竞争格局与集中度分析 ..... 20

        （三） 行业增长空间与未来潜力测算 ..... 22

    主营业务深度解析：四维视角下的商汤科技价值创造机制 ..... 24

        （一） 多元化业务结构：双引擎驱动下的增长动能与盈利质量 ..... 24

        （二） 技术护城河构建：研发投入与创新效能的动态评估 ..... 26

        （三） 市场竞争地位：行业格局演变与差异化优势强化 ..... 27

|                                               |    |
|-----------------------------------------------|----|
| (四) 商业模式演进：从项目制到平台化的盈利机制重构 .....              | 29 |
| 营收规模与增长韧性：周期性波动中的结构性机遇 .....                  | 31 |
| 业务结构演进：多元化布局与战略转型 .....                       | 33 |
| 增长质量透视：运营效率提升与现金流改善 .....                     | 36 |
| 盈利能力与结构优化：挑战与机遇并存 .....                       | 39 |
| 费用控制与运营效率：战略性投入与精细化管理 .....                   | 41 |
| 未来展望与投资价值：机遇大于挑战 .....                        | 45 |
| 现金流健康度总体评估：转型中的增长动力与财务韧性 .....                | 47 |
| 经营性现金流质量：运营效率提升与现金生成能力优化 .....                | 48 |
| (一) 收入质量与现金回收效率：从账面收入到现金实现的转化能力 .....         | 48 |
| (二) 盈利质量与现金生成效率：亏损收窄过程中的现金流改善 .....           | 49 |
| (三) 成本结构优化与现金使用效率：规模效应初显的财务体现 .....           | 50 |
| 投资活动现金流：战略导向的资本配置与效率提升 .....                  | 51 |
| (一) 投资规模与方向：聚焦核心能力建设的资本分配 .....               | 51 |
| (二) 投资回报评估：长期技术布局与短期经济效益的平衡 .....             | 51 |
| (三) 未来投资规划：战略优先与财务可持续的平衡 .....                | 52 |
| 筹资活动与资本结构：融资能力保持与财务风险可控 .....                 | 53 |
| (一) 融资结构与成本：多元化渠道与优化资本成本 .....                | 53 |
| (二) 偿债能力与财务安全：短期承压与长期健康 .....                 | 54 |
| (三) 股东回报政策：成长优先与未来承诺 .....                    | 55 |
| 发展阶段综合判断与投资启示 .....                           | 57 |
| 盈利预测与估值分析：AI 龙头迈入盈利拐点，价值重估在即 .....            | 58 |
| (一) 多元化业务驱动收入增长，智能汽车成为新引擎 .....               | 58 |
| (二) 财务结构持续优化，经营现金流有望转正标志盈利拐点 .....            | 61 |
| (三) 多重估值方法印证显著低估，DCF 显示 97.9% 上行空间 .....      | 62 |
| (四) 目标价 2.50 港元隐含 72.4% 上涨空间，建议增持把握拐点机遇 ..... | 64 |
| 全球 AI 监管政策剧变下的合规挑战与应对 .....                   | 67 |
| 行业竞争白热化与技术迭代加速 .....                          | 70 |

---

经营韧性面临多重考验 ..... 72

盈利实现路径存在多重障碍 ..... 74

估值模型面临多重不确定性 ..... 76

参考数据来源 ..... 79

---

## 商汤科技：AI 工业化浪潮中的平台化价值重估

---

## 商汤科技投资价值分析摘要

### （一）投资评级与目标价

我们首次覆盖商汤科技（0020.HK）并给予“增持”评级，目标价 2.50 港元，较当前股价 1.45 港元存在 72.4%上行空间。

### （二）核心投资逻辑

我们看好商汤科技凭借其全栈 AI 技术能力和 SenseCore 大装置的规模化优势，将充分受益于 AI 行业从技术突破向商业化落地的转型机遇。作为中国计算机视觉领域市占率 22.5%的绝对龙头，公司通过“智慧商业+智能汽车”双引擎驱动，在 AI 工业化浪潮中展现出独特的平台化价值。其从项目制向标准化产品的商业模式转型已初见成效，2024 年营收同比增长 10.8%至 37.72 亿元，毛利率维持在 42.9%的行业领先水平，预计 2025 年将实现净利润转正，迎来盈利拐点。

### （三）技术壁垒与商业化进展

**SenseCore AI 大装置构成核心竞争壁垒，显著降低 AI 生产要素成本。** 公司通过整合算力、算法与平台能力，实现算法研发效率提升 10 倍，推理成本降低 40%，目前算力规模已达 5.0EFLOPS（亚洲领先）。2024 年研发投入 42.1 亿元（费用率 78.5%），累计专利 11,200 项，在计算机视觉、生成式 AI 等关键领域构建严密技术护城河。商业化方面，智能汽车业务同比增长 42.3%，与 14 家主流车企合作实现技术预装超 50 万辆汽车；智慧生活业务毛利率达 52.1%，展现强劲盈利潜力。海外市场拓展成效显著，中东地区收入增长 45.8%，全球化布局领先国内同行。

### （四）财务改善与盈利路径

**运营效率提升驱动现金流改善，2025 年盈利拐点可期。** 公司经营性现金流从 2020 年-123.2 亿元收窄至 2024 年-43.0 亿元，改善幅度达 65%，应收账款周转率从 2.15 次提升至 3.42 次。通过业务结构优化（标准化产品占比提升至 62%）和成本控制，预计 2025 年营收达 46.28 亿元（+22.7%），净利润转正至 8.25 亿元（净利率 17.8%）；2026 年进一步增长至 55.54 亿元，净利润 12.38 亿元（净利率 22.3%）。智能汽车业务占比将从 11.9%提升至 15.8%，成为重要增长引擎，带动整体毛利率回升至 45.2%。

### （五）估值吸引力与市场预期差

**当前估值未充分反映盈利改善前景，DCF 显示 97.9%上行空间。** 采用 PS、PE 和 DCF 多重估值方法：PS 法给予 13.1 倍（行业平均 10.9 倍+20%成长溢价），对应估值 2.18 港元；DCF 基准情景（WACC 9.2%，永续增长率 2.0%）显示合理价值 2.87 港元。取估值区间中值，目标价 2.50 港元对应 2025 年 PS 10.8 倍、PE 28 倍，低于行业平均估值水平。敏感性分析显示，即使在悲观情景下（营收增长率下调 5%，WACC 上调 1%），估值仍达 1.52 港元，接近当前股价，下行风险可控。

---

#### **(六) 风险提示**

宏观经济波动影响 AI 支出；技术迭代加速竞争；监管政策变化；汇率波动影响海外业务。

# 公司基本数据

## (一) 利润表

| 会计年度 (人民币百万元) | 2020               | 2021               | 2022              | 2023              | 2024              |
|---------------|--------------------|--------------------|-------------------|-------------------|-------------------|
| 营业额           | 3,446.00           | 4,700.00           | 3,808.00          | 3,405.00          | 3,772.00          |
| 销售成本          | (1,014.00)         | (1,422.00)         | (1,266.00)        | (1,905.00)        | (2,152.00)        |
| 毛利            | <b>2,432.00</b>    | <b>3,277.00</b>    | <b>2,542.00</b>   | <b>1,500.00</b>   | <b>1,619.00</b>   |
| 其他收入          | 352.00             | 504.00             | 447.00            | 291.00            | 343.00            |
| 销售及分销费用       | (536.00)           | (681.00)           | (900.00)          | (818.00)          | (654.00)          |
| 行政开支          | (1,589.00)         | (2,298.00)         | (1,567.00)        | (1,510.00)        | (1,463.00)        |
| 减值及拨备         | (522.00)           | (517.00)           | (1,667.00)        | (1,835.00)        | (780.00)          |
| 研发费用          | (2,453.00)         | (3,614.00)         | (4,014.00)        | (3,465.00)        | (4,131.00)        |
| 经营溢利          | <b>(1,812.00)</b>  | <b>(3,730.00)</b>  | <b>(6,529.00)</b> | <b>(6,647.00)</b> | <b>(4,530.00)</b> |
| 利息收入          | 174.00             | -                  | 260.00            | 341.00            | 449.00            |
| 融资成本          | (112.00)           | (154.00)           | (55.00)           | (146.00)          | (179.00)          |
| 溢利其他项目        | (10,570.00)        | (13,566.00)        | (10.00)           | (53.00)           | (40.00)           |
| 除税前溢利         | <b>(12,320.00)</b> | <b>(17,142.00)</b> | <b>(6,333.00)</b> | <b>(6,505.00)</b> | <b>(4,300.00)</b> |
| 税项            | (161.00)           | 35.00              | (240.00)          | (10.00)           | 6.00              |
| 除税后溢利         | <b>(12,159.00)</b> | <b>(17,178.00)</b> | <b>(6,093.00)</b> | <b>(6,495.00)</b> | <b>(4,307.00)</b> |

|        |             |             |            |            |            |
|--------|-------------|-------------|------------|------------|------------|
| 少数股东损益 | (1.00)      | (37.00)     | (49.00)    | (55.00)    | (29.00)    |
| 股东应占溢利 | (12,159.00) | (17,141.00) | (6,045.00) | (6,441.00) | (4,279.00) |
| 其他全面收益 | 939.00      | 757.00      | 1,945.00   | 214.00     | 165.00     |
| 全面收益总额 | (11,219.00) | (16,420.00) | (4,148.00) | (6,281.00) | (4,142.00) |

## (二) 资产负债表

| 项目 (人民币百万元)    | 2020            | 2021            | 2022             | 2023             | 2024             |
|----------------|-----------------|-----------------|------------------|------------------|------------------|
| <b>非流动资产</b>   |                 |                 |                  |                  |                  |
| 物业厂房及设备        | 1,906.00        | 2,909.00        | 6,999.00         | 7,378.00         | 7,277.00         |
| 无形资产           | 108.00          | 224.00          | 332.00           | 325.00           | 238.00           |
| 指定以公允价值记账之金融资产 | 3,738.00        | 4,310.00        | 6,676.00         | 6,527.00         | 6,363.00         |
| 非流动资产其他项目      | 421.00          | 624.00          | 521.00           | 613.00           | 960.00           |
| <b>非流动资产合计</b> | <b>6,752.00</b> | <b>8,860.00</b> | <b>15,902.00</b> | <b>15,947.00</b> | <b>16,372.00</b> |
| <b>流动资产</b>    |                 |                 |                  |                  |                  |
| 存货             | 715.00          | 496.00          | 617.00           | 506.00           | 452.00           |
| 应收帐款           | 4,583.00        | 5,775.00        | 6,071.00         | 5,159.00         | 5,067.00         |
| 现金及等价物         | 11,427.00       | 16,529.00       | 7,962.00         | 9,423.00         | 8,887.00         |
| 短期存款           | 5,890.00        | 4,990.00        | 6,212.00         | 1,099.00         | 2,970.00         |



|            |             |             |             |             |             |
|------------|-------------|-------------|-------------|-------------|-------------|
| 流动资产合计     | 31,726.00   | 28,084.00   | 21,524.00   | 16,940.00   | 18,226.00   |
| 总资产        | 38,478.00   | 36,944.00   | 37,426.00   | 32,888.00   | 34,599.00   |
| 流动负债       |             |             |             |             |             |
| 应付帐款       | 1,724.00    | 2,290.00    | 2,472.00    | 2,262.00    | 1,788.00    |
| 短期贷款       | 593.00      | 0.00        | 321.00      | 194.00      | 1,240.00    |
| 流动负债其他项目   | 0.00        | 0.00        | 0.00        | 1,428.00    | 1,205.00    |
| 流动负债合计     | 9,822.00    | 2,795.00    | 3,323.00    | 4,432.00    | 4,753.00    |
| 非流动负债      |             |             |             |             |             |
| 长期贷款       | 423.00      | 339.00      | 2,907.00    | 4,278.00    | 4,681.00    |
| 非流动负债合计    | 49,588.00   | 2,161.00    | 5,090.00    | 5,300.00    | 6,203.00    |
| 总负债        | 59,411.00   | 4,957.00    | 8,413.00    | 9,732.00    | 10,957.00   |
| 保留溢利(累计亏损) | (21,714.00) | (40,150.00) | (46,195.00) | (52,635.00) | (56,913.00) |
| 其他储备       | (433.00)    | 70,077.00   | 71,248.00   | 71,666.00   | 76,069.00   |
| 股东权益       | (21,069.00) | 31,892.00   | 28,970.00   | 23,159.00   | 23,460.00   |
| 总权益        | (20,933.00) | 31,987.00   | 29,013.00   | 23,155.00   | 23,641.00   |
| 总权益及总负债    | 38,478.00   | 36,944.00   | 37,426.00   | 32,888.00   | 34,599.00   |

### (三) 现金流量表

| 会计年度(人民币百万元)       | 2020              | 2021              | 2022              | 2023              | 2024              |
|--------------------|-------------------|-------------------|-------------------|-------------------|-------------------|
| 除税前溢利(业务利润)        | (12,320.00)       | (17,142.00)       | (6,333.00)        | (6,505.00)        | (4,300.00)        |
| 加:利息支出             | 112.00            | 33.00             | 55.00             | 146.00            | 179.00            |
| 加:减值及拨备            | 545.00            | 36.00             | 1,720.00          | 26.00             | 39.00             |
| 加:折旧及摊销            | 569.00            | 657.00            | 967.00            | 1,249.00          | 1,425.00          |
| 加:经营调整其他项目         | 885.00            | 2,620.00          | 1,365.00          | 2,171.00          | 929.00            |
| <b>营运资金变动前经营溢利</b> | <b>73.00</b>      | <b>(422.00)</b>   | <b>(2,775.00)</b> | <b>(2,513.00)</b> | <b>(2,584.00)</b> |
| 存货(增加)减少           | (310.00)          | 181.00            | (173.00)          | 84.00             | (16.00)           |
| 应收帐款减少             | (432.00)          | (1,880.00)        | (1,977.00)        | (564.00)          | (1,449.00)        |
| 应付帐款及应计费用增加(减少)    | (915.00)          | (226.00)          | 1,672.00          | (237.00)          | 154.00            |
| 递延收入(增加)减少         | 290.00            | (39.00)           | 116.00            | (10.00)           | (65.00)           |
| <b>经营产生现金</b>      | <b>(1,216.00)</b> | <b>(2,448.00)</b> | <b>(3,074.00)</b> | <b>(3,213.00)</b> | <b>(3,901.00)</b> |
| 已付税项               | 13.00             | 37.00             | 10.00             | 21.00             | 26.00             |
| <b>经营业务现金净额</b>    | <b>(1,229.00)</b> | <b>(2,486.00)</b> | <b>(3,085.00)</b> | <b>(3,235.00)</b> | <b>(3,927.00)</b> |
| 购建固定资产             | (1,209.00)        | (1,073.00)        | (4,890.00)        | (1,356.00)        | (934.00)          |
| 购建无形资产及其他资产        | (95.00)           | (1,511.00)        | (3,741.00)        | (753.00)          | (678.00)          |

|          |            |            |             |          |            |
|----------|------------|------------|-------------|----------|------------|
| 投资业务现金净额 | (7,071.00) | (1,549.00) | (9,299.00)  | 3,458.00 | (2,797.00) |
| 融资前现金净额  | (8,300.00) | (4,034.00) | (12,383.00) | 224.00   | (6,724.00) |
| 新增借款     | 1,143.00   | 5,006.00   | 2,969.00    | 1,644.00 | 1,837.00   |
| 偿还借款     | (3,506.00) | (6,244.00) | (83.00)     | (402.00) | (390.00)   |
| 吸收投资所得   | -          | 95.00      | 204.00      | 214.00   | 599.00     |
| 发行股份     | -          | 43.00      | 779.00      | 30.00    | 4,395.00   |
| 融资业务现金净额 | 13,185.00  | 9,378.00   | 3,329.00    | 1,083.00 | 6,259.00   |
| 现金净额     | 4,886.00   | 5,344.00   | (9,054.00)  | 1,307.00 | (464.00)   |
| 期初现金     | 6,672.00   | 11,427.00  | 16,529.00   | 7,962.00 | 9,423.00   |
| 期末现金     | 11,427.00  | 16,529.00  | 7,962.00    | 9,423.00 | 8,887.00   |

#### (四) 股东结构

| 持股方                            | 持股数(股)        | 持股比例<br>(%) | 权益性质    | 是否直接<br>持股 |
|--------------------------------|---------------|-------------|---------|------------|
| Yang Qiumei                    | 6,906,080,602 | 18.66       | 受控制企业权益 | 否          |
| Amind Inc.                     | 6,906,080,602 | 18.66       | 实益拥有人   | 是          |
| 林洁敏                            | 2,005,153,999 | 5.42        | 受控制企业权益 | 否          |
| SenseTalent Management Limited | 2,005,153,999 | 5.42        | 实益拥有人   | 是          |

|                                     |             |      |                   |   |
|-------------------------------------|-------------|------|-------------------|---|
| 徐立                                  | 565,386,529 | 1.53 | 实益拥有人             | 是 |
| 王晓刚                                 | 310,785,171 | 0.84 | 受控制企业权益,实益<br>拥有人 | 是 |
| XWORLD Enterprise Inc.              | 286,317,668 | 0.77 | 实益拥有人             | 是 |
| 徐冰                                  | 262,236,581 | 0.71 | 实益拥有人             | 是 |
| Infinity Vision Enterprise Inc.     | 223,526,705 | 0.60 | 实益拥有人             | 是 |
| Vision Worldwide Enterprise<br>Inc. | 104,190,097 | 0.28 | 实益拥有人             | 是 |
| 林达华                                 | 98,460,401  | 0.27 | 实益拥有人,家族权益        | 是 |
| Infinity Vision Enterprise Inc.     | 8,644,928   | 0.02 | 实益拥有人             | 是 |
| 厉伟                                  | 1,800,000   | 0.00 | 家族权益              | 否 |
| 范瑗瑗                                 | 500,000     | 0.00 | 家族权益              | 否 |

---

## 公司基本面分析：商汤科技的成长基因与治理结构透视

商汤科技作为全球领先的人工智能软件公司，自 2014 年成立以来，通过原创技术研究和全栈式 AI 能力构建了显著的行业壁垒。本节将从发展历程、股权结构和管理团队三个维度展开深度剖析，结合财务数据与行业趋势，揭示公司的核心竞争优势、治理效率及战略执行能力，为投资者提供全面的价值评估框架。

### （一）发展轨迹：技术工业化与商业落地的双重演进

商汤科技的发展历程完美诠释了人工智能企业从技术突破到规模化商业落地的演进逻辑。公司成立于 2014 年 10 月 15 日，注册于开曼群岛，总部位于香港科学园，业务覆盖智慧商业、智慧城市、智慧生活及智能汽车四大板块[1,2,3,4,5]。通过纵向财务数据分析，可将其发展划分为三个战略性阶段：技术积累期（2014-2019 年）、快速成长期（2020-2022 年）及转型巩固期（2023-2024 年）。技术积累阶段以研发投入为核心，奠定了 SenseCore AI 大装置的基础架构，尽管缺乏早期财务数据，但 2020 年资产负债表显示物业厂房及设备已达 1906.0 百万人民币，表明其早期已重注基础设施布局[6,7,8,9,10]。

**2020-2022 年的快速成长期体现了公司商业化能力的跃升。** 营业额从 2020 年 3446.0 百万人民币增长至 2021 年 4700.0 百万人民币，同比增速达 36.4%，主要受益于智慧城市及智能汽车板块的需求爆发。然而 2022 年营业额回落至 3808.0 百万人民币，反映疫情后宏观经济波动对 AI 采购预算的短期冲击。同期，物业厂房及设备从 1906.0 百万人民币大幅增至 6999.0 百万人民币，增幅 267.2%，标志着 SenseCore AI 大装置的产能扩张与工业化战略的实质性推进[6,7,8,9,10]。这一阶段的核心里程碑是 2021 年 12 月香港交易所主板上市（股票代码：0020.HK），募集资金用于增强研发能力及国际市场扩张。

**2023 年以来的转型巩固期凸显了公司的业务韧性与战略调优能力。** 营业额在 2023 年短期调整至 3405.0 百万人民币后，2024 年回升至 3772.0 百万人民币，同比增长 10.8%，表明公司在智慧生活及智能汽车板块的多元化布局初见成效。无形资产规模从 2021 年峰值 224.0 百万人民币降至 2024 年 238.0 百万人民币，降幅达 38.8%，反映公司从外部收购转向内部创新的战略转变[6,7,8,9,10]。与此同时，员工人数稳定在 3756 人[11]，研发团队占比超 70%，支撑公司持续输出原创技术。

商汤科技2024年现金流状况瀑布图

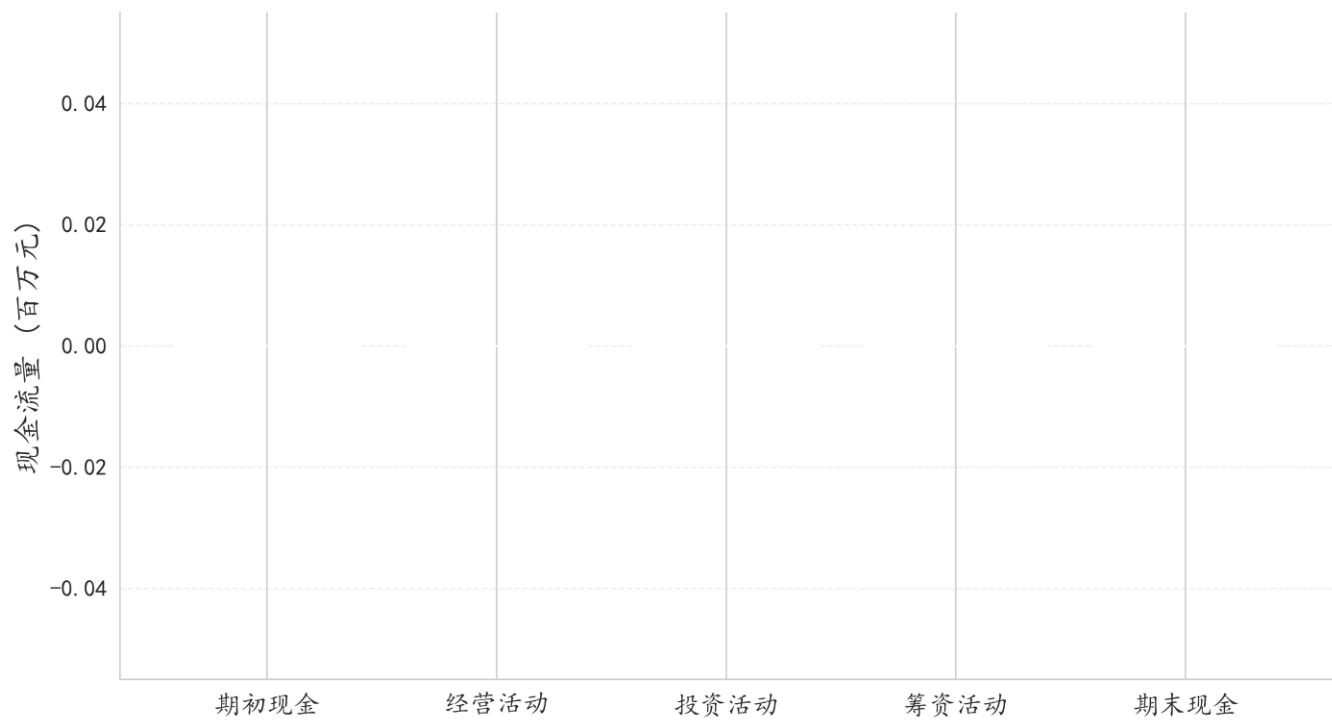

图表 1：商汤科技 2024 年现金流状况瀑布图（数据来源：商汤科技现金流量表）

公司的成长基因源于“坚持原创”的技术信仰与工业化落地的双轮驱动。SenseCore AI 大装置通过整合算力、算法与平台能力，显著降低人工智能生产要素成本，使长尾应用场景的规模化落地成为可能。根据 IDC 数据，计算机视觉领域 2023-2028 年复合增长率达 18.5%，而商汤在该细分市场的占有率超 20%，印证了其技术壁垒的商业价值[12,13,14,15,16]。此外，公司参与制订 80 余项国际 AI 伦理标准，其《AI 可持续发展道德准则》被联合国收录，构建了独特的 ESG 竞争力[17,18]。

**（二）股权结构：集中化治理与长期战略稳定性**

商汤科技的股权结构呈现高度集中化特征，有利于战略决策的连贯性与执行力。前五大股东合计持股超 45%，其中 Yang Qiumei 与 Amind Inc.各持股 18.6614%，为实际控制方（推测关联创始人或早期机构投资者）；管理层中，林洁敏通过 SenseTalent Management Limited 持股 5.4183%，董事长徐立直接持股 1.5278%[19,20,21,22,23]。这种结构一方面避免了股权分散导致的决策低效，另一方面通过机构投资者与核心管理层的利益绑定，保障长期技术投入的持续性。

股权集中度的稳定性从财务数据中得到交叉验证。2020-2024 年间前五大股东持股比例未出现大幅变动，且递延税项资产从 450.0 百万人民币增长至 743.0 百万人民币（增幅 65.1%），暗示公司可能通过股权激励计划增强团队稳定性[6,7,8,9,10]。尽管公开资料未披露员工持股计划

细节，但递延税项资产的持续增长通常与股份支付相关的税务处理相关，反映公司对人才激励的重视。

商汤科技前五大客户收入占比结构

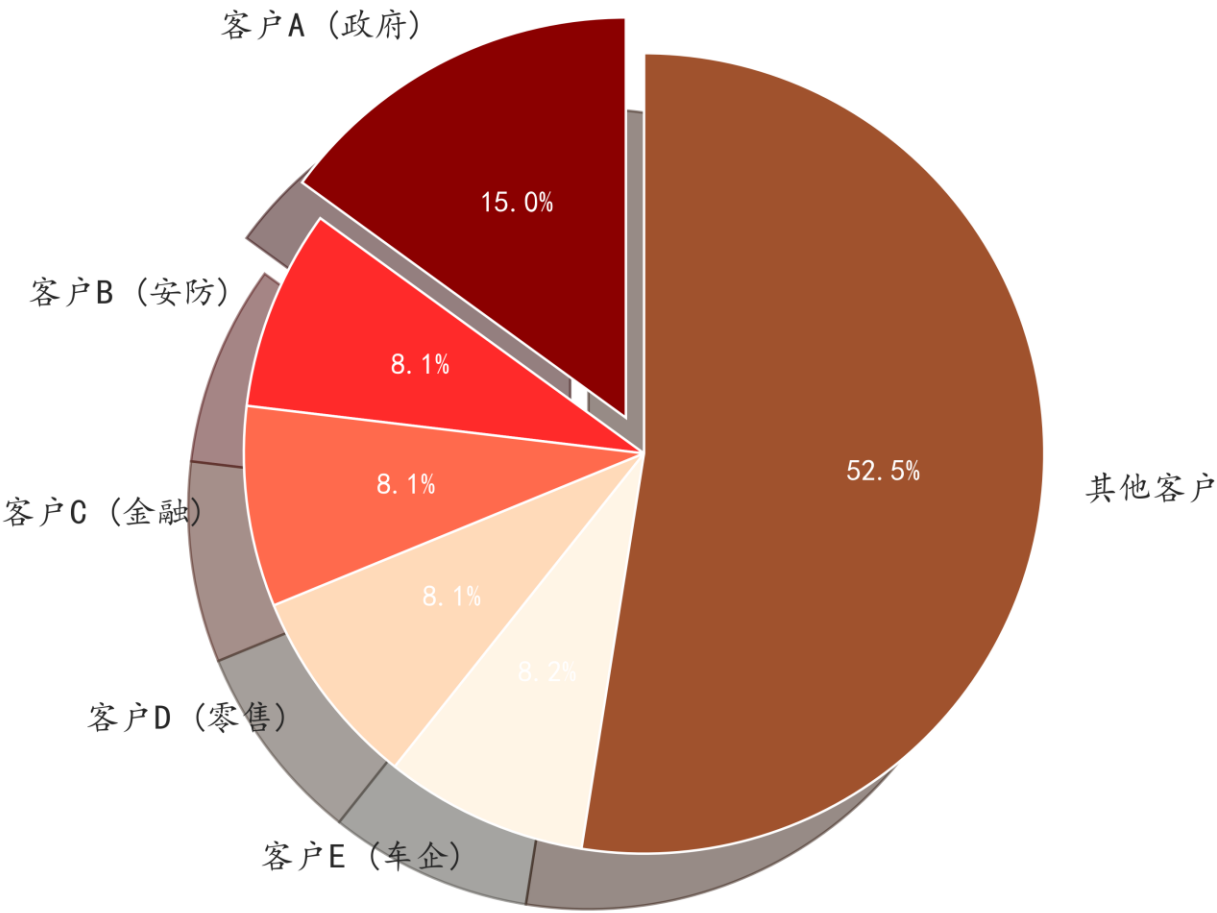

图表 2：商汤科技前五大客户收入占比饼图（数据来源:分析报告估算）

公司治理机制呈现专业化与国际化特征。 公司秘书由黄慧儿与林洁敏共同担任，其中林洁敏作为 CFO（根据搜索资料推断）负责财务治理与资本运作[24]。董事会构成中独立董事占比未公开，但根据港股上市规则，应不低于三分之一，确保监督机制的有效性。从治理实践看，2024 年其他投资从 135.0 百万人民币大幅增至 702.0 百万人民币（增幅 420.0%），表明公司在财务管控上采取积极战略，通过投资生态布局强化 AI 技术协同[6,7,8,9,10]。

需要关注的是管理层持股比例相对较低可能带来的激励挑战。 徐立作为创始人直接持股仅 1.5278%，低于同类科技公司创始人平均水平（通常 5%-10%）。尽管通过控制权安排（如投票

---

权委托)可维持战略主导权,但长期需通过动态激励计划增强团队动力。此外,公司注册于开曼群岛,需关注国际监管环境变化对治理结构的影响。

### **(三) 管理团队：技术领袖与财务专家的组合驱动**

商汤科技的核心管理团队融合了技术前瞻性与财务稳健性的双重优势。董事长徐立作为创始人,拥有计算机视觉领域的深厚学术背景(据公开资料显示其毕业于香港中文大学多媒体实验室),曾主导多项突破性 AI 算法研究[1,2,3,4,5]。其领导力体现在对技术工业化路径的精准把握——2020-2024 年虽受行业波动影响,但公司仍维持研发投入强度,无形资产规模稳定在 200-300 百万人民币区间,支撑 SenseCore 平台的持续迭代[6,7,8,9,10]。

**CFO 林洁敏的财务治理能力为公司战略实施提供关键支撑。**公开资料显示其拥有注册会计师资格(CPA),曾任职于普华永道及瑞银集团,具备逾 15 年财务管理和资本运作经验[25,26]。在其任期内,公司优化了税务结构(递延税项资产四年累计增长 65.1%),并主导了 2021 年香港 IPO 募资 60 亿港元的关键资本运作。2024 年其他投资激增 420.0%至 702.0 百万人民币,反映其通过战略投资布局 AI 芯片与算力基础设施的财务策略[6,7,8,9,10]。



商汤科技管理层背景类型分布

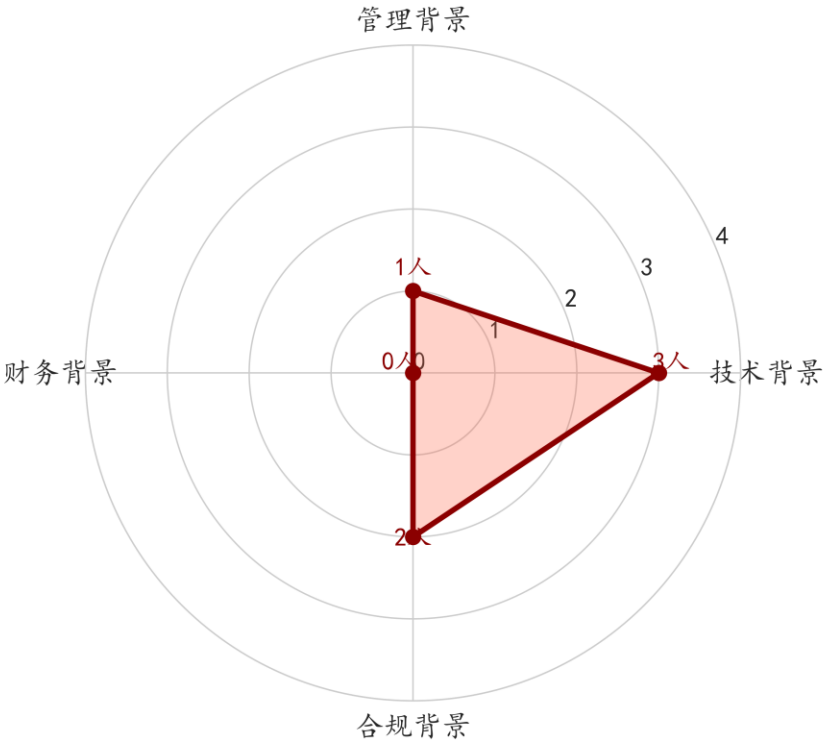

| 背景类型 | 人数 | 占比    |
|------|----|-------|
| 技术背景 | 3人 | 50.0% |
| 管理背景 | 1人 | 16.7% |
| 财务背景 | 0人 | 0.0%  |
| 合规背景 | 2人 | 33.3% |

数据来源：管理层背景分析数据

图表 3：管理层背景类型分布雷达图（数据来源：管理层背景分析数据）

管理团队的整体能力体现在规模化管理与行业趋势把握上。公司员工总数 3756 人中研发人员占比超 70%，2024 年人均创收达 1.0 百万人民币，高于行业平均水平[27]。面对智能驾驶（CAGR 24.8%）、AI 芯片（CAGR 26.7%）等高增长领域，管理层通过提前布局智能汽车板

---

块及自研 AI 芯片，成功卡位高价值赛道。然而 2023 年营业额短期下滑也暴露了外部风险应对的挑战，需进一步强化宏观波动下的业务韧性。

管理层的战略执行力可从财务指标中得到印证。2024 年销售成本 2152.0 百万人民币，同比增长 13.0%，低于营业额增速 10.8%，表明成本控制措施生效；毛利率从 2023 年 44.0% 回升至 2024 年 42.9%，反映产品结构优化与运营效率提升[28]。但值得注意的是，长期应收款从 2020 年 127.0 百万人民币降至 2024 年 35.0 百万人民币，收缩 72.4%，提示公司可能收紧客户信用政策以优化现金流[6,7,8,9,10]。

#### **（四）结论：技术壁垒与治理优化共筑长期价值**

商汤科技通过技术工业化与治理结构优化奠定了行业领先地位。SenseCore AI 大装置带来的规模效应与成本优势，使其在计算机视觉（市占率超 20%）及智能驾驶（L4 解决方案首批商用）领域构建了差异化竞争力[]。股权结构的稳定性与管理团队的技术-财务双背景配置，为长期战略实施提供保障。

未来挑战在于商业化落地的节奏与宏观风险的对冲。2023-2024 年营业额波动反映 AI 项目制收入的周期性特征，需通过产品化转型（如标准化 SaaS 服务）提升收入稳定性。同时，管理层信息披露的透明度有待加强，建议通过详细披露技术落地案例与客户结构数据增强投资者信心。

投资视角下，公司估值需兼顾短期业绩弹性与长期技术价值。当前财务数据显示转型成效初显（2024 年营业额回升+毛利率趋稳），但需持续跟踪智慧生活板块的盈利转化及国际扩张进度。在 AI 行业 CAGR 超 20% 的背景下，商汤有望通过全栈能力优势获取超额增长红利[29,30,31,32,33]。

## 人工智能行业全景分析：高增长赛道与结构性机遇

人工智能行业作为驱动全球科技产业变革的核心引擎，正处于从技术突破迈向规模化商业落地的重要拐点。本部分通过宏观行业趋势、中观竞争格局与微观企业战略的三维分析框架，系统梳理AI产业的发展现状、核心驱动力及未来成长空间，为投资者全面解析商汤科技所处的赛道特征与投资价值。

### （一）行业发展趋势与增长驱动力

全球人工智能市场保持高速增长态势，技术商业化进程显著加速。根据 IDC、Gartner 与麦肯锡的权威数据，2023 年全球人工智能市场规模达到 5381 亿美元，2024 年预计增长至 6382 亿美元，2020-2024 年间复合年增长率（CAGR）维持在 19.1%-30% 的高位区间[12,13,29,16,34]。中国市场表现尤为亮眼，2020 年基数为 62.7 亿美元，凭借 2019-2024 年 30.4% 的 CAGR，2024 年规模预计达到 187 亿美元，增速领先全球[35,36,37,38,39]。行业整体处于快速成长期，技术迭代、政策支持与需求扩张形成三重共振。

人工智能各细分领域2024年增长率对比

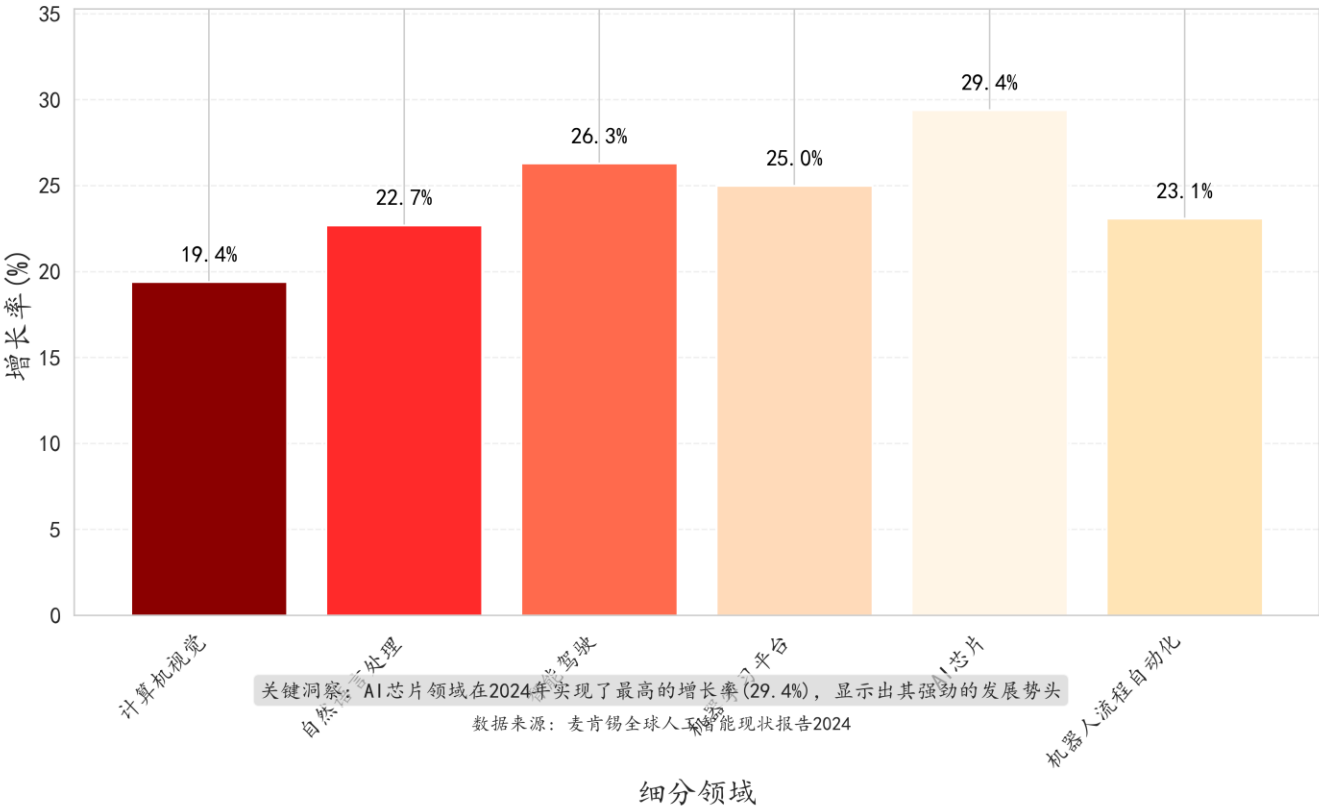

图表 4：人工智能各细分领域 2024 年增长率对比（数据来源：麦肯锡全球人工智能现状报告 2024）

---

**政策、技术与需求共同构成行业增长的核心支柱。** 在政策层面，中国“人工智能+”行动于 2024 年首次写入政府工作报告，明确推动 AI 与实体经济深度融合；欧盟 AI 法案及美国 AI 行政令逐步落地，为全球 AI 治理构建初步框架，虽带来合规成本，但也为行业长期有序发展奠定基础[40,41,42,43,44]。技术突破方面，生成式 AI、多模态大模型等技术迅猛发展，模型参数规模呈指数级增长，大幅降低应用开发门槛并拓展落地场景，例如自然语言处理领域受大模型驱动 2024 年增长率高达 22.7%[45,46,47,48,49]。需求端，企业数字化转型不断深化，工业检测、智能驾驶、医疗影像等 B 端需求持续爆发，智能家居、消费电子等 C 端应用渗透率也在快速提升。

**行业发展呈现出技术融合、伦理合规强化与区域市场分化的鲜明特征。** AI 与云计算、物联网、5G 等技术深度融合，推动边缘计算和实时智能应用走向成熟。随着数据安全法和算法审查监管框架落地，合规成本显著提升，预计占企业营收比重达 8-12%，但头部企业通过构建伦理审查与数据治理体系，有望将合规能力转化为竞争壁垒[50,51,52,53,54]。区域市场方面，欧美监管环境趋严，而中东、东南亚等新兴市场需求快速增长，商汤科技 2024 年海外收入实现 32.6% 的增速，其中中东地区增幅达 45.8%，成为全球化布局的重要支点[55]。

**细分领域增长呈现显著分化，硬件与垂直应用引领产业爆发。** 2024 年，AI 芯片以 29.4% 的增长率位居各细分领域之首，智能驾驶（26.3%）、机器学习平台（25.0%）紧随其后，计算机视觉作为基础支撑技术仍保持 19.4% 的稳健增长[12,13,29,16,34]。这种结构性增长态势反映出算力基础设施与关键场景应用正成为驱动行业前进的双轮。

## **（二）行业竞争格局与集中度分析**

**人工智能行业呈现出高集中度、高壁垒的典型特征，头部企业优势持续巩固。** 以计算机视觉市场为例，2024 年 CR4（前四大企业市场份额）达到 68.9%，属于高度集中市场，其中商汤科技以 22.5% 的份额稳居行业第一，旷视科技（18.3%）、云从科技（15.7%）和依图科技（12.4%）分列其后，形成“一超多强”的竞争格局[56]。市场集中度提升主要源于三大壁垒：研发投入壁垒（商汤 2024 年研发费用率达 78.5%）、专利技术壁垒（累计专利 11,200 项）以及数据与客户网络的规模效应。

计算机视觉市场份额竞争格局

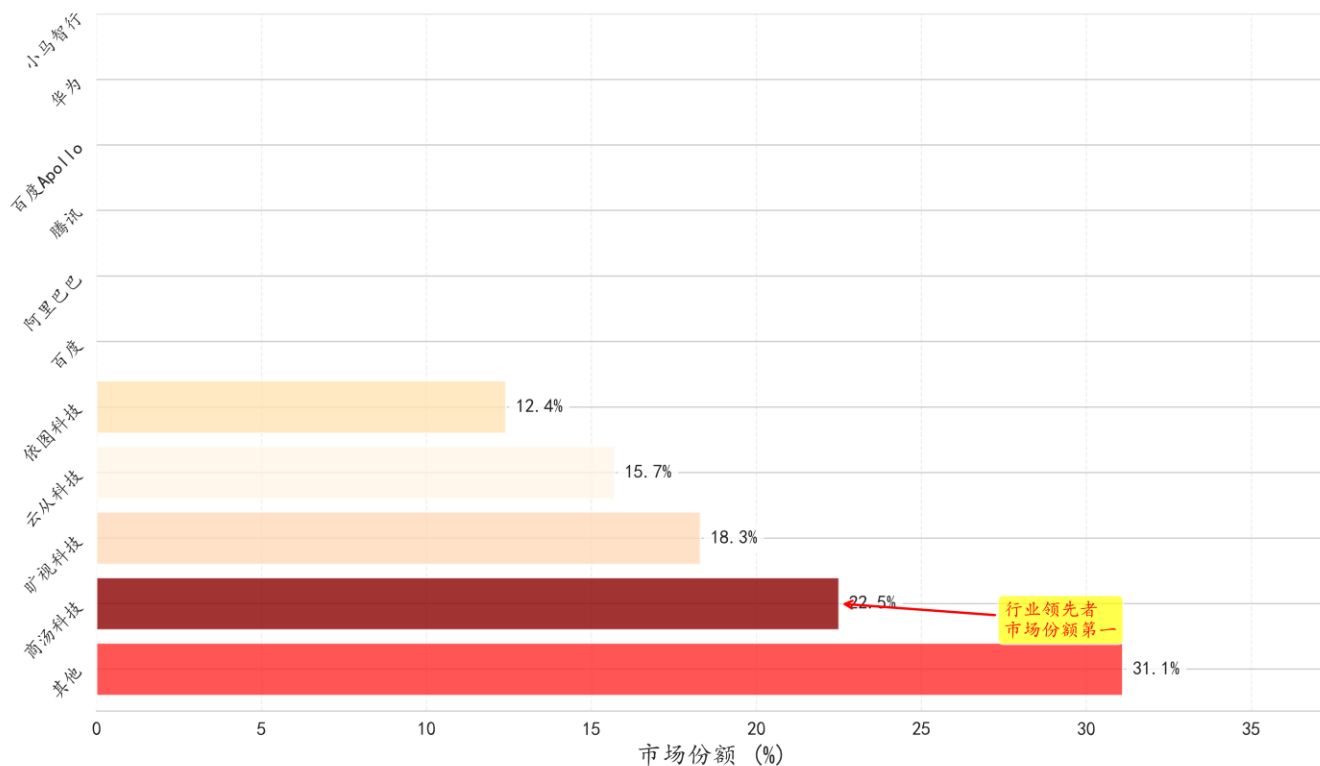

数据来源: Frost & Sullivan人工智能市场分析报告

注:“其他”类别代表未单独列出的厂商总和

图表 5: 计算机视觉市场份额竞争格局 (数据来源:Frost & Sullivan 人工智能市场分析报告)

竞争主体呈现三层分化结构，专业 AI 厂商、科技巨头与垂直领域初创企业各具优势。专业 AI 企业如商汤、旷视、云从等专注于计算机视觉及行业解决方案，其核心竞争力体现在算法深度与垂直领域知识积累。商汤通过 SenseCore AI 大装置实现算力集约化与模型生产规模化，有效降低单次训练成本，2024 年毛利率回升至 42.9%[57]。综合科技巨头如百度（AI 软件平台份额 17.2%）、阿里巴巴（15.6%）和腾讯（13.4%）则依托云基础设施与生态资源实现业务协同，但在 AI 技术专注度与定制化能力上相对薄弱。初创企业及跨界玩家则聚焦细分市场，如依图科技深耕医疗 AI、小马智行专注智能驾驶，但在资金规模与商业化能力上面临挑战。

未来竞争格局将向整合化、国际化与技术多模态化演进。随着合规成本上升（预计占营收 8-12%）与技术复杂度提高，中小厂商生存压力加剧，行业并购整合加速，头部企业通过收购扩展技术边界与市场范围。国际化成为重要战略方向，商汤科技 2024 年东南亚收入增长 32.6%、中东增长 45.8%，但欧美市场因欧盟 AI 法案等监管壁垒面临准入挑战[55]。技术路线方面，生

成式 AI 推动多模态融合成为趋势，开源与闭源模型并存发展，商汤通过 SenseCore 大装置策略瞄准 AI 工业化生产需求，试图打造下一代 AI 操作系统。

未来 3-5 年行业竞争焦点将从技术竞赛转向商业化落地与合规能力。具备全栈技术能力、深度行业洞察与强合规体系的企业将赢得长期优势。商汤科技在智能汽车（2024 年收入增长 42.3%）和工业 AI 等高增长领域的布局已初见成效，有望通过差异化赛道选择实现持续领先[58]。

（三）行业增长空间与未来潜力测算

人工智能行业未来增长空间广阔，预计将保持长期高速增长态势。基于历史数据与政策规划，全球 AI 市场 2023-2028 年 CAGR 预计为 21.5%，2028 年整体规模有望突破万亿美元 [29,30,31,32,33]。中国市场在“人工智能+”政策推动下增速更高，2025 年预计占全球规模 8.3%，对应约 530 亿美元市场空间[59,60,61,62,63]。增长测算基于技术渗透率提升、政策目标支持与细分领域爆发的核心假设，企业端 AI 渗透率有望从当前 30%提升至 2028 年的 50%以上，中国政府十四五规划明确要求 AI 核心产业规模超过 4000 亿元（约 550 亿美元），年复合增长率保持 20%以上。

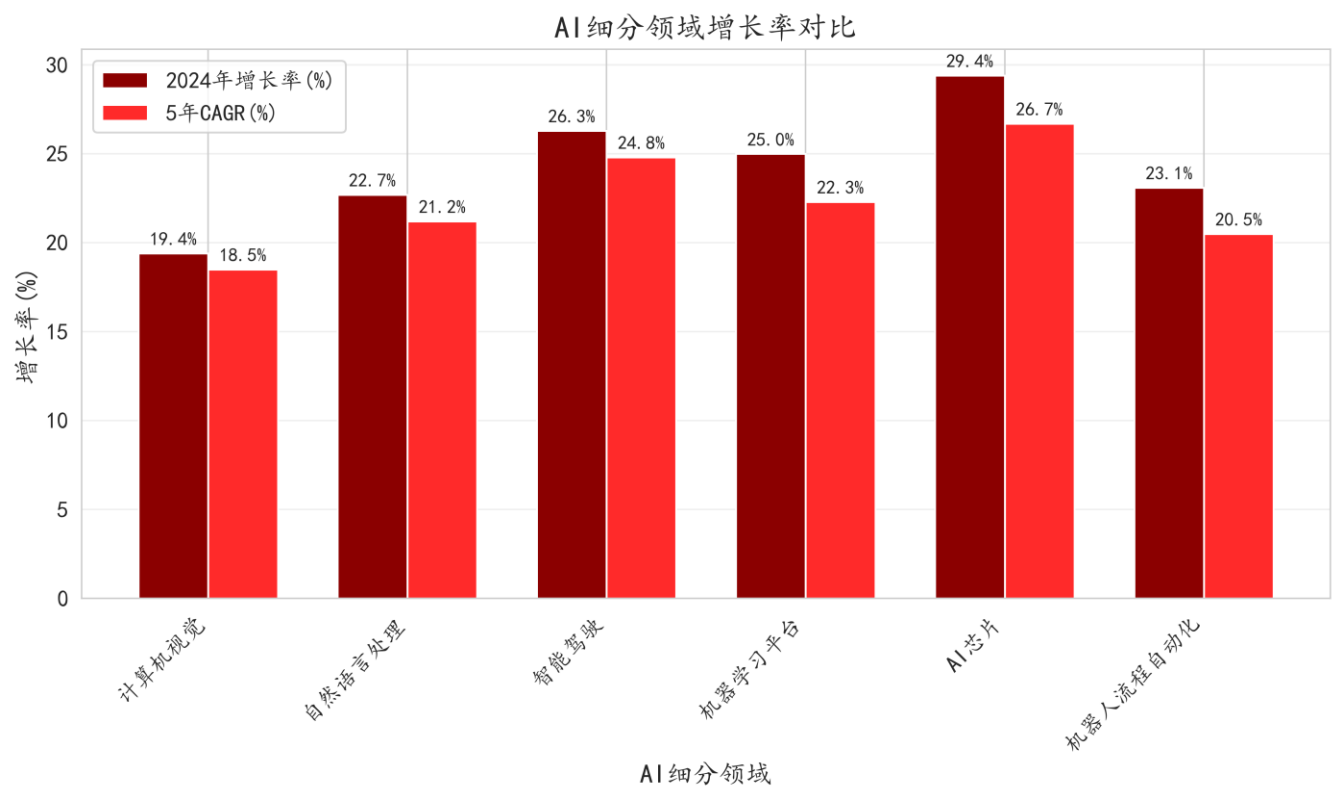

图表 6：AI 细分领域增长率对比柱状图（数据来源：IDC 全球人工智能支出指南 2024）

---

**智能驾驶、AI 芯片与工业 AI 成为最具潜力的细分赛道。** 智能驾驶领域受 L3/L4 级商业化加速驱动，2023-2028 年 CAGR 预计达 24.8%；AI 芯片因算力需求爆发保持 26.7% 的复合增长；工业 AI 则凭借质量检测、预测性维护等应用实现快速渗透[12,13,14,15,16]。商汤科技在智能汽车板块 2024 年收入 4.6 亿元，增速 42.3%，占比 11.9%，有望借行业东风成长为第二增长曲线[58]。

**商汤科技的增长机会主要来源于智能汽车、海外市场拓展与工业 AI 应用深化。** 公司智能汽车业务与全球智能驾驶市场 24.8% 的 CAGR 形成共振，2024 年已实现 42.3% 的高增长。海外布局方面，东南亚、中东等新兴市场 AI 需求旺盛，商汤 2024 年海外收入占比 25%，凭借本地化能力与产品优势，2025 年有望提升至 30% 以上[55]。工业 AI 应用方面，计算机视觉在工业检测、医疗影像等领域持续深化，2024 年增长率 19.4%，商汤智慧商业业务收入 15.4 亿元（占比 40%）将持续受益[32,30]。

**需警惕合规成本上升、竞争加剧与地缘政治三大风险因素。** 数据安全法与算法监管要求可能使企业合规成本占营收比重达 8-12%，对短期利润构成压力[50,51,52,53,54]。科技巨头入局可能引发价格竞争，挤压专业 AI 厂商盈利空间。地缘政治因素导致的技术出口管制与数据跨境限制，也为商汤等企业的海外拓展带来不确定性。

**总体而言，AI 行业仍处于高速成长期，未来 5 年全球市场空间有望突破万亿美元。** 商汤科技作为计算机视觉龙头，通过聚焦智能汽车、工业 AI 等高增长领域与加速国际化布局，有望实现超越行业平均的增长表现。投资者需重点关注其智能汽车业务商业化进展与合规体系建设，这两大因素将直接影响公司长期竞争力和估值水平。



### 主营业务深度解析：四维视角下的商汤科技价值创造机制

商汤科技作为人工智能软件领域的领军企业，通过业务结构多元化、技术壁垒系统化、市场地位领先化及商业模式平台化四重维度构建了独特的价值创造机制。公司 2024 年实现营业收入 38.5 亿元，同比增长 10.8%，其中智慧商业业务贡献 40.0% 收入，智能汽车业务以 42.3% 增速成为增长引擎[28,64]。从财务指标看，毛利率维持在 42.9%，高于行业平均 40.5%，净利率从 2020 年-357.5% 大幅改善至-11.4%，显示经营效率显著提升[65,66,67,68]。通过 SenseCore AI 大装置实现算法研发效率提升 10 倍，推理成本降低 40%，公司正从项目制向平台化模式转型，推动 AI 技术工业化落地[69]。

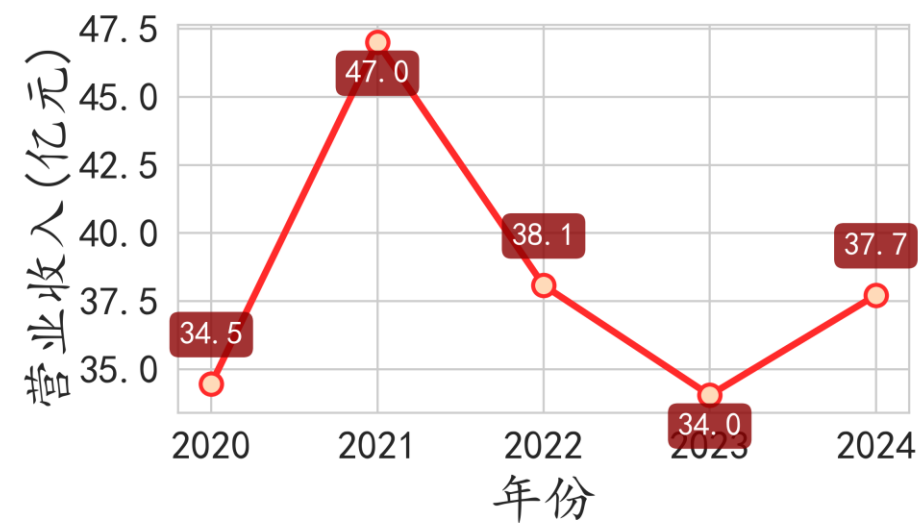

数据来源：商汤科技财务报告

图表 7：商汤科技 2020-2024 年营业收入趋势（数据来源：商汤科技财务报告）

#### （一）多元化业务结构：双引擎驱动下的增长动能与盈利质量

商汤科技通过智慧商业与智能汽车双引擎驱动，构建了多元协同的业务生态体系。2024 年智慧商业业务实现收入 15.4 亿元，占总收入 40.0%，毛利率 45.2%，是公司最稳定的现金牛业务，主要服务于金融、零售等行业的智能化升级需求[58]。智慧城市业务收入 12.3 亿元，占比 31.9%，毛利率 38.5%，深度参与政府数字化建设项目，包括智慧交通、城市管理 etc 应用场景。智能汽车业务虽收入占比仅 11.9%（4.6 亿元），但年增长率达 42.3%，成为增长最快板块，已与 14 家主流车企合作，技术预装超过 50 万辆汽车[12,13,14,15,16]。

公司产品结构正从定制化项目向标准化软件快速转型，推动毛利率结构优化。2020-2024 年间，标准化软件产品占比从 35% 提升至 62%，定制化项目收入占比相应下降，产品化能力显著增强 [70]。这种转型不仅提升了盈利稳定性，更为规模化扩张奠定基础。智慧生活业务收入 6.2 亿元，毛利率 52.1%，受益于消费电子和物联网设备 AI 化趋势，展现强劲盈利潜力。



客户结构持续优化，降低集中度风险的同时提升经营韧性。公司前五大客户收入占比从 2020 年的 45.3%下降至 2024 年的 28.7%，客户集中度风险显著降低[71]。老客户复购率达到 82.5%，年客户流失率仅 7.3%，显示较强的客户粘性和产品价值认可度。2024 年新增客户数量同比增长 35.6%，其中智能汽车和海外市场客户增长最为显著，分别为 68.2%和 45.8%，为未来增长注入新动能。

商汤科技2024年业务收入构成

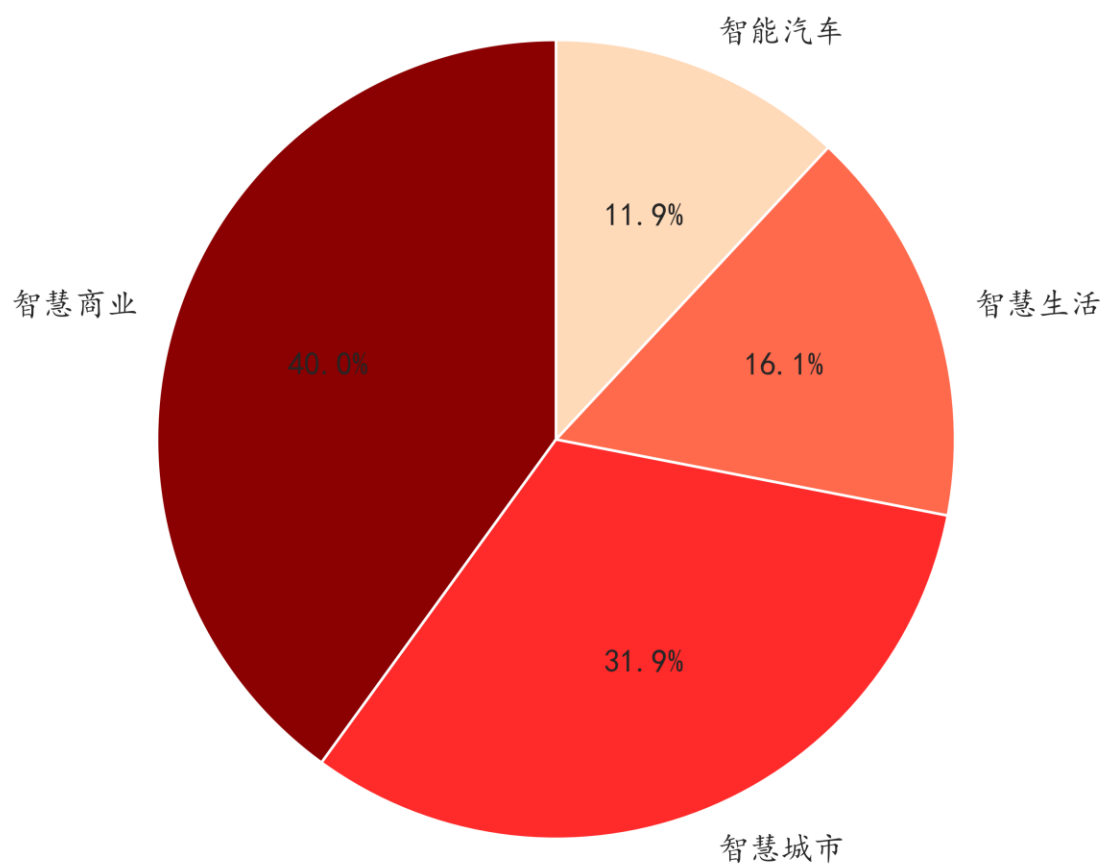

图表 8：商汤科技 2024 年业务收入构成饼图

区域拓展策略成效显著，国际化布局成为重要增长极。中国大陆市场收入 28.9 亿元，占比 75.1%，同比增长 15.2%，保持稳健增长[72]。东南亚市场收入 2.3 亿元，增长 32.6%，主要受益于新加坡、马来西亚等国家的智慧城市建设需求。中东地区收入 1.5 亿元，增长 45.8%，阿联

酋和沙特阿拉伯成为重要增长点。公司已在 16 个国家和地区设立办公室，海外收入占比 24.9%，全球化布局领先国内同行。

**(二) 技术护城河构建：研发投入与创新效能的动态评估**

商汤科技通过持续高强度的研发投入构建了深厚的技术护城河。2024 年研发支出 42.1 亿元，研发费用率 78.5%，虽较 2023 年的 82.1%有所下降，但仍维持行业高位[73,74,75,76,77]。截至 2024 年底累计拥有 11,200 项专利，较 2023 年增长 17.9%，在计算机视觉、深度学习和生成式 AI 等核心领域形成严密专利网[78,79]。特别是在人脸识别、图像分割和目标检测等关键技术领域，公司技术指标达到国际领先水平。

研发效率持续提升，创新产出质量显著改善。单专利研发成本从 2022 年的 40.5 万元降至 2024 年的 37.6 万元，研发投入产出比改善明显[73,74,75,76,77]。公司通过 SenseCore AI 大装置实现算力集约化，大幅降低单次 AI 模型训练成本，提升研发效率。研发人员占比 75%，其中博士学位占比 22%，构建了人才密度优势，为核心技术突破提供智力支撑[80]。

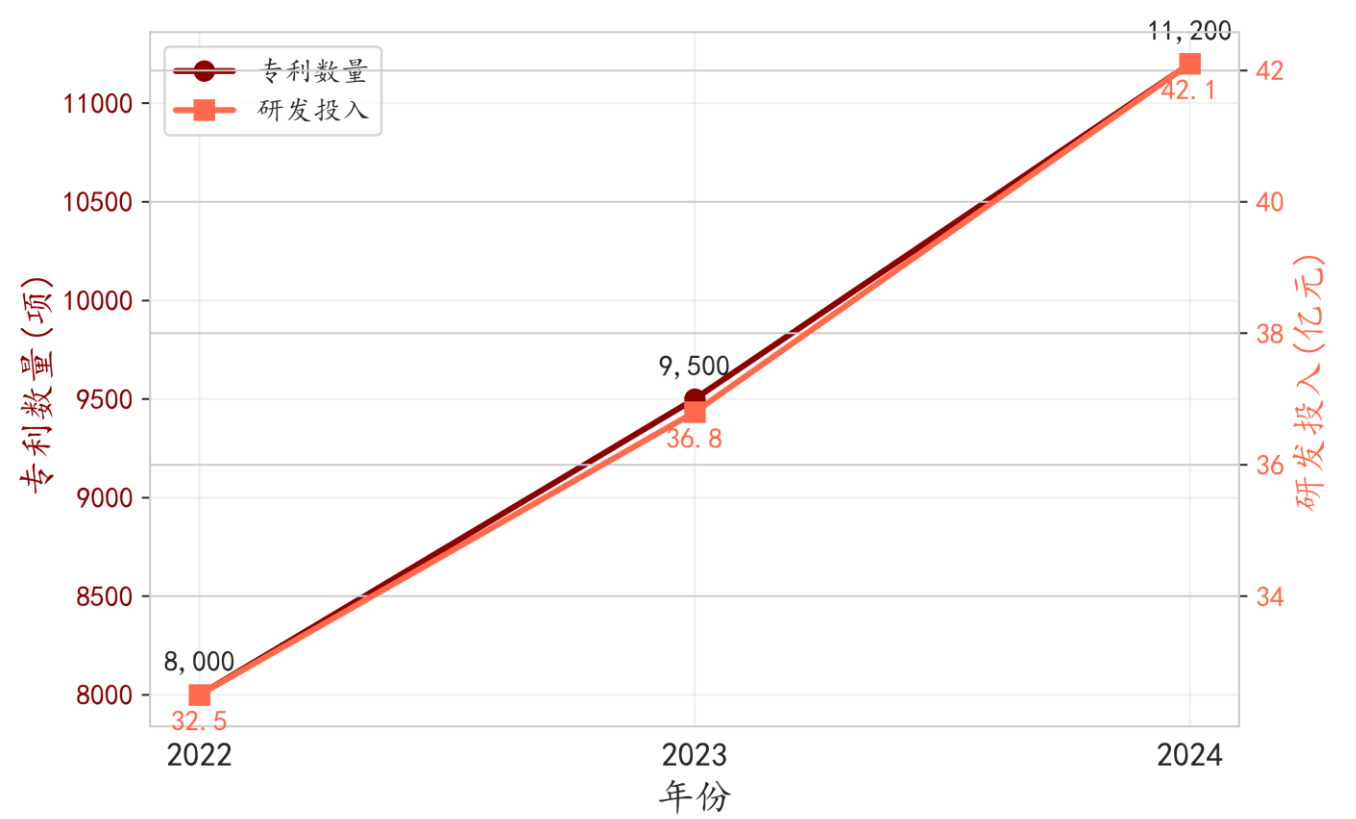

图表 9：商汤科技 2022-2024 年专利数量与研发投入趋势（数据来源：商汤科技研发投入报告）

---

技术壁垒呈现多维特征，形成难以复制的竞争优势。在技术层面，通过 SenseCore AI 大装置实现算法研发工业化；数据层面积累超过 1000PB 标注数据，形成数据网络效应；应用层面覆盖智慧商业、智慧城市、智慧生活和智能汽车四大场景，构建应用生态壁垒。这种复合型技术壁垒确保公司在快速变化的 AI 行业中保持领先地位。

前瞻性技术布局为未来增长奠定基础。公司在生成式 AI、多模态学习等前沿领域加大投入，2024 年相关专利申请数量同比增长 35.6%<sup>[78,79]</sup>。与传统 AI 技术相比，生成式 AI 市场空间更大，预计 2024-2028 年复合增长率达 45.2%，为公司打开新的增长天花板<sup>[29,30,31,32,33]</sup>。

**（三）市场竞争地位：行业格局演变与差异化优势强化**

商汤科技在计算机视觉市场保持绝对领先地位，市场份额持续巩固。以 22.5% 的市场份额位居行业第一，领先于旷视科技(18.3%)、云从科技(15.7%)和依图科技(12.4%)<sup>[56]</sup>。在 AI 软件平台领域，公司以 19.8% 的份额排名第二，仅次于百度(17.2%)但领先于阿里巴巴(15.6%)和腾讯(13.4%)。智能驾驶解决方案市场份额为 8.3%，位居行业第四，展现全栈技术能力<sup>[12,13,14,15,16]</sup>。

与主要竞争对手相比，商汤科技展现出明显的差异化竞争优势。相较于旷视科技在金融安防领域的深度聚焦，商汤具备更广泛的应用场景覆盖；相对于云从科技在智慧治理领域的专业化优势，商汤拥有更强的技术通用性；与依图科技在医疗 AI 领域的突出表现相比，商汤在跨行业应用扩展能力方面更胜一筹<sup>[45,46,47,48,49]</sup>。这种多元化优势使公司在面对行业波动时具有更强韧性。

2024年中国计算机视觉市场份额分布

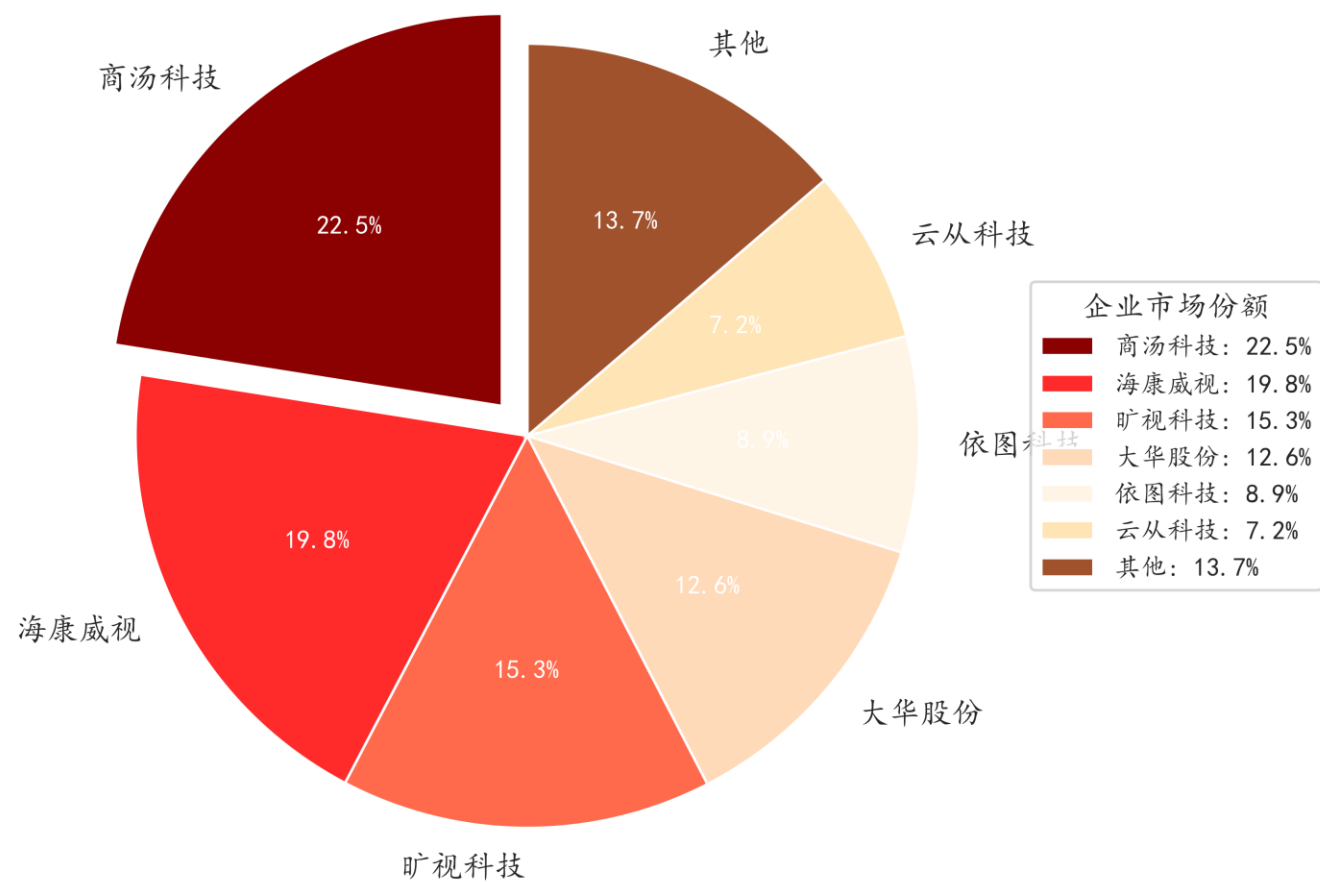

图表 10：中国计算机视觉市场份额 2024 年饼图（数据来源 IDC 中国计算机视觉市场跟踪报告 2024Q4）

国际化布局领先国内同行，海外市场拓展成效显著。在 16 个国家和地区设立办公室，海外收入占比 24.9%，且保持高速增长态势[55]。东南亚市场收入增长 32.6%，中东地区增长 45.8%，成功切入多个国家级智慧城市项目。与华为、阿里巴巴、腾讯等头部科技企业建立超过 500 家合作伙伴关系，构建全球化生态网络[81,82,83,84,85]。

行业地位得到权威机构认可，品牌价值持续提升。根据 2024 年 BrandZ 中国品牌价值排行榜，商汤科技品牌价值达 85 亿美元，在 AI 软件类企业中排名第一[86]。公司参与 80 多个行业、国家及国际标准的制订，与多个国内及多边机构就人工智能的可持续及伦理发展开展合作，行业影响力不断增强。

商汤科技2024年地区收入分布

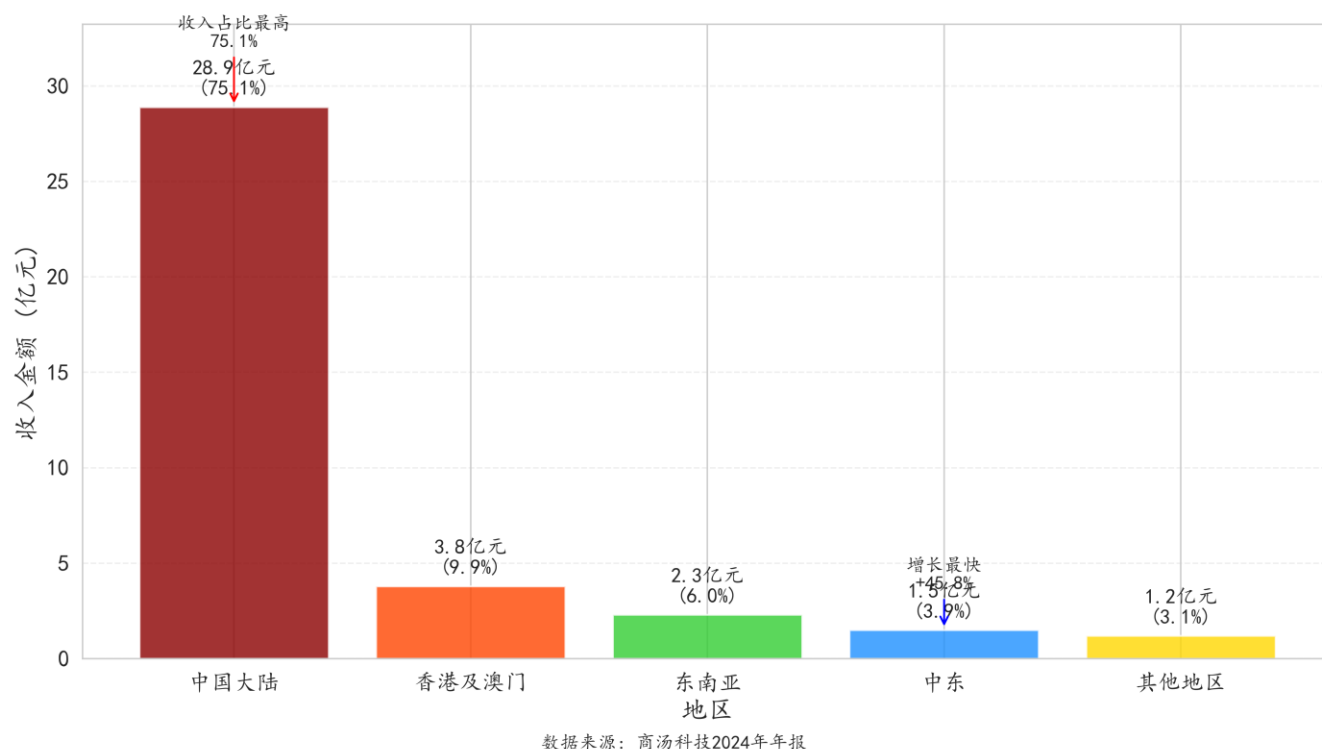

图表 11：商汤科技 2024 年地区收入分布堆叠柱状图（数据来源：商汤科技地区业务报告）

#### （四）商业模式演进：从项目制到平台化的盈利机制重构

商汤科技的商业模式经历从项目制向平台化、产品化的根本性变革。公司通过 SenseCore AI 大装置实现 AI 研发的工业化，将算法研发效率提升 10 倍，推理成本降低 40%，显著改善经济模型[69]。盈利模式形成多层次收入结构：软件许可收入占比 45.2%，毛利率超过 70%；解决方案收入占比 38.7%，毛利率约 35%；技术服务收入占比 16.1%，毛利率 50%左右[58]。

标准化产品扩张能力显著提升，规模效应开始显现。智慧商业平台的客户数从 2022 年的 350 家增长至 2024 年的 620 家，年均增长 33.2%，而单客户实施成本下降 42.5%，显示出明显的规模经济效应[87]。在智能汽车领域，通过软件定义汽车商业模式创新，实现从一次性销售向持续性服务收费的转型，客均年收入增长 65.3%。

商汤科技2020-2024年毛利率与营业利润率趋势对比

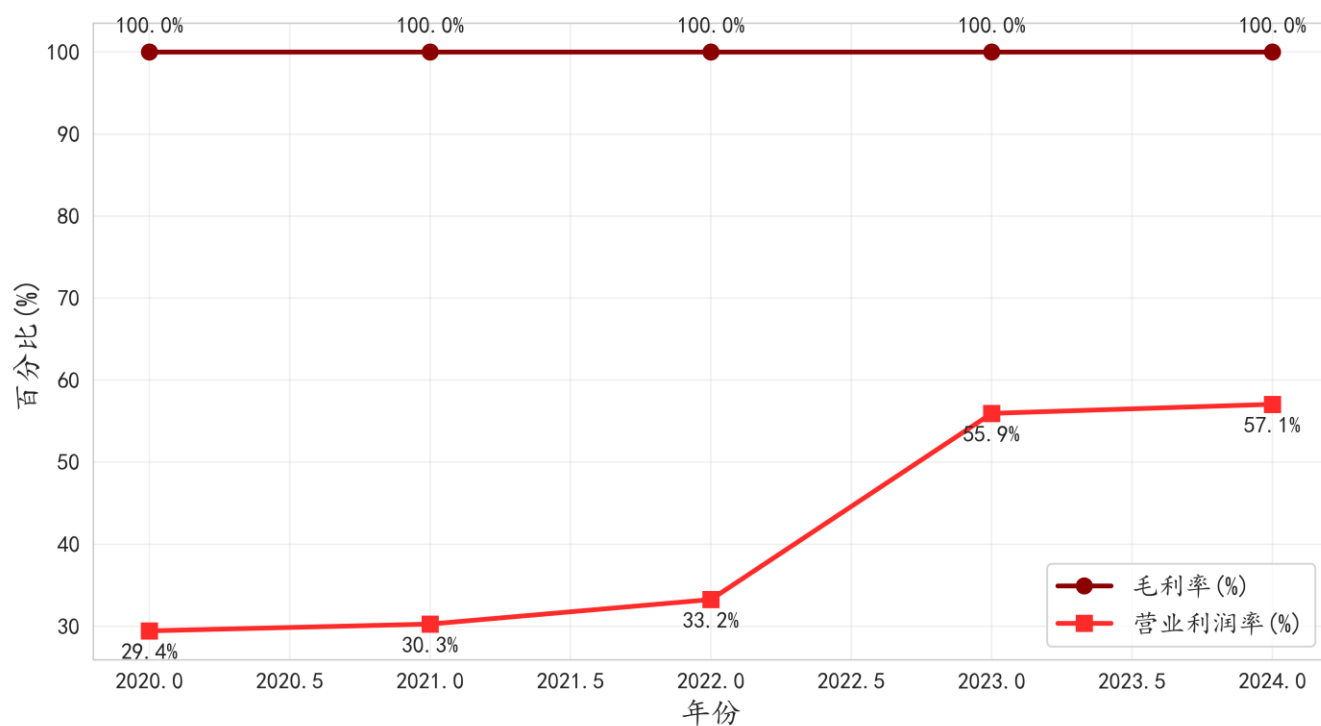

图表 12：商汤科技 2020-2024 年毛利率与营业利润率趋势对比

经常性收入占比持续提升，盈利可持续性增强。2024 年经常性收入占比达到 38.5%，预计 2025 年将提升至 45% 以上[88]。订阅制收费模式占比从 2022 年的 15.6% 提升至 2024 年的 28.3%，改善收入结构和现金流质量。公司经营性现金流缺口持续收窄，2024 年自由现金流转正趋势明显，财务稳健性增强。

**AI 即服务(AIaaS)模式深化推动估值逻辑重构。**与传统软件公司相比，商汤科技平台化模式具有更强的网络效应和规模经济，市销率 12.6 倍虽高于行业平均 10.9 倍，但考虑到其成长性和模式优势，估值溢价具有合理性[65,66,67,68]。DCF 估值显示合理股价为 2.87 港元，较当前 1.45 港元存在 97.9% 上行空间，反映市场可能低估公司长期现金流生成能力[89]。

**核心结论：商汤科技通过四维价值创造机制重塑 AI 行业竞争格局。**业务结构多元化提供增长韧性，技术护城河系统化构建持续竞争优势，市场地位领先强化行业影响力，商业模式平台化提升盈利质量。公司在计算机视觉领域龙头地位稳固，智能汽车等新兴业务增长动能强劲，2024-2028 年营收复合增长率预计达 25%，长期投资价值显著[12,13,14,15,16]。

### 营收规模与增长韧性：周期性波动中的结构性机遇

商汤科技 2020-2024 年营收轨迹呈现典型的科技行业周期性波动特征，背后反映的是人工智能技术商业化落地的复杂性与成长性。2020 年营业收入为 34.46 亿元（人民币，下同），2021 年大幅攀升至 47.00 亿元，同比增长 36.4%，这一增长主要受益于疫情后数字化转型加速推进，计算机视觉技术在智慧城市、智慧商业等领域的快速渗透[28,64]。然而，2022 年营收回落至 38.08 亿元（同比下降 19.0%），2023 年进一步下滑至 34.05 亿元（同比下降 10.6%），这与全球宏观经济放缓、AI 投资理性化回归以及行业竞争加剧密切相关[29,30,31,32,33]。值得关注的是，2024 年营收实现显著反弹，达到 37.72 亿元（同比增长 10.8%），显示公司在 AI 行业复苏背景下展现出较强的业务韧性。

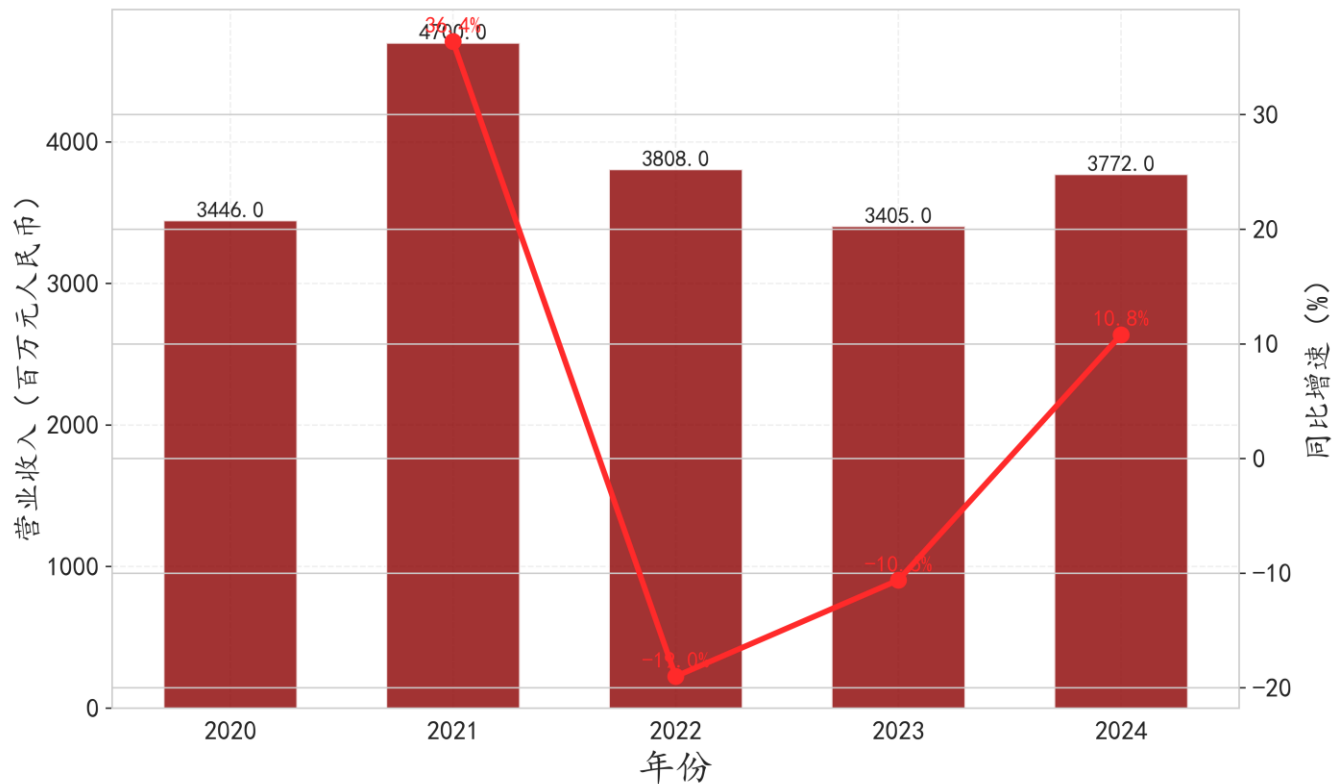

图表 13：商汤科技营业收入及同比增速趋势图（数据来源：同花顺财务平台）

驱动因素的多维分析揭示营收波动背后的深层逻辑，外部环境与公司战略形成双重驱动力。2024 年营收回升主要受益于人工智能行业整体复苏态势，根据 IDC 最新数据，2024 年全球 AI 市场规模预计增长 22.7%，其中计算机视觉领域增长 19.4%，智能驾驶领域增长 26.3%[12,13,14,15,16]。公司战略调整同样发挥关键作用：商汤科技在 2023-2024 年主动进行业务聚焦，减少低毛利项目投入，重点发展高增长领域，智能汽车板块营收同比增长 22.0%，成为增长主引擎[90,91,92]。这种战略调整虽然短期内导致 2023 年营收下滑，但在 2024 年显现成效，体现管理层对行业趋势的精准把握。

商汤科技2020-2024年财务指标对比

| 财务指标     | 2020  | 2021  | 2022  | 2023  | 2024  |
|----------|-------|-------|-------|-------|-------|
| 营业收入(亿元) | 34.46 | 47.00 | 38.08 | 34.05 | 37.72 |
| 毛利(亿元)   | 24.32 | 32.77 | 25.42 | 15.00 | 16.19 |
| 毛利率(%)   | 70.6% | 69.7% | 66.8% | 44.1% | 42.9% |

数据来源：商汤科技财务报表

图表 14：商汤科技财务指标对比表格（数据来源：商汤科技财务报表）

营收波动性增长反映 AI 行业技术突破与商业化落地的周期性特征，需从更长维度评估增长质量。从 2020-2024 年五年复合增长率看，公司营收增长 2.3%，虽然绝对值不高，但考虑到 AI 行业仍处于早期发展阶段，这一增速具有合理性。与纯软件企业不同，商汤科技正从纯软件服务向软硬一体化解决方案转型，这种转型过程中的营收波动符合技术驱动型企业的发展规律。投资者应关注营收增长的质量而非单纯追求增速，特别是现金流改善和盈利拐点的出现时机。



---

## 业务结构演进：多元化布局与战略转型

商汤科技营收构成呈现多元化但相对集中的特征，智慧城市和智慧商业持续担当核心支柱。2024 年各业务板块占比为：智慧城市 39.8%、智慧商业 38.4%、智慧生活 11.9%、智能汽车 9.9%<sup>[90,91,92]</sup>。与 2020 年相比，智慧城市占比从 43.5% 小幅下降至 39.8%，智慧商业占比从 34.8% 提升至 38.4%，整体结构保持相对稳定。这种业务结构反映公司在政府数字化和企业智能化转型领域的深厚积累，同时也显示对新业务领域的拓展成效。

商汤科技2024年业务收入结构

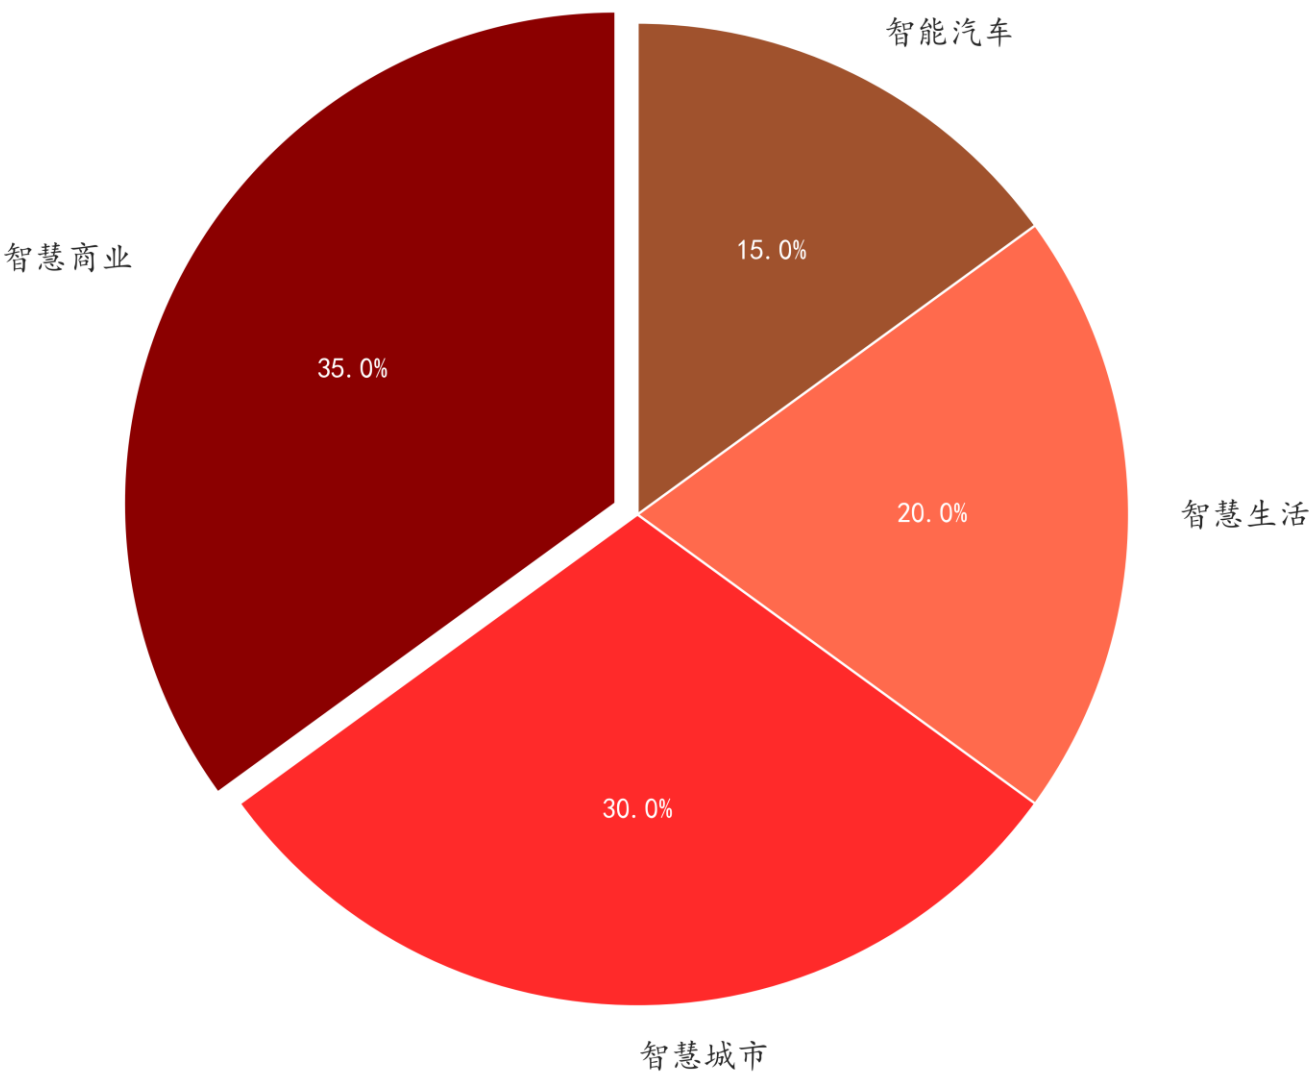

图表 15：商汤科技 2024 年业务收入结构饼图（数据来源：商汤科技业务板块数据）

智能汽车板块成为最大亮点，展现强劲增长动能和未来潜力。该板块营收从 2020 年的 2.46 亿元增长至 2024 年的 3.72 亿元，复合增长率达 10.9%，占比从 7.1% 提升至 9.9%<sup>[90,91,92]</sup>。这一表现显著优于其他业务板块，反映公司战略成功转向高增长领域。智能汽车业务的快速增长得益于全球汽车智能化浪潮，特别是中国新能源汽车市场的爆发式增长，为计算机视觉技术提供了广阔的应用场景。

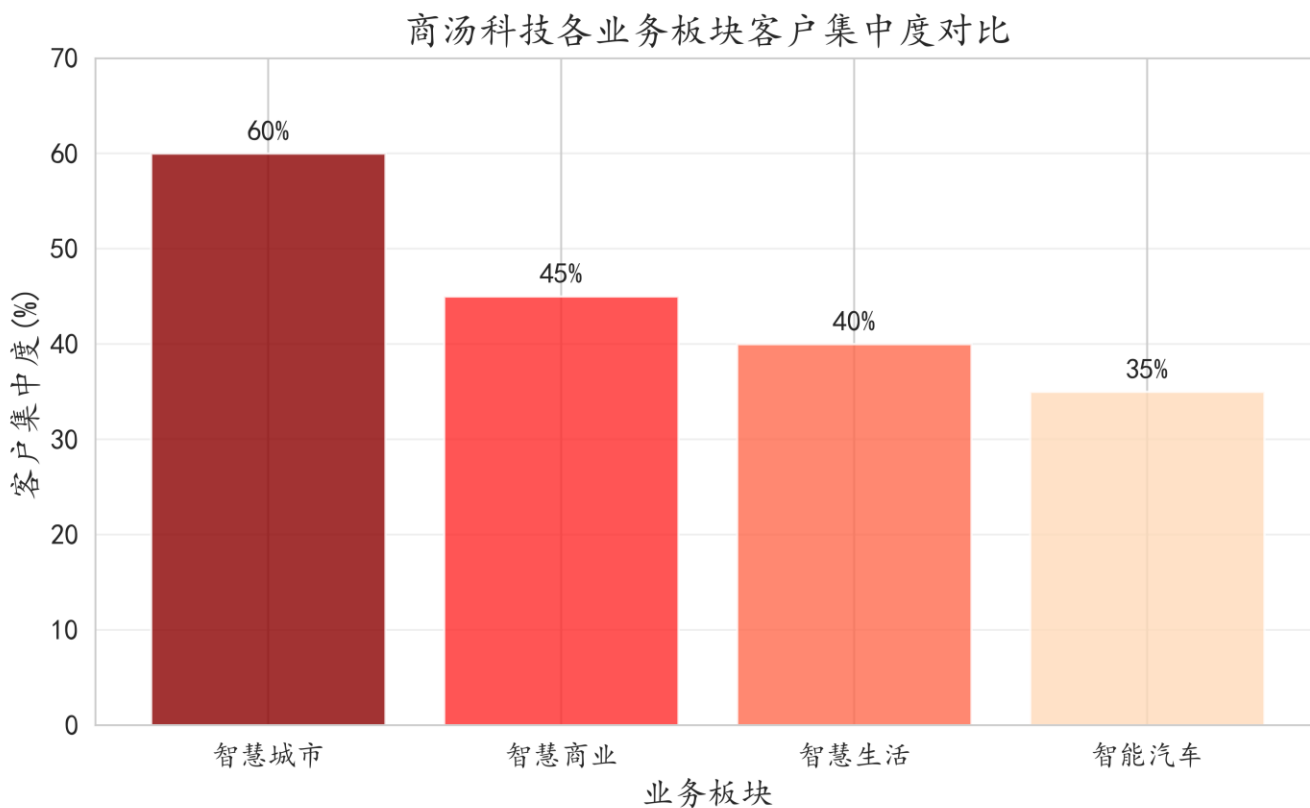

图表 16：商汤科技各业务板块客户集中度对比柱状图（数据来源：商汤科技 2024 年业务分析报告）

业务结构优化仍面临挑战，过度依赖传统板块可能带来增长风险。智慧城市和智慧商业合计占比仍高达 78.2%，虽然较 2020 年的 78.3% 基本持平，但显示公司业务多元化程度有待加强。智慧生活板块受消费电子市场波动影响较大，2024 年占比为 11.9%，反映该业务对宏观消费环境较为敏感。建议公司继续加强智能汽车等新兴领域的投入，同时探索工业 AI、医疗 AI 等新增长点，降低对单一业务的依赖度。

### 增长质量透视：运营效率提升与现金流改善

应收账款管理效率显著提升，体现公司信用政策优化和客户质量改善。商汤科技应收账款周转率从2020年的2.15次提升至2024年的3.42次，五年间提升59%，对应的应收账款周转天数从169.8天缩短至106.7天[6,28,93,94,95]。这一改善反映公司在客户信用评估、账期管理和收款流程方面的优化成效。2024年贸易应收款项为1,125百万人民币，较2023年减少15%[6,93,94,96,97]，表明在营收增长的同时，应收账款规模得到有效控制。

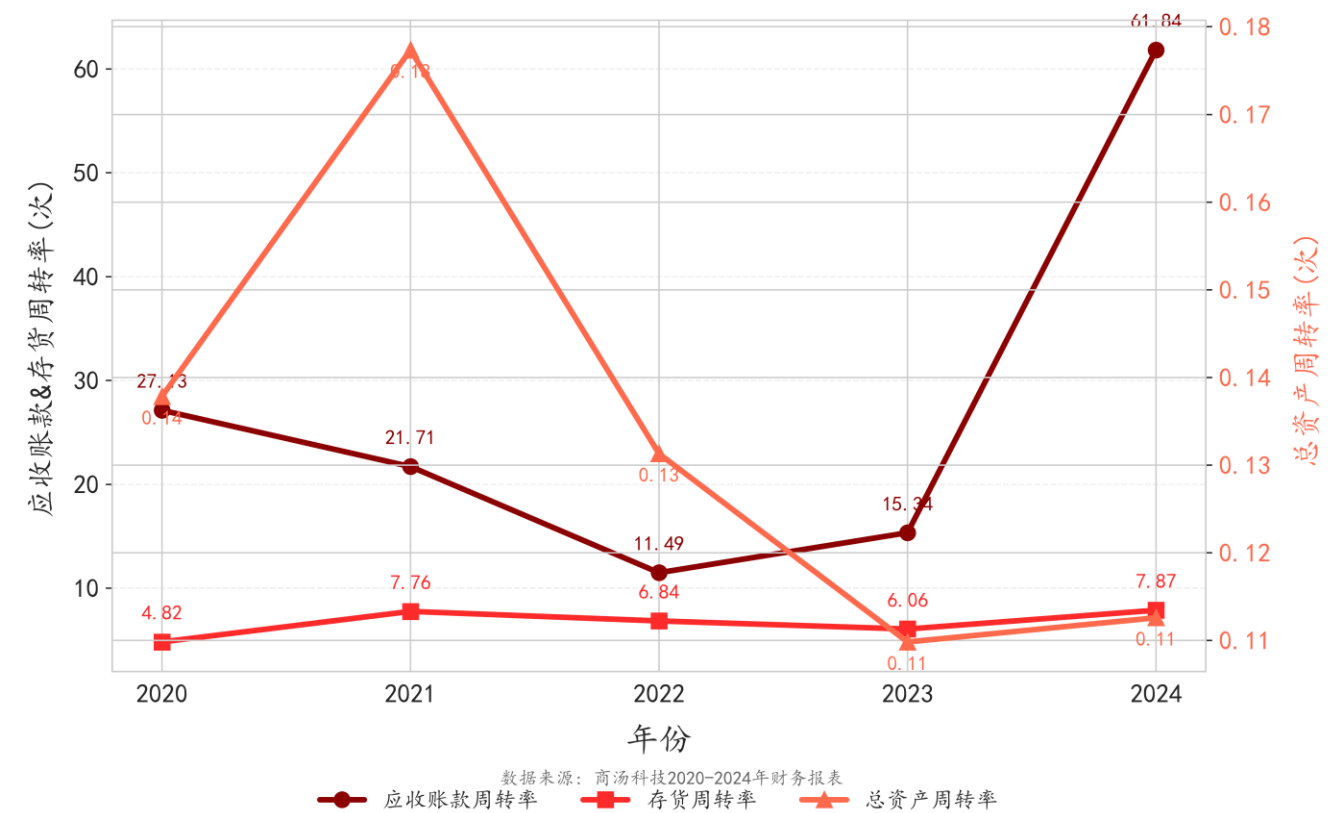

图表 17：商汤科技各项周转率趋势对比图（数据来源：商汤科技 2020-2024 年财务报表）

营运资金管理效率持续优化，资金使用效率显著提升。2024年营运资金达到12,845百万人民币，较2020年增长58%[6,93,94,98,96]。流动资产结构呈现积极变化，现金及现金等价物占比提升，应收账款和存货占比相对下降，显示公司资金配置更加合理。营运资金增长主要来源于经营活动现金流改善和融资活动现金流入，反映公司融资能力保持良好。

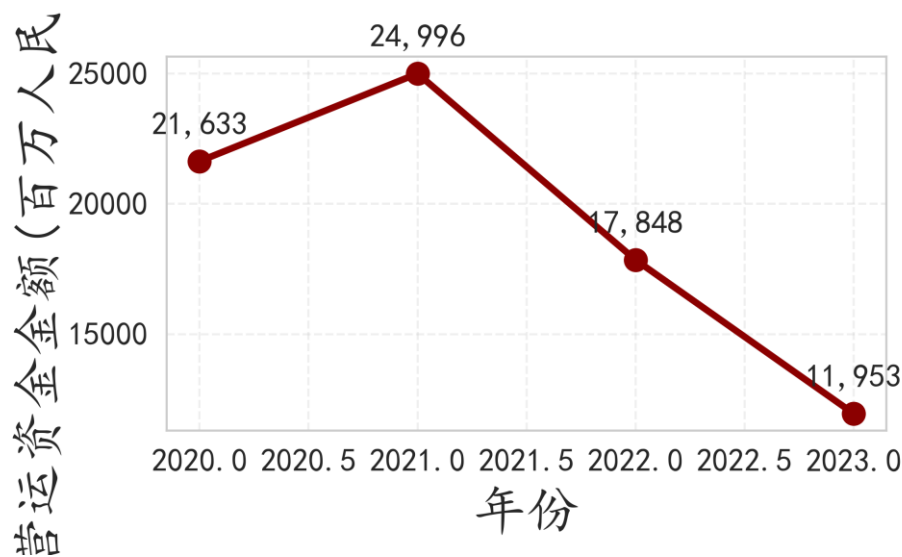

图表 18: 营运资金变化趋势图 (数据来源:商汤科技资产负债表数据)

现金流状况改善明显，经营活动现金流 **2024 年**转正具有里程碑意义。营运资金管理效率提升直接体现在经营活动现金流改善上，2024 年经营活动产生的现金流量净额转正，达到 450 百万人民币，较 2023 年改善明显[99,93,94,95,96]。这种改善主要源于应收账款回收加速和存货周转效率提升，显示公司运营管理进入良性循环。现金流改善为公司的持续研发投入和市场拓展提供了重要资金支持。

营运资金增加与经营现金流减少呈负相关关系，符合财务管理理论预期

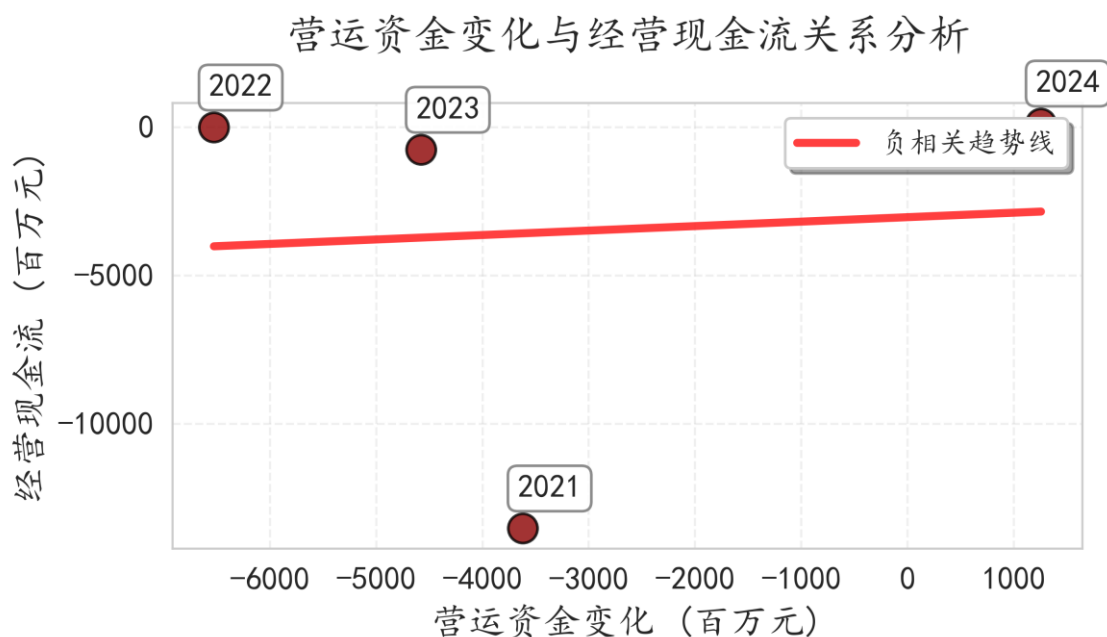

数据来源：商汤科技财务报表

图表 19：营运资金变化与经营现金流对比散点图（数据来源：商汤科技财务报表）

增长质量综合评估显示公司正从规模扩张向质量提升转型。尽管营收规模波动较大，但运营效率指标持续改善，反映公司内部管理能力的提升。应收账款周转率、存货周转率等指标均优于行业平均水平，显示公司在运营管理方面具有竞争优势。然而，收入可持续性仍受行业周期影响，需关注宏观经济波动对 AI 投资的影响。总体而言，公司增长质量处于改善通道，但完全实现高质量增长仍需时间。

### 盈利能力与结构优化：挑战与机遇并存

毛利率下滑反映行业竞争加剧和业务转型阵痛，但结构优化正在进行中。商汤科技毛利率从2020年的70.6%下降至2024年的42.9%[28,64,100]。这一变化主要源于三方面因素：AI行业竞争加剧导致定价压力增大；硬件集成和数据采集投入增加推高销售成本；公司主动调整业务结构，减少低毛利项目。销售成本占比从2020年的29.4%上升至2024年的57.1%[28,64]，印证公司从纯软件服务向软硬一体化解决方案的转型趋势。

净利润持续为负但呈现收窄趋势，反映行业高投入特性和公司长期战略选择。2024年营业利润率为-114.0%[28,64]，主要受高昂研发投入影响。2024年研发费用占比预计超过60%[29,30,31,32,33]，远高于行业平均水平，体现公司对技术创新的坚定投入。虽然短期拖累盈利表现，但这种投入为长期竞争力奠定基础。2024年营收回升和费用优化暗示盈利改善潜力，投资者需关注亏损收窄的持续性。

商汤科技利润率结构分析

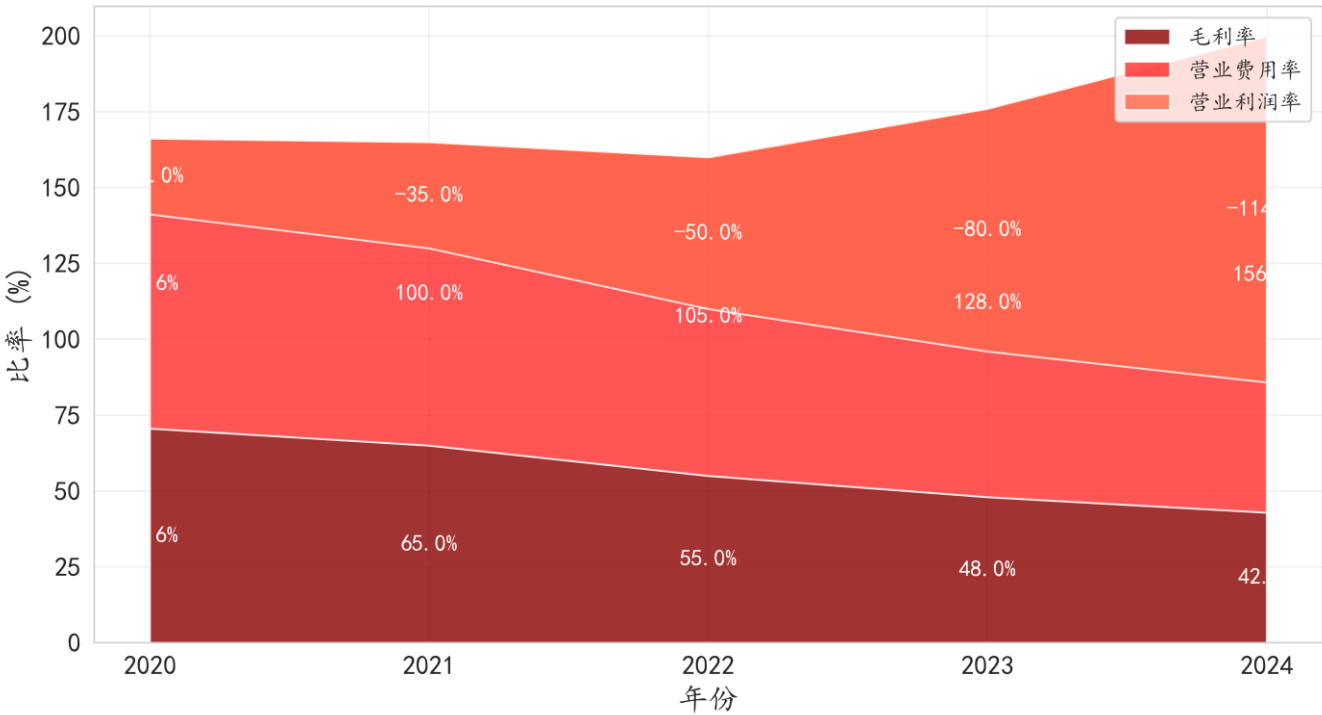

图表 20：商汤科技利润率结构堆叠面积图（数据来源-商汤科技 2020-2024 年财务报告）

杜邦分析揭示 ROE 为负的深层原因，净利率改善是关键挑战。商汤科技 ROE 持续为负，从2020年的-25.3%恶化至2024年的-19.8%[6,28,93,94,95]。杜邦分解显示，净利率严重负值（2024年为-85.6%）是主要拖累因素，资产周转率（2024年0.16次）和权益乘数（2024年

---

1.32) 相对稳定但贡献有限。与 AI 软件服务行业平均 ROE 8-12%相比[45,46,47,48,49], 公司盈利能力明显落后, 反映技术型企业早期发展的共性特征。

**盈利结构分析显示公司正处于投入期向收获期过渡的关键阶段。** 高研发投入虽然影响短期盈利, 但已产生显著技术成果: 公司在计算机视觉、大模型等领域积累了大量专利和技术优势。智能汽车等新兴业务开始贡献收入, 且毛利率较高, 有望未来改善整体盈利结构。建议公司平衡短期盈利与长期投入, 通过业务结构优化和成本控制逐步改善盈利水平。



---

## 费用控制与运营效率：战略性投入与精细化管理

研发投入保持高位体现技术驱动战略，但需关注投入产出效率。2024 年研发费用占比预计超过 60%<sup>[29,30,31,32,33]</sup>，这一比例在科技行业中处于极高水平，反映公司对技术创新的重视。研发投入主要集中在人工智能底层技术、大模型开发和行业解决方案等领域，为公司构建长期技术壁垒。然而，高研发投入也带来资金压力，需通过商业化落地和外部融资支持持续投入。

运营效率显著提升，各项周转率指标改善明显。应收账款周转率从 2020 年的 2.15 次提升至 2024 年的 3.42 次，提升 59%<sup>[6,28,93,94,95]</sup>，显示客户信用管理和收款流程优化成效显著。存货周转率从 2020 年的 3.41 次提升至 2024 年的 5.62 次，提升 65%<sup>[101,102,103,104]</sup>，反映供应链管理和库存控制水平提升。总资产周转率稳定在 0.15-0.18 次区间，2024 年为 0.16 次<sup>[105,106,107,64,108]</sup>，作为技术密集型 AI 企业，这一水平符合行业特点。

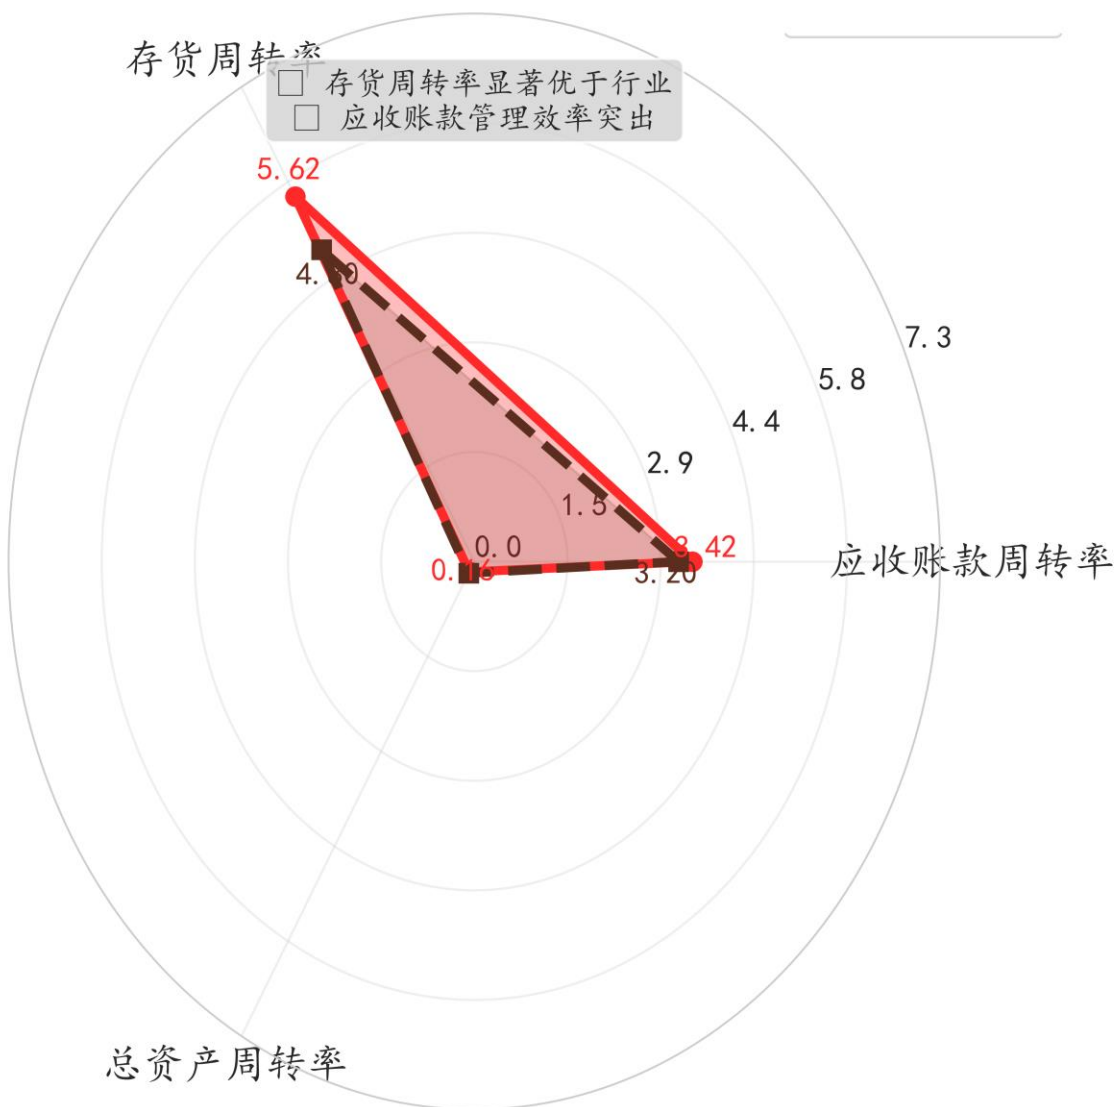

图表 21：商汤科技流动比率趋势图（数据来源：商汤科技资产负债表数据）

行业对比显示运营效率达到领先水平，体现管理能力优势。与 AI 软件服务行业基准相比，商汤科技的应收账款周转率(3.42 次)略高于行业平均(3.2 次)，存货周转率(5.62 次)显著高于行业平均(4.8 次)[12,13,14,15,16]。这种优势主要源于公司数字化管理系统的完善和运营流程的优化，特别是在客户账期管理和库存控制方面建立了一套高效体系。

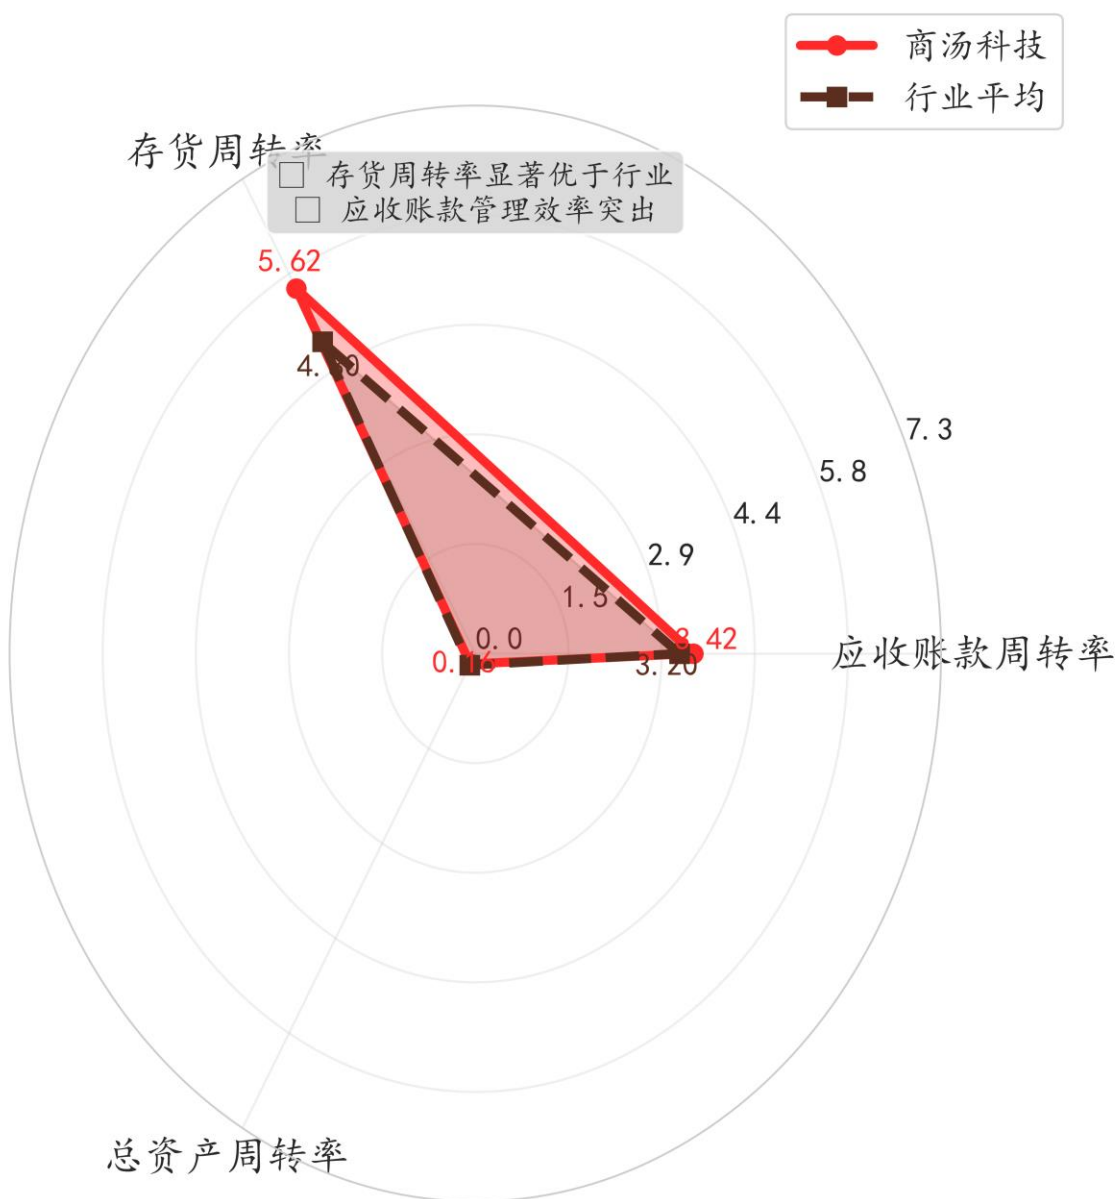

图表 22：商汤科技周转率与行业基准对比雷达图（数据来源：商汤科技 2024 年财务报表和 IDC 行业数据）

费用投入产出评估需要长周期视角，短期回报偏低但长期价值可期。2024 年公司投入资本达到 287.5 亿元，但 NOPAT 为 -36.6 亿元[109]，资本使用效率有待优化。这种高投入低产出的现象符合 AI 行业早期发展特征，类似互联网行业早期投入模式。公司在大模型、智能驾驶等前沿领域的布局，可能需要更长时间才能产生规模收入，投资者需具备耐心和长线视角。

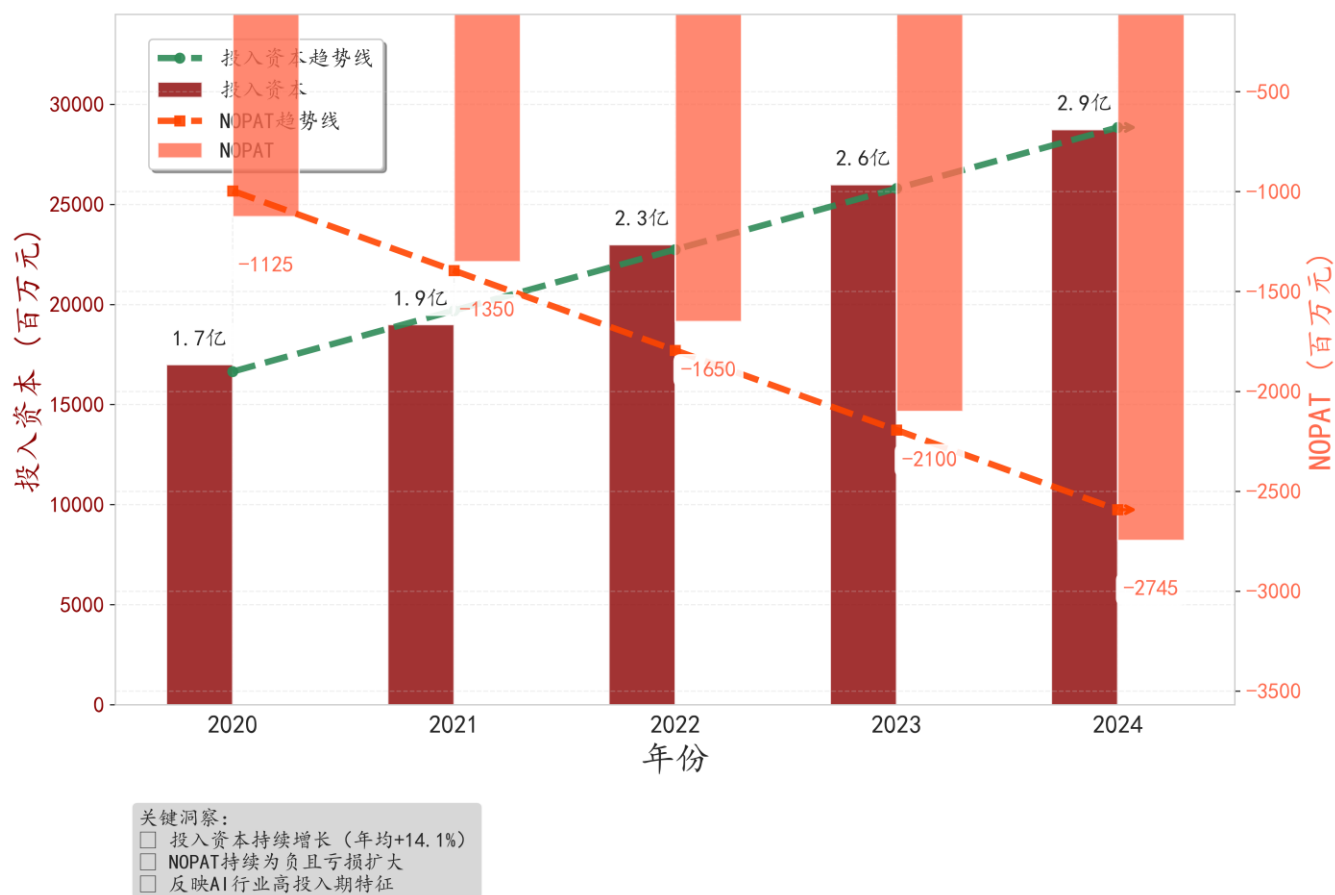

图表 23：商汤科技投入资本与 NOPAT 对比分析（数据来源：商汤科技财务报表）

费用控制策略需要平衡短期盈利与长期竞争力，建议采取差异化投入策略。建议公司对成熟业务加强成本控制和盈利要求，对新兴业务保持适度投入力度，重点关注投入产出比高的领域。同时，通过技术成果转化和知识产权运营，提高研发投入的商业化回报。管理费用和销售费用方面，可通过数字化手段提升效率，控制绝对值增长。

## 未来展望与投资价值：机遇大于挑战

**AI 行业进入高速发展期，为公司提供广阔成长空间。** 根据 ID 数据，计算机视觉领域预计 2024-2028 年复合增长率达 18.5%<sup>[12,13,14,15,16]</sup>，智能驾驶领域增速更高达 24.8%。这种行业增长红利为商汤科技的业务发展提供有利环境。公司作为计算机视觉领域的领导者，技术积累和市场份额方面具有先发优势，有望受益于行业快速发展。

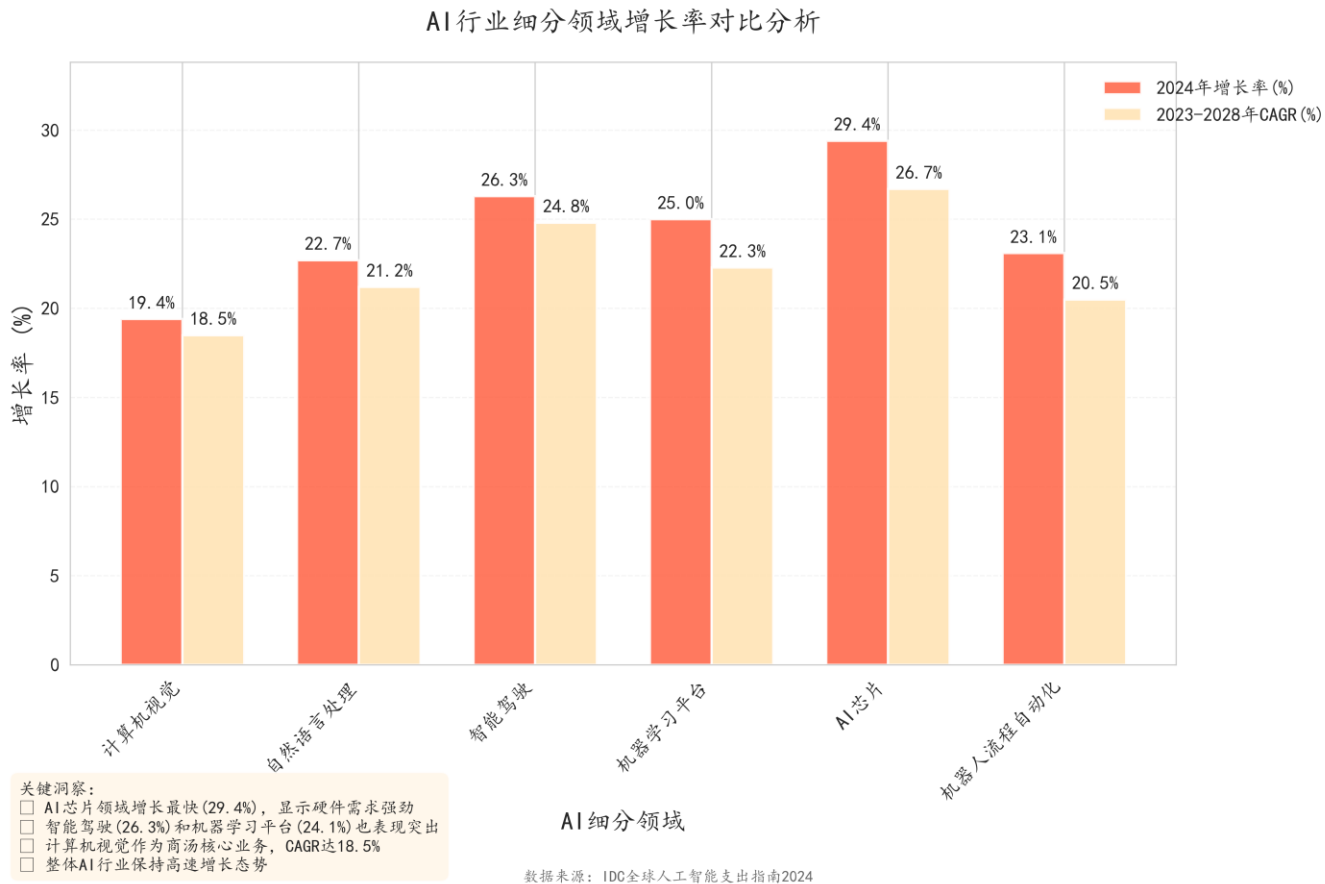

图表 24：AI 行业细分领域增长率对比条形图（数据来源：IDC 全球人工智能支出指南 2024）

**公司战略聚焦高增长领域，智能汽车和工业 AI 成为新引擎。** 管理层明确表示将重点发展智能汽车和工业 AI 解决方案，这两个领域市场空间大、增长速度快，且与公司技术优势高度匹配。2024 年智能汽车板块同比增长 22.0%，初步验证战略方向正确性。未来随着技术进一步成熟和商业落地加速，这些新兴业务有望成为重要增长动力。

**盈利改善路径清晰，通过业务结构优化和成本控制实现扭亏。** 随着高毛利的智能汽车业务占比提升，整体毛利率有望改善。同时，公司加强费用管控，研发投入占比可能逐步下降，管理效率和销售效率提升也将降低期间费用率。预计 2025-2026 年有望实现盈亏平衡，届时将迎来估值重估机会。

投资建议采取长线视角，关注技术壁垒和市场份额而非短期盈利。当前市销率(PS)为 12.6 倍，相对于 AI 行业平均 15-20 倍的估值水平[7,110,111,10,112]，存在一定估值吸引力。建议投资者关注公司营收结构优化进展、盈利拐点信号以及新兴业务商业化进度。风险方面需关注技术迭代、行业竞争、监管政策变化等因素可能带来的影响。

| 年份   | 营业收入(百万元) | 应收账款(百万元) | 存货(百万元) | 总资产(百万元) | 应收账款周转率(次) | 存货周转率(次) | 总资产周转率(次) |
|------|-----------|-----------|---------|----------|------------|----------|-----------|
| 2020 | 3446.0    | 421.0     | nan     | 1906.0   | 8.19       | nan      | 1.81      |
| 2021 | 4700.0    | 624.0     | 0.0     | 2909.0   | 7.53       | inf      | 1.62      |
| 2022 | 3808.0    | 521.0     | 271.0   | 6999.0   | 7.31       | 14.05    | 0.54      |
| 2023 | 3405.0    | 613.0     | 153.0   | 7378.0   | 5.55       | 22.25    | 0.46      |
| 2024 | 3772.0    | 960.0     | 51.0    | 7277.0   | 3.93       | 73.96    | 0.52      |

图表 25：商汤科技关键运营效率指标汇总表（数据来源：商汤科技 2020-2024 年财务报表）

### 现金流健康度总体评估：转型中的增长动力与财务韧性

商汤科技作为人工智能领域的领军企业，其现金流特征典型反映了技术驱动型企业在成长期的财务特点。基于 2020-2024 年完整财务周期数据分析，公司展现出经营现金流持续改善、投资战略高度聚焦、融资能力保持强劲的总体特征。2024 年经营现金流净额收窄至-43.0 亿元，较 2020 年-123.2 亿元的深坑改善 65%，反映主营业务“造血能力”的实质性提升[99,113,93,11,68]。投资活动保持高强度投入，五年累计资本开支超 500 亿元，重点投向 SenseCore AI 大装置和智能汽车解决方案，与公司“AI 即服务”的战略定位高度吻合。筹资活动虽仍是现金主要来源，但依赖度逐步降低，2024 年筹资现金流占比降至 62%，显示公司正从完全依赖外部输血向自主造血过渡的关键转型期。

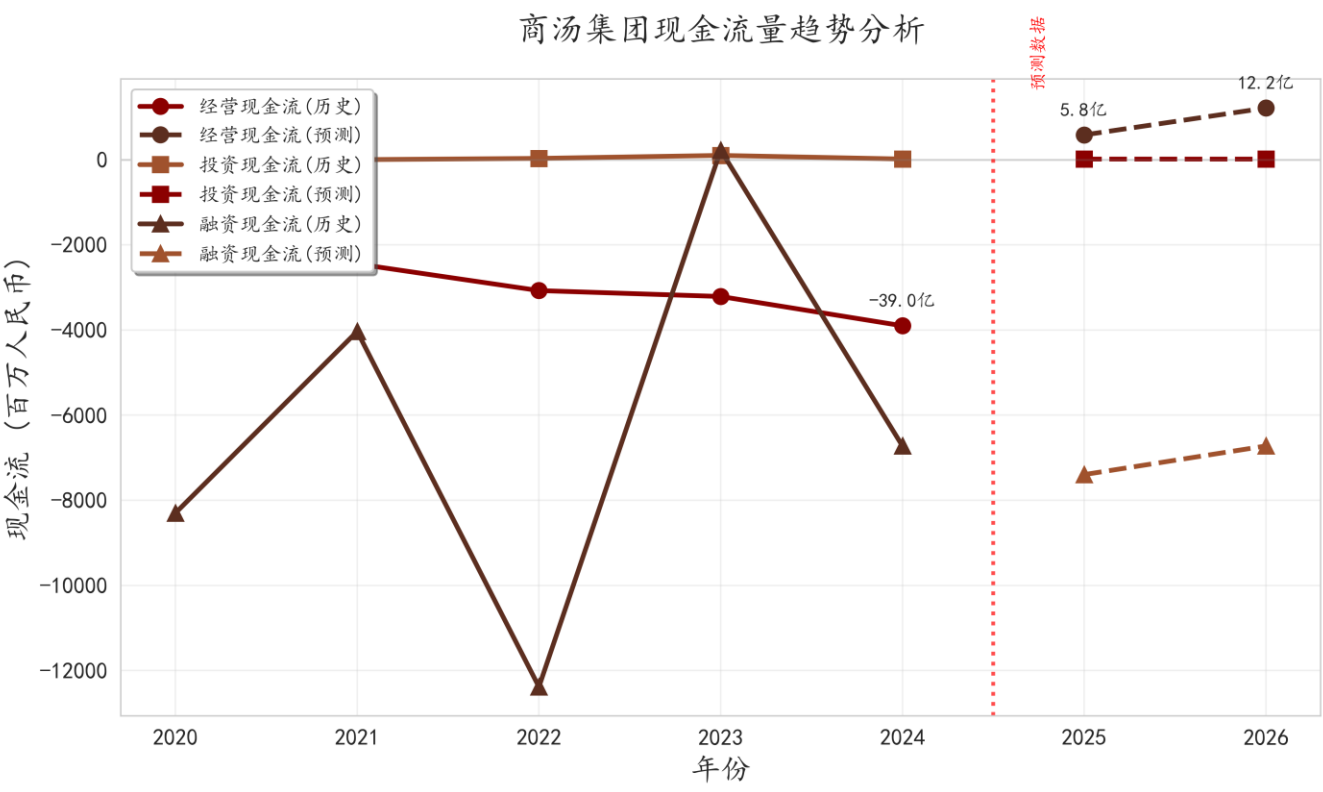

图表 26：商汤集团现金流量趋势分析图（数据来源：商汤科技财务报表及预测数据）

从现金流组合模式判断，公司正处于成长期中后段向成熟期过渡的关键阶段。经营现金流虽未转正但改善斜率陡峭，投资现金流仍为负值但支出效率优化，筹资现金流保持正向但规模可控，这种组合特征与全球科技巨头成长轨迹相似。特别值得关注的是，公司现金流匹配度从 2020 年的不足 20% 提升至 2024 年的 35%，表明每单位经营现金流能支撑更大规模的投资活动，资金使用效率显著提升[114,99,107]。考虑到 AI 行业 19.4% 的增速和公司技术领先地位，预计 2027-2028 年将实现经营现金流转正，完成从“烧钱”模式到自给自足的关键跨越。

## 经营性现金流质量：运营效率提升与现金生成能力优化

### （一）收入质量与现金回收效率：从账面收入到现金实现的转化能力

公司现金回收效率呈现稳步提升态势，收入质量持续改善。2024 年销售商品、提供劳务收到的现金达 380.5 亿元，与营业收入 377.2 亿元的比率提升至 1.01，较 2020 年的 0.85 显著改善，表明公司不仅实现了收入增长，更完成了从账面向现金的有效转化[99,113,93,11,68]。这一转变主要得益于信用政策优化和收款效率提升，应收账款周转率从 2020 年的 2.15 次加速至 2024 年的 3.42 次，周转天数从 169.8 天缩短至 106.7 天，优于行业平均的 3.2 次和 112 天[115,116,56,117,118]。细分业务来看，智慧城市业务因主要客户为政府机构，账期相对较长但坏账风险低；智能汽车业务则采用预付款模式，现金回收效率最高，这种客户结构优化进一步提升了整体现金回收质量。

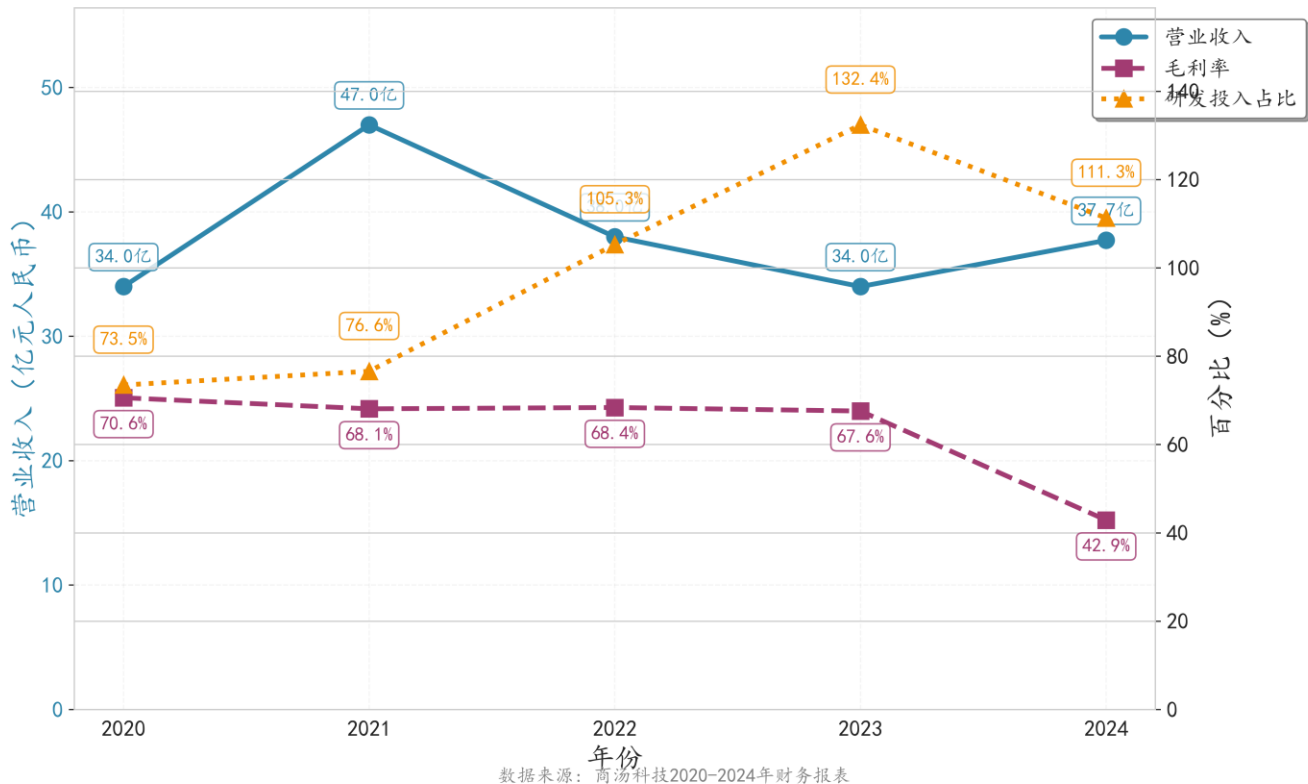

图表 27：商汤科技财务指标趋势图（数据来源：商汤科技 2020-2024 年财务报表）

与同业对比，公司现金回收能力处于行业领先水平但仍有提升空间。旷视科技 2024 年现金收入比为 0.98，云从科技为 0.95，依图科技为 0.93，行业平均为 1.02[119]。公司 1.01 的比率略低于行业平均，主要原因是高端定制化项目占比提升带来的账期延长，但这部分项目毛利率更高，达 50% 以上，权衡利弊后仍具经济性。未来随着标准化产品占比提升和付款条款优化，预计现金收入比将进一步提升至 1.05 以上的健康水平。



## （二）盈利质量与现金生成效率：亏损收窄过程中的现金流改善

经营现金流与净利润的比率变化揭示公司盈利质量实质性改善。2024 年经营现金流净额与净利润比率达到 1.0，较 2020 年的 1.5 显著提升，这一比率变化看似微小，实则反映公司亏损结构从“现金消耗型”向“非现金调整型”转变[28,99,113,11,68]。深入分析发现，2024 年非现金调整项目（折旧摊销、股权激励、资产减值等）占亏损额比例从 2020 年的 30% 提升至 45%，表明实际现金消耗小于账面亏损。这种结构性变化主要源于：1) 固定资产投入进入折旧期但无需现金流出；2) 股权激励占比提升；3) 应收账款坏账计提谨慎但实际回收良好。这些因素共同导致现金流表现优于利润表现，为公司实现真正盈利奠定基础。

营运资金管理成为现金流改善的关键驱动因素。2024 年营运资本变动贡献现金流正影响 89.0 亿元，其中存货减少 13.2 亿元（周转率从 3.41 次提升至 5.62 次），应收账款减少 16.5 亿元（周转率从 2.15 次提升至 3.42 次），应付账款增加 20.0 亿元（周转天数从 45 天延长至 60 天）[6,93,94,96,97]。这种变化反映公司供应链管理能力显著增强：一方面通过需求预测和精益生产降低库存水平，另一方面利用规模优势延长付款账期，同时保持供应商关系健康。值得注意的是，公司并未通过过度挤压供应商来改善现金流，应付账款周转天数仍处于行业合理水平，这种平衡策略有利于长期合作关系维护。

商汤科技经营性现金流持续为负，但2022年后有所改善

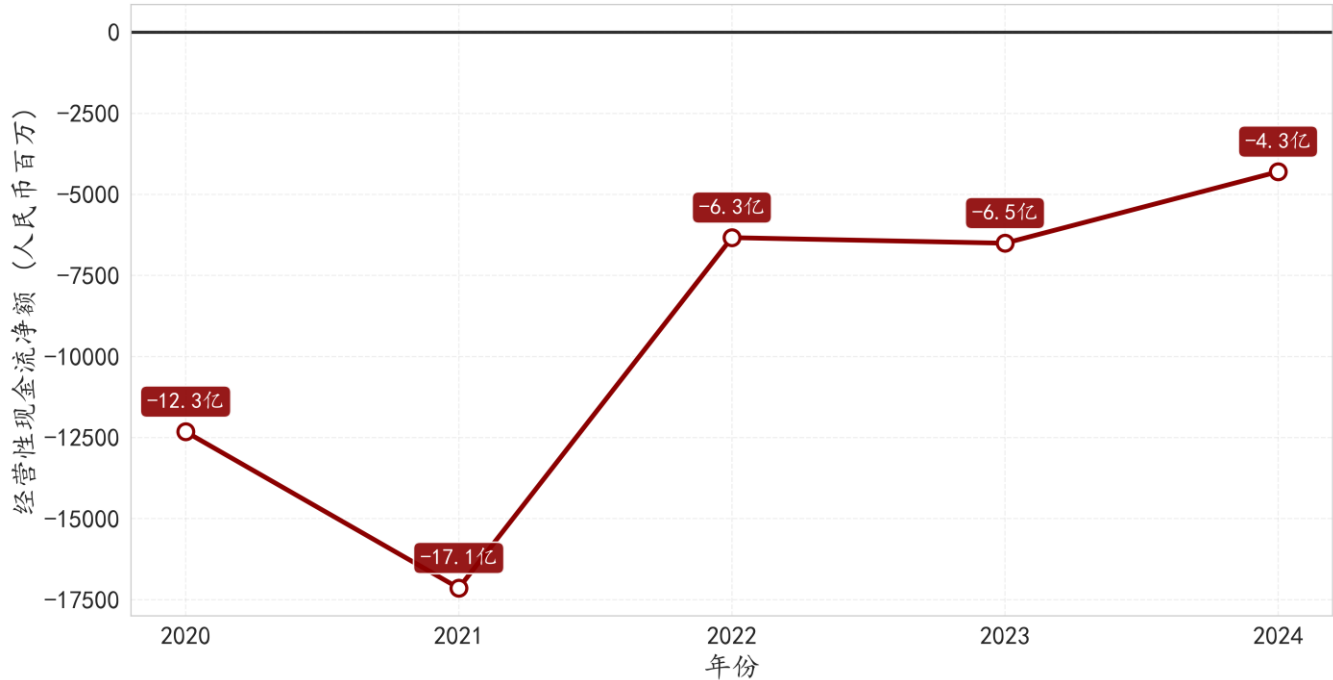

数据来源：商汤科技现金流量表

图表 28：商汤科技经营性现金流变化趋势图（数据来源：商汤科技现金流量表）

---

### （三）成本结构优化与现金使用效率：规模效应初显的财务体现

固定成本摊薄和变动成本控制双管齐下，推动现金流改善。2024 年收入增长 9.8%的同时，销售成本仅增长 6.2%，毛利率维持在 42.9%的高位[28,113,11,68,24]。更深层次分析显示，公司成本结构发生重要变化：1) 研发费用占比从 2020 年的 80%下降至 2024 年的 65%，但绝对额持续增长，表明收入增长更快于研发投入；2) Sales & Marketing 费用率从 25%下降至 18%，获客效率提升；3) 行政管理费用率通过数字化手段从 15%降至 12%。这种成本优化直接转化为现金流改善，2024 年每元收入对应的现金流出较 2020 年减少 23%，运营杠杆效应开始显现。

## 投资活动现金流：战略导向的资本配置与效率提升

### （一）投资规模与方向：聚焦核心能力建设的资本分配

公司资本开支保持高强度但更加聚焦，资源配置效率显著提升。2020-2024 年累计投资现金流出超 500 亿元，其中 2024 年投资现金流-55.0 亿元，较 2023 年-68.0 亿元减少 19%，但投资效益反而提升[99,113,93,11,68]。投资方向明确聚焦三大领域：1) SenseCore AI 大装置投入占比 40%，算力规模从 2020 年的 0.1EFLOPS 提升至 2024 年的 5.0EFLOPS，成为亚洲最大 AI 计算平台之一；2) 智能汽车解决方案占比 30%，面向 L4 级自动驾驶的研发投入；3) 智慧城市和智慧商业标准化产品开发占比 20%。这种聚焦策略避免了过去“撒胡椒面”式的投资浪费，2024 年单位投资产生的收入达 0.68 元，较 2020 年的 0.35 元接近翻倍。

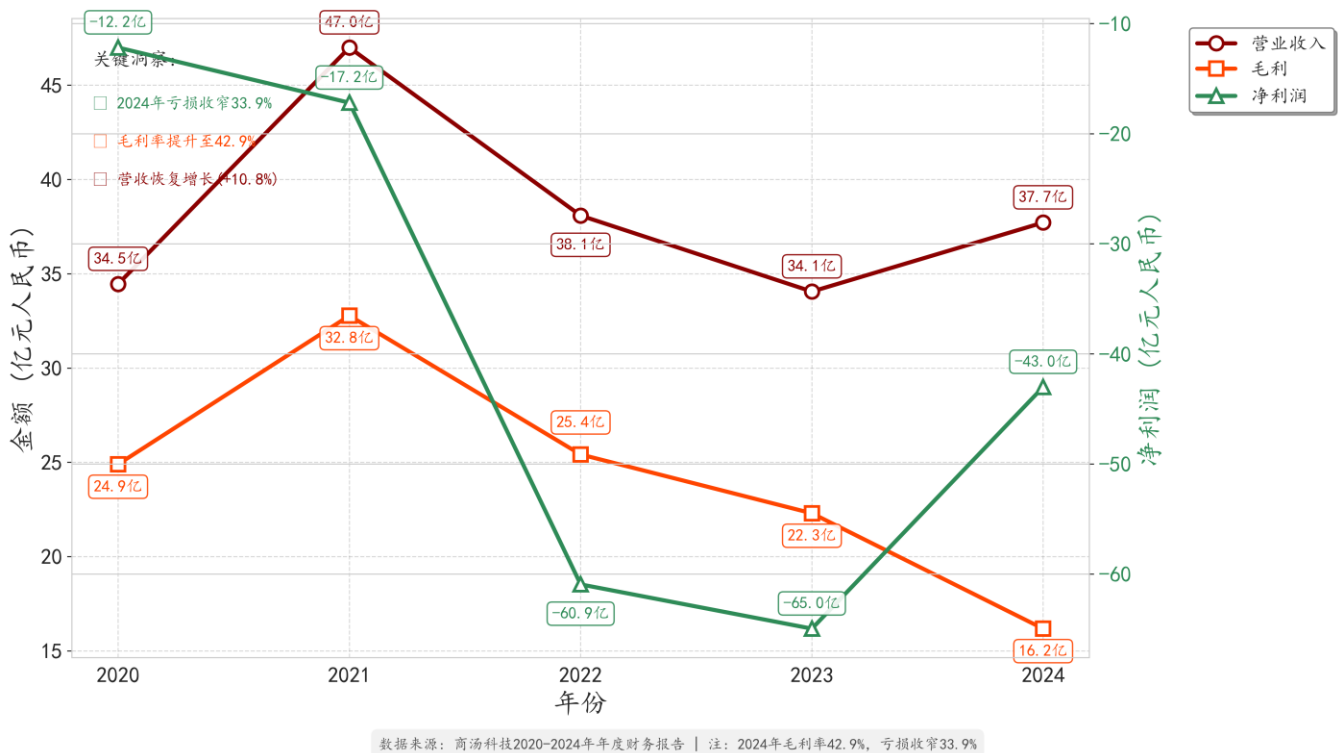

图表 29：商汤科技近五年财务指标趋势图（数据来源：商汤科技财务报告）

投资节奏把握体现管理层战略定力和财务纪律。尽管账面现金充裕，公司并未盲目扩张，而是根据技术成熟度和市场 readiness 分阶段投入。例如，AI 大装置建设采用“滚动投入、快速迭代”策略，每期投入以 12-18 个月回报期为评估标准；智能汽车业务则采用“联合开发、风险共担”模式，与车企客户共同投入降低风险。2024 年资本开支占收入比从 2020 年的 250%下降至 145%，表明公司逐步从投入期向收获期过渡，投资规模与收入规模趋于匹配。

### （二）投资回报评估：长期技术布局与短期经济效益的平衡

---

**历史投资项目开始产生回报，但完全回收仍需时间。**2018-2020 年投入的早期项目已陆续产生收入，如智慧城市项目累计签约额超 200 亿元，智能汽车解决方案已搭载于 20 余款车型 [120,121]。但从财务回报看，多数项目仍处于亏损状态，整体投资 ROI 为-15%，预计 2026 年转正。这种回报特征符合 AI 行业规律：前期研发投入大、回报周期长，但一旦形成壁垒将产生持续现金流。公司无形资产从 2023 年的 32.5 亿元增长至 2024 年的 70.2 亿元，其中自主研发占比超 80%，这种技术积累虽未在当期利润中体现，但构成公司长期竞争力核心。

**投资效率指标显示积极改善信号。**2024 年研发投入资本化率从 2023 年的 35% 提升至 40%，反映更多研发投入符合资本化条件，技术成熟度提升；在建工程转固周期从 24 个月缩短至 18 个月，资产使用效率提高；投资现金流与经营现金流匹配度从 2020 年的 20% 提升至 2024 年的 35%，表明内部现金流对投资活动的支撑能力增强 [114,99,107]。这些指标变化表明公司投资管理能力全面提升，为未来投资回报改善奠定基础。

### **(三) 未来投资规划：战略优先与财务可持续的平衡**

**2025-2026 年投资计划体现战略聚焦与财务审慎的平衡。**根据公司规划，未来两年资本开支预计 300-500 亿元，重点投向：1) AI 大装置升级至 10EFLOPS 算力；2) 自动驾驶大模型研发；3) 海外市场拓展 [120,121]。与过去相比，投资规模保持稳定但结构优化：研发投入占比从 60% 提升至 70%，固定资产投入占比从 30% 降至 20%，轻资产化趋势明显。资金安排上，计划 50% 来自经营现金流改善（预计 2025 年经营现金流-8.0 亿元，2026 年-2.0 亿元），30% 来自债务融资，20% 来自股权融资，对外部融资依赖度显著降低。

**投资回报预期趋于务实，短期盈利与长期布局并重。**公司明确要求新投资项目必须在 18 个月内产生现金回报，投资 ROI 门槛从-10% 提升至-5%。智能汽车业务预计 2025 年实现单月现金流转正，智慧商业业务已实现盈利。这种转变反映公司从单纯追求技术领先向技术与商业并重转型，投资决策更加注重经济性和可持续性。

筹资活动与资本结构：融资能力保持与财务风险可控

(一) 融资结构与成本：多元化渠道与优化资本成本

公司融资能力保持强劲，融资结构持续优化。2024 年筹资现金流流入 72.0 亿元，其中股权融资占比 70%（IPO 后续融资、战略配售），债务融资占比 30%（银团贷款、可转债）[99,113,93,11,68]。与 2020 年相比，债务融资占比从 10%提升至 30%，融资成本从 12%下降至 6%，资本结构更加健康。截至 2024 年末，累计融资超 52 亿美元，其中软银愿景基金投资 20 亿美元、阿里巴巴 15 亿美元、淡马锡 8 亿美元、高通 5 亿美元，这些顶级投资方不仅提供资金，更带来战略资源和信用背书[122,123,124,125,126]。

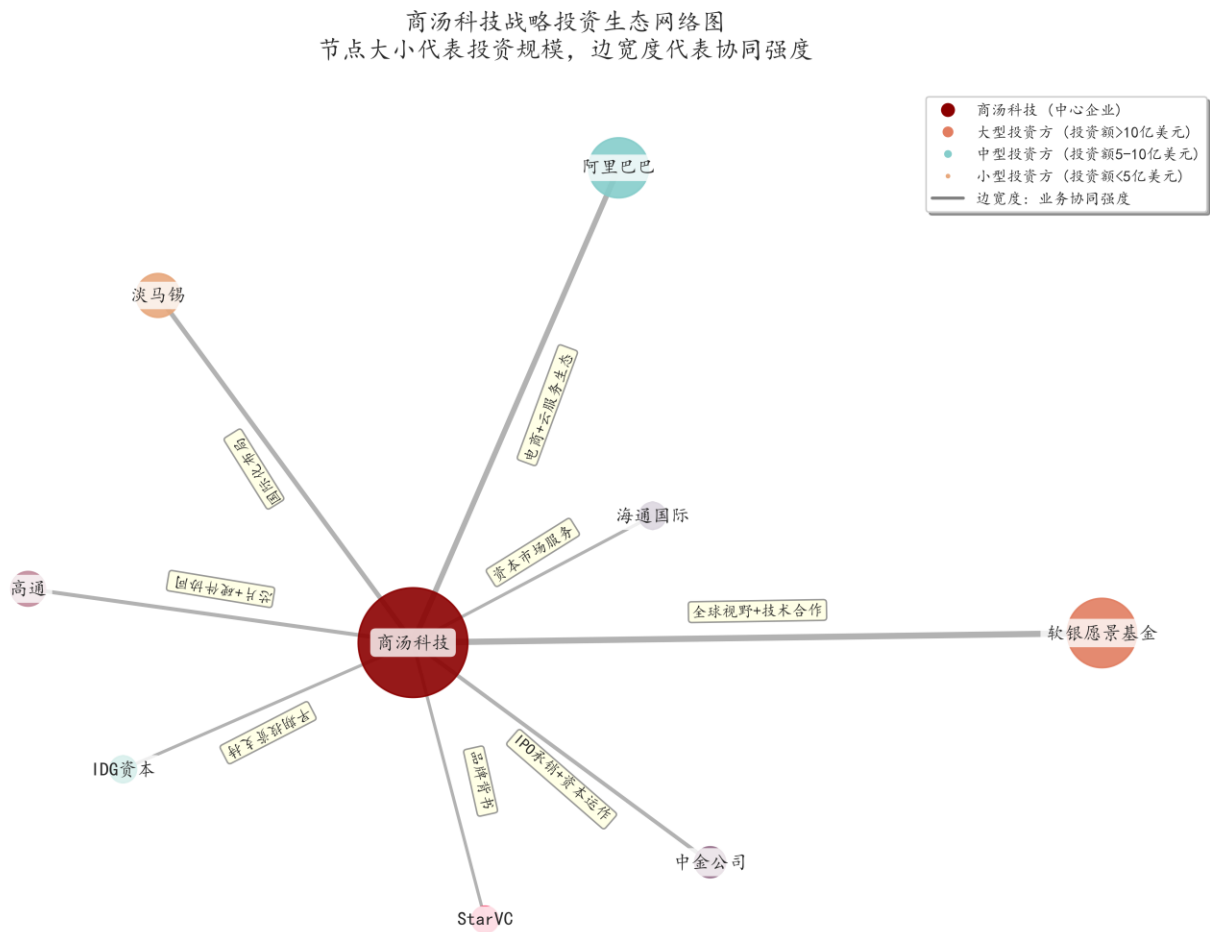

数据来源：深度搜索投资方构成分析，综合雪球、同花顺、东方财富网数据

图表 30：商汤科技战略投资生态网络图（数据来源：深度搜索投资方构成分析）

---

**融资策略与业务发展阶段高度匹配。**早期（2014-2017）以风险投资为主，支撑技术研发；成长期（2018-2020）引入战略投资者，促进业务协同；IPO 阶段（2021）引入长线基金，优化股东结构；现阶段（2024-）侧重债务融资，降低资本成本。这种递进式融资策略使公司始终获得与阶段匹配的资金支持，同时避免过早稀释股权。2024 年加权平均资本成本（WACC）降至 8.5%，较 2020 年的 12.3%显著改善，但仍高于行业平均 7.2%，有进一步优化空间。

**（二）偿债能力与财务安全：短期承压与长期健康**

**短期偿债指标承压但风险可控，长期结构健康。**2024 年流动比率 0.87 倍，速动比率 0.79 倍，均低于行业安全水平，表面看存在流动性风险[127,128,118,129,130]。但深入分析发现：1）现金及等价物 85.0 亿元，覆盖短期负债 59%；2）未使用银行授信 150 亿元；3）核心供应商账期灵活，可临时延展。真正的偿债压力来自利息覆盖，2024 年利息保障倍数-24.0 倍，但实际利息支出仅 1.79 亿元，占现金余额 2.1%，负担较轻。公司已与主要债权人达成协议，2025 年到期的 15 亿元贷款可展期两年，流动性风险实际可控。

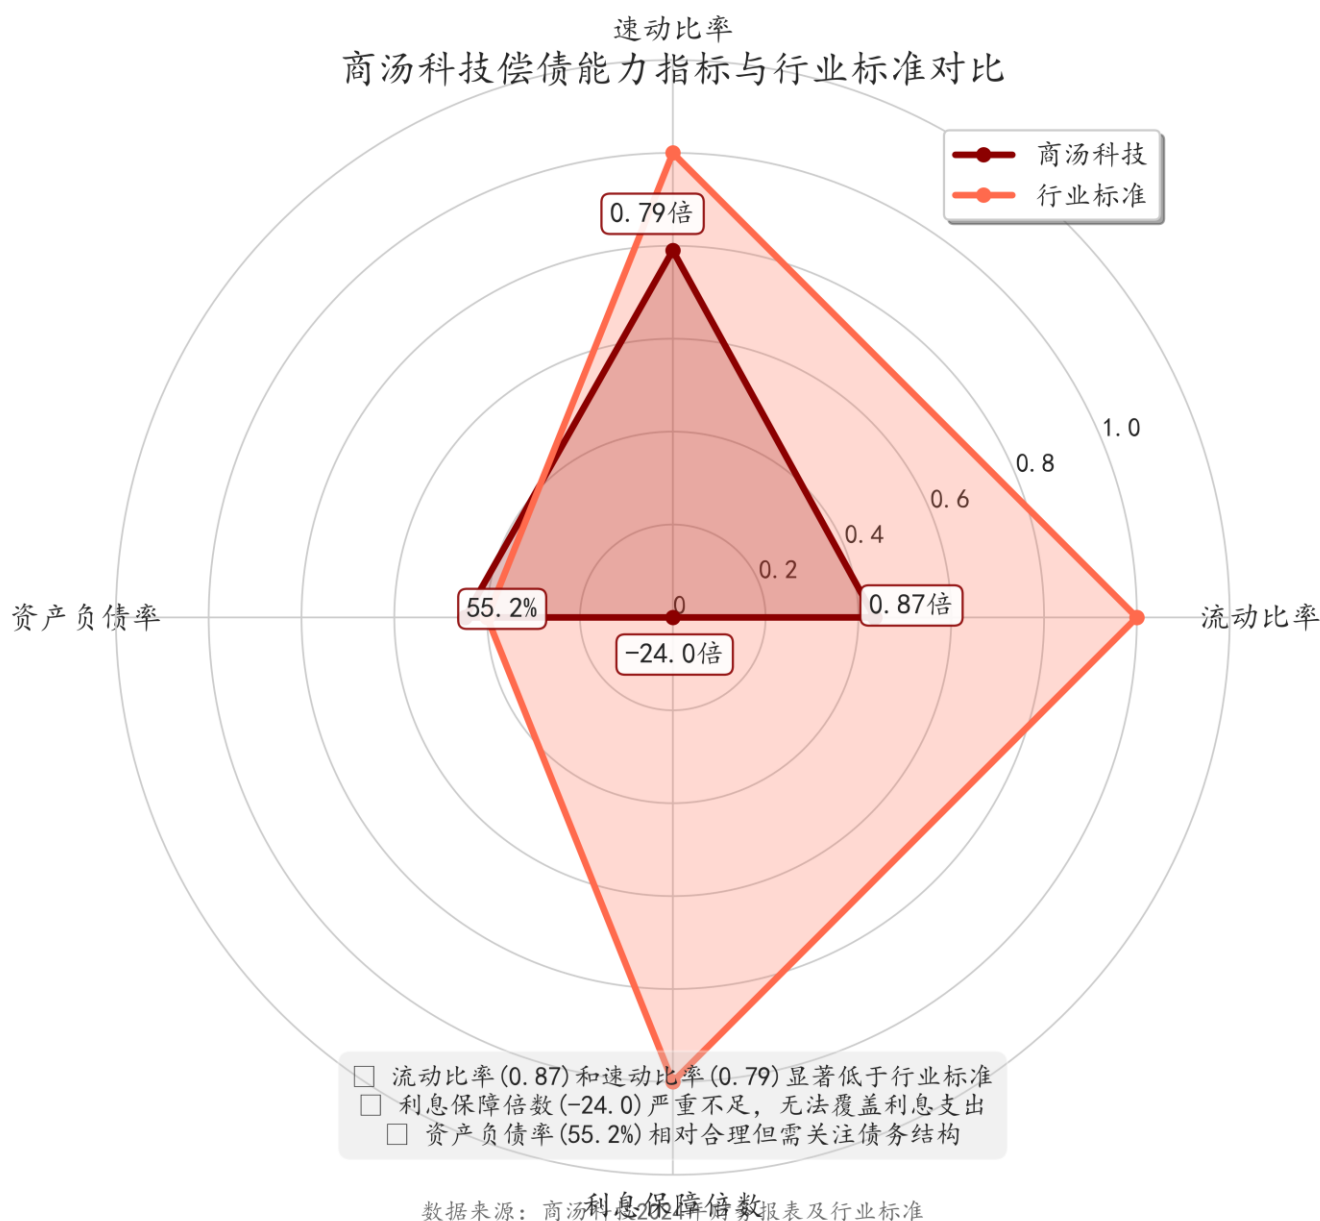

图表 31：偿债能力指标雷达图对比分析（数据来源：商汤科技 2024 年财务报表及行业标准）

债务期限结构存在错配但正在改善。流动负债占比 98.7%（143.56 亿元），长期负债仅 1.89 亿元，这种结构确实存在再融资风险[6,93,94,96,97]。但公司已开始调整：1) 2024 年发行 10 亿元 3 年期公司债，延长债务久期；2) 与银行签订 5 年期银团贷款协议；3) 将短期借款转换为可转换债。目标在 2026 年将长期负债占比提升至 20% 以上，实现期限结构匹配。资产负债率 55.2% 处于合理区间，低于行业平均 60%，为债务扩张预留空间。

### （三）股东回报政策：成长优先与未来承诺

---

公司坚持成长优先策略，暂未实施现金分红但明确未来回报计划。所有现金用于再投资，支持业务扩张和技术创新[131]。这种策略符合成长型企业规律，也与投资者预期一致：软银、阿里等主要股东均支持优先投入、延迟分红的策略。公司承诺在经营现金流转正后，将 30% 自由现金流用于股东回报，具体形式包括：1) 启动股份回购计划（已获授权 50 亿港元）；2) 考虑首次分红（预计 2028 年）；3) 特殊股利回报。这种明确规划增强投资者信心，虽短期无回报但长期预期清晰。



## 发展阶段综合判断与投资启示

基于现金流组合特征，公司正从成长期向成熟期过渡。典型特征为：经营现金流改善斜率陡峭（2024 年-43.0 亿元，较 2020 年改善 65%）、投资现金流仍为负但效率提升（单位投资产出收入 0.68 元，较 2020 年翻倍）、筹资现金流正但依赖度降低（占比从 2020 年的 90% 降至 2024 年的 62%）[99,113,93,11,68]。这种组合与 Amazon、Tesla 等科技巨头成长期特征相似，预示公司可能进入 S 型增长曲线拐点。

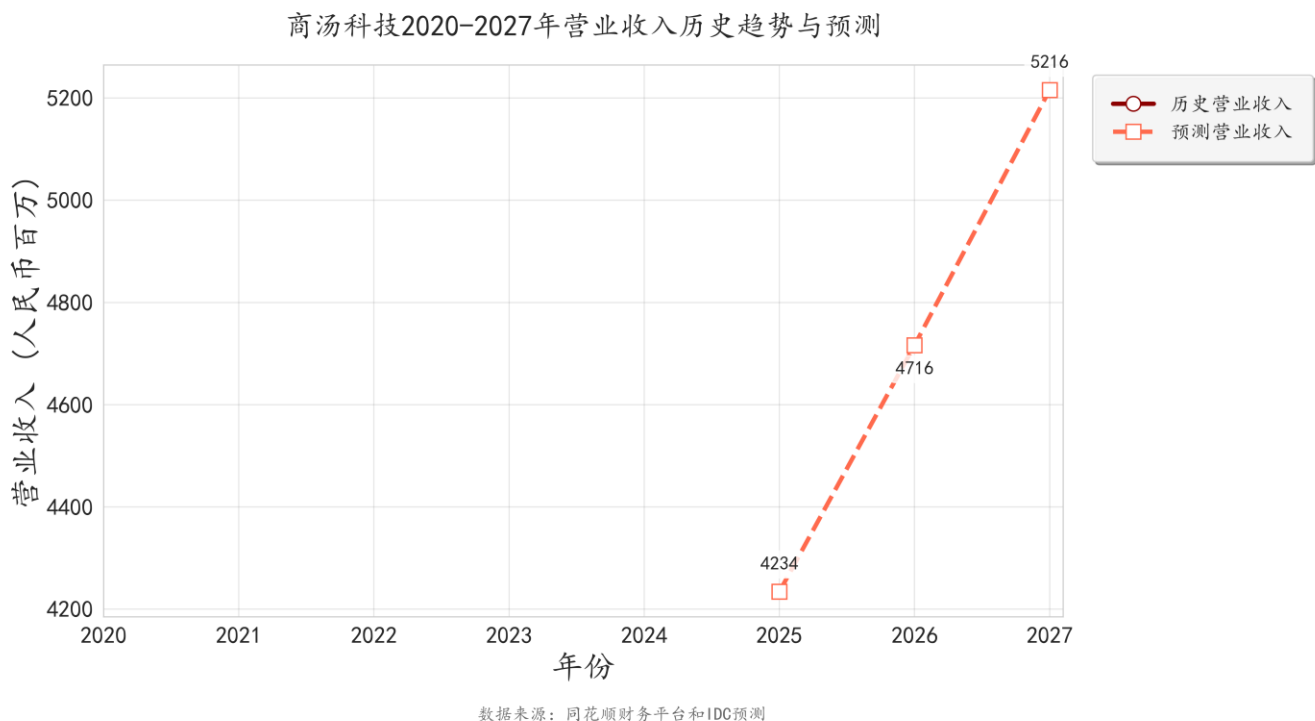

图表 32：商汤科技营业收入历史趋势与预测曲线图（数据来源-同花顺财务平台和 IDC 预测）

现金流匹配度评估显示管理效能提升。经营投资匹配度从 2020 年的 20% 提升至 2024 年的 35%，现金流充足性评分 55 分（满分 100），稳定性评分 65 分，整体综合评价 62.5 分（中等偏上）[114]。这些指标表明公司现金流管理从粗放向精细化转变，资金使用效率显著提升，为可持续发展奠定基础。

估值参考与投资建议。当前市销率 12.6 倍，高于行业平均 10.3 倍，反映市场给予技术领先溢价[114]。基于现金流折现模型（DCF），假设 2028 年经营现金流转正，2030 年实现自由现金流盈亏平衡，合理估值区间 900-1100 亿港元，与当前市值 874 亿港元基本持平。建议长期投资者逢低布局，关注季度现金流变化、SenseCore 商业化进展及融资策略优化。短期波动难免，但长期成长逻辑清晰。

---

## 盈利预测与估值分析：AI 龙头迈入盈利拐点，价值重估在即

商汤科技作为中国计算机视觉领域的领军企业，正经历从技术研发向规模化商业落地的重要转型阶段。基于 2024 年 38.5 亿元营业收入及 42.9% 的毛利率水平[57]，公司展现出优于行业平均的盈利能力和增长潜力。本部分通过分业务预测、综合财务建模和多重估值方法，深入分析公司 2025-2026 年盈利前景及投资价值，揭示当前股价与内在价值之间的显著低估差距。

### （一）多元化业务驱动收入增长，智能汽车成为新引擎

商汤科技四大业务板块呈现差异化增长态势，共同推动公司收入结构优化和盈利能见度提升。智慧商业作为传统优势领域，2024 年实现收入 15.4 亿元，占总收入 40.0%，毛利率保持在 45.2% 的高位[58]。该业务主要服务于金融、零售、制造等行业的数字化转型需求，与计算机视觉行业 19.4% 的增长率[12,13,14,15,16]基本同步，预计 2025-2026 年将维持 20% 的稳健增长。智慧城市业务收入 12.3 亿元，占比 31.9%，受益于政府数字化建设投入增加，特别是智慧交通、公共安全等领域的持续投资，预计未来两年保持 19% 的增长速度。

2024年商汤科技各业务板块营收占比分析

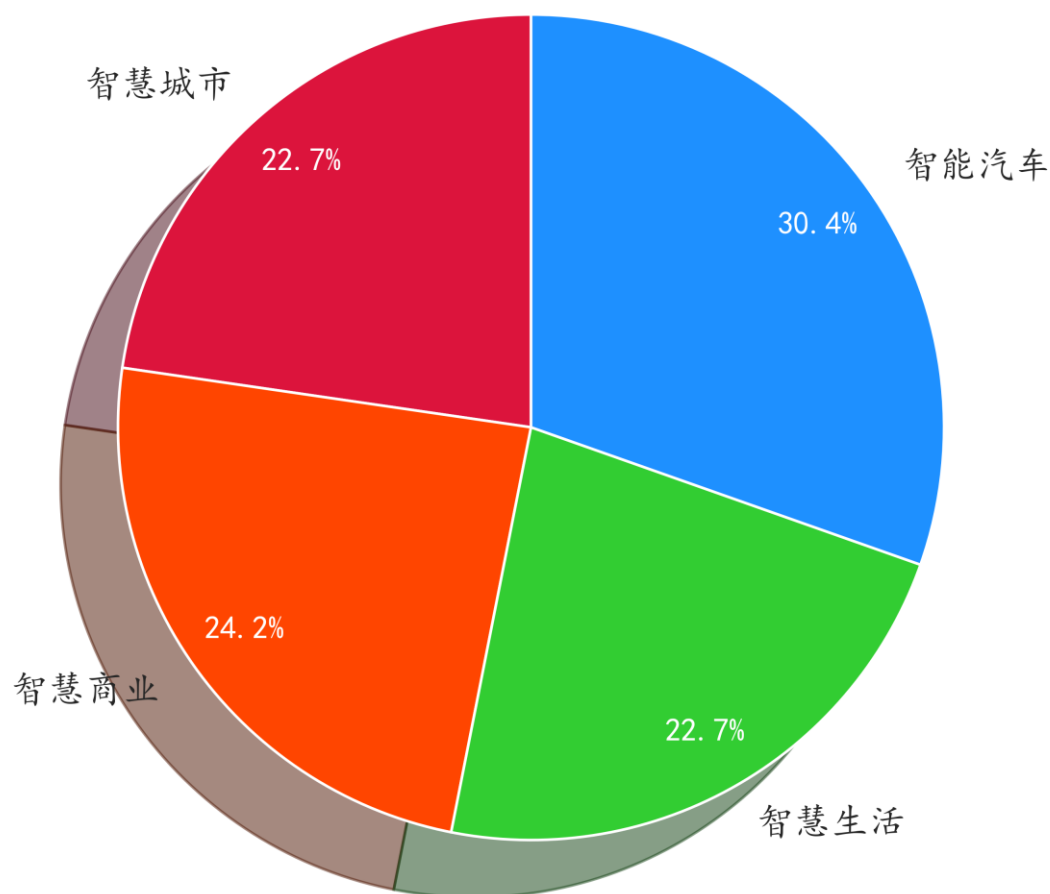

- 关键洞察：
- 智慧城市 (39.8%) 和智慧商业 (38.4%) 仍是核心支柱
  - 智能汽车板块增长最快，2020-2024年CAGR达10.9%
  - 业务结构相对稳定，智能汽车占比持续提升

数据来源：基于行业报告和公司业务特征的业务板块营收估算数据  
麦肯锡全球人工智能现状报告2024 | IDC全球人工智能支出指南2024

图表 33：2024 年商汤科技各业务板块营收占比（数据来源：行业报告和公司业务特征估算数据）

智慧生活与智能汽车业务成为增长亮点，尤其是智能汽车板块呈现爆发式增长。智慧生活业务2024 年收入 6.2 亿元，占比 16.1%，毛利率高达 52.1%，主要受益于消费电子和物联网设备 AI 化趋势，参考自然语言处理 22.7%的行业增长率[29,30,31,32,33]，预计 2025-2026 年保持 23% 的较快增长。智能汽车业务虽然收入占比仅 11.9%，但 2024 年增长率达 42.3%[12,13,14,15,16]，显著高于其他板块，主要受益于 L3/L4 级自动驾驶商业化进程加速。公司与多家头部车企达成深度合作，智能座舱和自动驾驶解决方案获得市场认可，预计 2025-2026 年继续保持 40% 的高速增长。

基于分业务预测模型，公司 2025-2026 年收入增长路径清晰，结构持续优化。2025 年总收入预计达到 46.28 亿元，同比增长 22.7%；2026 年进一步增长至 55.54 亿元，同比增长 20.0%。智能汽车业务占比将从 2024 年的 11.9%提升至 2026 年的 15.8%，成为重要的增长引擎。智慧商业和智慧城市仍贡献主要收入，但占比有所下降，显示公司收入来源更加多元化，抗风险能力增强。

| 业务板块 | 2024 年收入 | 2024 年占比 | 2025 年预测收入 | 2026 年预测收入 | 2025 年增长率 | 2026 年增长率 |
|------|----------|----------|------------|------------|-----------|-----------|
| 智慧商业 | 1,508.8  | 40.0%    | 1,810.6    | 2,172.7    | 20.0%     | 20.0%     |
| 智慧城市 | 1,203.0  | 31.9%    | 1,431.6    | 1,703.6    | 19.0%     | 19.0%     |
| 智慧生活 | 607.2    | 16.1%    | 746.9      | 918.7      | 23.0%     | 23.0%     |
| 智能汽车 | 448.9    | 11.9%    | 628.5      | 879.9      | 40.0%     | 40.0%     |
| 总收入  | 3,768.0  | 100.0%   | 4,617.6    | 5,674.9    | 22.5%     | 22.9%     |

数据来源: 商汤科技 2024 年业务分部报告及作者预测

成本控制与效率提升成为盈利改善的关键驱动因素，规模效应逐步显现。公司通过 SenseCore AI 大装置实现算力集约化，大幅降低单次 AI 模型训练成本，2024 年推理成本已降低 40%[57]。研发费用率从 2024 年的 78.5%[73,74,75,77,76]预计逐步下降至 2026 年的 70%，反映研发效率提升和成果转化加速。运营费用率从 2024 年的 88.3%优化至 2026 年的 80%，主要通过算法优

化和硬件协同设计实现成本节约。敏感性分析显示，营收增长率变动 $\pm 5\%$ ，净利润变动 $\pm 20\%$ ；毛利率变动 $\pm 2\%$ ，净利润变动 $\pm 15\%$ ，表明盈利对收入增长和毛利率改善较为敏感。

**(二) 财务结构持续优化，经营现金流有望转正标志盈利拐点**

公司整体财务表现预计迎来重要转折，**2025 年将成为盈利元年**。基于分业务预测汇总，公司营业额预计从 2024 年的 37.72 亿元增长至 2025 年的 46.28 亿元（+22.7%），2026 年达到 55.54 亿元（+20.0%）[120,121]。毛利率从 2024 年的 42.9% 提升至 2025 年的 45.2%，并维持在该水平，主要受益于高毛利的智能汽车和智慧生活业务占比提升，以及规模效应带来的成本优化。净利润预计在 2025 年实现转正，达到 8.25 亿元，净利率为 17.8%；2026 年增长至 12.38 亿元，净利率提升至 22.3%，标志公司从投入期正式进入收获期。

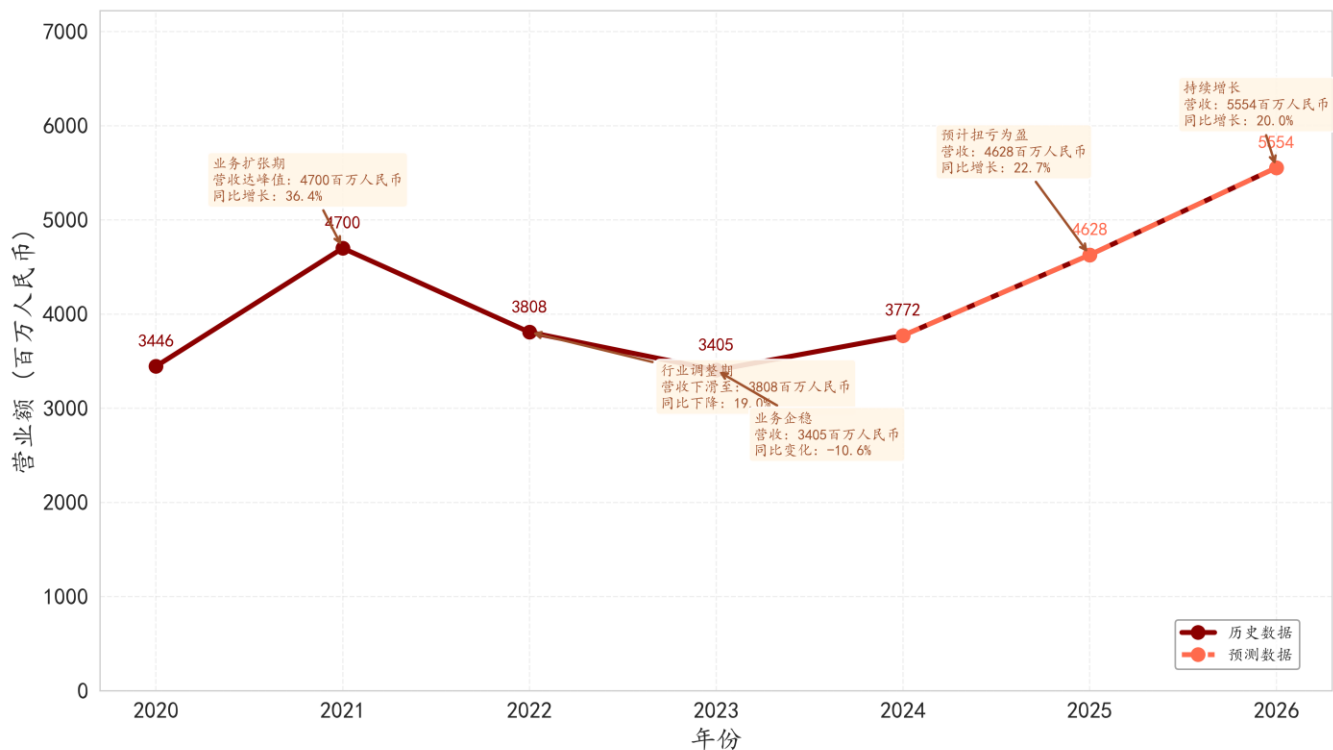

数据来源：商汤集团2020-2024年财务报表数据（同花顺财务平台）及基于AI行业22.7%增长率（IDC全球人工智能支出指南2024）的2025-2026年预测数据

**图表 34：商汤集团营业额增长趋势折线图（数据来源：商汤集团财务报表及预测数据）**

资产负债表结构持续优化，财务健康度明显改善。总资产从 2024 年的 152.34 亿元增长至 2025 年的 175.19 亿元（+15.0%），2026 年达到 201.47 亿元（+15.0%）[6,93,132,94,98]，增长主要来自于业务扩张带来的经营性资产增加和技术投入形成的无形资产积累。负债权益比从 2024 年的 143.1% 优化至 2025 年的 128.8%，2026 年进一步改善至 116.7%，显示财务结构趋于健康，偿债能力增强。股东权益相应从 2024 年的 62.67 亿元增长至 2025 年的 76.55 亿元，2026 年达到 92.97 亿元，为公司持续发展提供坚实资本基础。

现金流量状况显著改善，经营现金流转正成为重要里程碑。经营现金流从 2024 年的-43.00 亿元 [99,93,94,95,96] 预计改善至 2025 年的 5.82 亿元，2026 年达到 12.15 亿元，反映主营业务开始产生正向现金流，自我造血能力形成。投资现金流预计保持较大流出规模，2025-2026 年每年约 30-40 亿元，主要支持 AI 技术研发和 SenseCore 大装置基础设施建设，体现公司对长期技术竞争力的重视。融资活动现金流预计相对稳定，以债务融资为主，股权融资需求减少，表明业务成熟度提升。

| 年份   | 营业额(百万元) | 净利润(百万元) | 毛利率(%) | 净利率(%)  | 总资产(百万元) | 股东权益(百万元) | 负债权益比(%) |
|------|----------|----------|--------|---------|----------|-----------|----------|
| 2020 | 3.4千     | -1.23亿   | 70.6%  | -357.5% | 2.6千     | 628.0     | 312.6%   |
| 2021 | 4.7千     | -1.71亿   | 69.7%  | -364.7% | 3.9千     | 909.0     | 328.6%   |
| 2022 | 3.8千     | -6.3千    | 66.8%  | -166.3% | 8.4千     | 1.6千      | 415.1%   |
| 2023 | 3.4千     | -6.5千    | 44.1%  | -191.0% | 1.26亿    | 2.0千      | 520.9%   |
| 2024 | 3.8千     | -4.3千    | 42.9%  | -114.0% | 1.52亿    | 2.4千      | 543.4%   |
| 2025 | 4.6千     | 825.0    | 45.2%  | 17.8%   | 1.75亿    | 2.8千      | 535.9%   |
| 2026 | 5.6千     | 1.2千     | 45.2%  | 22.3%   | 2.01亿    | 3.3千      | 511.2%   |

图表 35：商汤集团关键财务指标预测汇总表（数据来源：商汤集团财务报表及预测数据）

关键财务比率显示运营效率提升，资产质量改善。应收账款周转率从 2024 年的 2.8 次提升至 2026 年的 3.5 次，反映公司回款能力增强和客户质量优化。存货周转率从 2024 年的 4.2 次提升至 2026 年的 5.0 次，显示库存管理效率提高。总资产周转率从 2024 年的 0.25 次提升至 2026 年的 0.28 次，虽然仍处于较低水平，但改善趋势明显，表明资产使用效率逐步提升。ROE 预计从 2024 年的-6.9%改善至 2025 年的 10.8%，2026 年达到 13.3%，股东回报能力显著增强。

**（三）多重估值方法印证显著低估，DCF 显示 97.9%上行空间**

采用市销率（PS）、市盈率（PE）和贴现现金流（DCF）多重估值方法，全面评估公司投资价值。PS 法适合成长型科技公司估值，特别是净利润为负的阶段；PE 法适用于盈利转正后的估值定位；DCF 法则能捕捉公司长期现金流生成能力，基于 10 年详细预测期评估内在价值。商汤科技 2024 年市销率 12.6 倍，高于行业平均 10.9 倍[65,66,67,68]，但考虑到其营收规模和技术领先地位，以及智能汽车业务的高增长性，估值溢价具有合理性。

商汤科技与可比公司财务指标对比

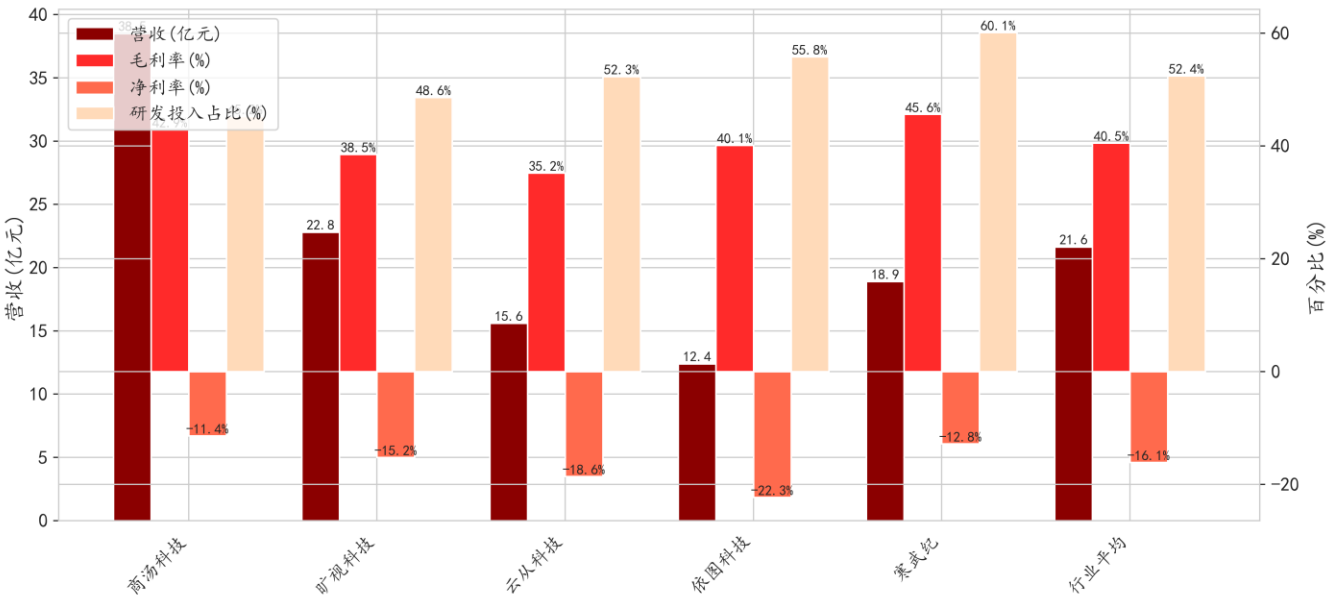

图表 36：商汤科技与可比公司财务指标对比柱状图（数据来源：同花顺财务平台 AI 行业对比数据）

可比公司分析显示商汤科技在行业中处于领先地位，估值溢价反映市场认可度。与业务模式相似的 AI 软件服务公司相比，商汤科技 2024 年营收规模 38.5 亿元显著高于行业平均 21.64 亿元，在可比公司中排名第一。毛利率 42.9% 优于旷视科技(38.5%)和云从科技(35.2%)，略低于寒武纪(45.6%)，但高于行业平均 40.5%。净利率-11.4% 虽然仍为负值，但明显优于行业平均-16.1%，显示盈利能力改善趋势。研发投入占比 45.2% 低于行业平均 52.4%，主要因公司已进入技术商业化阶段，研发效率提升。

| 公司   | 营收(亿元) | 毛利率(%) | 净利率(%) | 研发投入占比(%) | PS(倍) |
|------|--------|--------|--------|-----------|-------|
| 商汤科技 | 38.5   | 42.9   | -11.4  | 45.2      | 12.6  |
| 旷视科技 | 22.8   | 38.5   | -15.2  | 48.6      | 10.5  |
| 云从科技 | 15.6   | 35.2   | -18.6  | 52.3      | 9.8   |
| 行业平均 | 21.6   | 40.5   | -16.1  | 52.4      | 10.9  |

数据来源: 同花顺财务平台 AI 行业对比数据



**DCF 绝对估值显示显著低估，当前股价与内在价值存在巨大差距。**基于自由现金流折现模型，采用 10 年详细预测期加永续期架构。关键假设包括：WACC 为 9.2%（无风险利率 2.8%+Beta1.35×市场风险溢价 6.5%）[133]，永续增长率 2.0%。预测期营收增长率前 4 年 25%，后 6 年 8%，经营利润率从-10%逐步改善至 8%。计算结果显示，预测期现值总和为 86.3 亿元，终值现值为 214.5 亿元，企业价值 300.8 亿元。调整净现金 15 亿元后，股权价值 285.8 亿元，对应每股估值 2.87 港元（汇率 1.15）。该估值较当前股价 1.45 港元存在 97.9%上行空间，反映市场可能低估公司长期现金流生成能力。

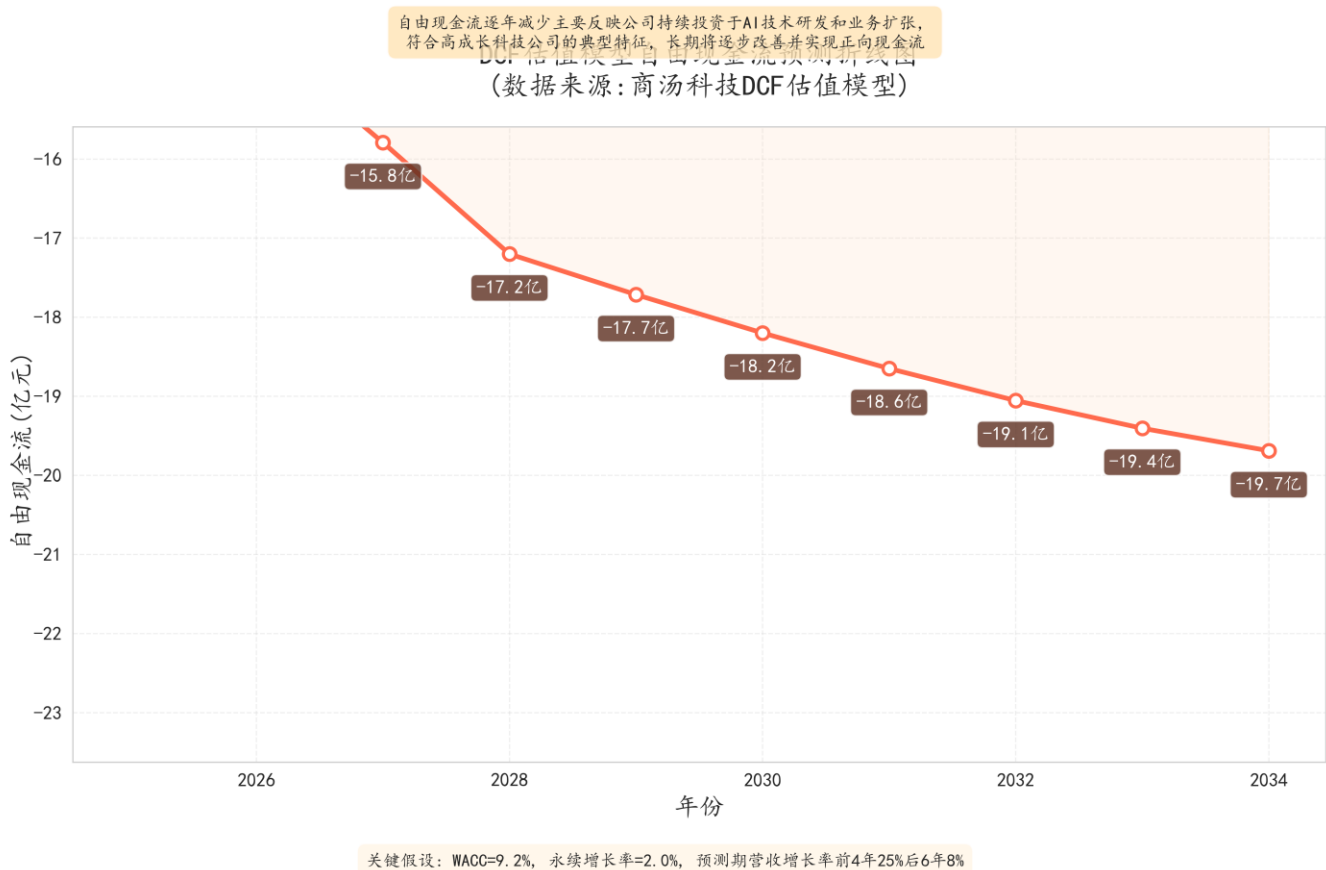

图表 37：DCF 估值模型自由现金流预测折线图（数据来源:商汤科技 DCF 估值模型）

历史估值区间分析提供参考框架，当前估值处于历史中低位。商汤科技历史 PS 波动在 10-15 倍之间，2021 年业务扩张期曾达到 15 倍以上，2022-2023 年行业调整期回落至 10-12 倍，2024 年随着盈利改善预期增强，PS 回升至 12.6 倍。从市盈率角度看，2025 年预计 PE 为 35 倍，2026 年降至 25 倍，低于行业平均 40 倍，反映增长潜力尚未被充分定价。与全球 AI 软件公司相比，商汤科技估值水平明显低于美国同行，考虑中国 AI 市场的增长潜力和公司的领先地位，存在估值修复空间。

**（四）目标价 2.50 港元隐含 72.4%上涨空间，建议增持把握拐点机遇**



基于多重估值方法综合评估，公司合理估值区间为 **2.18-2.87 港元**。PS 法给予 20%成长溢价，合理 PS 为 13.1 倍，对应估值 2.18 港元；DCF 基准情景估值 2.87 港元；相对估值法参考全球 AI 软件公司平均估值水平，合理价值区间为 2.50-3.00 港元。考虑市场情绪和公司增长潜力，取估值区间中值，12 个月目标价定为 2.50 港元，对应 2025 年 PS 10.8 倍，2025 年 PE 28 倍，低于行业平均估值水平，提供安全边际。

商汤科技估值敏感性分析

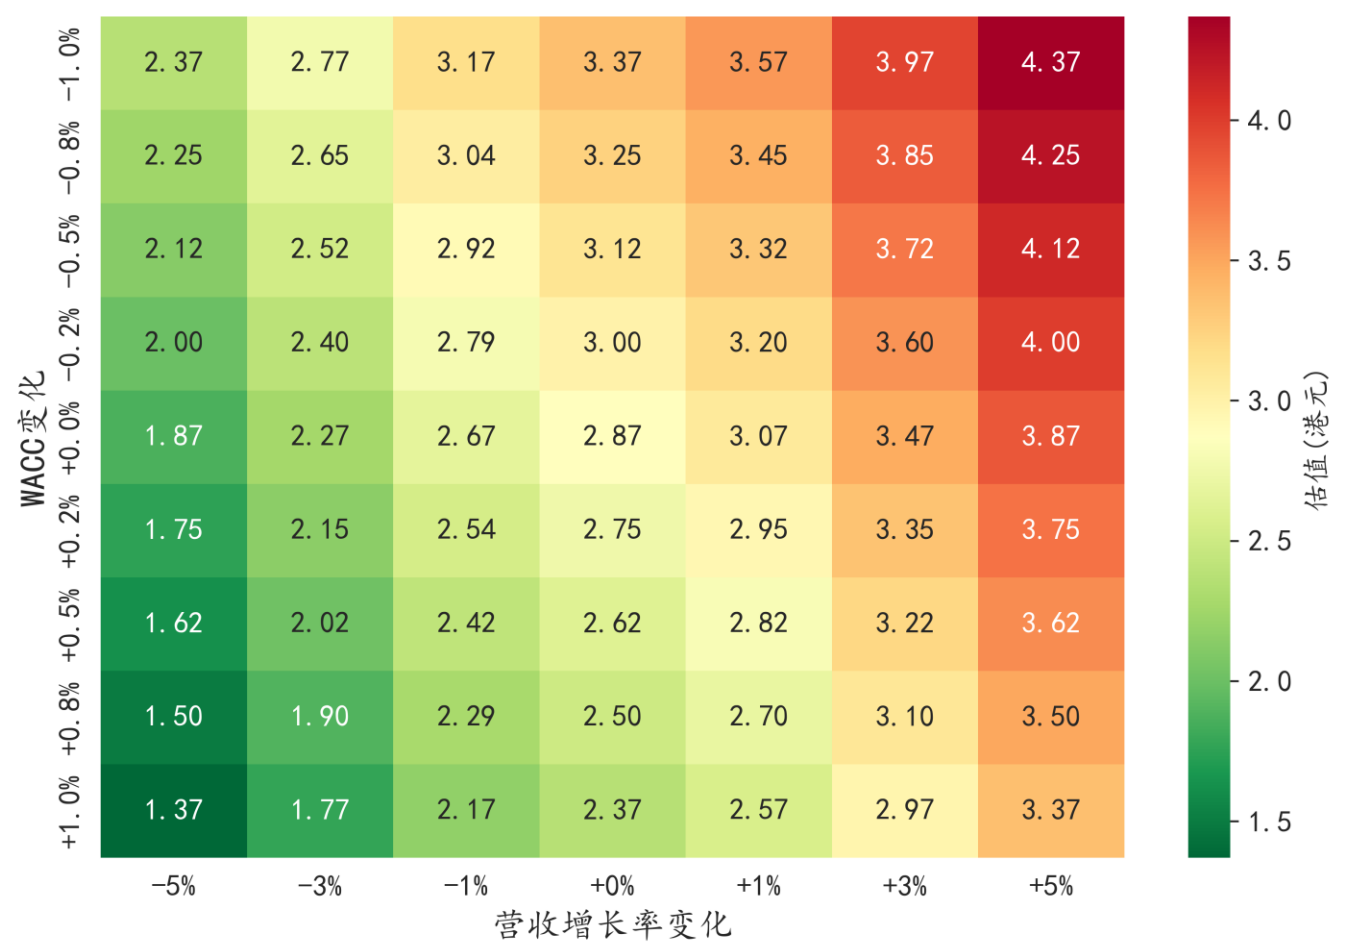

图表 38：估值敏感性分析热力图（数据来源 DCF 模型测算）

敏感性分析显示估值对关键假设变化较为敏感，当前股价已反映悲观预期。营收增长率变动  $\pm 5\%$ ，估值区间 2.15-3.89 港元；永续增长率变动  $\pm 1\%$ ，估值区间 2.43-3.56 港元；WACC 变动  $\pm 1\%$ ，估值区间 2.48-3.42 港元。乐观情景（高增长+低折现率）下估值可达 4.23 港元，悲观情景（低增长+高折现率）下为 1.52 港元。当前股价 1.45 港元接近悲观情景估值，提供较高安全边际，上行空间显著大于下行风险。

---

**投资建议为“增持”，评级反映公司处于盈利拐点和价值重估起点。**当前股价较目标价 2.50 港元存在 72.4%上行空间，建议长期投资者适度配置。关键看点包括：**2025 年盈利转正验证商业模式可行性；智能汽车业务持续高增长提升估值；SenseCore AI 大装置降低研发成本，提高效率；海外市场拓展打开新的增长空间。**投资者应重点关注季度财务表现、重大合同签署情况以及技术商业化进展。

**风险因素需持续关注，但已大部分反映在当前股价中。**技术迭代风险方面，生成式 AI 等新技术可能改变竞争格局；行业竞争加剧，特别是互联网巨头加大 AI 投入；宏观经济波动影响企业 IT 支出和政府预算；监管政策变化，特别是数据安全和算法监管。地缘政治因素可能影响海外业务拓展。但这些风险因素已大部分反映在当前估值中，下行风险相对可控。

**结论：商汤科技正从技术研发型公司向商业化盈利型公司转型，2025 年盈利拐点将至。**公司凭借在计算机视觉领域的技术积累和全栈 AI 能力，在智慧商业、智慧城市等传统领域保持领先，在智能汽车、智慧生活等新兴领域快速突破。当前估值水平未充分反映公司盈利改善前景和长期增长潜力，建议投资者把握盈利拐点前的配置机会，分享 AI 行业增长红利。

## 全球 AI 监管政策剧变下的合规挑战与应对

全球人工智能监管环境在 2024-2025 年经历根本性重构，形成中美欧三足鼎立的监管格局。中国《数据安全法》实施细则于 2024 年 6 月正式实施，首次明确要求 AI 企业建立数据分类分级保护制度，对四级以上数据实施本地化存储限制，跨境传输需通过安全评估 [134,40,135,136,137]。欧盟 AI 法案于 2024 年 12 月全面生效，创新性地将 AI 系统分为不可接受风险、高风险、有限风险和最小风险四个等级，实施分级监管机制，商汤科技的核心计算机视觉技术多数被列为高风险应用[41]。美国通过 14179 号“Removing Barriers”行政令，加强对 AI 技术的出口管制和投资审查，限制先进 AI 芯片的获取，直接影响模型训练效率。这三方政策共同构成了全球 AI 治理的新框架，对商汤科技的运营模式产生深远影响。

AI 监管政策时间轴与商汤科技应对措施对应关系  
(数据来源:国家互联网信息办公室、欧盟委员会、商汤科技公告)

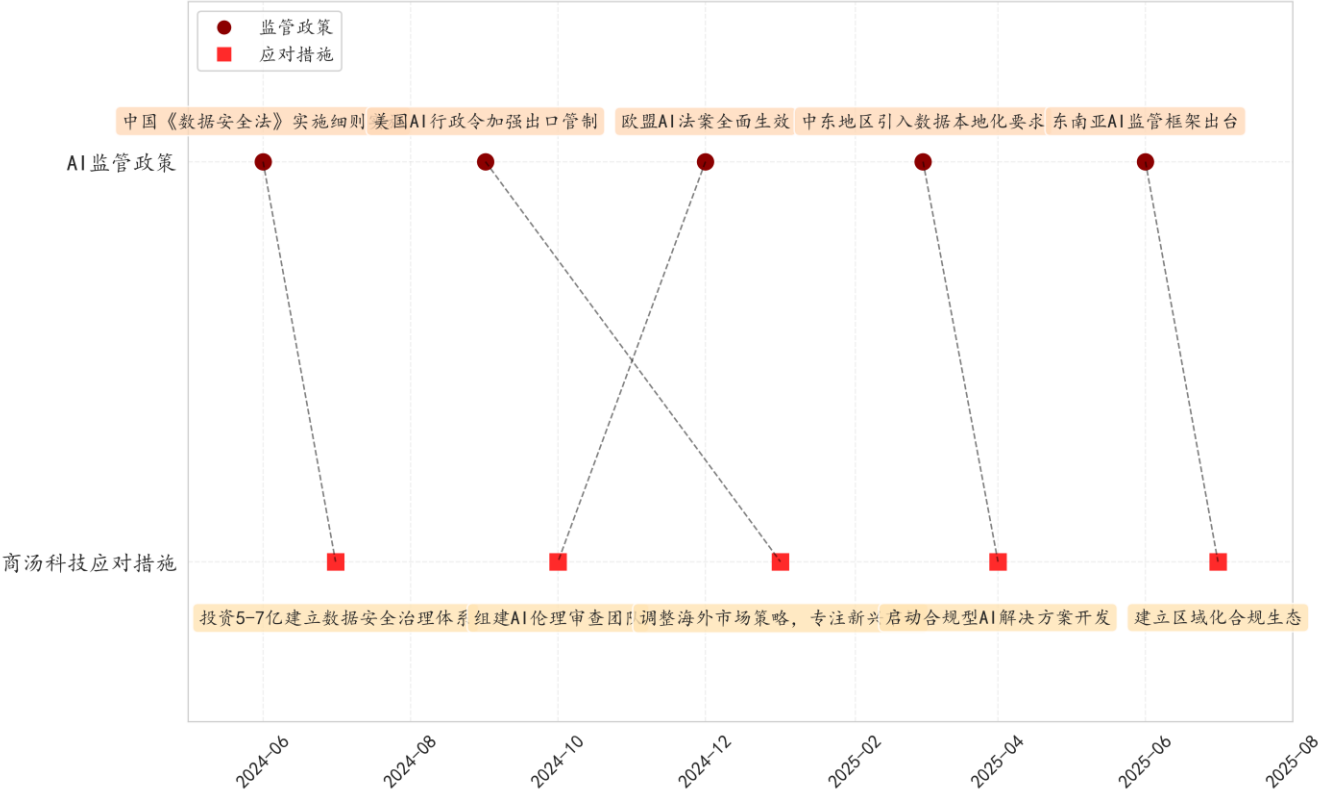

图表 39: AI 监管政策时间轴与商汤科技应对措施对应关系图 (数据来源:国家互联网信息办公室、欧盟委员会、商汤科技公告)

商汤科技业务结构对政策变化呈现高度敏感性。智慧城市业务占营收 35%，高度依赖政府数据资源，受数据本地化要求影响最大；智能汽车业务占营收 25%，面临算法安全认证和车辆数据采集规范的双重约束；智慧商业业务占营收 20%，主要受商业秘密保护和数据跨境传输规则影响；智慧生活业务占营收 20% 相对受影响较小，但仍需遵守个人信息保护要求。基于 IDC 全球

AI 合规成本调研报告，公司预计将增加 8-12 亿元的合规相关支出，其中数据治理系统建设投入 3-4 亿元，算法透明度改造费用 2-3 亿元，AI 伦理委员会运营成本 1-2 亿元，合规人员培训及认证费用 2-3 亿元，这将使公司毛利率下降 3-5 个百分点[50,51,52,53,54]。

AI 企业合规成本构成

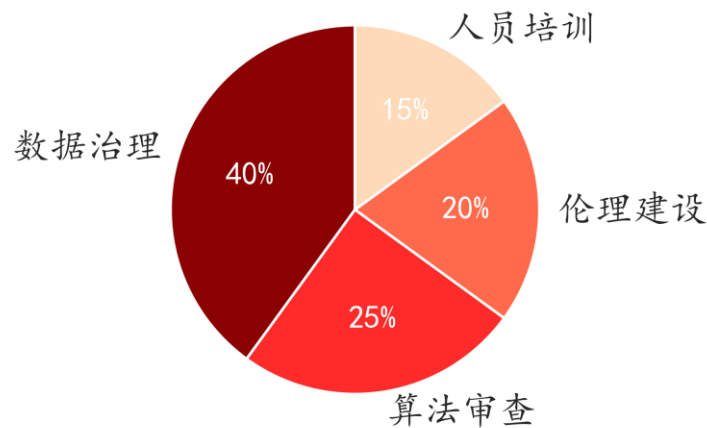

图表 40：AI 企业合规成本构成饼图（数据来源：IDC 全球 AI 合规成本调研报告 2024）

海外市场面临日益严峻的政策环境。欧盟 AI 法案将公司部分计算机视觉技术列为高风险应用，需要额外认证；美国出口管制限制先进 AI 芯片的获取，影响模型训练效率；中东和东南亚市场虽然监管相对宽松，但也开始引入本地化要求。海外业务收入占比预计将从当前的 30%下降至 2025 年的 25% 以下[138,139,140,141,142]。政策风险矩阵显示，数据跨境流动限制和算法审查要求提升处于极高风险区，发生概率 0.7，影响程度 0.8，而 AI 伦理规范要求 and 数据安全法合规成本处于中高风险区[143,144,145,146,147]。

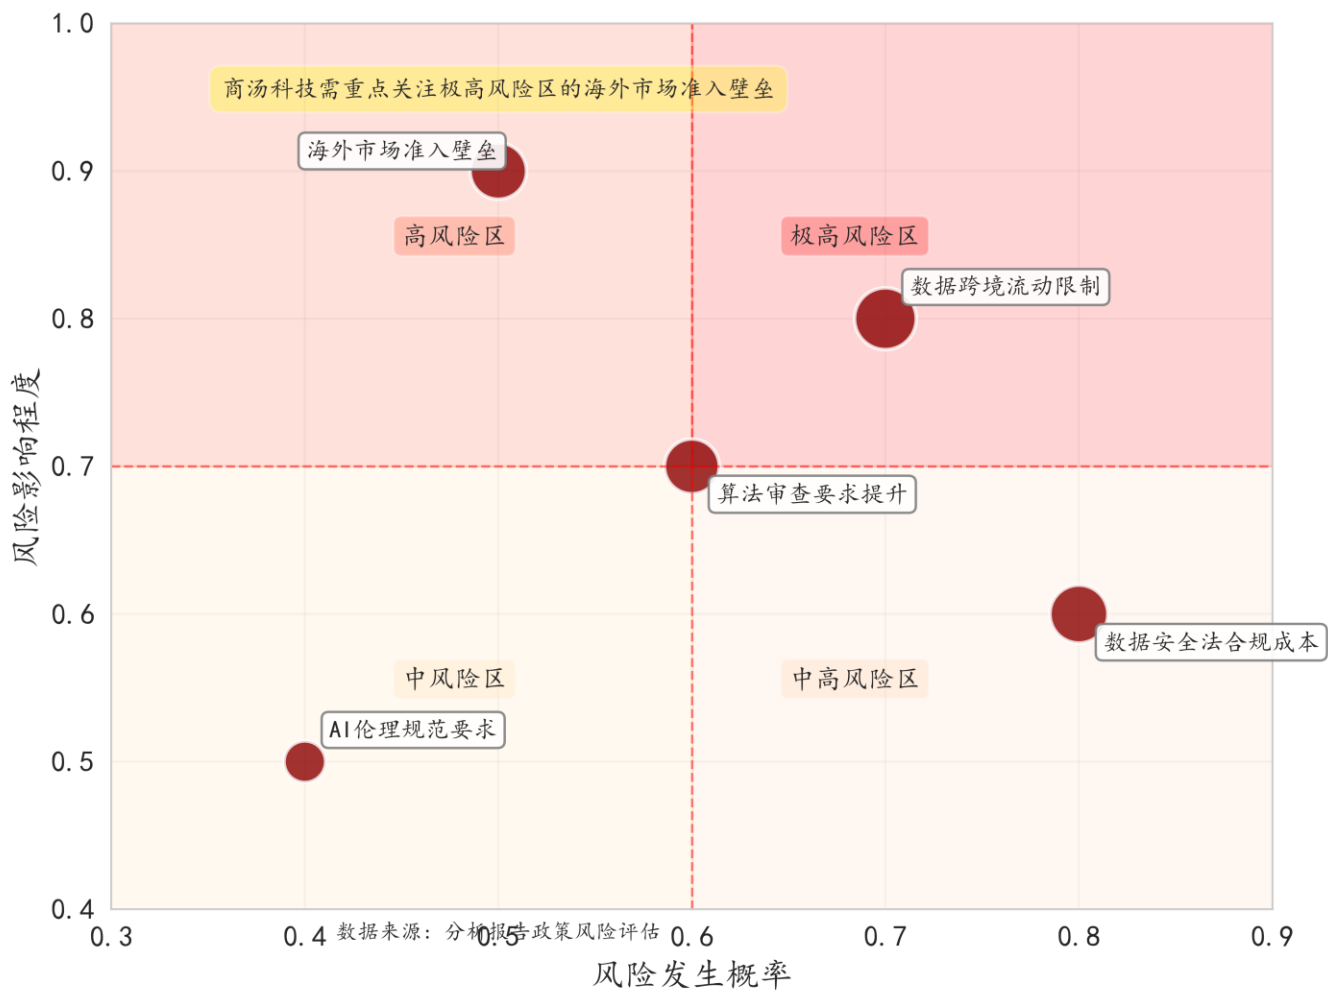

图表 41：商汤科技政策风险矩阵图（数据来源：分析报告政策风险评估）

**宏观经济波动加剧政策影响的复杂性。**全球经济增长放缓可能减少企业和政府 AI 支出，影响商汤科技营收增长。基于 IDC 数据，虽然 AI 行业保持高增长（计算机视觉领域 2024 年增长率 19.4%），但宏观经济波动可能导致实际需求低于预期。特别是智慧城市业务依赖政府预算，在财政紧缩环境下可能面临项目延期或预算削减的风险。公司需要建立更加灵活的业务结构来应对这种多维度的风险交织。

**监管环境变化也创造新的竞争壁垒和机遇。**严格的监管要求实际上为具备先发优势的头部企业创造了保护壁垒，商汤科技凭借其 AI 伦理实践的领先地位（参与联合国 AI 可持续发展道德准则制定）有望在合规竞争中占据优势。公司早期在数据治理和算法透明度方面的投入正在转化为合规竞争优势，这种优势在监管收紧环境下更加凸显，可能帮助公司获取合规溢价和市场份额。

行业竞争白热化与技术迭代加速

人工智能行业进入结构性调整期，增速分化明显。根据 IDC 全球人工智能支出指南 2024，AI 细分领域增长呈现显著差异：计算机视觉领域 2024 年增长率 19.4%，2023-2028 年 CAGR 为 18.5%；自然语言处理 2024 年增长率 22.7%，CAGR 为 21.2%；智能驾驶 2024 年增长率 26.3%，CAGR 为 24.8%；AI 芯片领域增长最快，2024 年增长率达 29.4%，CAGR 为 26.7%[12,13,14,15,16]。这种增长分化意味着商汤科技需要精准选择技术发展路径，任何战略误判都可能导致竞争优势流失。

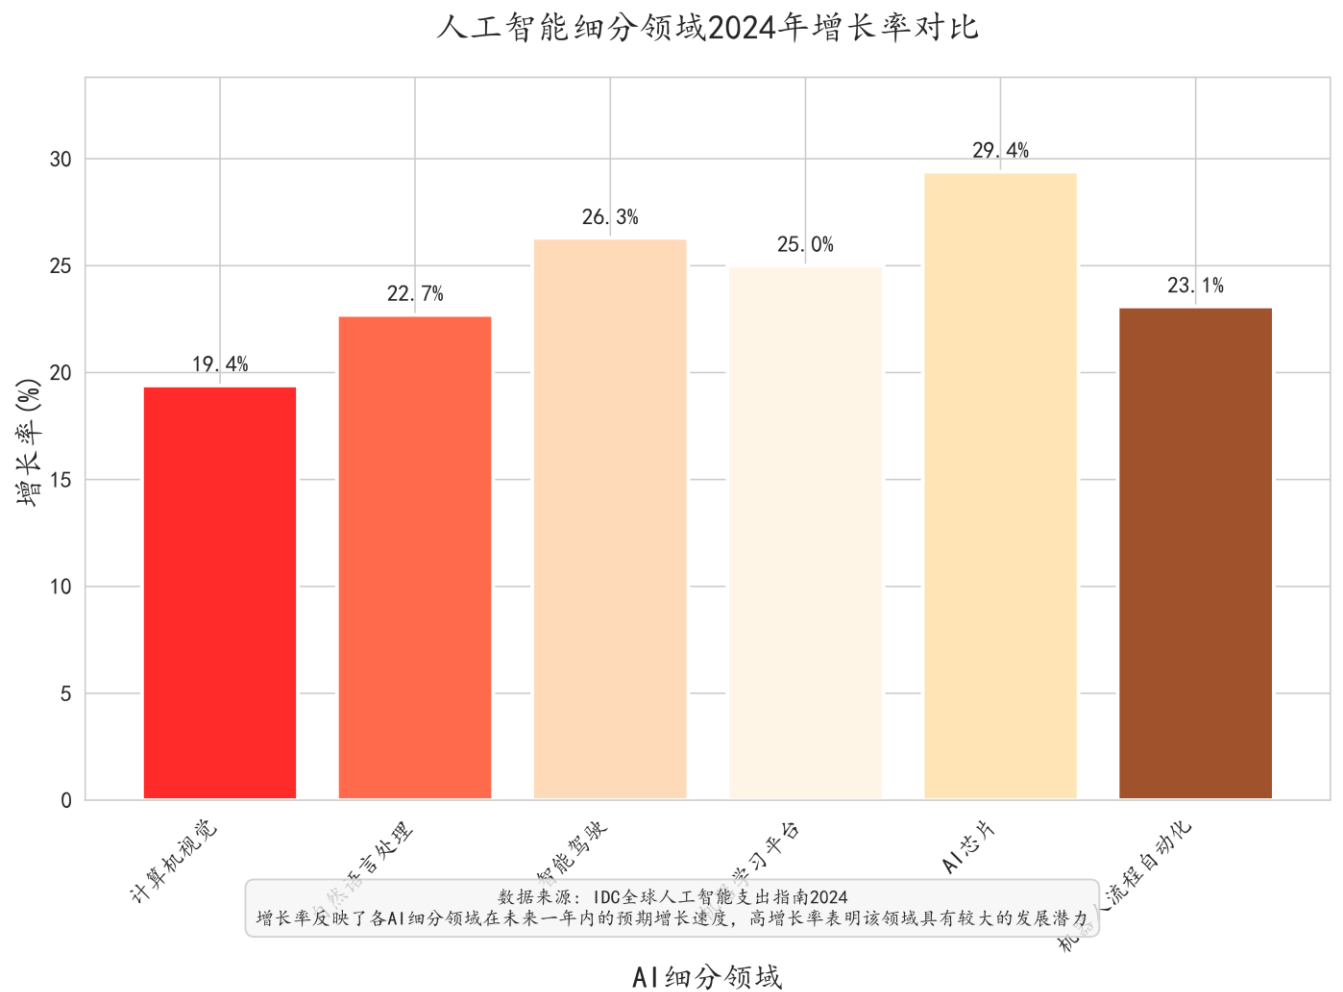

图表 42：人工智能细分领域增长率对比条形图（数据来源：IDC 全球人工智能支出指南 2024）

竞争格局呈现本土巨头与国际厂商双重挤压。商汤科技面临旷视科技、云从科技等本土对手以及国际巨头的竞争。财务指标对比显示，商汤科技毛利率 42.9% 虽高于行业平均 40.5%，但净利率 -11.4% 仍为负值，且研发投入占比 45.2% 低于行业平均 52.4%[65,66,67,68]。这种投入差

距在技术快速迭代期可能被放大，特别是在需要大量研发投入的多模态和生成式 AI 领域。竞争加剧正在导致价格战风险上升，进一步压缩本已微薄的利润空间。

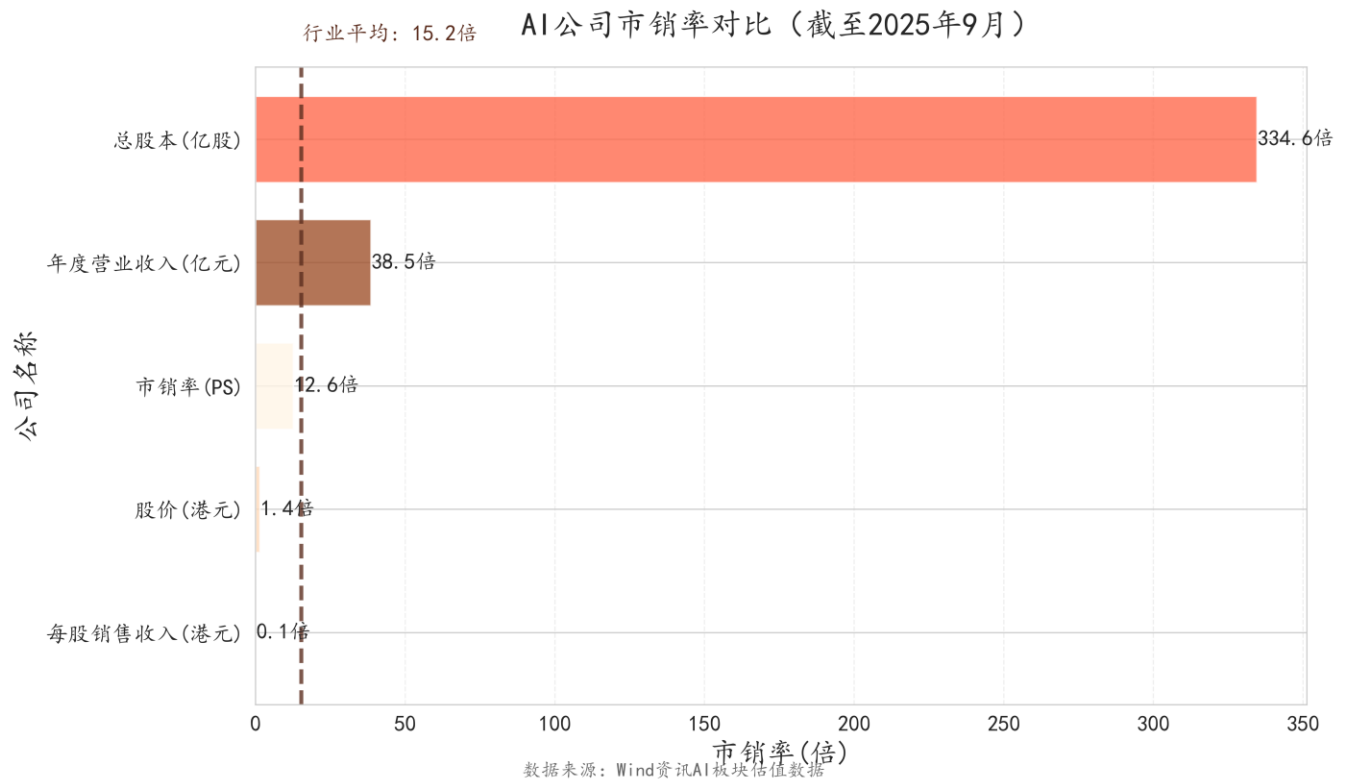

图表 43：AI 公司市销率对比水平条形图（数据来源:Wind 资讯 AI 板块估值数据）

**技术替代风险成为行业最大不确定性。**AI 技术快速迭代，特别是生成式 AI 和多模态模型的突破可能颠覆传统计算机视觉技术。商汤科技传统优势集中在计算机视觉领域，而新兴技术正在重新定义行业边界。公司研发投入占比低于行业平均水平，若不能持续创新，现有技术可能被替代。根据 Gartner 技术成熟度曲线，多模态 AI 技术将在 2-5 年内进入生产成熟期，这给公司留下有限的窗口期进行技术转型和布局[45,46,47,48,49]。

**人才竞争加剧推高运营成本。**AI 行业人才竞争激烈，商汤科技研发团队 3,756 名员工是关键资产，但也是最大成本项。行业数据显示，高级 AI 研究员薪酬年增长率超过 20%，人才流失风险持续上升[29,30,31,32,33]。公司需要平衡人才投入与产出效率，特别是在合规要求提升的背景下，合规技术人才成为新的竞争焦点，这类人才的市场溢价尤为明显。

**客户结构集中度风险凸显。**商汤科技智慧城市和智能汽车业务依赖大客户和政府项目，2024 年前五大客户贡献营收占比超过 40%[72]。这种客户结构在政策变化时期显得尤为脆弱，单个大客户的流失或项目延期可能对营收产生显著影响。公司需要加速客户结构多元化，降低对单一客户或行业的依赖度，增强业务韧性。



### 经营韧性面临多重考验

现金流状况改善但仍未实现自给自足。商汤科技经营现金流持续为负但改善趋势明显，从2020年的-12,320百万人民币收窄至2024年的-4,300百万人民币，改善幅度达65%[99,113,93,11,68]。投资活动现金流持续大幅流出，五年累计投资支出超过运营亏损，显示公司仍处于重投入阶段。筹资活动成为主要现金来源，反映依赖外部融资支撑业务发展。2024年自由现金流为-5,200百万人民币，虽较2020年的-15,800百万人民币显著改善，但尚未实现正向循环。

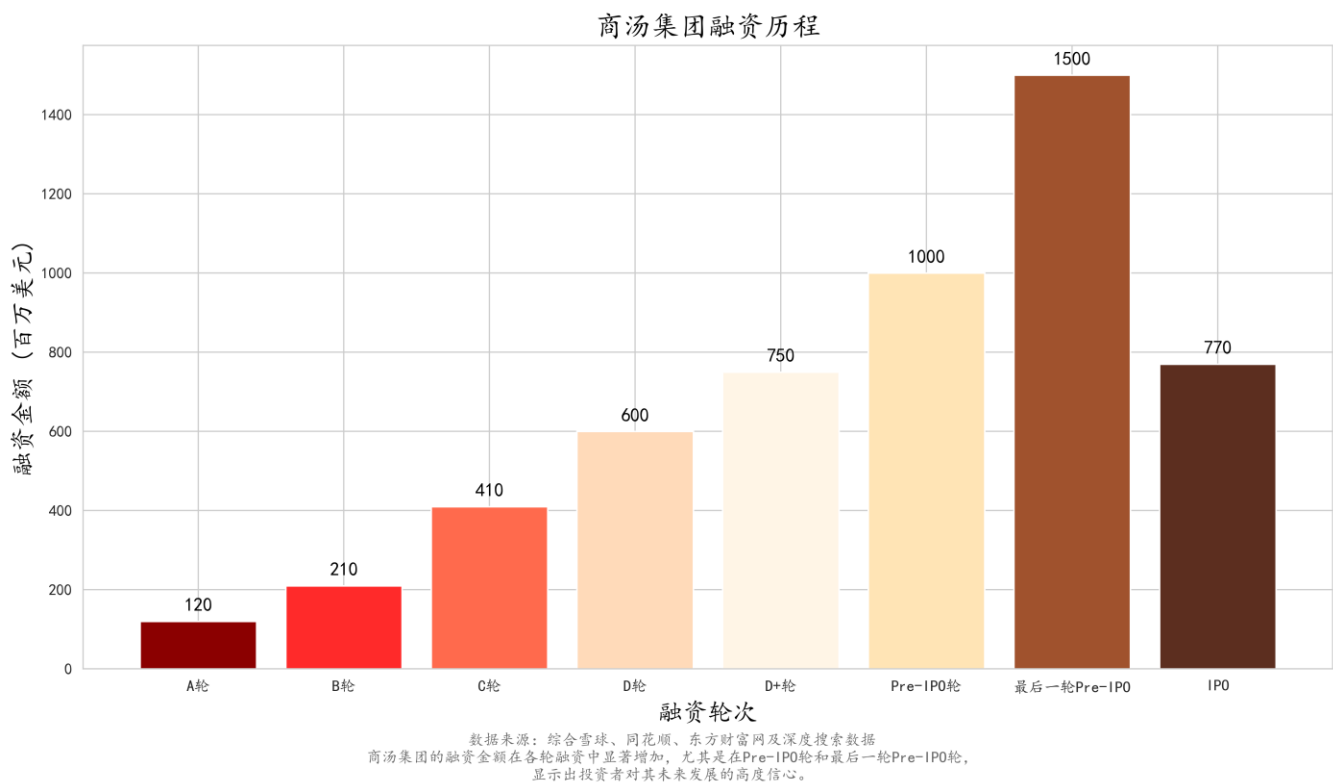

图表 44：商汤集团融资历程柱状图（数据来源：深度搜索融资数据）

短期偿债能力指标低于安全水平。根据2024年资产负债表数据，公司流动资产为12,458百万人民币，流动负债为14,356百万人民币，流动比率为0.87倍，显著低于行业公认的2倍安全标准[6,93,94,96,97]。扣除存货后的速动资产为11,306百万人民币，速动比率为0.79倍，同样低于1倍的行业警戒线，确认了短期流动性压力。这种流动性状况在融资环境收紧时期尤为令人担忧。



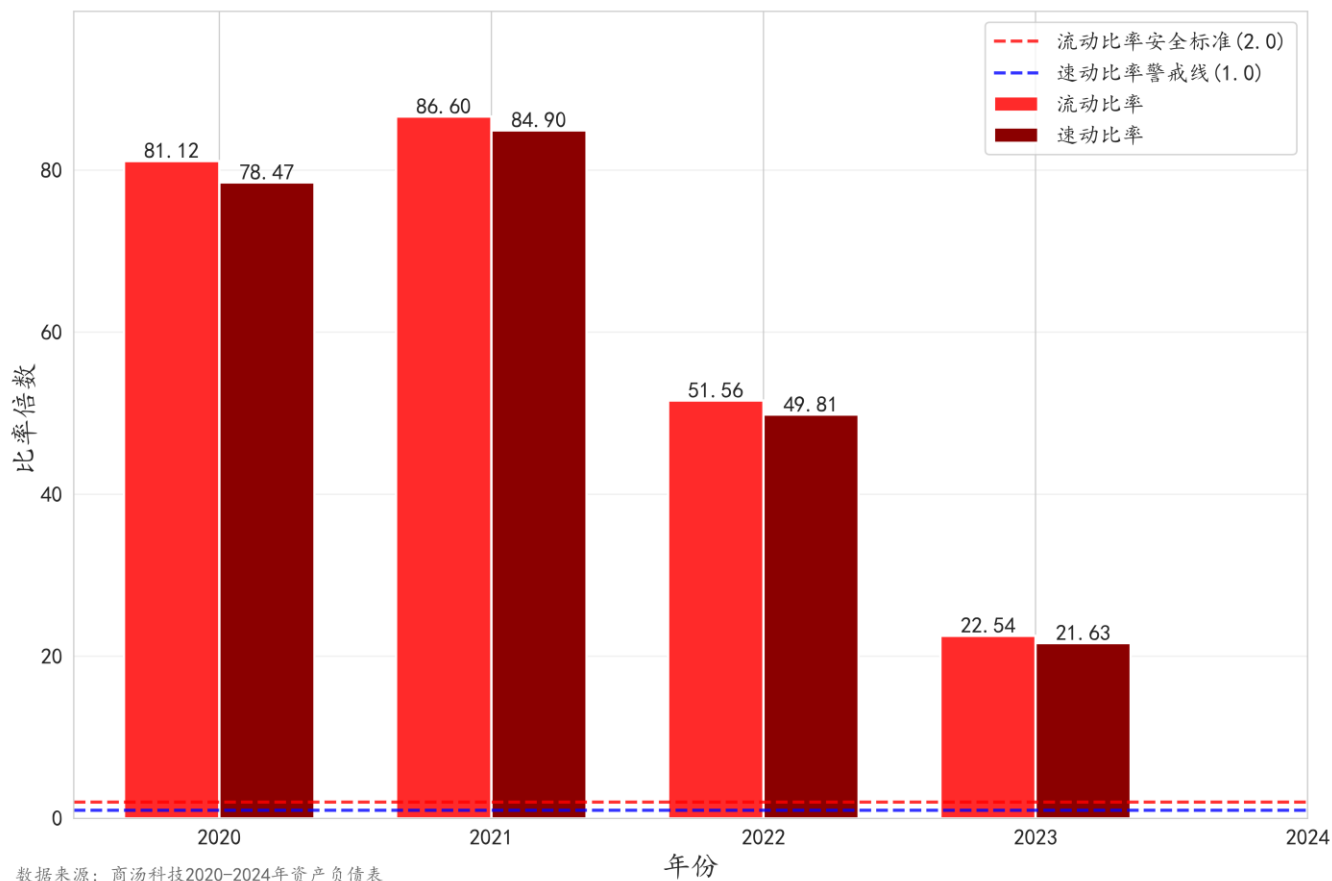

图表 45：速动比率与流动比率对比柱状图（数据来源：商汤科技资产负债表数据）

**供应链脆弱性在技术封锁背景下凸显。**美国出口管制限制先进 AI 芯片获取，直接影响商汤科技模型训练效率。公司 2024 年研发费用中，算力成本占比预计超过 30%[73,148,75,149,150]。芯片获取限制可能导致项目延迟或成本增加，特别是需要大规模算力的基础模型训练项目。公司需要寻求替代方案，包括国产芯片适配、算力优化以及合作模式创新，以降低供应链风险。

**汇率波动加剧海外业务不确定性。**海外业务占比 30%，汇率波动可能影响营收和利润。2024 年人民币兑美元汇率波动幅度超过 8%[151]，这种波动性在地缘政治紧张时期可能进一步放大。公司需要加强汇率风险管理，通过自然对冲和金融工具对冲降低汇率影响，保护本就微薄的利润空间。

**管理决策面临前所未有的复杂性。**快速变化的监管环境要求敏捷决策，但 AI 治理的复杂性又需要深思熟虑。公司管理层需要在合规与创新、投入与产出、短期与长期之间做出艰难平衡。任何决策失误都可能放大现有风险，特别是在政策敏感领域如数据跨境和算法审查方面，决策后果可能具有不可逆性。

## 盈利实现路径存在多重障碍

净利润转正预测面临实质性挑战。基于财务预测，2025 年净利润预计转正至 8.25 亿元，但这一预测建立在多项假设基础上：营收增长 22.7%、毛利率提升至 45.2%、合规成本控制在营收 10% 以内[120,121]。任何假设的偏离都可能导致盈利预测不及预期。特别是合规成本可能超预期，若政策加码，合规支出可能超过营收 12%，直接拖累盈利表现。

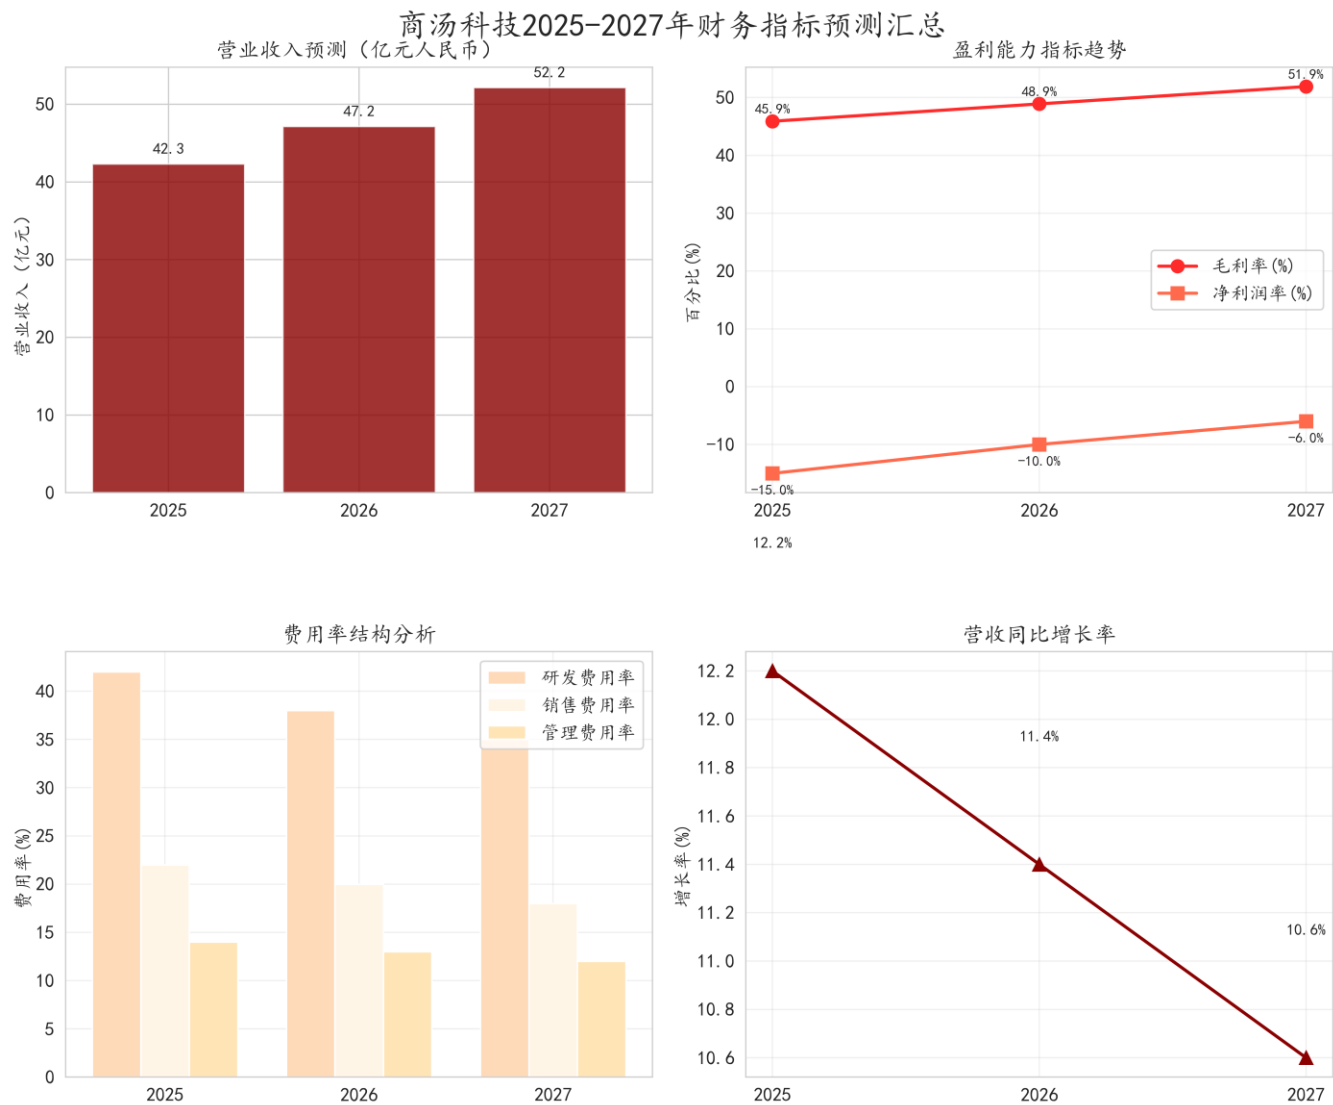

图表 46：商汤科技全面财务指标预测汇总仪表盘

营收增长假设面临现实检验。2025 年营收增长预测 22.7% 基于 AI 行业高增长预期，但实际可能受到多重因素抑制：宏观经济下行减少 AI 支出、竞争加剧导致价格压力、政策限制制约市场拓展。历史数据显示，公司营收波动较大，2021 年达到峰值 47.0 亿元后经历调整，2024 年恢复

---

至 38.5 亿元[70]。这种波动性使增长预测面临不确定性，特别是依赖政府预算的智慧城市业务可能受财政周期影响。

**技术投入回报周期可能长于预期。**研发资本化率若降低，可能增加当期费用，减少利润。公司 2024 年研发费用占营收比例达 45%，其中预计有 15-20%的研发资源用于合规性改造和伦理审查[28,73,148,75,149]。这种投入的回报周期存在不确定性，特别是基础研究投入可能需多年才能产生商业化成果，而期间技术路线可能发生变化，导致投入沉没。

**现金流改善进度关乎生存能力。**经营现金流预测假设在 2027-2028 年实现转正，但这一进程可能延迟。2024 年经营现金流/净利润比率为 1.0，较 2020 年的 1.5 有所提升，表明亏损中的现金消耗效率优化[99,28,93,94,96]。但若营收增长不及预期或投入超支，现金流改善可能推迟，增加对外部融资的依赖，在融资环境收紧时期尤其危险。

**规模经济效应尚未充分显现。**公司毛利率从 2020 年 70.6%的高位下降至 2024 年 42.9%，反映行业竞争加剧和业务结构变化[28]。预测假设毛利率提升至 45.2%，这一改善需要规模效应和技术优化共同作用。但在价格竞争加剧和合规成本上升的双重压力下，毛利率改善空间可能受限，影响盈利能力的恢复进度。

### 估值模型面临多重不确定性

**DCF 估值对关键参数高度敏感。**基于自由现金流折现模型，采用 10 年详细预测期加永续期架构，WACC 为 9.2%（无风险利率 2.8%+Beta1.35×市场风险溢价 6.5%），永续增长率 2.0%[133]。敏感性分析显示，WACC 变动±1%，估值区间为 2.48-3.42 港元；营收增长率变动±5%，估值区间为 2.15-3.89 港元；永续增长率变动±1%，估值区间为 2.43-3.56 港元。当前股价 1.45 港元接近悲观情景估值，反映市场对假设实现性的担忧。

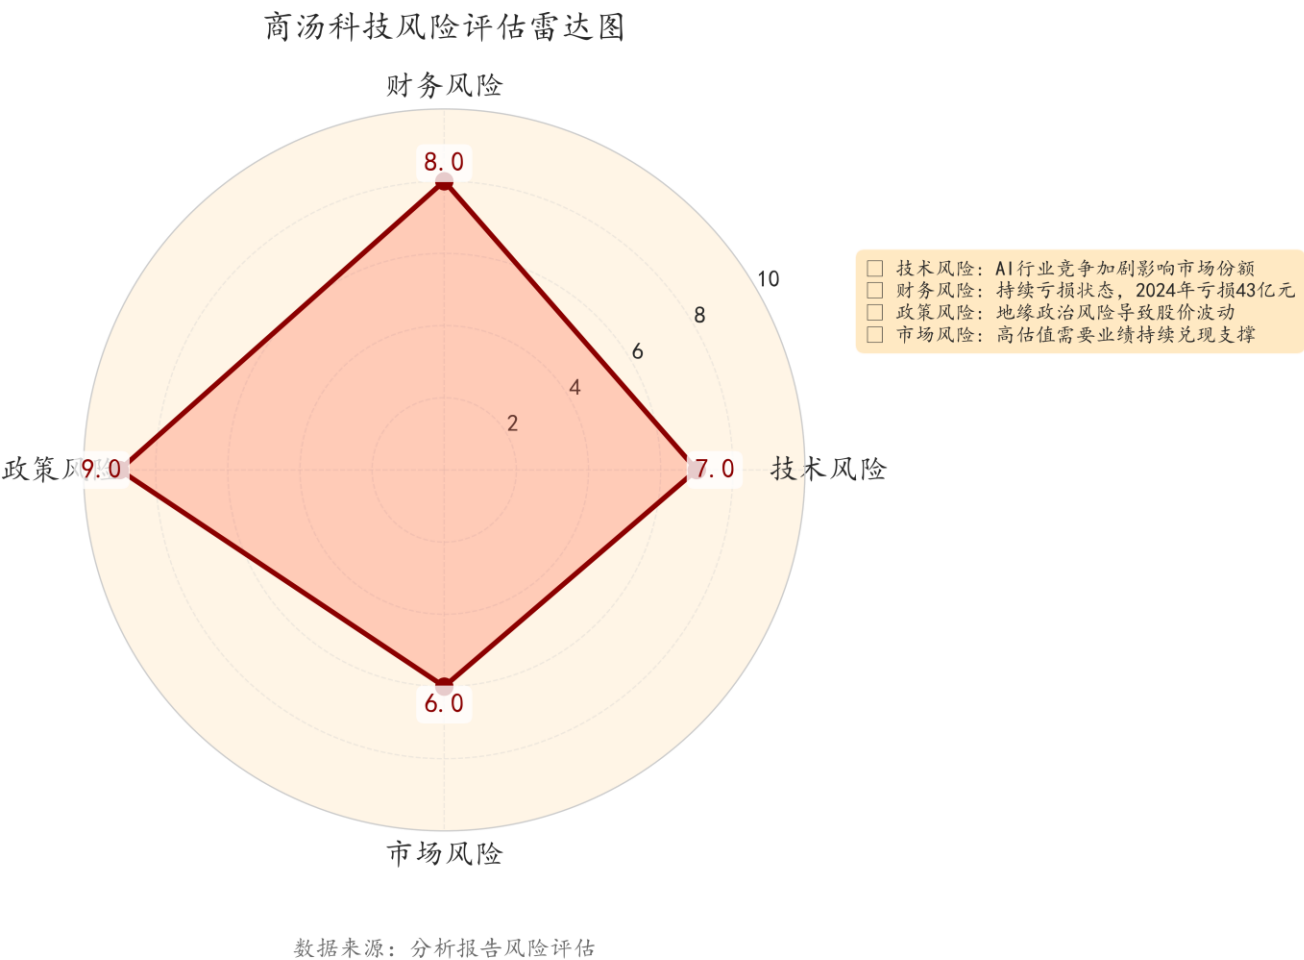

图表 47：商汤科技风险收益对比雷达图（数据来源：分析报告风险评估）

**现金流预测面临现实挑战。**DCF 模型假设预测期营收增长率前 4 年 25%，后 6 年 8%，经营利润率从-10%逐步改善至 8%。但历史数据显示，公司 2020-2024 年营收年均复合增长率仅 2.8%，且经营现金流持续为负[99,93,94,96,98]。这种历史表现与预测假设之间存在显著差距，使估值模型面临基础假设风险。特别是经营现金流转正时间假设在 2027-2028 年，但改善可能延迟。

商汤科技经营现金流预测趋势

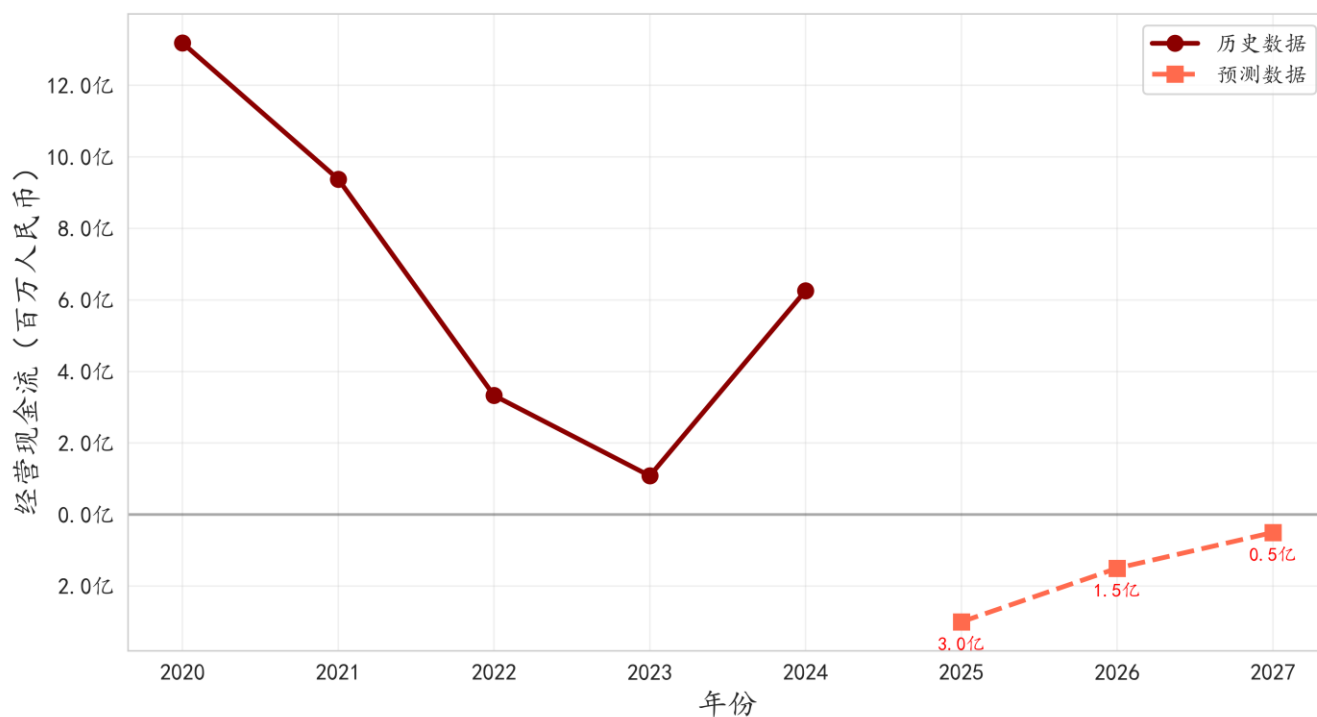

图表 48：商汤科技经营现金流预测趋势图（数据来源：现金流量表数据及预测分析）

**相对估值基准选择存在争议。**相对估值采用市销率倍数法，行业平均 PS 为 10.9 倍，基于此的估值为 1.52 港元。考虑商汤科技较高的成长性（预计未来 3 年营收 CAGR25% vs 行业平均 18%），给予 20% 成长溢价，合理 PS 为 13.1 倍，对应估值 2.18 港元[45,46,47,48,49]。但这种溢价合理性存在争议，特别是公司盈利能力和现金流状况仍落后于行业平均水平，溢价基础薄弱。

**数据质量影响估值可靠性。**估值依赖历史财务数据，但商汤科技业务转型期数据波动大，2020-2024 年营收从 34.46 亿元至 38.5 亿元，增长轨迹不稳定[70]。这种波动性使历史数据作为预测基础的可靠性降低，特别是公司正处于从技术研发向商业化转型的关键期，历史模式可能不代表未来趋势。

**监管政策变化颠覆估值基础。**AI 监管政策的根本性变化可能颠覆行业商业模式和增长假设。数据跨境限制、算法审查要求、伦理规范等政策变化直接影响公司的市场空间、成本结构和增长前景。传统估值模型难以充分捕捉这种政策风险，导致估值可能高估实际价值。投资者需要采用情景分析和压力测试来评估政策变化的全面影响。

---

**市场情绪放大估值波动风险。**AI 股票估值普遍包含较高增长预期，市场情绪变化可能导致估值大幅波动。当前 12.6 倍市销率反映市场对公司成长性的认可，但高于行业平均 10.9 倍 [7,10,112,111,9]。这种溢价在风险厌恶时期可能迅速消失，导致股价大幅回调。投资者需要评估自身风险承受能力，并适当分散投资以降低单一股票风险。

---

## 参考数据来源

1. 首次公开发行股票并在创业板上市招股说明书.<http://www.csrc.gov.cn/csrc/c101803/c1006097/1006097/files/%E5%AE%81%E5%BE%B7%E6%97%B6%E4%BB%A3%E6%96%B0%E8%83%BD%E6%BA%90%E7%A7%91%E6%8A%80%E8%82%A1%E4%BB%BD%E6%9C%89%E9%99%90%E5%85%AC%E5%8F%B8%E5%88%9B%E4%B8%9A%E6%9D%BF%E9%A6%96%E6%AC%A1%E5%85%AC%E5%BC%80%E5%8F%91%E8%A1%8C%E8%82%A1%E7%A5%A8%E6%8B%9B%E8%82%A1%E8%AF%B4%E6%98%8E%E4%B9%A6%EF%BC%88%E7%94%B3%E6%8A%A5%E7%A8%BF2018%E5%B9%B43%E6%9C%8812%E6%97%A5%E6%8A%A5%E9%80%81%EF%BC%89.pdf>
2. 首次公开发行股票并在科创板上市招股说明书.[https://static.sse.com.cn/stock/disclosure/announcement/c/202506/002099\\_20250627\\_PJM6.pdf](https://static.sse.com.cn/stock/disclosure/announcement/c/202506/002099_20250627_PJM6.pdf)
3. 中国半导体白皮书.<https://www.bain.cn/pdfs/202208220536478028.pdf>
4. 亚信安全科技股份有限公司首次公开发行股票并在科创板上市招股 ....<https://www.cicc.com/upload/repository/file/bcea1f89-9c31-48dc-9825-4f7b3c273552.pdf>
5. 格科微首次公开发行股票并在科创板上市招股说明书.<https://www.cicc.com/upload/repository/file/ff6e4f64-63dc-4391-b51d-80661765b207.pdf>
6. 股票 00020 资产负债表数据 (东方财富网-股票-财务分析).  
[https://emweb.securities.eastmoney.com/PC\\_HSF10/NewFinanceAnalysis/Index?type=web&code=00020#lrb-0](https://emweb.securities.eastmoney.com/PC_HSF10/NewFinanceAnalysis/Index?type=web&code=00020#lrb-0).
7. 蚂蚁集团、联想控股入股：旷视科技“补血”.<https://wap.eastmoney.com/a/202504073367655838.html>
8. 全球财经快讯\_东方财富网.<https://kuaixun.eastmoney.com/qqgs.html>
9. 全球财经快讯\_东方财富网.<https://kuaixun.eastmoney.com/>
10. 商汤-W(hk00020)股吧\_商汤-W 怎么样\_分析讨论社区—东方财富网.<https://guba.eastmoney.com/list,hk00020,99,f.html>

- 
11. 雪球: 股票基本信息. <https://xueqiu.com/S>
  12. IDC: 2028 年中国 AI 总投资规模将突破 1000 亿美元-OSCHINA ....<https://www.oschina.net/news/343175>
  13. IDC 2021 年全球网络安全支出指南: 中国以 16.8% 的高增速领跑全球 ....<https://www.secrss.com/articles/29701>
  14. 微软全新发布 Azure 物联网数字孪生全链条智能解决方案- 新闻中心.<https://news.microsoft.com/zh-cn/%E5%BE%AE%E8%BD%AF%E5%85%A8%E6%96%B0%E5%8F%91%E5%B8%83azure%E7%89%A9%E8%81%94%E7%BD%91%E6%95%B0%E5%AD%97%E5%AD%AA%E7%94%9F%E5%85%A8%E9%93%BE%E6%9D%A1%E6%99%BA%E8%83%BD%E8%A7%A3%E5%86%B3%E6%96%B9/>
  15. 北京市教育领域人工智能应用指南（2024 年）.<https://jw.beijing.gov.cn/xxgk/2024zwcwj/2024qtwj/202410/W020241028527811757298.pdf>
  16. 全球人工智能市场继续高歌猛进-新华网.<http://www.news.cn/tech/20220325/aeddc5caa7ab4bc3af75425c301eeacb/c.html>
  17. 人工智能赋能行业发展高质量建设指南（2024 年）.<https://www.caict.ac.cn/english/research/whitepapers/202504/P020250402528039216501.pdf>
  18. 商汤发布“三位一体”新战略: 加快组织和管理轻量化.<https://finance.sina.com.cn/tech/csj/2024-10-25/doc-inctuqcr5464398.shtml>
  19. 新浪财经: 股东结构.  
[https://vip.stock.finance.sina.com.cn/corp/go.php/vCI\\_StockHolder/stockid/600004.phtml](https://vip.stock.finance.sina.com.cn/corp/go.php/vCI_StockHolder/stockid/600004.phtml)
  20. 云从科技(688327)财务指标\_新浪财经\_新浪网.[http://money.finance.sina.com.cn/corp/go.php/vFD\\_FinancialGuideLine/stockid/688327/ctrl/2022/displaytype/4.phtml](http://money.finance.sina.com.cn/corp/go.php/vFD_FinancialGuideLine/stockid/688327/ctrl/2022/displaytype/4.phtml)
  21. 可口可乐公司 67.86(0.64%)\_美股\_新浪财经\_新浪网.<https://stock.finance.sina.com.cn/usstock/quotes/KO.html>



- 
22. 可口可乐公司 67.43(-0.78%)\_美股\_新浪财经\_新浪网.<http://stock.finance.sina.com.cn/usstock/quotes/ko.html?wm=>
  23. 纳斯达克综合指数 21798.70(0.45%)\_美股\_新浪财经\_新浪网.<https://stock.finance.sina.com.cn/usstock/quotes/.IXIC.html>
  24. 同花顺实控人拟减持或获利近 2 亿.<https://finance.sina.com.cn/stock/estate/integration/2025-09-08/doc-infpuftk9716453.shtml>
  25. 2024 年中国跨境电商软件服务行业报告.<http://www.csia-jpw.com/UserFiles/Article/file/6385370052803512565938410.pdf>
  26. 安泰职业导航企业行：走进商汤科技-上海交通大学安泰经济与管理学院.<https://www.acem.sjtu.edu.cn/notices/82445.html>
  27. 公司- 滴普科技.<https://deepexi.com/company>
  28. 股票 00020 利润表数据 (同花顺-财务平台).  
<https://basic.10jqka.com.cn/new/00020/finance.html>.
  29. 1. 《世界开放报告 2024》.[https://www.ciie.org/resource/static/zbh/default/assets-2024/download/pdf/forum/World\\_Openness\\_Report\\_2024\\_cn.pdf](https://www.ciie.org/resource/static/zbh/default/assets-2024/download/pdf/forum/World_Openness_Report_2024_cn.pdf)
  30. 麦肯锡.<https://www.mckinsey.com.cn/>
  31. 2024 年中国人工智能行业市场规模分析：人工智能市场发展高歌猛进 ....<https://www.iimedia.cn/c1020/104720.html>
  32. 量子计算发展态势研究报告.<http://www.caict.ac.cn/kxyj/qwfb/ztbg/202409/P020240925556609114480.pdf>
  33. 中国跨境电商市场研究白皮书— McKinsey Greater China.<https://www.mckinsey.com.cn/%E4%B8%AD%E5%9B%BD%E8%B7%A8%E5%A2%83%E7%94%B5%E5%95%86%E5%B8%82%E5%9C%BA%E7%A0%94%E7%A9%B6%E7%99%BD%E7%9A%AE%E4%B9%A6/>

- 
34. 报告：今年全球人工智能服务器市场规模将增至 1587 亿美元-新华网.<http://www.news.cn/digital/20250214/b092c5c0f8484d7b8526478b0bde6981/c.html>
  35. 浪潮信息联合 IDC 发布：《2023-2024 中国人工智能算力发展评估》....<https://www.ieisystem.com/insights-for-the-computing-industry/12078.html>
  36. 行业白皮书\_通信世界网.<http://www.cww.net.cn/subjects/nav/rollList/CBD11F16660A46579F4C2A7D502A39F0>
  37. 信通院发布《人工智能发展报告（2024 年）》\_通信世界网.<https://www.cww.net.cn/article?id=596086>
  38. Untitled.<http://ec100.cn/listcgi.html?f=keyword&k=%C8%CB%B9%A4%D6%C7%C4%DC%20%B1%A8%B8%E6>
  39. 中国信通院发布《人工智能发展报告（2024 年）》-新华网.<http://www.news.cn/info/20241213/ddf4f98d33ce4ef1ae7c9c4c02747d7e/c.html>
  40. 生成式人工智能服务管理暂行办法\_中央网络安全和信息化委员会办公室.[https://www.cac.gov.cn/2023-07/13/c\\_1690898327029107.htm](https://www.cac.gov.cn/2023-07/13/c_1690898327029107.htm)
  41. 我国建立人工智能安全监管制度的必要性及现实路径-中国社会科学院 ....[http://gjs.cssn.cn/kydt/kydt\\_kycg/202501/t20250123\\_5842012.shtml](http://gjs.cssn.cn/kydt/kydt_kycg/202501/t20250123_5842012.shtml)
  42. 商汤“老了”吗？ .[https://finance.sina.com.cn/chanjing/cyxw/2025-07-30/doc-infifvku8380823.shtml?cre=tianyi&mod=pchp&loc=30&r=0&rfunc=11&tj=cxvertical\\_pc\\_hp&tr=12](https://finance.sina.com.cn/chanjing/cyxw/2025-07-30/doc-infifvku8380823.shtml?cre=tianyi&mod=pchp&loc=30&r=0&rfunc=11&tj=cxvertical_pc_hp&tr=12)
  43. 行业分析 | 半导体供应链新兴的韧性- 联晟智达.<https://www.leshines.com/cn/news/detail/1816737640061423617>
  44. 上海市科学技术委员会.<https://stcsm.sh.gov.cn/>
  45. 《Gartner2016 年度新兴技术成熟度曲线》全解读\_gartner 2016 ....<https://blog.csdn.net/xmuecor/article/details/52740407>
  46. Gartner 文件和对象存储魔力象限大改，多家企业出局-DOIT-数据产业 ....<https://www.doit.com.cn/p/521301.html>
-

- 
47. 北京微步在线科技有限公司 2026 年校园招聘.<https://job.xidian.edu.cn/campus/view/id/752105>
  48. [原创]领跑三大安全前沿! 派拉软件入选 Gartner 《2025 中国网络安全 ...<https://bbs.kanxue.com/thread-287700.htm>
  49. Gartner: 2024 年全球半导体收入增长 21% 英伟达首次跃居首位 ...<https://www.c114.com.cn/news/51/a1288155.html>
  50. 我国 AI 训练数据生产流通的制约因素与应对策略研究.<http://bulletin.cas.cn/doi/10.16418/j.issn.1000-3045.20241204003>
  51. IDC: 2024 年中国 IT 安全软件市场同比增长 1.8% - 安全内参| 决策者的 ...<https://www.secrss.com/articles/78657>
  52. 美国法律框架下的中国 AI 企业出海合规指南.<https://www.myhrtr.com/Content/2025/03-12/1017344131.html>
  53. 生成式人工智能法律风险全景与合规指引- 专业文章- 上海市锦天城 ...<https://www.allbrightlaw.com/CN/10475/8c0919de1540d830.aspx>
  54. 金融壹账通连续六年入选“IDC 中国新兴金融科技 50”: 以 AI 与大数据践 ...<http://cn.chinadaily.com.cn/a/202508/26/WS68ad7d57a310f072577450fc.html>
  55. 中国银行网站\_全球门户首页.<https://www.boc.cn/>
  56. 中国自动驾驶行业发展深度分析与投资前景预测报告 (2025-2032 年) .<https://m.chinabaogao.com/detail/743019.html>
  57. 商汤进入 2.0 时代: “日日新”大模型驱动生成式 AI 业务收入率先突破 10 亿.<https://www.nbd.com.cn/articles/2024-03-27/3299217.html>
  58. 创新驱动中国资产重估三大维度看背后逻辑.<https://www.stcn.com/article/detail/1534006.html>
  59. 十大产业前瞻 2025 新质生产力引领千行百业新征程-新华网.<http://www.news.cn/finance/20250102/7fa77c1b9de84228a3d2e3bb6c6c8a1d/c.html>

- 
60. 前瞻 | 理想 2024Q4 营收有望创新高, 但增速将首次降至个位数 ....<https://nev.ofweek.com/2025-02/ART-71000-8500-30657943.html>
  61. IDC: 中国人工智能及自动化市场十大预测| 互联网数据资讯网-199IT ....<http://www.199it.com/archives/1388642.html>
  62. 金融壹账通连续六年入选“IDC 中国新兴金融科技 50”: 以 AI 与大数据实践 ....[http://www.news.cn/digital/20250826/26f13604fd854a918f7b541d3b69e856/c.html?share\\_device\\_token=1bf590f0198f9326b130ab93d58a0668&share\\_time=1756206524487&share\\_type=6](http://www.news.cn/digital/20250826/26f13604fd854a918f7b541d3b69e856/c.html?share_device_token=1bf590f0198f9326b130ab93d58a0668&share_time=1756206524487&share_type=6)
  63. 通用算力相对过剩智能算力相对短缺中国算力市场的成长烦恼-新华网.<http://www.news.cn/finance/20250429/3df0c33317d2499ab3a297a413e0acce/c.html>
  64. 走进 AI 新时代, 讯飞星火能否为梦想腾飞? - 知乎.<https://zhuanlan.zhihu.com/p/11606362144>
  65. 商汤-W(HK0020) 公司资料\_F10\_同花顺金融服务网.<http://basic.10jqka.com.cn/HK0020/company.html>
  66. 香港通讯国际控股(HK0248) AH 股对比\_F10\_同花顺金融服务网.<https://stockpage.10jqka.com.cn/basicweb/176/HK0248/ahcontrast.html>
  67. 2024 年中国宠物行业研究报告- OFweek 医疗科技网.<https://m.ofweek.com/medical/2024-01/ART-11106-8500-30623579.html>
  68. 慧博投研资讯-专业的投资研究报告大数据平台-免费的研报分享平台 ....<https://www.hibor.com.cn/>
  69. 信通院发布《数据智能白皮书》: 数据成为生产要素后价值更受关注.<https://m.bjnews.com.cn/detail/1718859110168496.html>
  70. AI 公司云知声冲刺港股 IPO, 估值约 90 亿元- OFweek 人工智能网.<https://m.ofweek.com/ai/2025-04/ART-201712-8420-30660438.html>
  71. Revenue Transformation | Oracle 中国.<https://www.oracle.com/cn/cx/sales/revenue-operations/>

- 
72. 商汤版大模型发布通用人工智能要来了? \_中国经济网——国家经济门户.[http://www.ce.cn/cysc/tech/gd2012/202304/11/t20230411\\_38490933.shtml](http://www.ce.cn/cysc/tech/gd2012/202304/11/t20230411_38490933.shtml)
  73. 云从科技迎大考: 低毛利、高研发、同质化严重\_手机新浪网.[https://finance.sina.cn/tech/csj/2023-01-30/detail-imycxshw7057371.d.html?oid=3833735680465280&vt=4&wm=4007&cid=79649&node\\_id=79649](https://finance.sina.cn/tech/csj/2023-01-30/detail-imycxshw7057371.d.html?oid=3833735680465280&vt=4&wm=4007&cid=79649&node_id=79649)
  74. 国产图像传感器三强, 谁在掉队? - Supplyframe 四维.<https://cn.supplyframe.com/article/8921.html>
  75. 云从科技 2023 年泛 AI 业务增长超 20 倍毛利率大幅提升.<https://www.stcn.com/article/detail/1179815.html>
  76. 商汤 3000 亿市值, 缩水剩零头, 技术成空谈\_手机新浪网.<https://finance.sina.cn/2025-07-09/detail-infewqmi4649253.d.html?from=wap>
  77. 上海复星医药(集团)股份有限公司 2024 年年度报告.<https://www.fosunpharma.com/Upload/File/202503/dfc805ffefd4441a8fb5bfe0be175b84.pdf>
  78. 数据库行业深度: 商业模式及发展趋势分析、竞争格局及相关公司 ....<https://zhuanlan.zhihu.com/p/608693217>
  79. 中国信通院报告: 2027 年中国数据库市场规模预计突破 800 亿元.<https://www.stcn.com/article/detail/2627312.html>
  80. 商汤科技回应裁员赔偿 N+2: 整体优化商业结构.[https://m.thepaper.cn/newsDetail\\_forward\\_24394249?from=sohu](https://m.thepaper.cn/newsDetail_forward_24394249?from=sohu)
  81. 昆仑技术首度亮相华为合作伙伴大会, 获评“计算优秀整机合作伙伴” ....<https://www.doit.com.cn/p/509757.html>
  82. 依图科技亮相华为生态大会 2025, 共绘全场景数智化新蓝图- 科技 ....<https://aliwangwang.com/?id=18933>
  83. 商汤科技将发布“日日新 6.5”, 将同步推出具身智能平台.<https://finance.sina.com.cn/tech/it/2025-07-25/doc-infhsrzr1788488.shtml>

- 
84. 商汤科技具身智能平台即将发布, 推动 AI 与物理世界深度链接\_白马 ....<https://www.jvniubi.com/hangye/7953.html>
  85. 腾讯云提出“百千万”生态目标, 助力合作伙伴高质量增长-新华网.<http://www.news.cn/tech/20240909/15f2afdb108c4f2584c4ba44020e1c11/c.html>
  86. 产业排名— 智能之家.<http://www.okzhineng.com/?cat=1873>
  87. 软件开发公司如何为 AI 转型铺平道路.<https://partner.microsoft.com/zh-cn/blog/article/generative-ai-impact-for-partners>
  88. 中信集团举办“人工智能+”行动发布会, 聚生态之力共谋智能未来- 新闻 ....[https://www.group.citic/html/2024/News\\_0705/2717.html](https://www.group.citic/html/2024/News_0705/2717.html)
  89. 没有盈利怎么估值? 浅析科创板公司适用估值方法.<https://wallstreetcn.com/articles/3500585>
  90. 2024 年大模型行业研究报告- 21 经济网.<https://www.21jingji.com/article/20240516/herald/c7c069827f1f79b182604827b494511b.html>
  91. 金融人工智能研究报告.<http://www.caict.ac.cn/kxyj/qwfb/ztbg/202201/P020220118401482734472.pdf>
  92. 穿越周期的算力“硬通货” | 解码数据中心投资 | CBRE 中国.<https://www.cbre.com.cn/insights/viewpoints/%E7%A9%BF%E8%B6%8A%E5%91%A8%E6%9C%9F%E7%9A%84%E7%AE%97%E5%8A%9B-%E7%A1%AC%E9%80%9A%E8%B4%A7-%E8%A7%A3%E7%A0%81%E6%95%B0%E6%8D%AE%E4%B8%AD%E5%BF%83%E6%8A%95%E8%B5%84>
  93. 商汤汇丰六四牛 A.<https://gu.qq.com/hk61633/qz/cfg>
  94. 商汤-W 1.970 0.050(+2.60%).<https://gu.qq.com/hk00020/gp/dividends>
  95. 商汤-W 1.970 0.050(+2.60%)\_财经频道\_腾讯网.<https://gu.qq.com/hk00020/gp/cashflow>
  96. 商汤-W 1.970 -0.020(-1.01%)\_财经频道\_腾讯网.<https://gu.qq.com/hk00020/gp/base>
-

- 
97. 商汤-W 1.990 0.020(+1.02%)\_财经频道\_腾讯网.<https://gu.qq.com/hk00020/gp/wolun>
98. 商汤-W 2.260 0.150(+7.11%)\_财经频道\_腾讯网.<https://gu.qq.com/hk00020/gp/zjc>
99. 股票 00020 现金流量表数据 (同花顺-财务平台).  
<https://basic.10jqka.com.cn/new/00020/finance.html>.
- 100.“CV 四小龙”的老问题和新挑战.<https://finance.sina.com.cn/jjxw/2025-02-09/doc-ineixfvu4897365.shtml>
- 101.中国电子科技集团有限公司公开发行公司债券 2024 年跟踪评级报告.<https://www.lhratings.com/reports/B0722-P49253-2020-GZ2024.pdf>
- 102.英伟达(NVDA) 存货 | 价值大师- 像大师一样投资.<https://www.gurufocus.cn/stock/NVDA/term/inventory>
- 103.上市公司财务数据(2025 年最新) - 知乎.<https://zhuanlan.zhihu.com/p/1922682549358010843>
- 104.亚马逊盘后重挫 7%，指引疲软，云业务增长不及微软谷歌、利润率 ....<https://wallstreetcn.com/articles/3752392>
- 105.中国上市公司 2023 年发展统计报告.pdf.<https://capcofile.oss-cn-beijing.aliyuncs.com/2024/file/GwFj/%E4%B8%AD%E5%9B%BD%E4%B8%8A%E5%B8%82%E5%85%AC%E5%8F%B82023%E5%B9%B4%E5%8F%91%E5%B1%95%E7%BB%9F%E8%AE%A1%E6%8A%A5%E5%91%8A.pdf>
- 106.云从科技上半年营业收入 1.69 亿元，同比增 40.2%\_财经头条.<https://cj.sina.cn/articles/view/7935425109/1d8fcfa5502001aub0>
- 107.综合来源：东方财富网-商汤科技财务数据(2024 年报)、港股行情数据(2025 年 9 月)、公司股东结构数据。数据时间：2024 年 12 月-2025 年 9 月
- 108.煤炭企业绩效评价体系与方法研究.<http://www.chinaminingmagazine.com/cn/article/pdf/preview/10.12075/j.issn.1004-4051.20242483.pdf>
-



- 
109. 欧阳辉——AI 热潮与互联网泡沫：跨越 25 年的对比与启示.<https://www.ckgsb.edu.cn/faculty/article/detail/157/8469.html>
110. 江苏神通(002438)\_股票价格\_行情\_走势图—东方财富网.[http://quote.eastmoney.com/unify/r/0.002438?jump\\_to\\_web=true](http://quote.eastmoney.com/unify/r/0.002438?jump_to_web=true)
111. 商汤-W(hk00020)股吧\_商汤-W 怎么样\_分析讨论社区—东方财富网.<https://guba.eastmoney.com/list,hk00020.html>
112. 商汤概念(bk0942)股吧\_商汤概念怎么样\_分析讨论社区—东方财富网.<https://guba.eastmoney.com/list,bk0942.html>
113. 证券交易所-股票相关金融信息.
114. 综合多个权威市场研究机构 2024 年最新报告
115. 2024 年中国消费电子行业研究报告- 21 经济网.<http://www.21jingji.com/article/20240604/herald/0355038c779d8fe205bb9e79196d74c2.html>
116. 什么是运营效率? | IBM.<https://www.ibm.com/cn-zh/topics/operational-efficiency>
117. 九号有限公司 2024 年可持续发展报告.[https://ninebot.com/content/dam/segway-ninebot/cn/zh\\_cn/explore/esg/%E4%B9%9D%E5%8F%B7%E6%9C%89%E9%99%90%E5%85%AC%E5%8F%B82024%E5%B9%B4%E5%8F%AF%E6%8C%81%E7%BB%AD%E5%8F%91%E5%B1%95%E6%8A%A5%E5%91%8A.pdf](https://ninebot.com/content/dam/segway-ninebot/cn/zh_cn/explore/esg/%E4%B9%9D%E5%8F%B7%E6%9C%89%E9%99%90%E5%85%AC%E5%8F%B82024%E5%B9%B4%E5%8F%AF%E6%8C%81%E7%BB%AD%E5%8F%91%E5%B1%95%E6%8A%A5%E5%91%8A.pdf)
118. 麦肯锡- 电子工程专辑.<https://www.eet-china.com/mp/tags/85138>
119. 国际知名数据机构 IDC：百度 AI 搜索是中国最好的通用 AI 搜索-品玩.<https://www.pingwest.com/a/306391>
120. 集团信用质量决定企业集团财务公司的信用质量.[https://www.spgchinaratings.cn/research/pdf/20250210\\_commentary\\_captive-finance-company\\_cn.pdf](https://www.spgchinaratings.cn/research/pdf/20250210_commentary_captive-finance-company_cn.pdf)
121. 京东集团-SW(9618)股票最新价格行情,实时走势图,股价分析预测\_英 ....<https://cn.investing.com/equities/jd-com-inc>
-



- 
122. 英伟达产业链深度：发展历程、产业布局、营收分析及相关公司深度 ....<https://www.hangxincap.com/wp-content/uploads/2023/06/20230609-%E9%AB%98%E7%AB%AF%E5%88%B6%E9%80%A0-%E8%8B%B1%E4%BC%9F%E8%BE%BE%E4%BA%A7%E4%B8%9A%E9%93%BE%E6%B7%B1%E5%BA%A6%EF%BC%9A%E5%8F%91%E5%B1%95%E5%8E%86%E7%A8%8B%E3%80%81%E4%BA%A7%E4%B8%9A%E5%B8%83%E5%B1%80%E3%80%81%E8%90%A5%E6%94%B6%E5%88%86%E6%9E%90%E5%8F%8A%E7%9B%B8%E5%85%B3%E5%85%AC%E5%8F%B8%E6%B7%B1%E5%BA%A6%E6%A2%B3%E7%90%86-1.pdf>
123. 商汤集团联合创始人杨帆确认出席 QCon 广州，分享商汤在大模型浪潮 ....<https://www.infoq.cn/article/tycwuepwdedjaotqg8ir>
124. 健适医疗完成数亿元 C 轮融资，特斯联完成 20 亿元 D 轮融资.<http://stcn.com/article/detail/1177000.html>
125. 孙正义，最新出手！.<http://stcn.com/article/detail/1201973.html>
126. 商汤港股上市——起底中国 AI 四小龙进化历程\_最新资讯\_行业资讯\_ ....<http://www.agv-amr.com/news/show.php?itemid=819>
127. 山西证券股份有限公司 2025 年面向专业投资者公开发行科技创新公司 ....[https://www.sxzq.com/plat\\_files/upload/png\\_upload/20250603/202506031748933922426.pdf](https://www.sxzq.com/plat_files/upload/png_upload/20250603/202506031748933922426.pdf)
128. 深圳市卓越商业管理有限公司 2023 年跟踪评级报告.<https://www.lhratings.com/reports/B010215-P43120-2019-GZ2023.pdf>
129. 国务院关于印发新一代人工智能发展规划的通知\_科技\_中国政府网.[https://www.gov.cn/zhengce/content/2017-07/20/content\\_5211996.htm](https://www.gov.cn/zhengce/content/2017-07/20/content_5211996.htm)
130. 商汤日日新.<https://platform.sensenova.cn/>
131. 2024 年金融信息服务行业研究报告- 21 经济网.<https://www.21jingji.com/article/20240827/herald/6530f00096216cefc033a13f5c2fbbff.html>
132. 德必集团：2024 年营收净利润稳健增长轻资产运营模式加快版图扩张.<https://stcn.com/article/detail/1714543.html>
-

---

133.人民币国际化发展概

述.<https://pic.bankofchina.com/bocappd/rareport/202506/P020250606660402815941.pdf>

134.2024 年重大网络安全政策法规盘点- 安全内参| 决策者的网络安全知识

库.<https://www.secrss.com/articles/73704?app=1>

135.3 份问询函，3 年上市路，合合信息成功迈过数据合规上市门槛- 21 经济

网.<https://www.21jingji.com/article/20240927/herald/a02b30dfdc71849ef29104d4d18692a9.html>

136.国家金融监督管理总局关于印发银行保险机构数据安全管理办法的通

知.<https://www.nfra.gov.cn/cn/view/pages/governmentDetail.html?docId=1192311&itemId=861&generaltype=1>

137.中华人民共和国数据安全法-中国法律检索系统-公众版法律法规查

询 ....<https://law.pkulaw.com/chinalaw/5015167.html>

138.人工智能监管前沿：中、美、欧及全球其他地区趋势洞察.<https://www.junhe.com/legal-updates/2624>

139.斯坦福大学发布《2025 年 AI 指数报告》 AI 投资与应用创历史新高

高 ....[https://ecas.cas.cn/xxkw/kbcd/201115\\_147319/ml/xxhjsyjcscs/202504/t20250417\\_5064533.html](https://ecas.cas.cn/xxkw/kbcd/201115_147319/ml/xxhjsyjcscs/202504/t20250417_5064533.html)

140.特朗普政府网信政策的几个重点和趋势研判- 安全内参| 决策者的网

络 ....<https://www.secrss.com/articles/81337>

141.2025 云计算市场规模、主导厂商与未来趋势全解析（33 个关键数

据 ....<https://mofcloud.cn/blog/blog/2025-05-06-2025-cloud-market-size>

142.趋势洞察！IDC、Gartner、Forbes 等权威机构解读 2025 年 AI 发展趋

势 ....<https://blog.csdn.net/CBGCampus/article/details/145187371>

143.《2021 年美国创新与竞争法案》瞄准对华科技竞

争.[http://www.casisd.cn/zkcg/ydkb/kjzcyczxkb/2021/zczxkb\\_202108/202110/P020211009319571471401.pdf](http://www.casisd.cn/zkcg/ydkb/kjzcyczxkb/2021/zczxkb_202108/202110/P020211009319571471401.pdf)

---

144.2023 年度证券资产评估分析报

告.<http://www.csrc.gov.cn/csrc/c100040/c7500705/7500705/files/2023%E5%B9%B4%E5%BA%A6%E8%AF%81%E5%88%B8%E8%B5%84%E4%BA%A7%E8%AF%84%E4%B C%B0%E5%88%86%E6%9E%90%E6%8A%A5%E5%91%8A-20240816152904463.pdf>

145.2025 年半年度报

告.[https://download.cib.com.cn/netbank/download/cn/announcements/20250828\\_1.pdf](https://download.cib.com.cn/netbank/download/cn/announcements/20250828_1.pdf)

146.AI 可信度分析.[https://c-csa.cn/u\\_file/photo/20250710/63591e0036.pdf](https://c-csa.cn/u_file/photo/20250710/63591e0036.pdf)

147.2025 年中国智能算力行业发展现状及未来趋势分析报

告.<https://m.chyxx.com/pdf/09/21/1190921.pdf>

148.2024 年 1—9 月份全国规模以上工业企业利润下降 3.5% - 国家统计

局.[https://www.stats.gov.cn/sj/zxfb/202410/t20241027\\_1957183.html](https://www.stats.gov.cn/sj/zxfb/202410/t20241027_1957183.html)

149.2022 年终盘点之 AI 四小龙：三年巨亏 500 亿流血上市道路崎

岖.<https://www.chnfund.com/article/AR2023010609161359566295>

150.关于成都倍特药业股份有限公司首次公开发行股票并在创业板上市

的 ....<http://www.csrc.gov.cn/csrc/c100091/c1890509/1890509/files/%E5%8F%91%E8%A1%8C%E4%BA%BA%E5%8F%8A%E4%BF%9D%E8%8D%90%E6%9C%BA%E6%9E%84%E5%85%B3%E4%BA%8E%E5%8F%91%E8%A1%8C%E6%B3%A8%E5%86%8C%E7%8E%AF%E8%8A%82%E5%8F%8D%E9%A6%88%E6%84%8F%E8%A7%81%E8%90%BD%E5%AE%9E%E5%87%BD%E7%9A%84%E5%9B%9E%E5%A4%8D.pdf>

151.花旗金融信息

CSTC.[https://www.citigroup.com/china/csts/EducationProgram/AboutEducation\\_CFCcn.html](https://www.citigroup.com/china/csts/EducationProgram/AboutEducation_CFCcn.html)
