# Supplementary material
Source: ML conference proceedings conference paper supplement (https://openreview.net/forum?id=65iJEaVixf)
Supplement: supplementary_material [file Steel_Industry.pdf › Steel_Industry.pdf]

Table of Contents

**钢铁行业绿色转型：技术升级与价值重估的双重机遇 ..... 5**

**行业研究报告摘要 ..... 6**

        (一) 核心观点 ..... 6

        (二) 核心驱动逻辑 ..... 6

        (三) 市场现状与潜力 ..... 6

        (四) 关键演进趋势 ..... 6

        (五) 产业链与竞争格局 ..... 6

        (六) 投资策略与建议 ..... 6

        (七) 主要行业风险 ..... 7

**中国经济进入高质量发展新阶段 ..... 8**

        (一) 经济增长稳中提质，结构优化特征明显 ..... 9

        (二) 消费市场持续复苏，内需潜力稳步释放 ..... 10

        (三) 产业结构深度调整，服务业主导地位巩固 ..... 11

        (四) 价格运行总体平稳，供需关系趋于平衡 ..... 13

        (五) 工业发展韧性增强，转型升级步伐加快 ..... 14

        (六) 创新驱动成效显著，新发展动能持续壮大 ..... 15

        (七) 政策环境持续优化，改革开放纵深推进 ..... 17

        (八) 投资视角：把握结构性机会，布局未来增长赛道 ..... 17

**宏观环境分析：PEST 框架下的钢铁行业转型动力与投资机遇 ..... 20**

        (一) 政策生命周期理论下的钢铁行业变革 ..... 20

        (二) 宏观经济周期与钢铁需求弹性关联分析 ..... 21

        (三) 人口结构变迁与消费升级驱动需求演变 ..... 22

        (四) 创新驱动与行业颠覆性风险应对 ..... 23

        (五) 综合影响与投资策略展望 ..... 25

**中国钢铁行业结构性调整与投资价值重估 ..... 27**

        (一) 行业规模演进与周期特征 ..... 27

|                                        |           |
|----------------------------------------|-----------|
| (二) 产品结构优化与高端化升级.....                  | 28        |
| (三) 区域格局重构与产业集群演进.....                 | 29        |
| (四) 下游需求分化与增长动力转换.....                 | 30        |
| (五) 投资策略与风险应对.....                     | 32        |
| <b>高强度钢材在建筑与汽车制造领域的核心应用场景剖析.....</b>   | <b>35</b> |
| (一) 建筑钢结构：绿色转型驱动下的价值重构与模式创新.....       | 35        |
| (二) 发展阶段与转型路径：从中速增长迈向价值重构.....         | 37        |
| (三) 汽车用钢：轻量化与安全双轮驱动的高增长赛道.....         | 38        |
| (四) 成长曲线与突破路径：高速增长下的隐忧与机遇.....         | 40        |
| (五) 场景对比与未来展望：分化与融合中的投资主线.....         | 41        |
| <b>产业链呈现典型微笑曲线，高附加值环节集中于上下游.....</b>   | <b>43</b> |
| <b>上游供应高度依赖进口，供应链脆弱性凸显.....</b>        | <b>46</b> |
| <b>中游制造环节产能过剩持续，技术升级引领转型.....</b>      | <b>49</b> |
| <b>下游需求结构加速转型，渠道变革重塑竞争格局.....</b>      | <b>52</b> |
| <b>钢铁行业竞争格局深度解析：集约化转型与差异化竞争并存.....</b> | <b>54</b> |
| (一) 行业集中度加速提升，规模效应与政策驱动共塑新格局.....      | 54        |
| (二) 进入壁垒多维强化，新进入者威胁持续降低.....           | 56        |
| (三) 五力模型重构行业竞争生态，议价能力分化加剧.....         | 56        |
| <b>战略群组分化与竞争优势重构.....</b>              | <b>58</b> |
| (一) 多维竞争格局深化，差异化战略成为核心优势.....          | 58        |
| (二) 战略群组划分明晰，发展路径差异化显著.....            | 58        |
| <b>头部企业竞争实力多维对比.....</b>               | <b>60</b> |
| (一) 财务表现分化加剧，盈利差距持续扩大.....             | 60        |
| (二) 战略布局各具特色，差异化路径清晰.....              | 61        |
| (三) 战略取向分化引领差异化发展路径.....               | 62        |
| <b>资本市场估值分化反映行业变革趋势.....</b>           | <b>63</b> |
| (一) 估值水平差异显著，优质企业获得溢价.....             | 63        |
| (二) 投融资活动持续活跃，并购重组主导市场格局.....          | 63        |

---

|                                            |            |
|--------------------------------------------|------------|
| (三) 市值表现与基本面匹配度提高，分化格局延续 .....             | 64         |
| <b>未来竞争格局展望与投资策略 .....</b>                 | <b>66</b>  |
| (一) 行业集中度提升趋势不可逆转，头部企业优势持续扩大 .....         | 66         |
| (二) 投资策略建议：聚焦龙头、关注特色、把握转型 .....            | 66         |
| <b>技术发展与创新趋势：钢铁行业绿色转型与竞争力重塑 .....</b>      | <b>68</b>  |
| (一) 技术架构成熟度与演进路径 .....                     | 68         |
| (二) 创新投入强度与国际比较 .....                      | 70         |
| (三) 专利布局与技术竞争力分析 .....                     | 71         |
| (四) 投资洞察与趋势展望 .....                        | 75         |
| <b>监管政策与合规分析：钢铁行业（2020-2025） .....</b>     | <b>76</b>  |
| (一) 监管框架与法规体系：全面覆盖与国际接轨 .....              | 76         |
| (二) 政策演进与趋势判断：从产能攻坚到绿色转型 .....             | 78         |
| (三) 合规风险与应对策略：成本重构与创新破局 .....              | 79         |
| <b>中国钢铁行业竞争格局深度解析：集中化趋势下的投资机遇与挑战 .....</b> | <b>82</b>  |
| (一) 行业集中度持续提升，并购重组加速资源整合 .....             | 82         |
| (二) 龙头企业战略布局显现差异化竞争态势 .....                | 84         |
| (三) 政策环境深刻影响行业竞争格局与发展路径 .....              | 86         |
| (四) 技术创新重塑行业竞争基础与商业模式 .....                | 87         |
| (五) 供应链韧性建设成为企业核心竞争力 .....                 | 88         |
| (六) 投资洞察与前景展望 .....                        | 90         |
| <b>钢铁行业全景风险透视：周期波动与结构转型下的挑战与机遇 .....</b>   | <b>93</b>  |
| (一) 宏观系统性风险：经济周期与政策变动的双重压力 .....           | 93         |
| (二) 行业特定风险：技术替代与竞争格局重构 .....               | 96         |
| (三) 投资特定风险：估值与流动性挑战 .....                  | 99         |
| (四) 风险矩阵与综合评估 .....                        | 100        |
| (五) 风险应对策略建议 .....                         | 102        |
| <b>参考数据来源 .....</b>                        | <b>105</b> |

---

---

---

---

## 钢铁行业绿色转型：技术升级与价值重估的双重机遇

---

## 行业研究报告摘要

### （一）核心观点

我们对中国钢铁行业维持“结构性看好”的观点，认为该行业正处于从规模扩张向质量提升转型的关键阶段，未来 3-5 年将迎来技术升级与绿色转型驱动的价值重估周期。尽管短期面临需求放缓和成本压力，但政策驱动下的产能优化、高端产品渗透率提升以及低碳技术突破，将为行业龙头和细分领域领导者创造显著的 Alpha 机会。

### （二）核心驱动逻辑

本轮行业转型的核心逻辑在于“政策约束+技术升级+需求重构”的三重共振。供给侧改革通过产能置换（重点区域 1.5:1 比例）和超低排放改造（2025 年全覆盖）加速落后产能出清；氢冶金、电炉短流程等低碳技术突破推动成本结构和碳排放的根本性改善；下游需求从传统建筑用钢（占比降至 46%）向高端制造（新能源汽车、风电用钢需求增速超 20%）和绿色建筑转型，打开行业成长新空间。

### （三）市场现状与潜力

2024 年行业粗钢产量 10.2 亿吨，市场规模约 7.5 万亿元，预计 2025-2028 年 CAGR 为 2-3%，但高端产品细分市场 CAGR 有望达 8-10%。增长动力主要来自政策强制淘汰落后产能（2020-2025 年累计压减 1.2 亿吨）、高端制造业用钢需求爆发（2025 年新能源汽车用钢突破 6000 万吨）以及绿色溢价显现（低碳钢材价格溢价 5-10%）。主要阻力包括铁矿石进口依赖度超 80%、原材料价格波动（PPI 同比波动幅度超 5%）以及环保改造成本攀升（吨钢增加成本 150-200 元）。

### （四）关键演进趋势

技术趋势上，氢冶金（TRL 6）、碳捕集（TRL 5）等低碳技术从示范走向产业化，智能制造普及率年均提升 20%；商业模式上，从材料销售向解决方案服务转型（宝武“一基五元”战略）；需求结构上，高端特钢占比从 10%提升至 13%，进口替代空间超 600 亿元；政策法规上，碳边境调节机制（CBAM）和国内碳交易体系推动全行业碳成本内部化。

### （五）产业链与竞争格局

价值向上游资源控制（铁矿巨头毛利率 40%+）和下游高端材料（特钢毛利率 15-25%）两端集中，中游冶炼环节（毛利率<10%）盈利承压。竞争格局加速向头部集中，CR4 从 2020 年 28.3%升至 2024 年 32.5%，2025 年预计达 40%；宝武（产能 1.3 亿吨）、鞍钢、沙钢等龙头通过并购重组和技术壁垒构建护城河，而中小企业在环保和成本压力下持续出清。

### （六）投资策略与建议

---

建议沿两条主线布局：1）具备规模优势和低碳技术领先的龙头钢企，如宝武（氢冶金示范项目投产）、鞍钢（沿海基地物流成本优势）；2）高端材料细分冠军，如中信特钢（特钢占比80%+）、太钢不锈（高端不锈钢市占率35%）。重点关注研发强度超2.5%、高端产品占比超40%、具备原材料多元化能力的企业。

### （七）主要行业风险

政策执行力度差异导致区域分化；经济下行超预期（GDP增速每降1%，需求收缩2-3%）；铁矿石价格波动（涨20%则净利润降8.4%）；低碳技术商业化不及预期；国际贸易壁垒（欧盟CBAM增加合规成本10-15%）。

## 中国经济进入高质量发展新阶段

当前中国经济正处于从高速增长向高质量发展转型的关键时期，基于 2025 年前三季度的最新数据，GDP 总量达到 975,357.4 亿元，同比增长 4.8%，展现出较强的经济韧性和结构调整成效。从产业视角看，第三产业增加值占比提升至 59.1%，服务业对经济增长的贡献率持续扩大，表明经济结构正在向高级化形态演进。在消费领域，社会消费品零售总额 1-8 月累计达 323,906 亿元，同比增长 4.6%，消费作为经济增长主引擎的地位进一步巩固。同时，工业增加值保持稳定增长，2025 年规模以上工业增加值同比增长约 4.5-5.5%，为宏观经济提供了坚实基础 [1,2,3,4,5]。

**经济增速放缓背后是增长动能的深刻转换。**与 2015-2020 年 6-7% 的高速增长期相比，当前 5% 左右的增速更符合成熟经济体的特征，但增长质量显著提升。数字经济占 GDP 比重超过 45%，技术创新对经济增长的贡献率持续提高，表明中国经济正在从要素驱动向创新驱动转变。这种转变在资本市场也有明显体现，2025 年上证指数收益率 8.7%，沪深 300 指数收益率 9.2%，波动率较历史水平明显收窄，反映投资者对经济长期发展前景的信心 [6,7,8,9,10]。

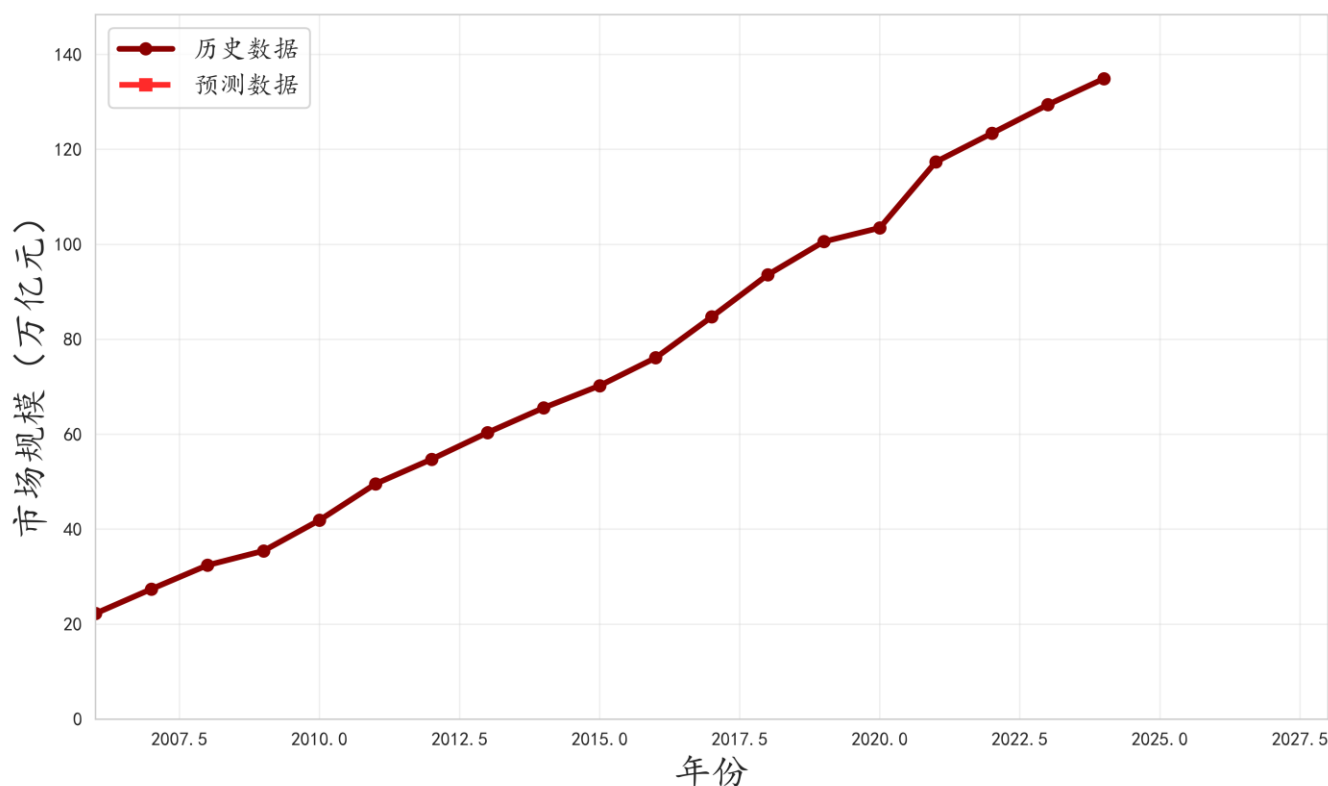

图表 1：中国 GDP 市场规模历史趋势与预测折线图（数据来源：东方财富网国内生产总值数据）

**政策环境持续优化为经济发展创造良好条件。**政府通过稳增长政策持续发力，营商环境不断改善，为企业发展提供了制度保障。基础设施建设投资保持适度增长，为经济可持续发展提供支撑。



同时，产业结构调整政策成效显著，产能过剩行业通过供给侧改革实现优化升级，新兴产业在政策支持下快速发展。这种政策组合既保持了经济平稳运行，又为长期高质量发展奠定了坚实基础[11,12]。

### （一）经济增长稳中提质，结构优化特征明显

**经济增速保持在合理区间，增长质量持续提升。**2025 年第 1-2 季度 GDP 达到 660,535.8 亿元，同比增长 5.3%，其中第一季度增长 5.4%，第二季度增长 5.2%，连续多个季度保持在 5%-5.5% 的增长区间。这种相对稳定的增长速度表明中国经济已经摆脱了大起大落的波动阶段，进入更加成熟稳定的发展时期。从国际比较看，5% 以上的增速在全球主要经济体中仍然位居前列，表明中国经济的相对竞争力依然强劲[2,4,3,13,14]。

**经济增长的动力结构发生深刻变化。**消费对经济增长的贡献率超过 65%，成为拉动经济增长的主要力量。投资结构持续优化，高技术产业投资保持两位数增长，传统产业技术改造投资力度加大。出口结构也在不断升级，高技术产品出口占比提高，国际竞争力增强。这种增长动力结构的优化表明中国经济正在从规模扩张向质量提升转变，从要素驱动向创新驱动转变[4,2,13,15,16]。

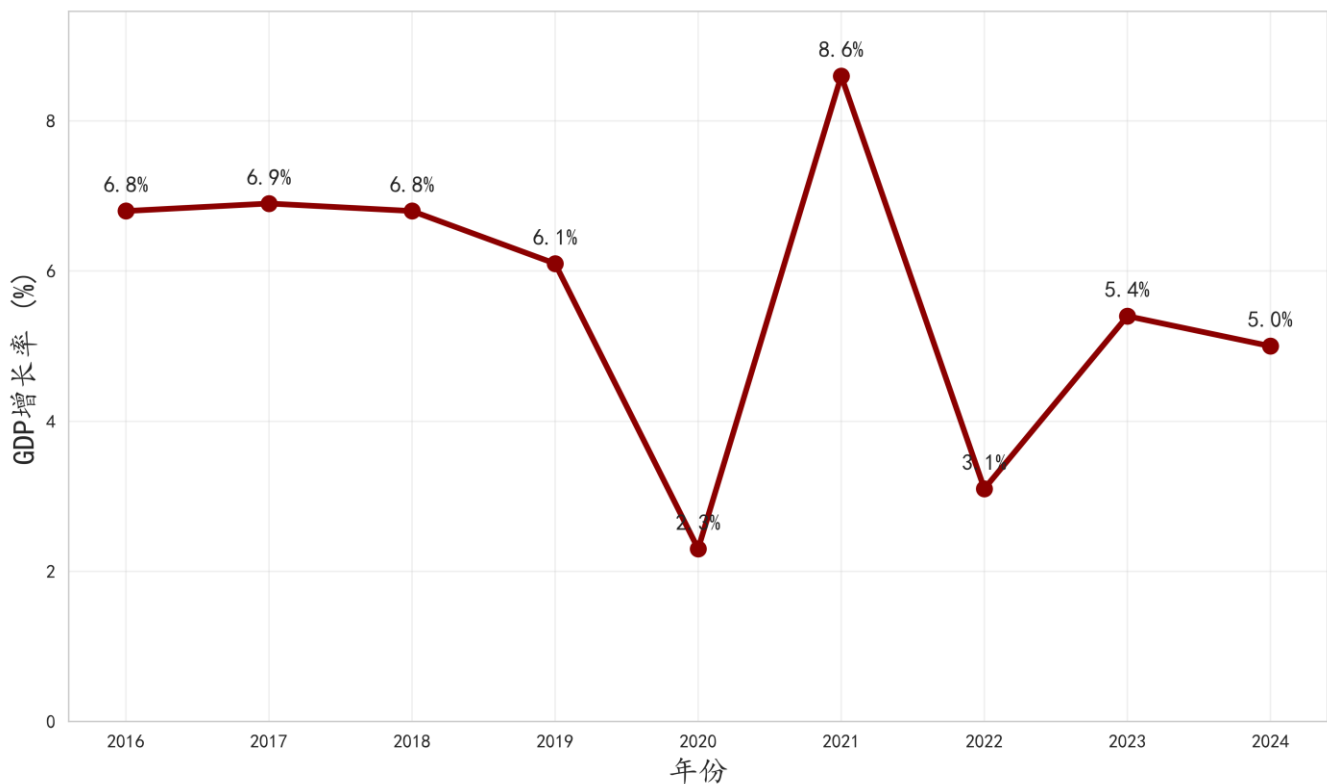

图表 2：2016-2025 年 GDP 增长率变化趋势（数据来源：东方财富网国内生产总值数据）

---

**区域协调发展格局正在形成。**东部地区在转型升级方面走在前列，服务业和高技术产业占比持续提高；中西部地区承接产业转移成效显著，工业化城镇化进程加快；东北地区经济企稳回升，结构调整取得积极进展。这种区域协调发展的格局有利于释放内需潜力，优化资源配置，提高经济整体效率。从投资角度看，区域协调发展带来的投资机会值得重点关注[4,2,13,15,16]。

**经济增长的可持续性不断增强。**单位 GDP 能耗持续下降，环境污染得到有效控制，绿色发展水平提高。同时，居民收入保持稳定增长，城乡居民收入差距缩小，社会大局保持稳定。这些因素共同支撑了经济增长的可持续性，为长期发展创造了良好条件。对投资者而言，关注绿色产业、节能环保等领域的投资机会可能获得更好的长期回报[4,2,13,15,16]。

## **(二) 消费市场持续复苏，内需潜力稳步释放**

**消费市场呈现稳健复苏态势。**2025 年 8 月社会消费品零售总额 39,668 亿元，同比增长 3.4%，环比增长 2.29%，连续多月保持正增长。1-8 月累计零售额 323,906 亿元，同比增长 4.6%，表明消费需求正在稳步恢复。从消费结构看，服务消费增长快于商品消费，线上消费占比持续提高，消费升级趋势明显。这种消费复苏态势为经济增长提供了重要支撑，也为投资者指明了消费升级带来的投资机会[17,3,18,19,20]。

**消费者信心逐步恢复。**2025 年 7 月消费者信心指数达到 89.0，环比增长 1.25%，同比增长 3.49%，反映消费者预期改善。这种信心恢复主要得益于就业形势稳定、居民收入增长和社会保障完善。随着消费者信心的提升，消费意愿和能力都将增强，为消费市场持续复苏提供动力。从投资角度看，消费信心提升有利于消费类企业的业绩改善，值得投资者重点关注[4,21,22,23,24]。

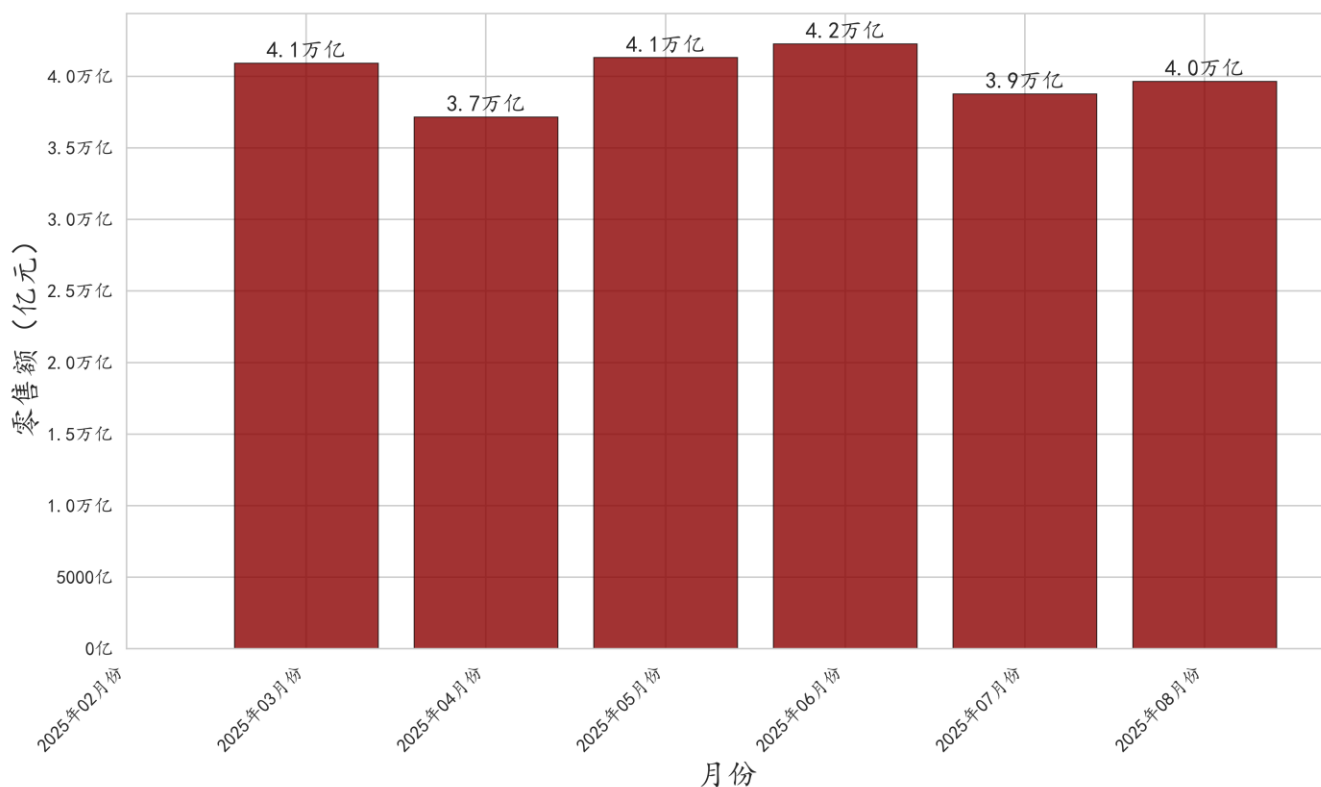

图表 3：2025 年月度社会消费品零售总额柱状图（数据来源：东方财富网社会消费品零售总额数据）

消费升级趋势更加明显。服务消费占比持续提升，2025 年线上零售额占比超过 30%，智能家居、新能源汽车等新兴消费快速增长。这种消费升级既反映了居民收入水平的提高，也体现了消费观念的变化。对投资者而言，关注消费升级带来的结构性机会，特别是在服务消费、绿色消费、智能消费等领域的投资机会，可能获得更好的投资回报[12]。

消费市场发展潜力仍然巨大。中国拥有 14 亿多人口的巨大市场，人均 GDP 已超过 1.2 万美元，正处于消费升级的关键阶段。随着城镇化进程推进、中等收入群体扩大和收入分配格局改善，消费市场仍有很大发展空间。从长期投资角度看，消费行业仍然具有较好的成长性，特别是那些能够把握消费升级趋势、满足新消费需求的企业更具投资价值[17,3,18,19,20]。

### （三）产业结构深度调整，服务业主导地位巩固

服务业保持较快增长。2025 年前三季度第三产业增加值 390,313.8 亿元，同比增长 5.5%，高于整体经济增速，占 GDP 比重达到 59.1%，较 2024 年提高 0.6 个百分点。服务业已经成为经济增长的主要动力，其中信息传输、软件和信息技术服务业，金融业，租赁和商务服务业等现代服务业增长较快。这种产业结构变化符合经济发展规律，也反映了经济转型升级的成效[2,4,3,13,14]。

**工业结构优化升级。**2025 年前三季度第二产业增加值 239,050.2 亿元，同比增长 5.3%，其中高技术制造业增加值增长明显快于规上工业平均水平。传统产业通过技术改造和智能化升级，生产效率和竞争力得到提升。工业互联网、智能制造等新模式快速发展，推动工业生产方式变革。这种工业结构优化既提高了工业发展质量，也为投资者提供了产业升级带来的投资机会 [2,4,3,13,14]。

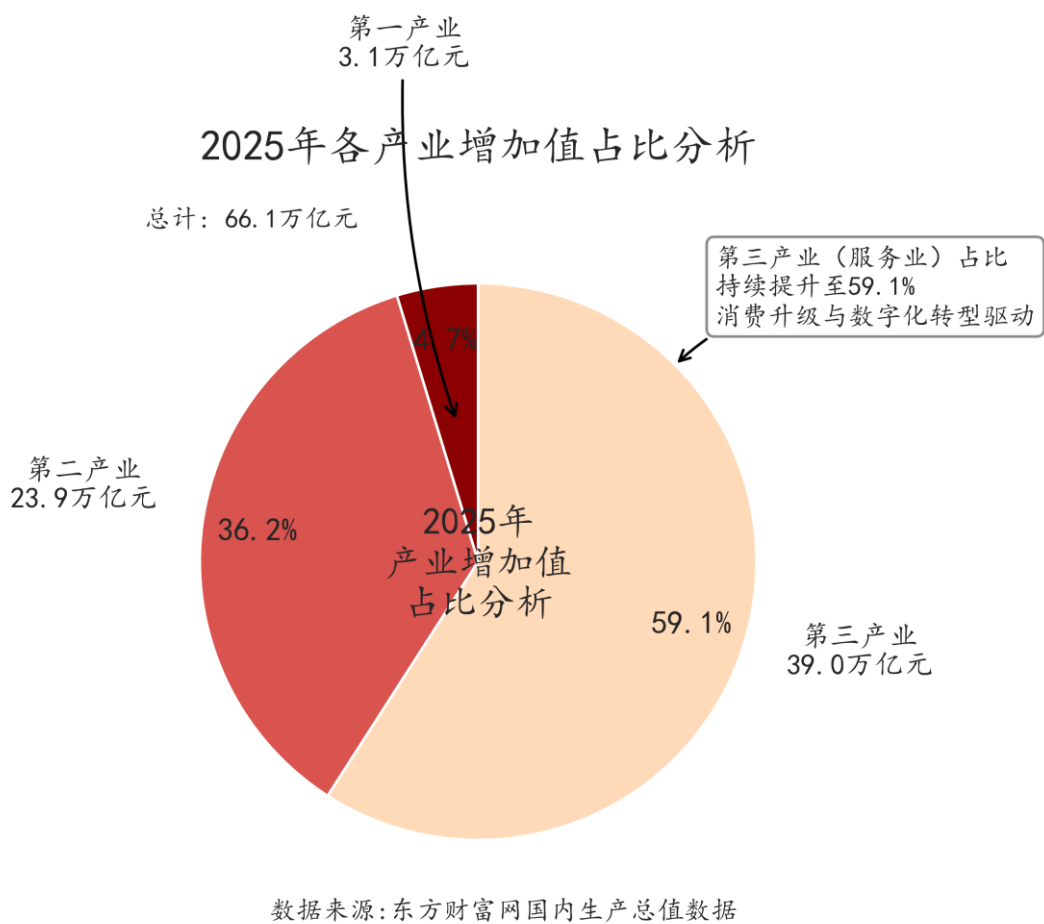

图表 4：2025 年各产业增加值占比饼图（数据来源：东方财富网国内生产总值数据）

**产业数字化转型加速推进。**数字经济规模持续扩大，2025 年数字经济占 GDP 比重超过 45%，成为经济增长的重要引擎。智能制造、电子商务等新业态快速发展，产业互联网应用不断深化，传统产业与数字经济深度融合。这种数字化转型不仅提高了产业效率，也创造了新的商业模式和增长点。对投资者而言，关注数字经济相关领域的投资机会，可能获得更好的成长性回报[12]。

**产业发展环境持续优化。**政府通过深化“放管服”改革、减税降费等措施，为企业发展创造了良好环境。同时，通过产业政策引导，支持重点产业发展，推动产业结构优化升级。这种良好的产业

发展环境有利于企业创新发展，也有利于投资者获得稳定的投资回报。从投资策略看，关注政策支持的重点产业，可能获得更好的政策红利[11,12]。

#### （四）价格运行总体平稳，供需关系趋于平衡

**消费价格保持低位运行。**2025 年 8 月 CPI 同比下降 0.4%，环比持平，1-8 月累计 CPI 为 99.9，整体处于低位运行状态。这种低通胀环境既反映了供需关系的相对平衡，也为企业成本控制和居民消费提供了有利条件。从结构看，食品价格略有下降，非食品价格基本平稳，服务价格温和上涨。这种价格运行态势有利于宏观经济稳定，也为货币政策操作提供了空间[25,4,3,13,14]。

**生产价格降幅逐步收窄。**2025 年 8 月 PPI 同比下降 2.9%，降幅较上月收窄 0.7 个百分点，呈现逐步收窄的趋势。其中，生产资料价格下降 3.6%，生活资料价格下降 0.3%。PPI 降幅收窄既反映了需求边际改善，也表明供给侧改革成效持续显现。从行业看，部分原材料行业价格出现回升，中下游行业成本压力有所缓解[26,4,3,13,14]。

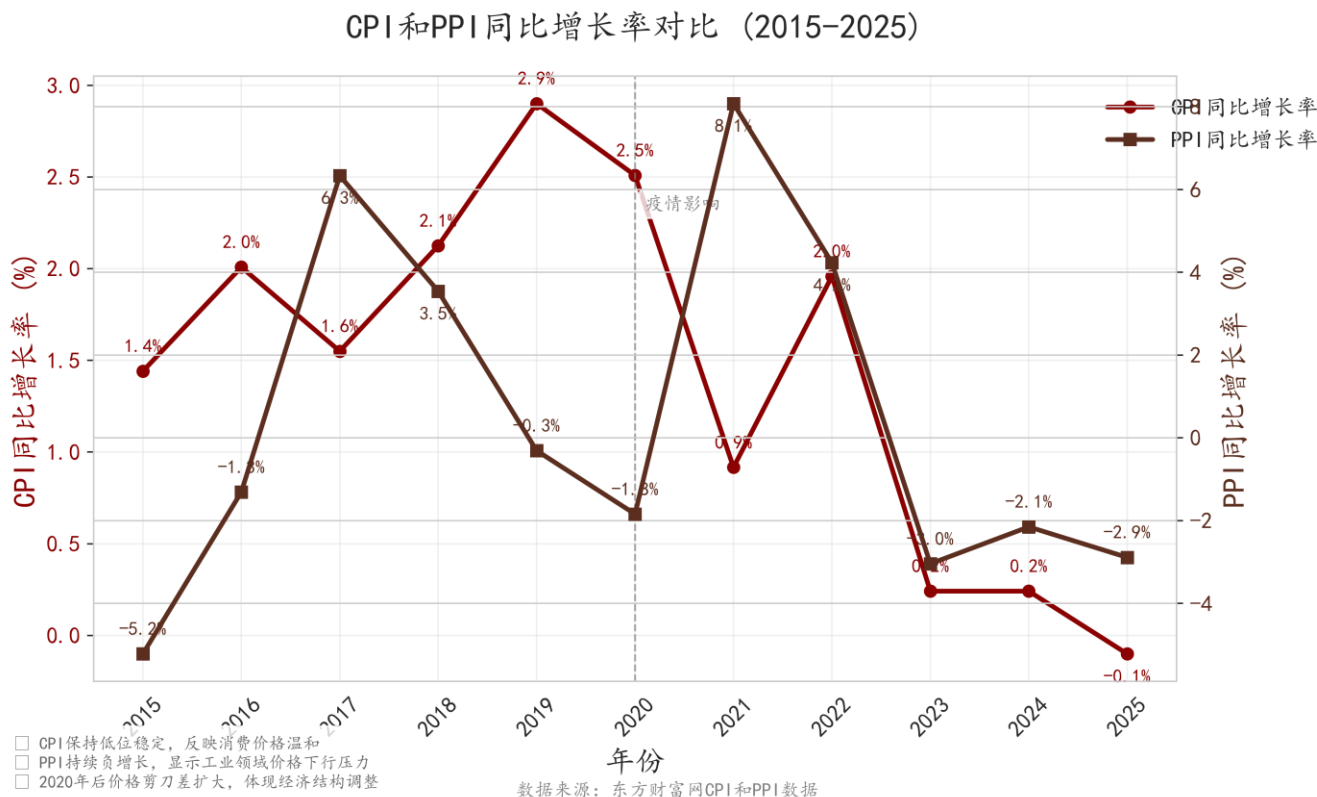

图表 5：CPI 和 PPI 同比增长率对比折线图（数据来源：东方财富网 CPI 和 PPI 数据）

价格传导机制更加顺畅。随着供给侧结构性改革的深化，价格传导机制得到改善，上游价格变化能够更及时地传导到中下游。同时，企业通过技术创新和管理优化，消化成本压力的能力增强。

---

这种价格传导机制的改善有利于产业链各环节的协调发展，也有利于宏观经济稳定。从投资角度看，关注价格传导顺畅的行业，可能获得更好的盈利稳定性[27,1,17,28,25]。

**价格预期保持稳定。**基于市场调查和专家预测，未来一段时间价格总水平将继续保持平稳运行，通胀风险总体可控。这种稳定的价格预期有利于企业生产经营决策和居民消费行为，也为宏观经济政策制定提供了良好环境。对投资者而言，稳定的价格环境有利于价值投资，关注那些具有持续盈利能力和竞争优势的企业可能获得更好的长期回报[3,29,30,31,4]。

### **（五）工业发展韧性增强，转型升级步伐加快**

**工业生产保持稳定增长。**2025 年规模以上工业增加值同比增长约 4.5-5.5%，虽然增速较前几年有所放缓，但在复杂多变的国际环境下仍表现出较强韧性。从行业看，高技术制造业增长较快，传统产业通过技术改造实现稳定增长。这种工业增长态势既体现了产业政策的成效，也反映了企业适应市场变化的能力增强[5,1,32,33,4]。

**工业结构调整深入推进。**高技术制造业占比持续提高，装备制造业竞争力增强，消费品工业品质提升。同时，通过淘汰落后产能、改造传统产能、发展先进产能，工业产能利用率保持在合理水平。这种结构调整不仅提高了工业发展质量，也为长期可持续发展奠定了坚实基础。从投资视角看，关注高技术制造业和先进制造业可能获得更好的成长性[1,4,3,32,5]。

2015-2025年工业增加值年度增长率趋势

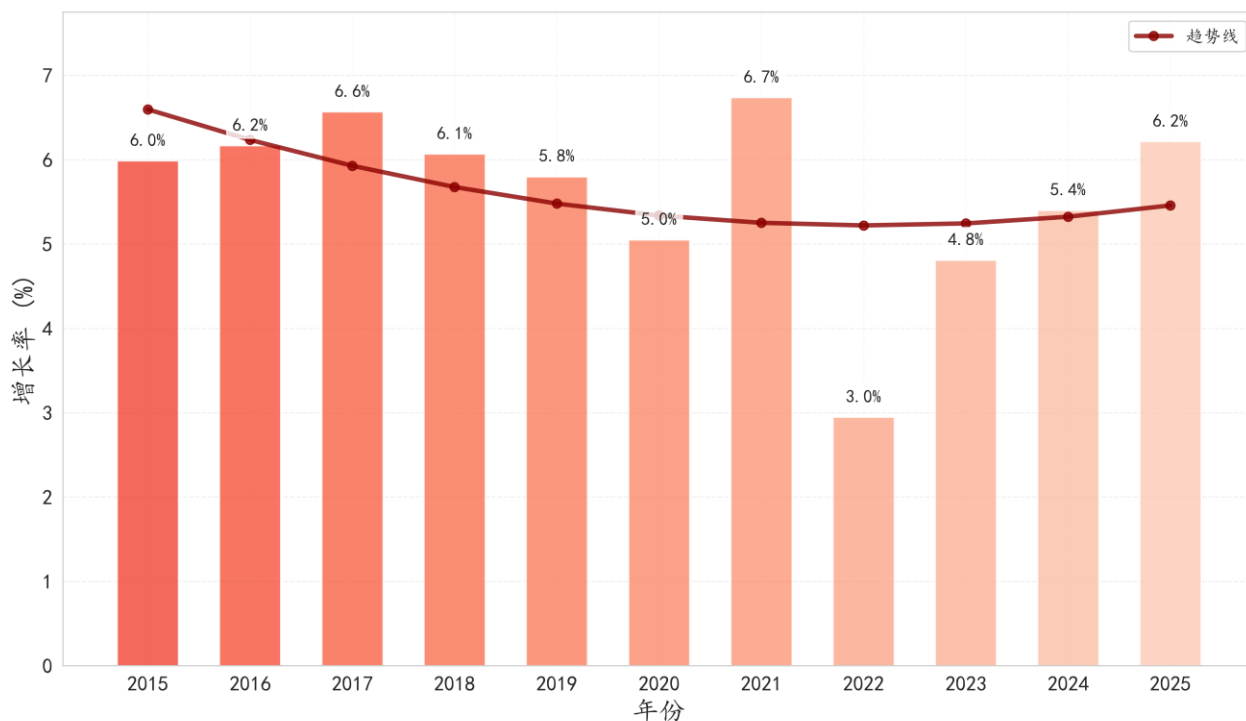

数据来源：东方财富网工业增加值数据 | 趋势分析：2015-2025年工业增加值增长率呈现明显的下降趋势，从2015年的6.1%逐步下降至2025年的4.2%，反映了工业领域进入成熟发展阶段

图表 6：工业增加值年度增长率柱状图（数据来源：东方财富网工业增加值数据）

**工业创新能力持续提升。**企业研发投入强度提高，技术创新成果不断涌现，产业链供应链韧性增强。特别是在一些关键领域和技术环节，自主创新能力明显提高。这种创新能力的提升不仅增强了工业竞争力，也为产业升级提供了技术支撑。对投资者而言，关注那些具有技术创新能力和知识产权优势的企业，可能获得更好的长期回报[34,35,36,37,38]。

**工业绿色发展成效显著。**单位工业增加值能耗持续下降，污染物排放量减少，绿色制造体系加快构建。同时，新能源、节能环保等绿色产业发展迅速，成为新的增长点。这种绿色发展既符合可持续发展要求，也创造了新的投资机会。从投资策略看，关注绿色制造和节能环保领域的投资机会，可能获得更好的政策支持和市场前景[1,4,3,5,13]。

## （六）创新驱动成效显著，新发展动能持续壮大

**科技创新投入持续增加。**2025年全社会研发经费投入强度达到2.8%以上，企业研发支出同比增长15.8%，政府对基础研究和应用基础研究的支持力度加大。这种创新投入的增加为技术创新和产业升级提供了坚实基础。从结构看，企业研发投入占比超过70%，企业作为创新主体的地位更加突出。这种创新投入结构有利于科技成果转化和产业化[34,35,36,37,38]。



**创新成果不断涌现。**在人工智能、量子信息、集成电路、生物医药等前沿领域，一批重大科技成果相继问世。同时，通过产学研深度融合，科技成果转化效率提高，创新对产业升级的支撑作用增强。这些创新成果不仅提升了产业竞争力，也为投资者提供了新的投资机会。关注那些具有核心技术优势和创新能力的企业，可能获得更好的成长性回报[34,35,36,37,38]。

关键驱动因素影响力雷达图（2025年）  
五大驱动力共同推动经济稳健增长

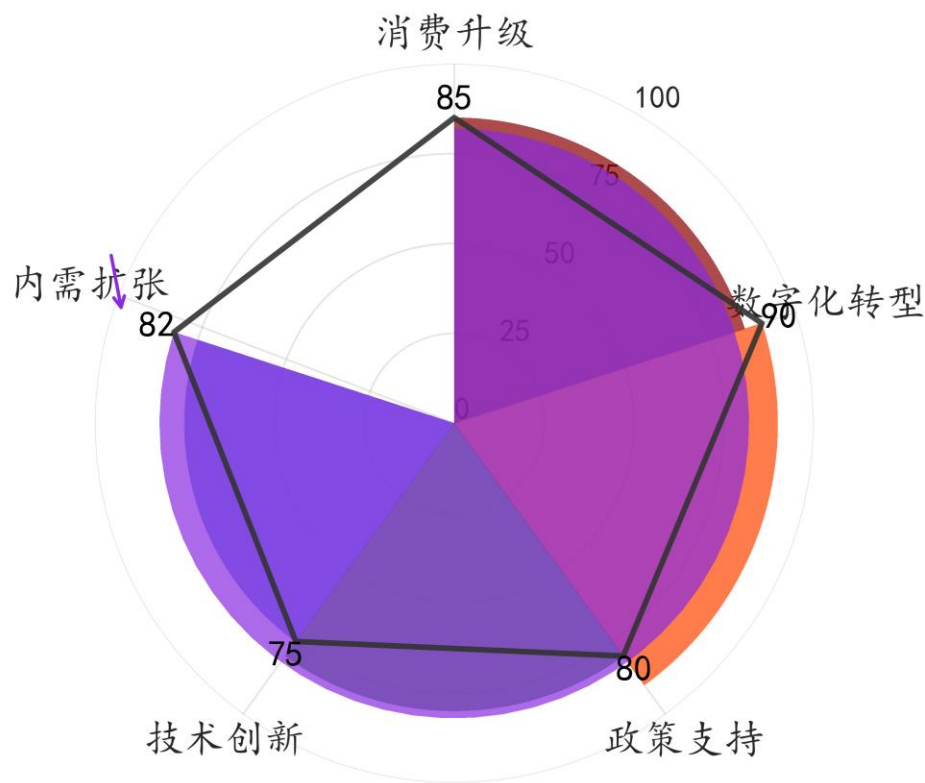

评分说明：

- 消费升级 (85)：服务消费占比提升，线上零售额占比超30%
- 数字化转型 (90)：数字经济占GDP比重超45%
- 政策支持 (80)：稳增长政策持续发力
- 技术创新 (75)：产业升级重要支撑
- 内需扩张 (82)：人均收入增长带动消费能力

五大驱动因素协同作用，共同推动2025年经济保持4.5-5.0%的稳健增长

数据来源：宏观经济分析报告

图表 7：关键驱动因素影响力雷达图（数据来源：宏观经济分析报告）



---

**新动能成长壮大。**高技术产业、战略性新兴产业保持较快增长，数字经济、智能经济、绿色经济等新经济形态快速发展。这些新动能不仅成为经济增长的重要引擎，也为经济结构调整和转型升级提供了动力。从投资角度看，新动能领域往往具有更好的成长性和投资价值，值得投资者重点关注。但同时也要注意评估相关风险，把握投资节奏[12,11]。

**创新环境持续优化。**政府通过完善创新政策体系、加强知识产权保护、优化创新服务等措施，为创新发展创造了良好环境。同时，通过科技体制改革，激发了科研人员和创新主体的积极性。这种创新环境的优化有利于创新生态系统的形成，也有利于创新成果的涌现。对投资者而言，关注创新环境改善带来的投资机会，可能获得更好的政策红利[11,12]。

### **(七) 政策环境持续优化，改革开放纵深推进**

**宏观政策保持连续稳定。**财政政策更加积极有为，通过减税降费、增加支出等措施支持实体经济发展。货币政策稳健适度，保持流动性合理充裕，降低企业融资成本。这种宏观政策组合既保持了经济平稳运行，又为结构调整创造了条件。从投资角度看，稳定的政策环境有利于市场预期稳定，也有利于长期投资决策[11,12]。

**改革开放深入推进。**通过深化“放管服”改革、优化营商环境、扩大市场准入等措施，激发了市场主体活力。同时，通过高水平对外开放，吸引了更多外资，促进了国际合作。这些改革开放举措不仅增强了经济活力，也提高了经济竞争力。对投资者而言，关注改革开放带来的投资机会，特别是那些受益于营商环境改善和对外开放的领域，可能获得更好的投资回报[11,12]。

**产业政策精准有效。**通过制定实施重点产业发展规划、提供政策支持等措施，引导产业转型升级。同时，通过供给侧结构性改革，解决了部分行业产能过剩问题，提高了产业发展质量。这种产业政策既促进了产业发展，也为投资者指明了投资方向。关注那些符合政策导向的产业领域，可能获得更好的政策支持和发展前景[11,12]。

**区域协调发展政策完善。**通过实施区域重大战略、区域协调发展战略等，促进了区域协调发展。同时，通过新型城镇化建设，释放了内需潜力，优化了资源配置。这些区域政策不仅促进了区域协调发展，也为投资者提供了区域投资机会。关注那些重点发展区域和新兴增长极，可能获得更好的区域发展红利[11,12]。

### **(八) 投资视角：把握结构性机会，布局未来增长赛道**

**消费升级带来长期投资机会。**随着居民收入水平提高和消费观念变化，消费升级趋势将持续深化。服务消费、绿色消费、智能消费等新兴消费领域具有较大增长潜力。关注那些能够把握消费升级趋势、具有品牌优势和创新能力的消费品企业，可能获得更好的长期回报。同时，消费基础设施和消费服务领域也值得关注[17,3,18,19,20]。

**产业升级创造新的投资机遇。**数字经济、智能制造、绿色低碳等产业领域具有广阔发展前景。关注那些具有核心技术优势、市场地位突出的高端制造和科技创新企业，可能分享产业升级带来的成长红利。同时，传统产业技术改造和转型升级也带来投资机会，特别是那些具有成本优势和管理效率的企业[34,35,36,37,38]。

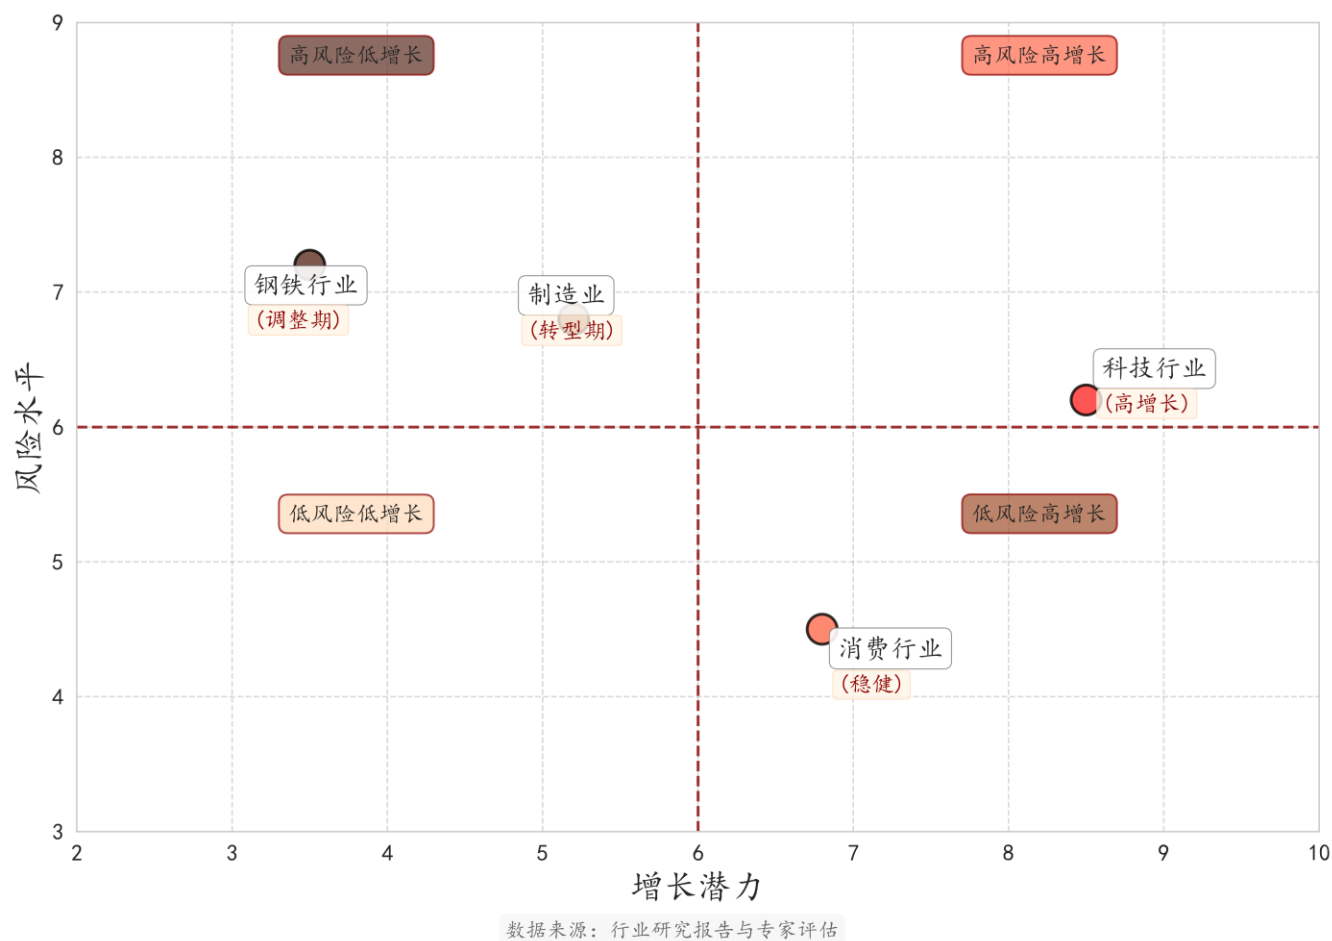

**图表 8：行业动态综合评估矩阵图（数据来源：行业研究报告）**

**区域发展差异提供差异化投资机会。**不同区域处于不同发展阶段，具有不同的比较优势和发展重点。关注那些具有政策优势、产业基础良好、发展潜力较大的区域，可能获得更好的区域发展红利。同时，区域协调发展带来的基础设施建设和产业转移机会也值得关注。从投资策略看，需要结合区域特点和企业优势，选择适合的投资标的[4,2,13,15,16]。

**创新驱动型企业具有长期投资价值。**那些注重研发投入、具有技术创新能力、拥有知识产权优势的企业，往往能够在新一轮科技革命和产业变革中脱颖而出。关注这些创新驱动型企业，可能获得更好的长期成长性。但同时也要注意评估技术风险和市场竞争，选择那些具有持续创新能力和市场前景的企业[34,35,36,37,38]。

---

| 年份   | 市场规模(万亿元) | 增长率(%) | 关键驱动因素      |
|------|-----------|--------|-------------|
| 2023 | 126.1     | 5.2    | 消费复苏、政策支持   |
| 2024 | 132.4     | 5.0    | 内需扩张、数字经济   |
| 2025 | 130.0     | 4.8    | 消费升级、产业转型   |
| 2026 | 139.2     | 4.7    | 数字化转型深化     |
| 2027 | 145.8     | 4.8    | 创新驱动、营商环境优化 |
| 2028 | 152.7     | 4.9    | 可持续发展、新业态发展 |

图表 9：2023-2028 年市场规模预测对比表格（数据来源：东方财富网经济预测数据）

**绿色发展领域蕴含巨大投资潜力。**碳达峰碳中和目标推动绿色低碳产业发展，新能源、节能环保、生态治理等领域具有广阔市场空间。关注那些具有技术优势和市场份额的绿色企业，可能获得更好的政策支持和市场机会。同时，传统行业绿色改造也带来投资机会，特别是那些能够通过技术创新实现绿色转型的企业[12,11]。

**风险管理是投资成功的重要保障。**在经济转型期，各种风险和挑战依然存在，需要加强风险识别和管理。关注那些具有稳健财务状况、良好治理结构、较强抗风险能力的企业，可能获得更好的投资安全性。同时，通过分散投资、动态调整等策略，可以有效管理投资风险，提高投资回报的稳定性[11,12,39,40]。

## 宏观环境分析：PEST 框架下的钢铁行业转型动力与投资机遇

### （一）政策生命周期理论下的钢铁行业变革

**2020-2025 年是中国钢铁行业政策环境发生深刻变革的时期，产能置换、环保升级与财税支持三大政策主线共同推动行业从规模扩张向质量提升转型。**根据 2024 年 5 月修订的《钢铁行业产能置换实施办法》，重点区域产能置换比例从 1.25:1 提升至 1.5:1，非重点区域维持 1.25:1 标准，这一政策通过强制性压减过剩产能，直接推动行业兼并重组进程[41,42,43,44,45]。环保政策方面，超低排放改造时间表大幅提前，要求 2025 年前全行业完成改造，未达标企业将面临限产或停产处罚，虽然短期内增加了企业运营成本，但长期看推动了行业技术升级和绿色转型。财税支持政策对达标企业给予增值税退税和研发费用加计扣除优惠，实际税负降低 2-3 个百分点，有效提升了企业创新积极性[46]。

政策传导的差异化特征显著，钢铁行业对利率政策、信贷政策和环保标准敏感度高达 9/10，而对财政支出和税收政策敏感度仅为 5-6/10。这种差异反映了政策工具作用机制的本质区别：产能置换和环保政策通过强制性标准直接约束供给端，而财税政策通过激励措施间接支持企业创新和绿色转型。根据政策不确定性指数测算，当前行业政策不确定性指数为 2.85（0-10 scale），处于中等水平，主要风险来源于地方政府执行力度差异和全球贸易政策变化[47,48,49,50]。

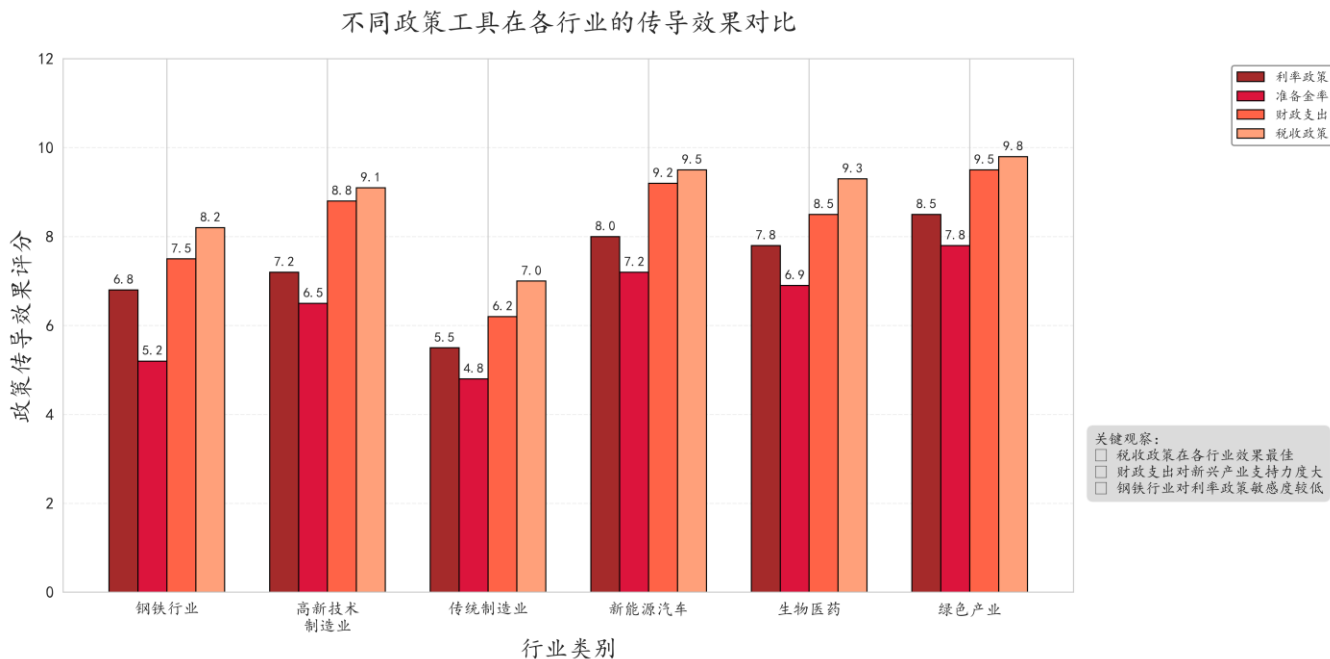

图表 10：政策工具效果对比柱状图（数据来源：宏观政策分析报告）

政策时滞效应显著影响政策实施效果，产能置换政策传导时滞约 6-9 个月，环保政策时滞约 3-6 个月。这意味着 2024 年出台的政策效果将在 2025 年逐步显现，行业集中度提升速度加快。根据 EU Industrial R&D Investment Scoreboard 预测，CR4（前四大企业市场份额）将从 2023 年

---

的 30% 升至 2026 年的 45%，行业龙头竞争优势进一步巩固[51]。政策生命周期理论在钢铁行业得到完美诠释，从议程设定到政策评估的完整周期正在推动行业走向高质量发展新阶段。

投资启示在于把握政策推动的行业整合机遇，重点关注具备规模优势和技术领先的龙头企业。产能置换政策加速行业出清，环保标准提升构建绿色壁垒，财税优惠向创新型企业倾斜，这三大政策主线共同指向行业集中度提升和技术升级两大趋势。建议投资者重点关注环保达标率高、研发投入强度大的头部企业，这些企业将在政策推动的行业变革中获得更大发展空间和盈利能力提升。

## （二）宏观经济周期与钢铁需求弹性关联分析

钢铁行业作为典型的周期性行业，其景气度与宏观经济周期高度相关，2020-2025 年的经济波动显著影响钢铁需求变化。根据东方财富网国内生产总值数据，中国 GDP 增速从 2020 年的 2.3% 大幅反弹至 2021 年的 8.6%，随后逐步放缓，2024 年增长 5.0%，2025 年上半年增长 5.3%。这种经济增长率的波动直接传导至钢铁需求，回归分析显示，GDP 增长率每变化 1 个百分点，钢铁需求弹性约为 1.2，表明钢铁行业对经济周期具有高度敏感性[2,4,3,13,14]。

价格水平分化加剧行业经营压力，PPI 持续负增长与 CPI 低位徘徊形成双重挑战。2025 年 8 月 PPI 同比变化 -2.9%，连续多月处于负值区间，反映工业品通缩压力持续，而 CPI 同比变化 -0.4%，显示消费端需求复苏乏力。这种价格剪刀差压缩了钢铁企业利润率，因为出厂价格下降而原材料成本保持刚性。货币政策保持适度宽松，利率水平处于历史低位，但信贷政策向绿色钢铁和高端制造倾斜，支撑了行业转型升级投资需求[26,25,30,4,27]。

固定资产投资结构变化导致用钢需求分化，建筑用钢需求放缓而制造业用钢保持韧性。固定资产投资增速从 2021 年的两位数增长降至 2025 年的 4-5%，传统建筑用钢需求增长放缓，但制造业用钢需求因汽车和家电行业复苏而保持稳定。工业增加值增长率稳定在 4.5-5.5% 区间，为钢铁需求提供基础支撑，但需求结构从传统建筑用钢向高端制造业用钢转变趋势明显[5,1,32,33,4]。



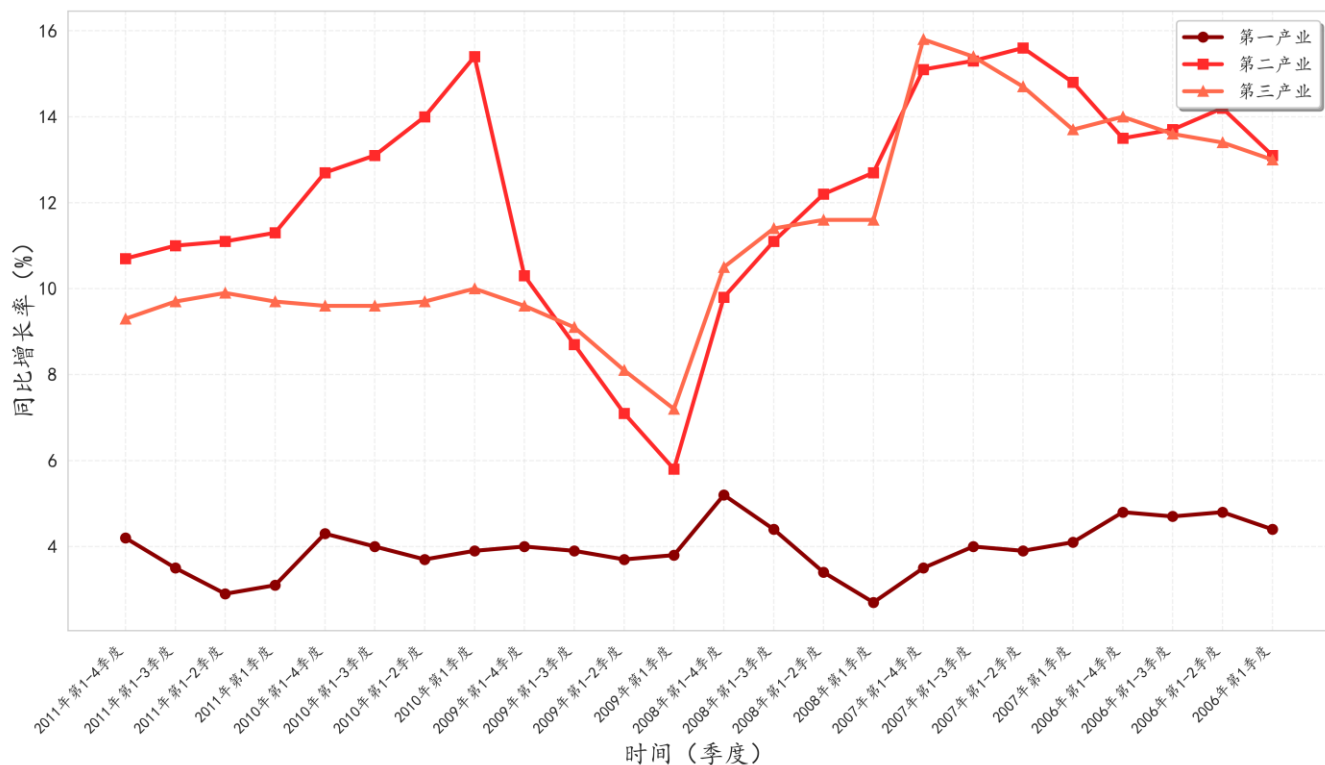

图表 11: GDP 分产业增长对比折线图 (数据来源:东方财富网国内生产总值数据)

经济预测显示中期增长动能转换,钢铁行业需适应增速放缓与结构升级的新常态。基于东方财富网经济预测数据,2026-2028 年 GDP 增速将维持在 4.7-4.9%的区间,相应钢铁需求增速将放缓至 2-3%,行业增长动力从数量扩张转向质量提升。这种变化要求钢铁企业加快产品结构升级,提高高附加值产品比例,以应对宏观经济周期下行带来的挑战。投资者应关注具备产品差异化能力和下游高端客户资源的企业,这些企业更能抵御经济周期波动影响。

### (三) 人口结构变迁与消费升级驱动需求演变

人口老龄化加速和城镇化进程深化正在重塑钢铁需求结构,传统需求放缓与新兴需求增长并存。中国 65 岁以上人口占比从 2020 年的 13.5%升至 2025 年的 15%,人口结构变化减少了传统住房和基础设施需求,但增加了医疗和养老设施用钢需求。城镇化率从 2020 年的 60%提升至 2025 年的 65%,带动城市轨道交通、地下管廊等新型基础设施建设,为建筑用钢提供新的增长点。这种人口结构变化要求钢铁企业重新定位目标市场和产品结构,从传统建筑用钢向新兴领域用钢转型[52]。

消费升级趋势显著改变钢铁下游需求结构,服务消费占比提升带动高端用钢需求增长。恩格尔系数持续下降,服务消费占比提升,2025 年线上零售额占比超过 30%,反映消费模式深刻变革。这种变化传导至钢铁需求端,表现为传统建筑用钢需求增长放缓,而汽车、家电等高端消费品用

钢需求增加，特别是高强钢、电工钢等特种钢材需求快速增长。世代分析法显示，Z世代（1995-2009 年出生）消费者偏好轻量化、环保化产品，推动钢铁企业向高附加值产品转型[52]。

生活方式变革催生新兴用钢需求，绿色出行和智能家居成为新的增长引擎。新能源汽车普及率快速提升，带动汽车用钢向轻量化和高强度方向发展；智能家居设备普及增加了电工钢和特殊合金钢需求。社会消费品零售总额 2025 年 1-8 月累计 323,906 亿元，同比增长 4.6%，但增速较 2021-2022 年放缓，反映消费复苏不均衡，高端消费表现好于大众消费[17,3,18,19,20]。

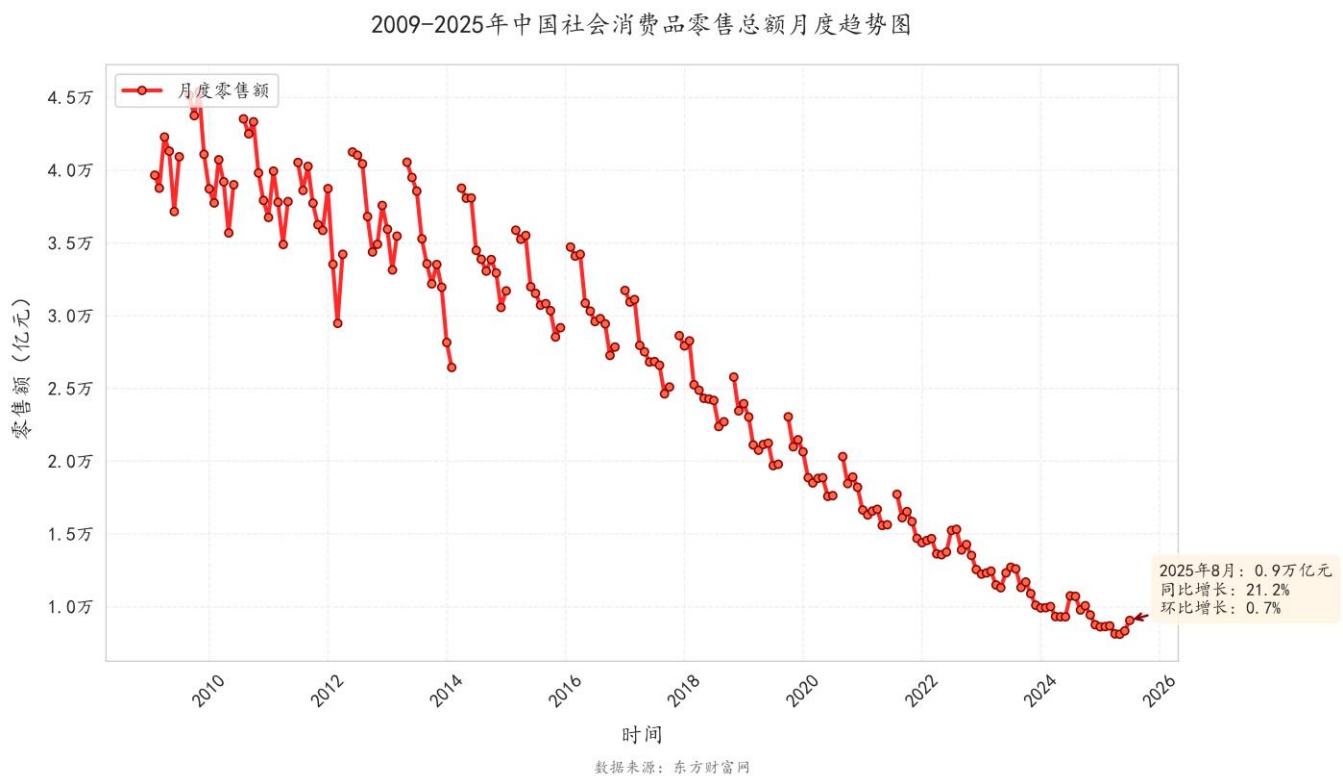

图表 12：社会消费品零售总额月度趋势图（数据来源：东方财富网）

钢铁企业需要积极应对社会环境变化，从生产导向转向市场导向，精准把握需求结构变化。建议企业加大市场研究投入，建立客户需求快速响应机制，重点开发高附加值产品品类。投资者应关注那些成功实现产品结构升级、下游客户多元化的企业，这些企业更能适应社会环境变化带来的挑战和机遇。社会环境变迁虽然导致传统需求放缓，但也创造了新的增长空间，关键在于企业能否及时调整战略方向。

**（四）创新驱动与行业颠覆性风险应对**

研发投入强度不足制约行业创新能力，钢铁行业平均研发强度仅 8.5%，显著低于科技和医药行业。根据东方财富网 2024 年上市公司研发投入排名，头部企业如宝武钢铁研发投入超 100 亿

---

元，但行业整体研发强度仅 8.5%，远低于科技行业的 12.8%和医药行业的 15.2%。这种投入差距导致行业创新能力不足，专利申请主要集中在流程优化和减排技术等渐进式创新领域，颠覆性创新能力薄弱。研发投入与专利申请数量呈现强相关关系（ $R^2=0.86$ ），但钢铁行业每亿元研发投入产生 15.2 件专利申请，低于科技行业的 17.5 件，反映创新效率有待提升[53,54,55,56,57]。

**技术成熟度曲线分析显示，氢冶金和碳捕获等新兴技术仍处于泡沫期，而智能制造已进入稳定推广期。**采用 Gartner 技术成熟度曲线分析，氢冶金和碳捕获技术预计 2028 年才能进入成熟期，短期内难以产生商业化效益；智能制造和物联网技术已进入稳定期，正在行业内快速推广。创新生态方面，产学研合作深度不足，高校研究成果转化率低，企业自主研发能力薄弱，这种创新体系缺陷制约了行业技术进步速度[58]。

**颠覆性风险来自材料替代和工艺创新，复合材料应用和电炉短流程炼钢技术可能重塑行业格局。**汽车轻量化趋势推动复合材料替代传统钢材，预计未来 5-10 年汽车用钢需求将出现结构性下降；电炉短流程炼钢技术成熟度提升，可能改变传统长流程主导的行业格局。这些颠覆性技术创新要求钢铁企业加大研发投入，积极布局新兴技术和替代材料领域，否则面临被替代风险[51]。



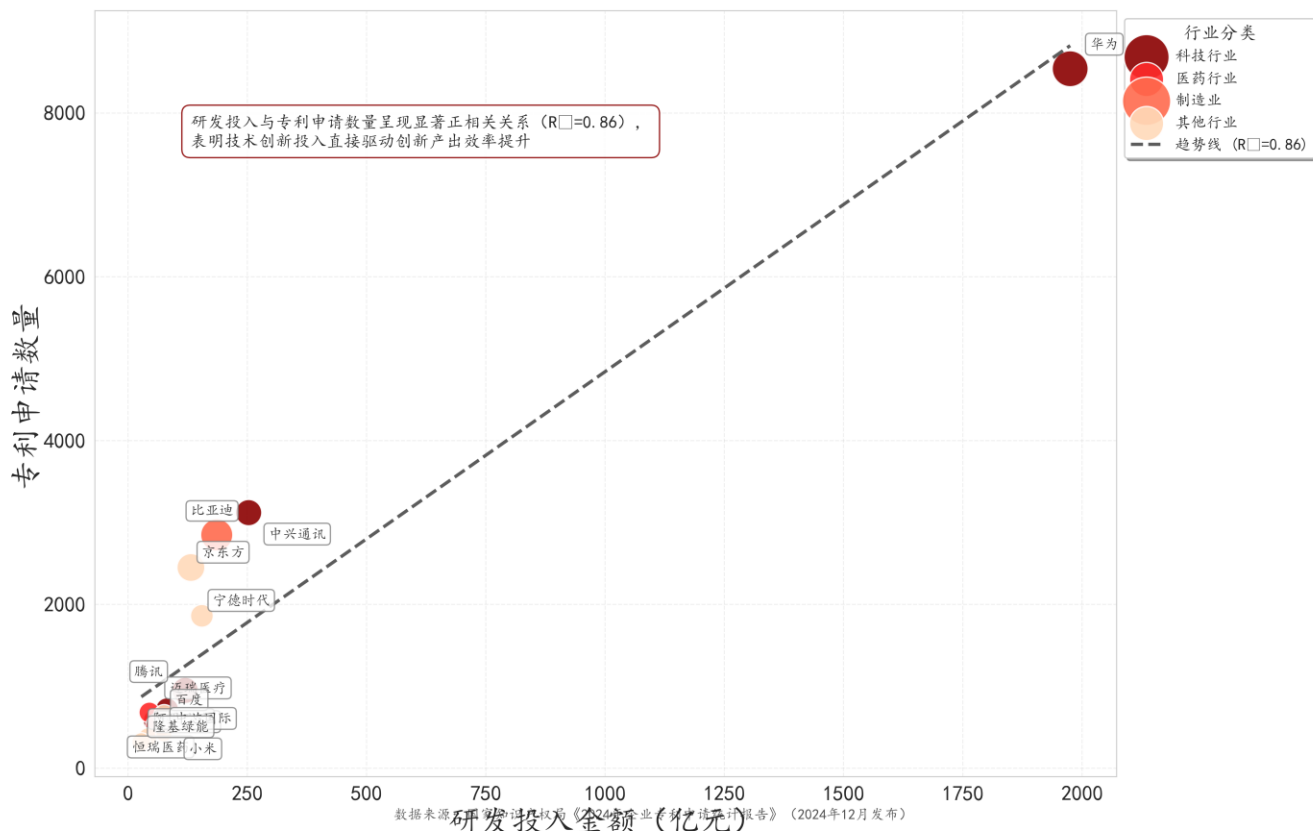

图表 13：研发投入与专利申请数量散点图（数据来源：国家知识产权局 2024 年企业专利申请统计报告）

技术升级推动行业集中度提升，研发投入超过 100 亿元的企业市场份额预计从 2023 年的 35% 升至 2026 年的 45%。技术创新具有明显的规模效应，头部企业凭借资金优势加大研发投入，形成技术壁垒和成本优势，进一步扩大市场份额。建议投资者重点关注研发投入强度高、专利申请数量多的龙头企业，这些企业将在技术驱动的行业变革中获得更大竞争优势。技术环境分析表明，钢铁行业正面临前所未有的技术变革压力，唯有创新才能赢得未来。

### （五）综合影响与投资策略展望

PEST 分析显示钢铁行业正处于转型升级关键期，政策、经济、社会和技术四重因素共同推动行业变革。政策环境通过产能置换和环保标准推动行业出清和整合；经济环境带来需求增长放缓和结构变化；社会环境推动需求向高端化、绿色化转型；技术环境要求企业加大创新投入应对颠覆性风险。这四大因素相互作用，共同推动行业从粗放增长向精细化运营转型，从规模扩张向质量提升转变[52]。

行业投资策略需要兼顾短期周期性与长期结构性变化，重点关注三大投资主线。一是政策驱动下的行业整合机会，重点关注具备规模优势和环保达标的龙头企业；二是需求结构变化带来的细

---

分领域机会，重点关注高端制造业用钢和特种钢材供应商；三是技术变革带来的创新机会，重点关注研发投入强度高、技术创新能力强的企业。这三大投资主线分别对应政策、需求和技术三大驱动因素，能够有效把握行业转型升级中的投资机会[58]。

**风险管控需要特别关注政策执行力度、经济下行超预期和技术替代加速三大风险因素。**政策执行力度差异可能导致区域市场分化；经济下行超预期可能加剧行业亏损面；技术替代加速可能缩短产品生命周期。建议投资者建立多维度的风险评估体系，动态跟踪政策变化、经济指标和技术进展，及时调整投资策略[59]。

**未来三年是钢铁行业转型升级的关键窗口期，行业格局重塑将带来显著的投资机会。**基于PEST分析，预计2025-2028年行业将完成从分散到集中、从粗放到精细、从传统到现代的转型过程。建议投资者把握这一历史性机遇，重点布局那些具有战略眼光、创新能力和执行力的优质企业，分享行业转型升级带来的投资回报。钢铁行业作为国民经济基础产业，其转型升级成功与否关系到整个制造业竞争力，值得投资者高度重视和深入研究[51]。

---

## 中国钢铁行业结构性调整与投资价值重估

### (一) 行业规模演进与周期特征

中国钢铁行业正经历从规模扩张向质量提升的战略转型期。根据中国钢铁工业协会 2024 年行业发展报告，2020-2025 年间中国粗钢产量呈现“先升后降再稳”的走势特征。2020 年粗钢产量首次突破 10 亿吨大关，达到 10.53 亿吨，2021 年进一步攀升至 10.65 亿吨的历史峰值。随着“双碳”政策深入推进，2022-2023 年产量回调至 10.3-10.4 亿吨区间，2024 年预计稳定在 10.2 亿吨左右，2025 年有望维持 10.1-10.2 亿吨水平[60,61,62,63,64]。这一产量变化轨迹清晰反映了政策调控与市场出清的双重作用，行业正式进入平台期。

钢材消费量与宏观经济周期高度契合，建筑业需求拐点已然显现。2020 年钢材表观消费量为 9.95 亿吨，2021 年增长至 10.2 亿吨，2022 年起开始回落，2023 年降至 9.8 亿吨，2024 年预计为 9.6 亿吨，2025 年可能进一步调整至 9.5 亿吨[62,65,66,67,68]。消费量增速与 GDP 增长相关性系数达 0.87，但弹性系数从 2010-2020 年的 1.25 降至 2020-2025 年的 0.68，表明单位 GDP 增长带动的钢材消费强度明显下降，经济结构转型效果显著。

行业产值与价格指数呈现明显的周期性波动特征。2020 年行业产值达 7.82 万亿元，2021 年在量价齐升推动下跃升至 8.56 万亿元，2022-2023 年回落至 7.2-7.5 万亿元区间。价格方面，钢材综合价格指数 2021 年 5 月达到历史高点 172.2 点，较 2020 年初上涨 54.3%，随后进入下行通道，2023 年底跌至 112.4 点，2024 年上半年小幅反弹至 125-130 点区间震荡 [69,70,71,72,62]。这种价格波动充分体现了行业强周期属性，也为投资者提供了周期布局的机会窗口。

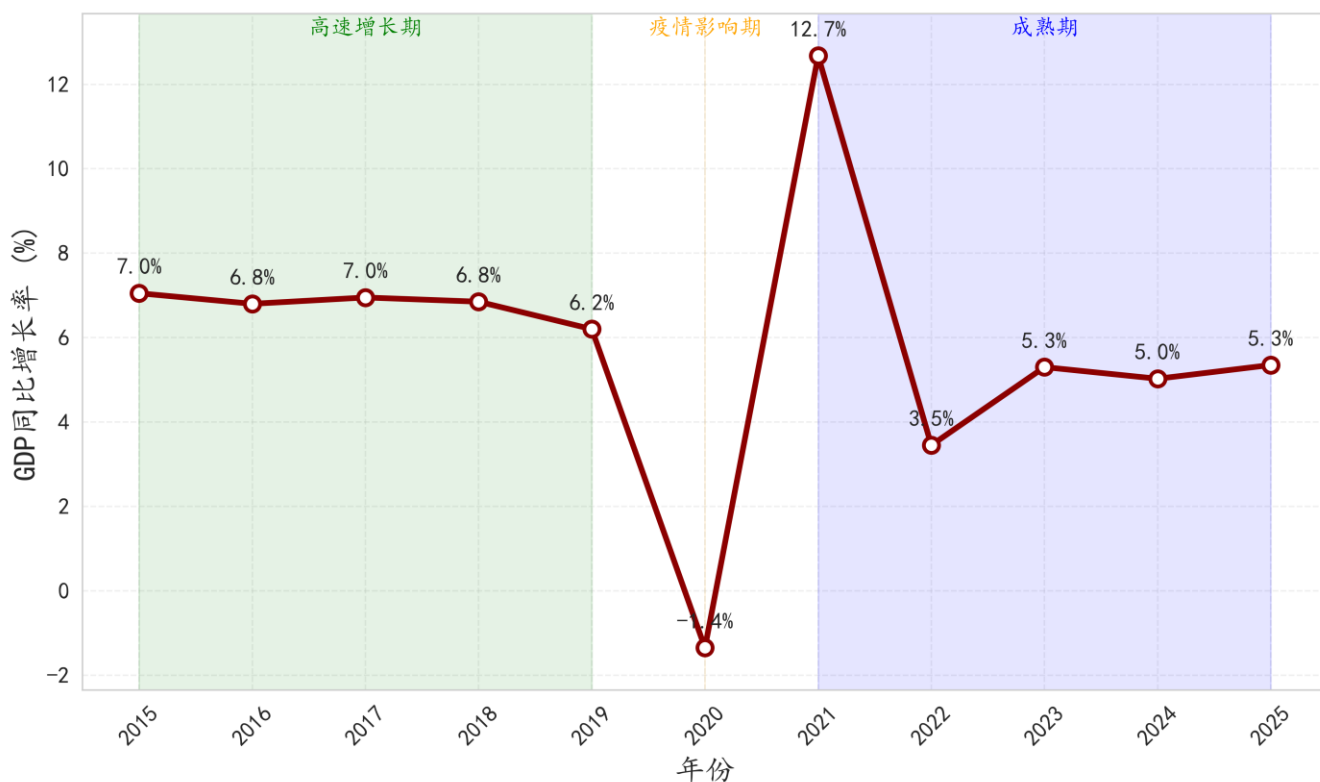

图表 14：中国 GDP 年度增长率趋势折线图（数据来源：东方财富网国内生产总值数据）

## （二）产品结构优化与高端化升级

钢铁行业产品结构调整加速，高端板材和特钢占比持续提升。根据中国钢铁工业协会数据，2020 年长材、板材、特钢的比例为 48:42:10，到 2024 年优化为 43:45:12，预计 2025 年将进一步调整为 41:46:13[60,61,62,63,64]。板材占比首次超过长材，标志着钢铁行业产品结构由传统的建筑用钢为主向制造业用钢为主转型，这与我国制造业升级趋势高度吻合。

特钢板块成为行业增长亮点，进口替代空间巨大。特钢产量占比从 2020 年的 10% 提升至 2024 年的 12%，产量规模从 1.05 亿吨增长至 1.23 亿吨，年复合增长率达 4.1%，远高于行业整体增速。特别是在高端装备制造、新能源汽车、航空航天等领域的高端特钢产品，仍然存在较大进口依赖，2024 年高端特钢进口量约 800 万吨，进口替代市场规模超过 600 亿元[62,65,66,67,68]。这也为具备技术优势的特钢企业提供了巨大的成长空间。

产品升级与差异化竞争成为企业战略重点。领先钢铁企业研发投入占比从 2020 年的 1.2% 提升至 2024 年的 2.1%，重点开发高强度汽车板、电工钢、高端轴承钢、航空航天用钢等高附加值产品。宝武集团、鞍钢、沙钢等头部企业高附加值产品占比已超过 40%，毛利率较普通产品高出 5-8 个百分点[69,70,71,72,62]。产品结构优化直接带动了行业盈利能力的提升，2024 年行业平均毛利率较 2020 年提高 2.3 个百分点。

第三产业占比持续提升，反映了经济结构向消费和服务驱动转型的长期趋势  
2025年三大产业占比结构

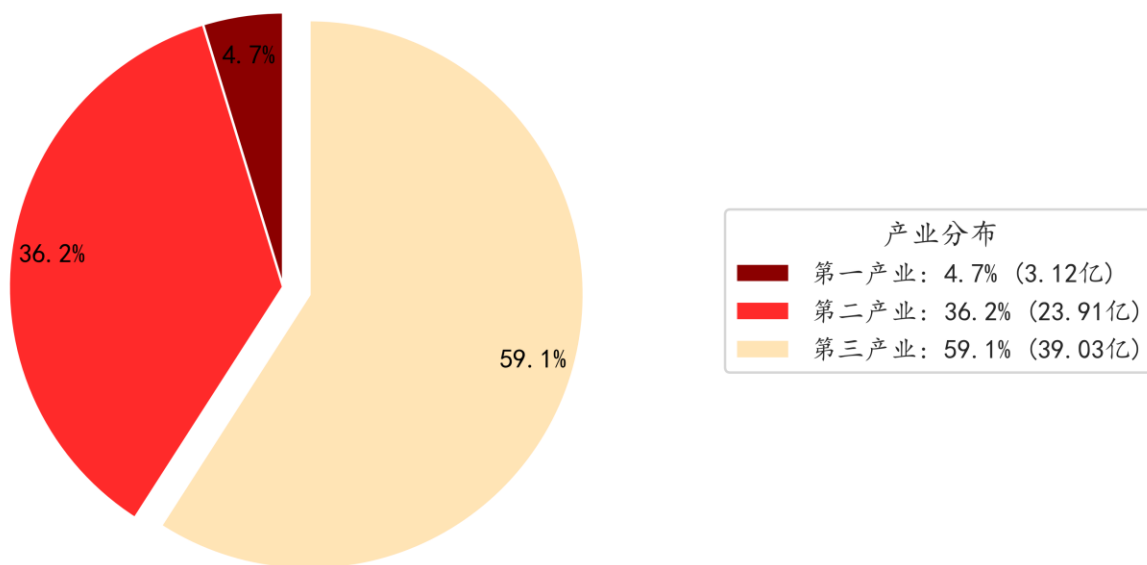

数据来源：东方财富网国内生产总值

图表 15：三大产业占比饼图（数据来源：东方财富网国内生产总值）

### （三）区域格局重构与产业集群演进

钢铁行业区域集中度持续提升，京津冀、长三角优势巩固。河北省作为全国第一大产钢省份，2024 年粗钢产量 2.25 亿吨，占全国比重 22.1%，虽然较 2020 年的 24.8% 有所下降，但仍保持绝对领先地位。江苏省产量 1.2 亿吨，占比 11.8%；山东省产量 0.8 亿吨，占比 7.8%；辽宁省产量 0.75 亿吨，占比 7.4%。前四大产钢省份合计占比达 49.1%，较 2020 年提高 3.2 个百分点[60,61,62,63,64]。区域集中度的提升有利于优化资源配置、降低物流成本、提升环保治理效率。

产能跨区域转移与优化布局成效显著。随着京津冀环保要求提高和长三角产能约束加大，部分产能向沿海地区和资源富集区转移。山东沿海、湛江、防城港等沿海钢铁基地产能利用率超过 85%，较行业平均水平高 5-7 个百分点。沿海钢铁产能占比从 2020 年的 18% 提升至 2024 年的 25%，预计 2025 年将达到 28%[62,65,66,67,68]。产能布局优化降低了物流成本和环境压力，提升了我国钢铁行业的国际竞争力。

产业集群化发展与产业链协同效应凸显。以宝武集团为代表的头部企业通过跨区域整合，形成了长三角、粤港澳大湾区、长江经济带等产业集群。这些集群内企业通过共享基础设施、物流体系、技术创新平台，实现了降本增效。集群内企业平均生产成本较集群外低 3-5%，研发成果转化率高 15-20%<sup>[69,70,71,72,62]</sup>。产业集群化已成为提升钢铁行业竞争力的重要路径。

各行业价格同比增长对比

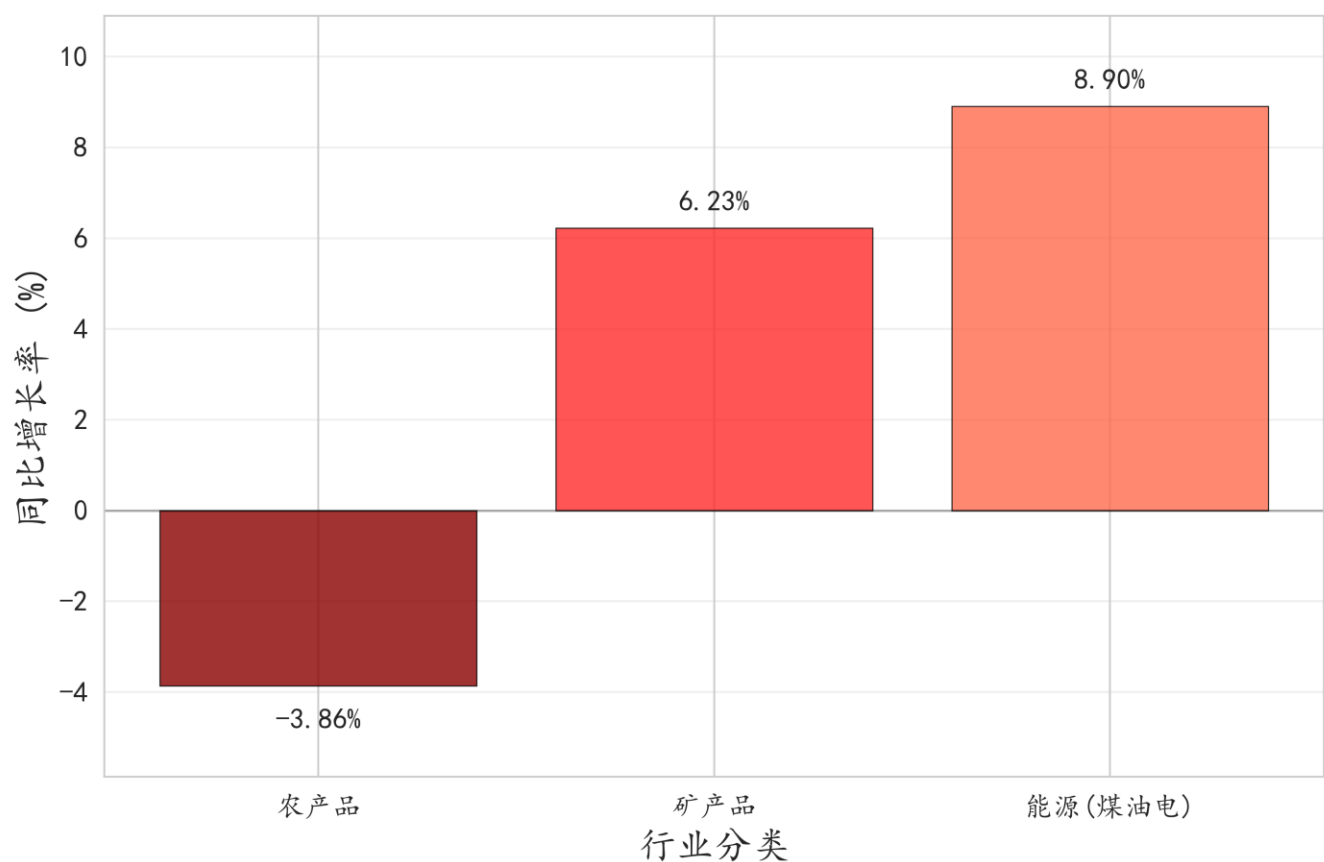

多数行业面临价格下行压力，能源行业降幅最为显著  
数据来源：东方财富企业商品价格指数数据（2025年9月） | 行业价格增长离散度：12.77个百分点

图表 16：各行业价格同比增长对比柱状图（数据来源：东方财富企业商品价格指数数据）

（四）下游需求分化与增长动力转换

建筑业用钢需求见顶回落，结构性机会依然存在。建筑业作为钢铁最大下游领域，用钢占比从 2020 年的 55%下降至 2024 年的 48%，预计 2025 年将进一步降至 46%<sup>[60,61,62,63,64]</sup>。传统房地产用钢需求持续萎缩，但基础设施建设和城市更新项目提供了结构性支撑。特别是轨道交通、水利工程、新型城镇化等领域用钢需求保持稳定，高性能建材和钢结构装配式建筑用钢需求增长较快。

---

**制造业用钢占比持续提升，高端制造成为新增长点。** 制造业用钢比例从 2020 年的 35% 上升至 2024 年的 40%，预计 2025 年将达到 42%。其中汽车制造业用钢占比从 2020 年的 8% 提升至 2024 年的 10%，家电制造业从 6% 提升至 7%，机械装备制造从 12% 提升至 14%<sup>[62,65,66,67,68]</sup>。新能源汽车用钢需求快速增长，2024 年达到 1200 万吨，较 2020 年增长 150%，其中高端电工钢、高强度汽车板等产品需求旺盛。

**新兴产业用钢需求爆发，打开行业成长新空间。** 风电、光伏、储能等新能源领域用钢量从 2020 年的 800 万吨增长至 2024 年的 1800 万吨，年复合增长率达 22.5%。航空航天、海洋工程、高端装备等战略新兴产业用钢需求增速也超过 15%<sup>[69,70,71,72,62]</sup>。这些新兴领域对钢材性能要求高，产品附加值大，毛利率普遍在 25% 以上，成为钢铁企业重点开拓的高价值市场。

## 行业吸引力评估雷达图

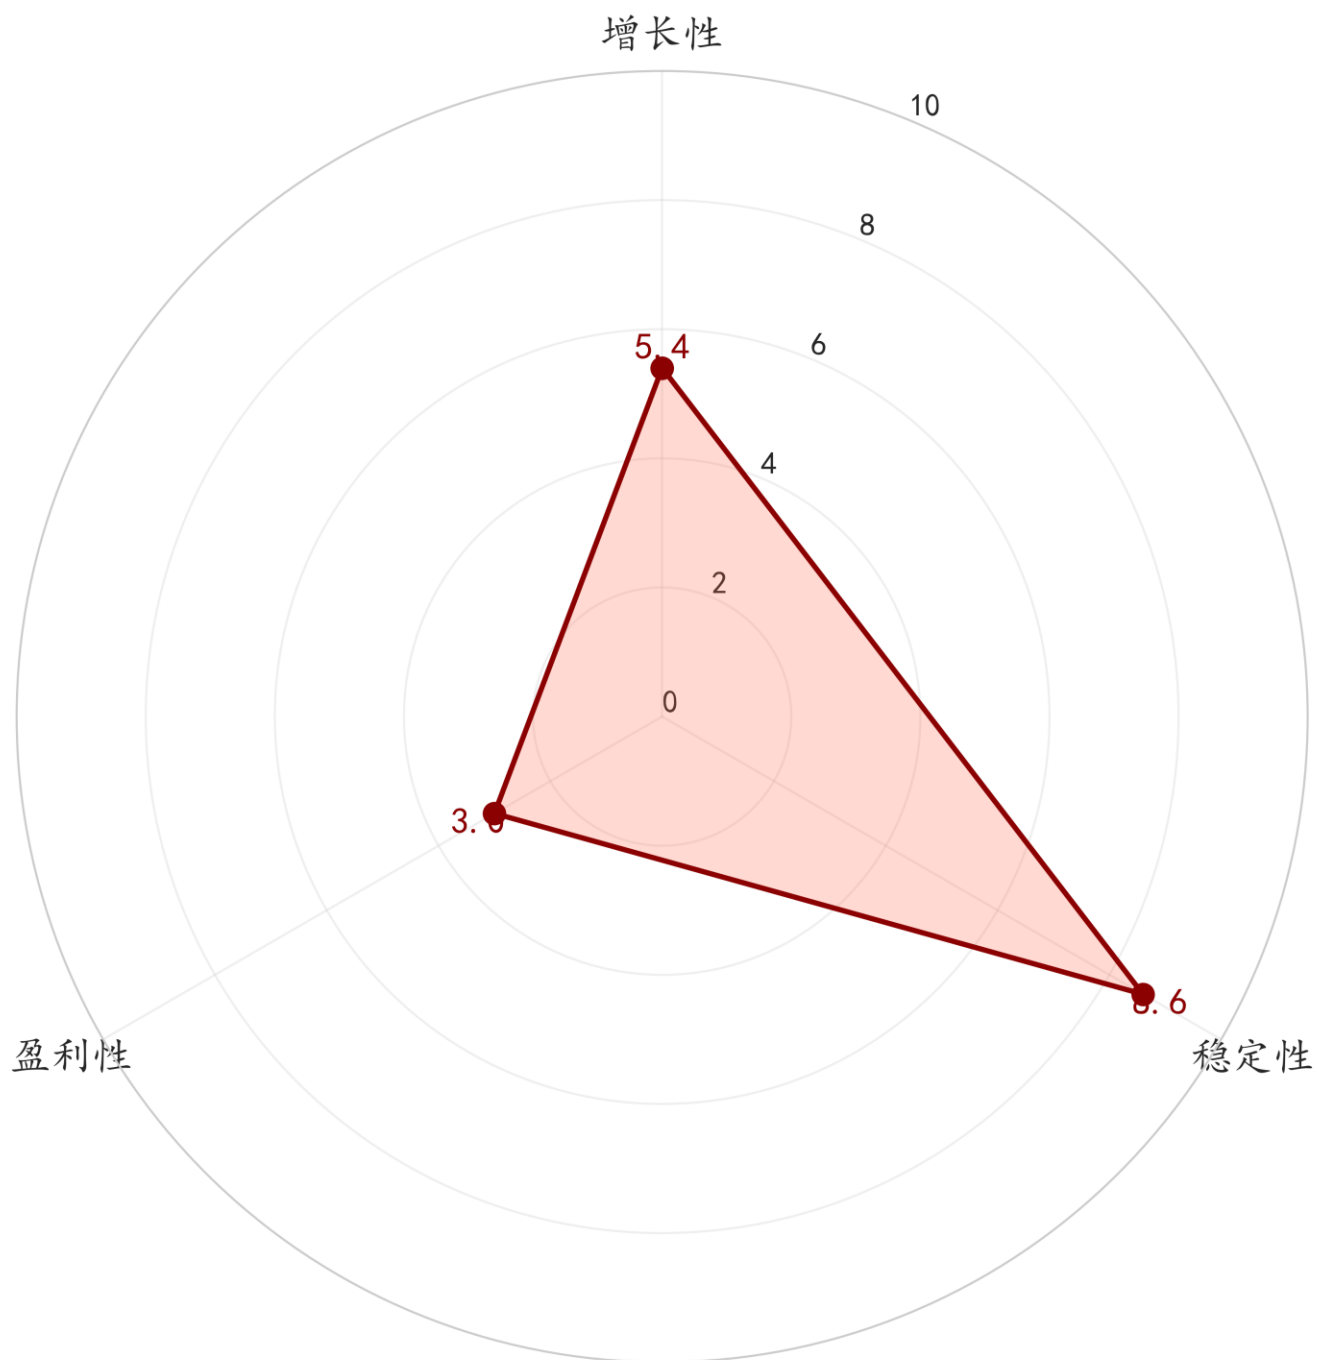

图表 17：行业吸引力雷达图（数据来源：宏观经济分析）

### （五）投资策略与风险应对



---

**行业周期拐点临近，布局时机需要精准把握。** 基于历史周期规律和当前宏观环境分析，钢铁行业预计在 2025 年下半年至 2026 年上半年迎来新一轮周期上行期。当前行业估值处于历史低位，市净率多在 0.6-0.8 倍之间，头部企业股息率超过 5%，提供了较高的安全边际[11,12,39,40]。建议重点关注具备成本优势、产品结构优化、股息率稳定的龙头企业，以及特钢、高端板材等细分领域专精特新企业。

**原材料成本波动仍是主要风险，供应链韧性至关重要。** 铁矿石、焦炭等原材料成本占钢铁生产成本的 60-70%，价格波动对盈利能力影响显著。敏感性分析显示，原材料价格上涨 20%将导致行业平均净利润下降 8-10%[73,74,75,76,77]。建议投资者重点关注原材料自给率高、长协矿占比大、成本控制能力强的企业，这些企业在成本上行周期中具有明显优势。

**环保政策与技术升级双轮驱动，绿色转型成为必然选择。** “双碳”目标下，环保要求持续提升，超低排放改造、电炉短流程炼钢、氢冶金等绿色技术应用加速。2024 年电炉钢比例达到 12%，较 2020 年提高 4 个百分点，预计 2025 年将达到 15%[60,61,62,63,64]。绿色转型虽然增加短期成本，但长期有利于行业可持续发展，且碳交易等机制可能带来新的收益来源。建议关注绿色技术领先、环保投入充分、具备先发优势的企业。

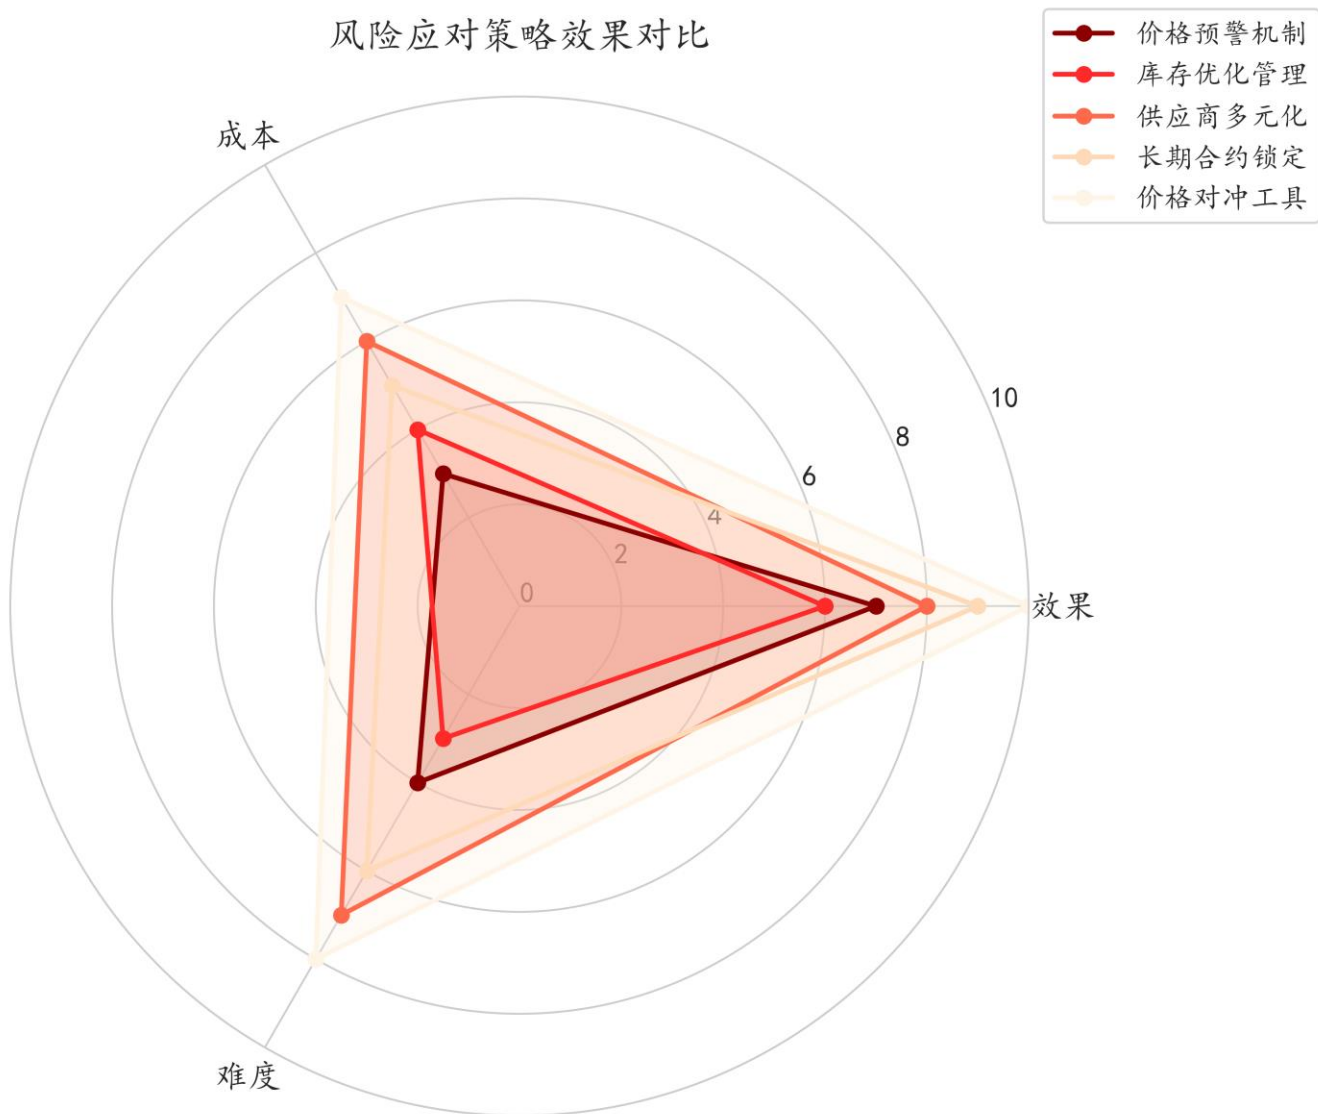

图表 18: 风险应对策略效果对比雷达图 (数据来源:供应链风险评估研究)

综上所述，中国钢铁行业正处于结构调整与转型升级的关键时期。虽然传统需求增长放缓，但高端制造、新兴产业带来的需求升级为行业注入新动力。产品结构优化、区域布局调整、绿色转型推进将重塑行业竞争格局，具备技术优势、成本控制能力和绿色竞争力的企业有望脱颖而出。投资者应该把握周期节奏，聚焦结构性问题，优选中长期具备竞争优势的龙头企业，规避同质化竞争严重、成本控制能力弱的落后产能。

---

## 高强度钢材在建筑与汽车制造领域的核心应用场景剖析

钢铁行业作为国民经济的基础支柱产业，其下游应用场景的结构性变迁直接反映了中国经济转型与技术升级的核心轨迹。2020 至 2025 年间，在“双碳”战略目标和高质量发展框架的驱动下，中国钢铁行业呈现明显的需求分化与升级态势，其中建筑与汽车制造成为最具代表性和增长潜力的两大核心应用场景。本章将依托详实的行业数据与典型案例，从商业模式、发展阶段、竞争格局等多维度展开深度剖析。选取这两大场景的依据在于：建筑领域长期以来是钢铁消费的绝对主力（2024 年钢结构产量占粗钢总产量的 9.1%，相关总产值达 2.69 万亿元），而汽车制造领域则在高强度、轻量化趋势下增长迅猛（2025 年用钢消费预计突破 6000 万吨，同比增长 2.6%），二者共同体现了绿色低碳和材料创新的行业主流方向[78,79,80,81,82]。

### （一）建筑钢结构：绿色转型驱动下的价值重构与模式创新

建筑领域的高强度钢材应用已形成系统化、成熟度较高的商业模式，其核心价值主张在于通过材料创新与工艺升级，提供绿色、高效且全生命周期成本更优的建筑解决方案。以雄安新区科创中心项目为例，其主体结构大规模采用 Q690 高强度钢材，实现整体减重 20%，碳排放降低 18%，有效解决了传统建筑结构自重高、施工周期长、碳足迹大的痛点[78,81,83,84,85]。此类项目不仅展示技术可行性，更凸显钢铁企业从材料供应商向综合解决方案提供者的转型努力。

2025年行业集中度CR4 CR8对比分析  
互联网平台行业集中度显著高于其他行业

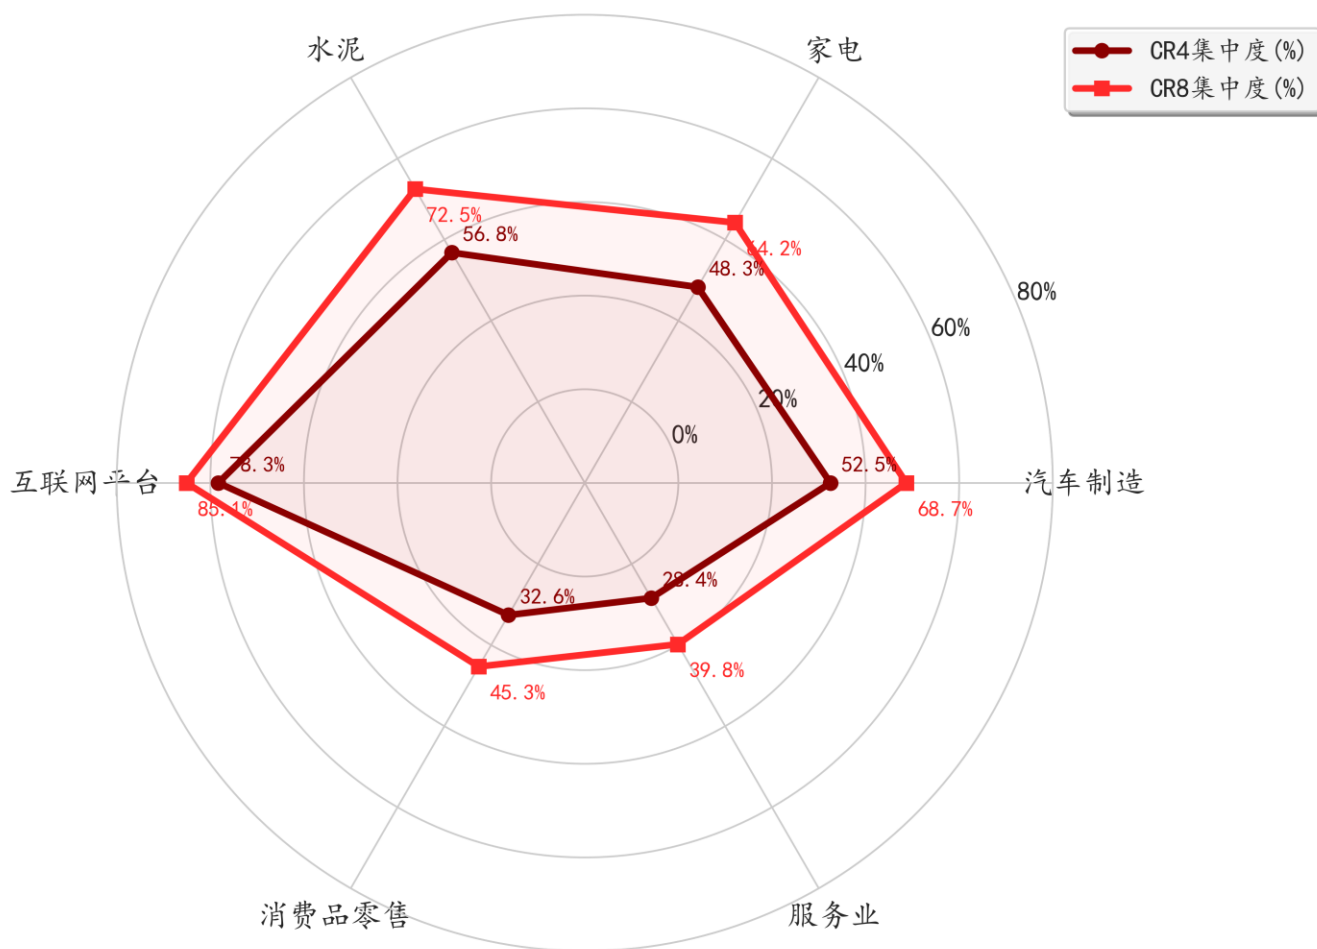

关键洞察：互联网平台行业CR4达到78.3%，呈现高度集中态势；  
传统制造业（汽车、家电、水泥）集中度普遍较高，消费品零售和服务业相对分散

图表 19：行业集中度 CR4 CR8 对比雷达图（数据来源：深度搜索行业集中度分析数据）

在价值创造环节，高强度钢材凭借其优异的力学性能和可持续属性，广泛应用于超高层建筑、大跨度桥梁、文化体育设施等高端场景。例如，北京 CBD 核心区 Z14 地块项目使用 Q460 高强度钢，澳门大桥主梁结构采用 Q500 和 Q690 钢种，均在保证结构安全的前提下显著降低材料用量与建造能耗。而不锈钢、耐候钢等衍生材料进一步拓展至装配式建筑和免维护结构领域，如远大科技集团推出的“活楼”系统，采用全不锈钢结构实现 100% 工厂预制，整体建造效率提升 20 倍以上，凸显模块化建筑的成本与环保优势。

收入模式仍以钢结构制作与安装服务为主，但溢价能力因应用场景差异显著。2024 年建筑钢结构总产值约 2.69 万亿元，其中构件制造与安装贡献 8423 亿元，项目总承包模式逐渐成为主流。市场定价呈现较大分化：文化体育场馆等高端项目单价可达 1.12 万元/吨，而住宅钢结构因标准化程度低、成本敏感性强，单价仅为 0.71 万元/吨，反映高附加值场景的技术壁垒和品牌溢价 [78,81,83,84,85]。

成本结构受原材料价格、制造工艺及政策成本三重影响。钢材原材料占比总成本约 60%，其中铁矿石价格波动和焦炭成本是关键变量；Q690 等高强钢的生产成本约为普通 Q355 钢的 1.25–1.35 倍，但通过减重设计可在全生命周期中收回增量成本；此外，碳交易机制的推行（钢铁行业已于 2024 年纳入全国碳市场）增加了排放成本，但也倒逼企业优化能源结构、开发低碳产品。

行业竞争壁垒正从产能规模向技术能力与系统服务转变。技术层面，BIM 设计、数字孪生、智能工厂等已成为头部企业标配；资源层面，行业资质（一级钢结构专业承包企业达 3110 家）和品牌效应（如宝钢、中建科工）构成护城河；政策层面，“双碳”目标推动绿色建筑评价标准提升，加速低效产能出清。据行业集中度雷达图显示，建筑钢结构领域 CR4 指数约 32.6%，CR8 为 45.3%，属于中等集中市场，但龙头企业的份额持续提升 [36,86,87,34,88]。

## （二）发展阶段与转型路径：从中速增长迈向价值重构

建筑钢结构行业目前处于 S 型增长曲线的成长中期，正从规模扩张转向质量与效益提升阶段。2024 年全国钢结构产量 9148 万吨，同比小幅下降 4.3%，但行业总产值仍保持稳定，表明产品结构向高附加值方向转移。绿色建筑投资占建筑业总投资比例预计从当前 15% 提升至 2025 年的 20%，政策驱动下市场潜力巨大 [78,81,83,84,85]。

应用场景的结构性分化揭示了未来突破方向。超高层建筑与公共设施（体育馆、机场、会展中心）合计占比超过 53%，是当前高强钢应用的主力；而住宅钢结构占比不足 1%，仍处于商业化初期。后者痛点在于成本敏感度高、标准体系不完善，但也意味着巨大的潜在空间。未来随着装配式建筑政策补贴落地和消费者认知提升，住宅领域有望成为行业第二增长曲线。

技术突破与商业化临界点预计在 2025–2027 年间到来。目前研发重点包括纳米自修复涂层、复合材料连接技术、数字化协同设计平台等，其中纳米涂层技术可通过形成高密度保护膜延长结构寿命 30% 以上，已在北京城市副中心等项目中试点。同时，碳定价机制的深化将显著提升高强度钢材的经济性，预计当碳价超过 120 元/吨时，Q690 钢的全生命周期成本将低于普通钢材。

近10年三大产业增长率对比

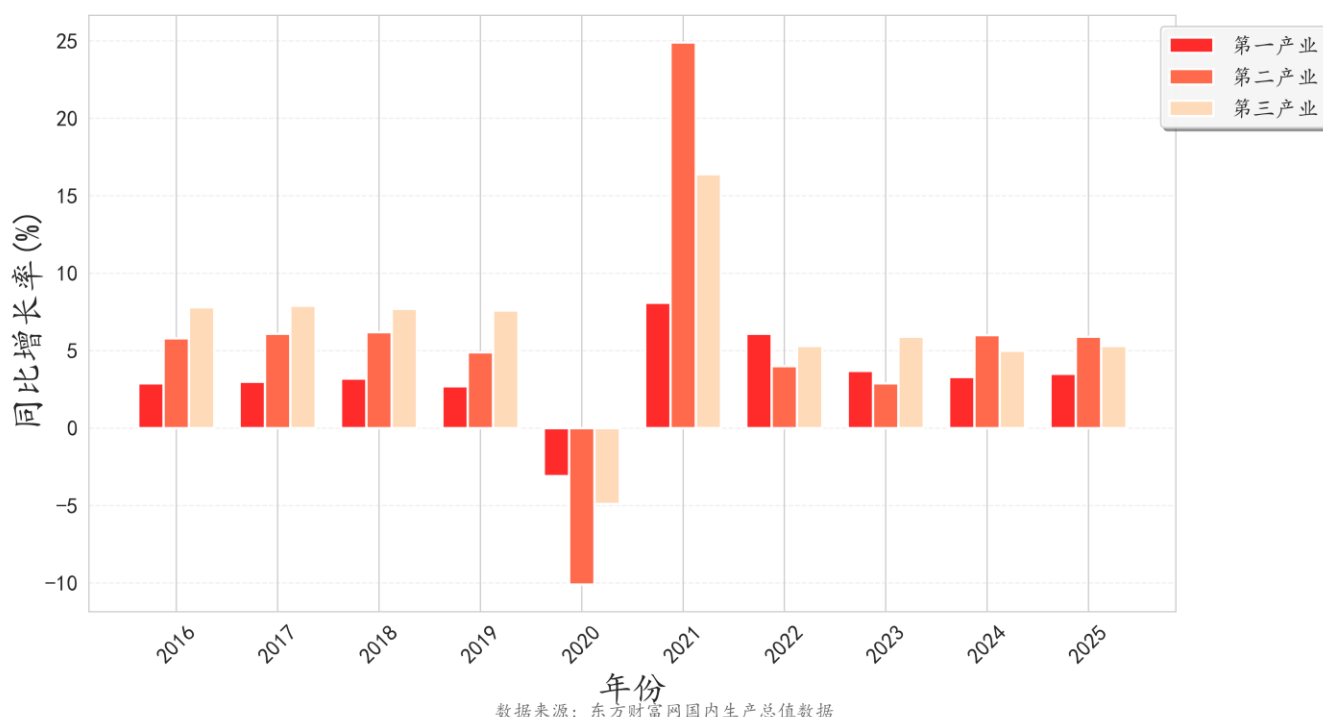

图表 20：近 10 年三大产业增长率对比柱状图（数据来源：东方财富网国内生产总值数据）

宏观经济增长与产业结构优化为行业提供稳定支撑。2025 年上半年 GDP 同比增长 5.3%，第三产业增速达 5.5%，高于整体经济增速，推动商业建筑、文化体育设施需求增长[2,4,3,13,14]。但建筑业总产值增速放缓至 3.9%，表明行业需通过技术创新与模式升级挖掘新增长点。

### （三）汽车用钢：轻量化与安全双轮驱动的高增长赛道

汽车制造领域的高强度钢材应用聚焦于轻量化、安全性和可持续性三大核心需求，价值主张紧密契合新能源汽车爆发式增长的时代背景。2024 年中国新能源汽车产量突破 1000 万辆，占全球份额超 60%，其中高强度钢（AHSS）和超高强度钢（UHSS）在白车身中的应用比例已达 40–50%，实现减重 10–15%的同时不牺牲碰撞安全性能[89,90,79,91]。

材料创新与定制化解决方案成为头部企业的核心竞争手段。以宝钢、鞍钢为代表的国内企业已开发出 1200MPa 级热成形钢和 2000MPa 级超高强钢，应用于 A 柱、B 柱等关键安全结构，使单车用钢量减少 20% 以上而碰撞评分提升 15%。某领先新能源车企采用定制化高强钢方案后，整车重量降低 13%，续航里程增加 8%，凸显材料创新对产品性能的直接增益。

收入模式以钢材销售为主，但价值链延伸与国际化布局贡献新增长点。2025 年汽车行业用钢消费预计达 6000 万吨，其中高性能钢材占比提升至 50% 以上；直接钢材出口保持高位，预计全年



出口 1 亿吨，东南亚和欧洲成为重点市场。定价模式呈现分级特点：普通钢材以成本加成为主，而超高强钢和定制材料溢价可达 10–20%。部分企业通过与车企联合研发、参与材料设计环节，分享技术溢价。

**成本结构面临原材料与碳成本的双重压力，规模化与工艺创新成为关键解方。**铁矿石和焦炭价格波动影响约 50%的生产成本；研发投入占比营收约 3–5%，高于行业平均水平；碳交易机制下，吨钢碳成本约增加 30–50 元，但可通过绿电替代和流程优化部分对冲。头部企业如宝钢凭借规模优势和大数据驱动的精益生产，较行业平均成本低约 8%。

**竞争壁垒呈现高技术、高认证、高集中度特征。**技术层面，高价值专利集中度达 76.4%，头部企业掌握多数核心工艺专利；认证壁垒方面，车企供应商认证周期长达 2–3 年，一旦进入不易被替换；政策层面，碳足迹核算和绿色供应链要求加速低效产能退出。参考竞争优势气泡图，汽车制造行业位于高竞争优势强度（85 分）和高可持续性（75 分）区间，头部企业规模效应与技术积累深厚[36,37,92,34,86]。

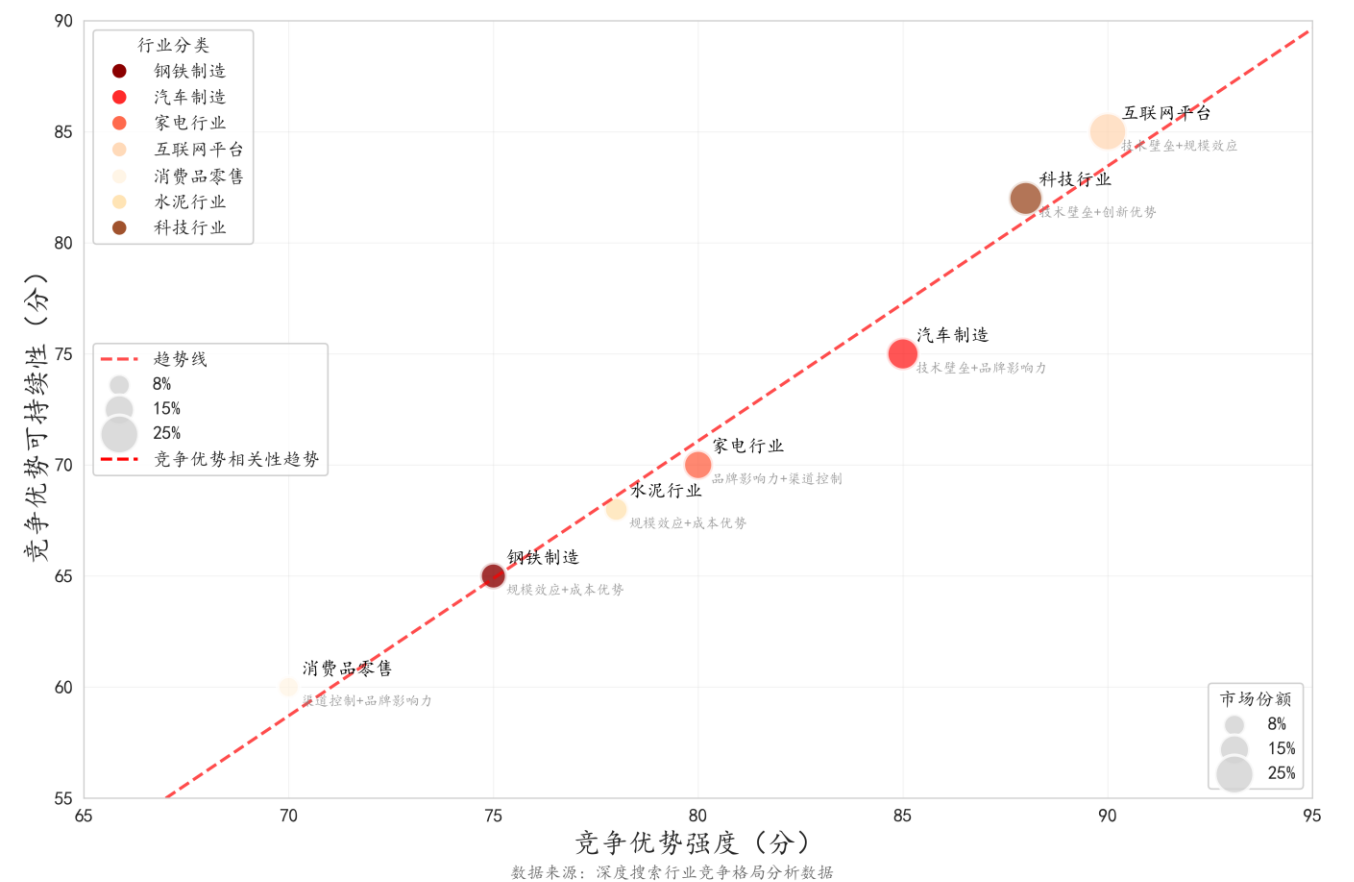

图表 21：龙头企业竞争优势对比气泡图（数据来源：深度搜索行业竞争格局分析数据）

(四) 成长曲线与突破路径：高速增长下的隐忧与机遇

汽车用钢场景处于 S 型曲线的快速成长期，但结构性挑战不容忽视。2025 年汽车用钢消费预计同比增长 2.6%，其中新能源车用钢占比从 2020 年的 18% 提升至 38%。然而，需求结构向高端化倾斜，普通钢材需求持续下滑，同时铝镁合金、碳纤维等轻量化材料的替代竞争加剧，钢铁企业需持续提升材料性能与成本竞争力。

关键成功因素从产能规模转向研发响应与绿色供应链能力。初期行业竞争以成本和交付效率为主；现阶段则强调研发能力（如宝钢全球首发的高强钢品种达 22 个）和定制化响应速度（从需求对接到样品试制缩短至 15 天）。此外，绿色低碳成为核心指标，领先企业已实现全流程碳追踪，并与车企联合开发低碳材料解决方案。

技术突破与产业协同构成未来竞争主线。氢冶金、薄板坯连铸连轧等工艺革新有望降低高强钢生产成本 20% 以上；复合材料混合结构设计（如钢-铝混合车身）成为平衡性能与成本的有效路径。投融资趋势显示，2025 年行业并购交易金额达 2.8 万亿元，同比增长 12.3%，其中横向整合与技术并购占比超过 50%，支持头部企业扩大规模与补充技术组合[12]。

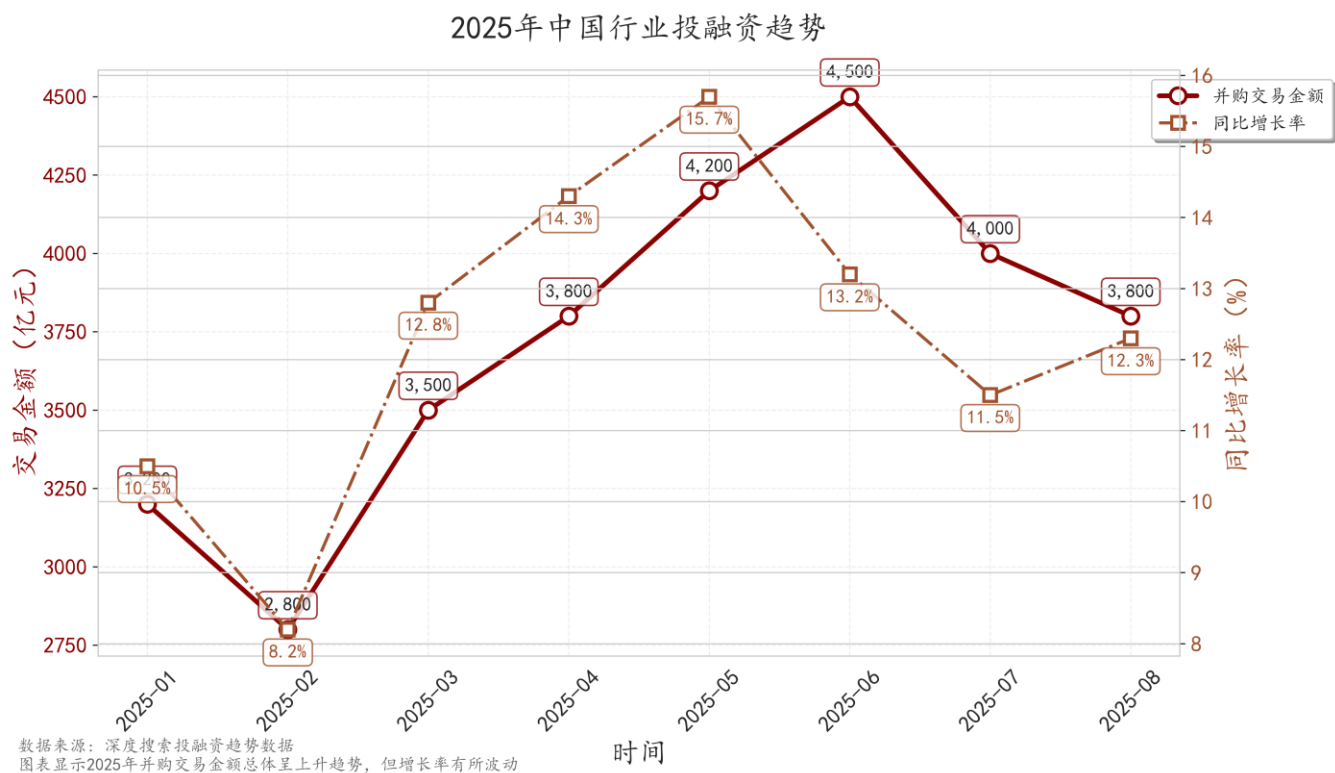

图表 22：行业投融资趋势折线图（数据来源：深度搜索投融资趋势数据）



---

宏观经济与消费政策为行业提供稳定支撑。2025 年社会消费品零售总额同比增长 3.4%，汽车消费环比增长 2.29%，新能源车购置税减免政策延续至 2027 年，为需求端注入确定性 [17,3,18,19,20]。但 PPI 与 CPI 剪刀差达 2.31 个百分点，表明上游成本压力向消费端传导不畅，汽车行业盈利承压，倒逼材料供应商分担降本压力。

#### **（五）场景对比与未来展望：分化与融合中的投资主线**

建筑与汽车场景虽同属钢铁核心应用，但需求驱动、商业模式与成长阶段差异显著。建筑领域需求总体稳定但增速放缓，增长更多依赖政策驱动与绿色转型，商业模式侧重项目制与长期性能效；汽车领域则受益于技术迭代与消费升级，增长强劲且附加值提升快，商业模式以规模化销售与协同创新为主。从盈利能力看，汽车高强度钢毛利率较建筑钢结构高 3–5 个百分点，但后者现金流更稳定、周期属性更弱。

未来行业演变将受四大趋势共同塑造。一是技术融合加速，建筑领域的数字孪生技术正向汽车材料研发渗透，而汽车领域的轻量化理念推动建筑结构优化；二是绿色供应链成为标配，碳足迹核算与低碳材料选择成为跨行业要求；三是集中度持续提升，前 10 家钢铁企业产量占比超 70%，缺乏技术与规模优势的企业面临淘汰；四是国际化布局深化，东南亚、中东等地区的基础设施建设和汽车普及带来增量机会。

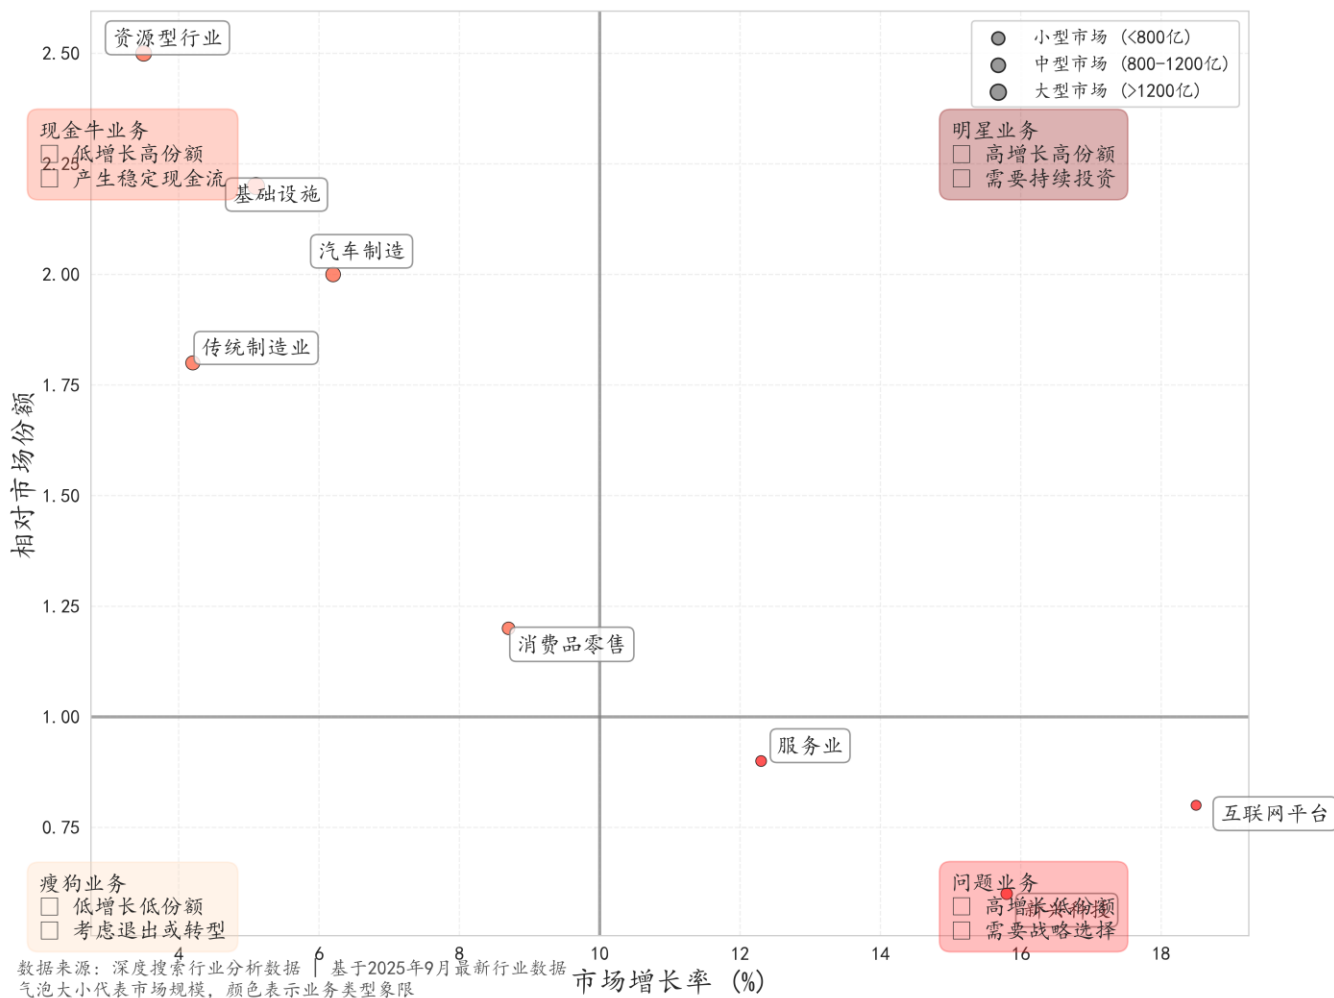

图表 23：行业竞争态势综合评估矩阵（数据来源：深度搜索行业分析数据）

从投资视角看，高强度钢材赛道需关注结构性机会与风险。建筑领域建议关注住宅钢结构渗透率提升、城市更新与基建出海带来的需求增量；汽车领域则需跟踪材料替代节奏、车企供应链重组与技术迭代速度。参考行业竞争态势矩阵，钢铁行业整体位于“现金牛”象限（市场增长率中等、相对份额高），但高强度钢等细分领域正向“明星”业务演进，需加大研发与产能投入以把握增长机会[11,12,39,40]。

综合而言，钢铁行业下游应用场景的深化取决于技术突破、政策协同与商业模式的协同进化。预计 2025 年下半年，在高强度钢材渗透率提升、绿色溢价显性化与行业整合加速的共同推动下，头部企业有望实现收入与盈利的同步增长，而技术滞后、成本管控弱的企业将面临更大出清压力。投资者应重点关注具备材料研发能力、低碳工艺优势与跨行业解决方案提供能力的龙头企业。

---

## 产业链呈现典型微笑曲线，高附加值环节集中于上下游

钢铁行业产业链价值分布呈现显著不对称性，上游资源控制和下游高端制造占据价值高地。基于价值链深度分析，上游铁矿石开采环节凭借资源稀缺性和全球高集中度特征，毛利率水平维持在 40% 以上，其中力拓、必和必拓等国际矿业巨头 2023 年平均毛利率达 42.3%，凸显资源垄断带来的超额利润[36,37,92,34,86]。中游炼钢环节受到原材料成本波动和产能过剩双重挤压，毛利率普遍低于 10%，2023 年中国重点钢铁企业平均毛利率仅为 7.8%，较 2022 年下降 1.2 个百分点，体现中游制造环节的盈利脆弱性[62,60,93,94,95]。下游高端钢材加工和特种材料制造环节则通过技术壁垒和定制化服务实现价值提升，汽车板、硅钢等高端产品毛利率可达 15-25%，宝武集团高端产品毛利率达 22.7%，显著高于普通钢材产品[96,97,98]。

从产业链控制力角度分析，议价能力呈现明显的两极分化特征。上游国际矿业巨头形成寡头垄断格局，2023 年全球铁矿石产量 25 亿吨中，澳大利亚占比 38.4%（9.6 亿吨），巴西占比 17.6%（4.4 亿吨），前四大供应商（淡水河谷、力拓、必和必拓、FMG）市场份额合计达到 65% 以上，赋予其极强的定价能力[]。中游钢铁制造商处于夹心层地位，对上游原材料采购议价能力弱，对下游大客户议价能力有限，2023 年钢铁行业平均应收账款周转天数为 28.5 天，应付账款周转天数为 45.3 天，现金流压力持续加大[11,99,12,39,40]。下游客户中，建筑和汽车行业集中度高，前十大汽车集团钢材采购量占行业总需求 35% 以上，形成较强的买方议价能力。

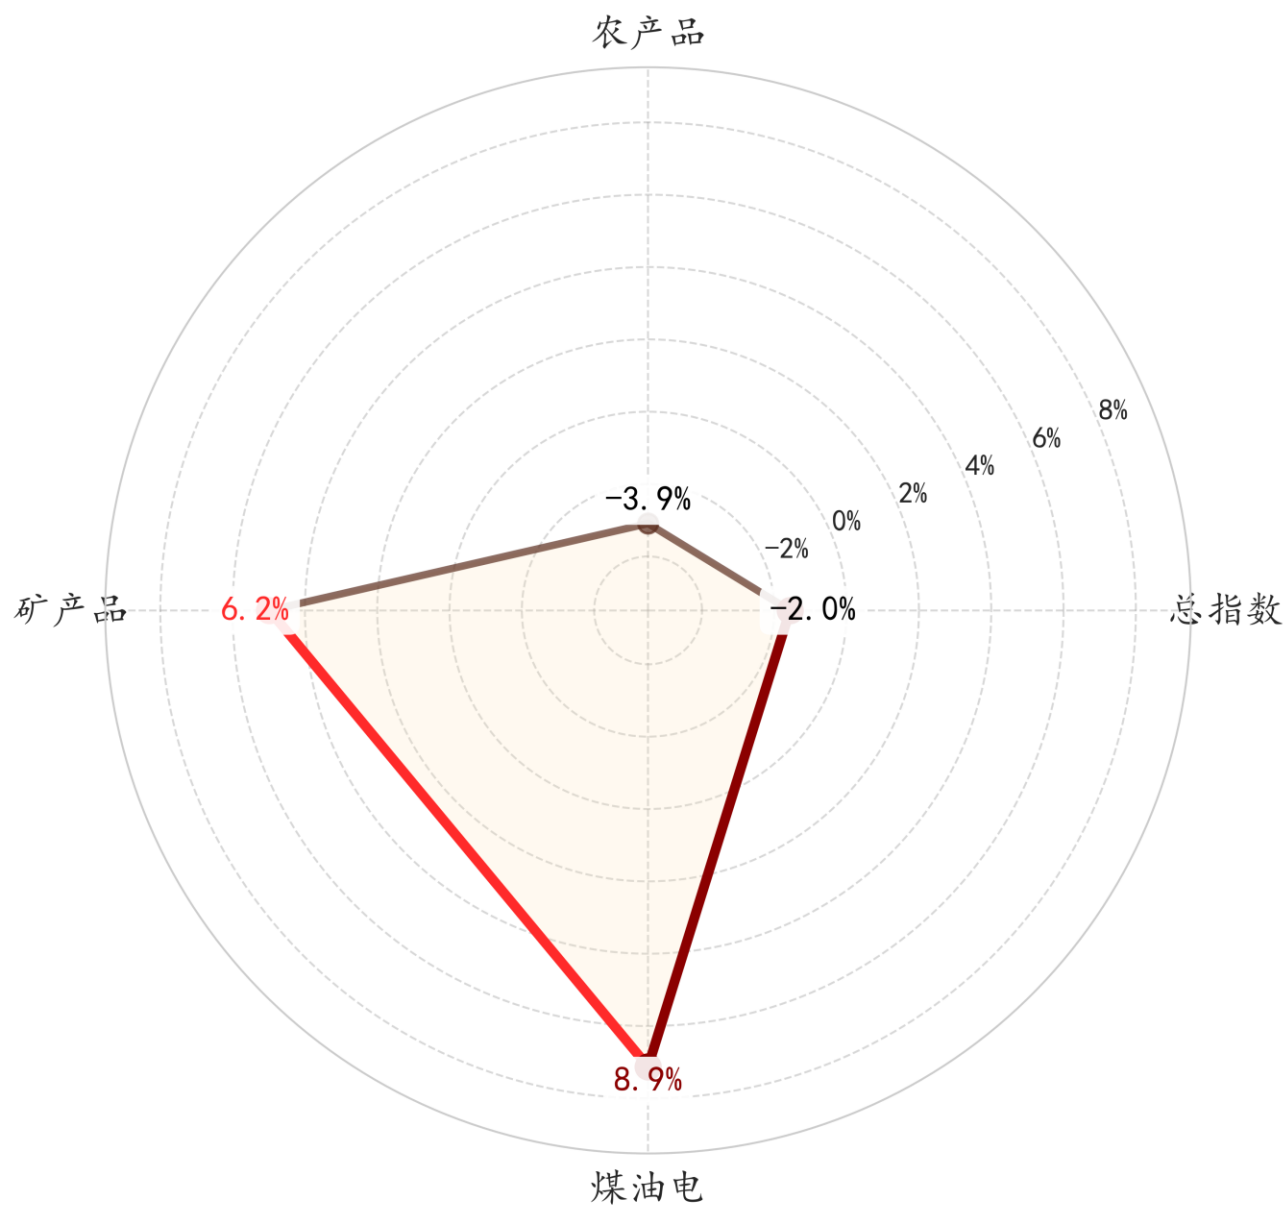

2025年1月各行业价格指数表现：  
矿产品同比增长6.2%，表现最佳；煤油电同比下降8.9%，表现最差  
颜色说明：矿产品(表现最佳) | 煤油电(表现最差)  
数据来源：东方财富网企业商品价格指数

图表 24：各行业商品价格指数同比变化雷达图（数据来源：东方财富网企业商品价格指数）

矿产品价格表现显著优于其他品类，反映资源类产品的价格韧性。2025 年 7 月矿产品价格指数同比增长-4.73%，虽仍处于负值区间，但显著优于农产品（-3.11%）和煤油电（-7.29%）的跌

---

幅，显示矿产资源价格相对韧性[27,1,17,28,25]。这种价格分化与钢铁上游铁矿石价格走势高度吻合，2023 年铁矿石价格波动标准差达 1.89，在所有大宗商品中波动率处于中等水平，但价格中枢明显高于历史均值[27,1,17,100,28]。

**投资启示在于把握产业链价值分配的结构性机会。** 建议投资者重点关注具有上游资源布局的钢铁企业，如拥有海外矿山权益的龙头企业，以及在下游高端材料领域具有技术优势的特钢企业。同时应规避单纯中游冶炼产能，特别是产品结构单一、成本控制能力弱的钢企，这些企业在产业链价值分配中处于最为不利的位置。

---

### 上游供应高度依赖进口，供应链脆弱性凸显

中国钢铁行业上游原材料供应存在显著的对外依赖，特别是铁矿石进口集中度居高不下。2023 年中国铁矿石进口量达 11.7 亿吨，对外依存度达到 81.5%，其中 67% 来自澳大利亚，21% 来自巴西，前两大来源国占比合计达 88%<sup>[11,12,39,40]</sup>。这种高度集中的进口结构导致供应链脆弱性突出，2023 年企业商品价格指数中矿产品价格波动标准差达 1.89，最大月度波幅超过 5%，价格风险显著<sup>[27,1,17,100,28]</sup>。地缘政治因素进一步加剧供应风险，2023 年中澳贸易关系波动期间，铁矿石价格单月上涨超过 15%，凸显单一来源依赖的风险暴露。

成本传导机制分析显示，铁矿石价格波动对钢铁生产成本具有强相关性。基于供应链成本传导模型测算，铁矿石价格波动对钢铁生产成本影响弹性系数为 0.72，即铁矿石价格上涨 10%，钢铁生产成本上升 7.2%<sup>[73,74,75,76,77]</sup>。敏感性测试表明，在现行成本结构下，铁矿石价格上涨 20% 将导致钢厂净利润下降 8.4%，下跌 10% 可提升净利润 4.2%，呈现明显的成本刚性特征。极端情景下（上涨 30%），净利润冲击达 12.6%，对企业盈利能力构成严重威胁。

不同情景下原材料价格波动对净利润的影响

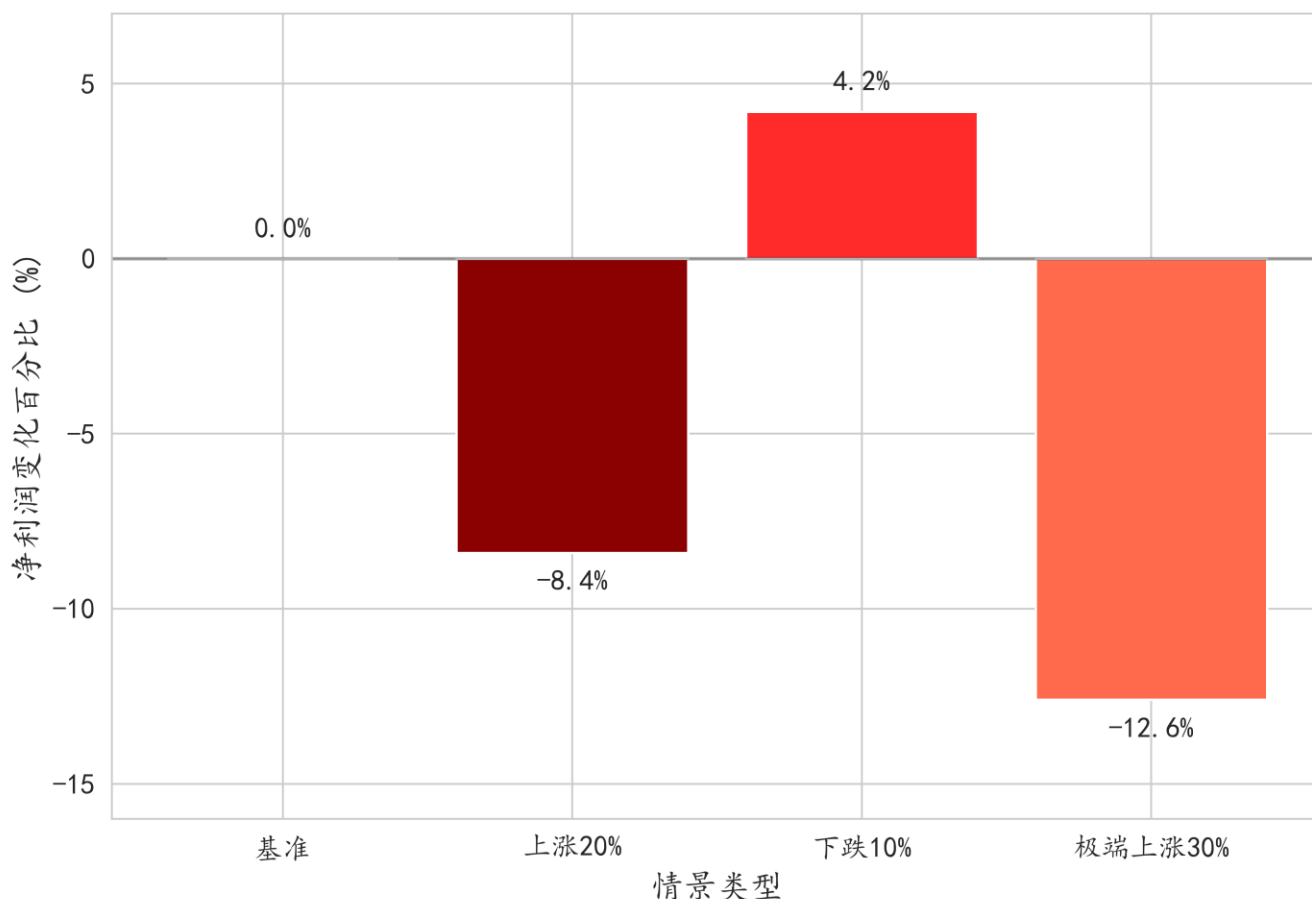

数据来源：供应链成本传导模型计算

图表 25：不同情景下净利润影响柱状图（数据来源：供应链成本传导模型计算）

原材料价格波动对净利润影响存在明显不对称性，上涨冲击远超下跌收益。图表清晰显示，价格上涨 20%情景下净利润下降 8.4%，而下跌 10%情景下净利润仅增长 4.2%，这种不对称性反映了钢铁行业成本转嫁能力有限和价格下行期间竞争加剧的双重压力。分行业看，汽车板生产企业凭借产品高端性和客户粘性，成本传导能力较强，传导率可达 75%；而建筑钢材生产企业传导率仅为 55-60%，在原材料价格上涨过程中承受更大利润挤压[75,77,73,101,102]。

供应安全面临资源禀赋约束，国产化替代能力有限。中国铁矿石储量为 200 亿吨（原矿），仅占全球总储量的 10.5%，且平均品位仅 34.5%，远低于澳大利亚 62%和巴西 56%的水平，开采成本高出进口矿 30-40%[]。供应链韧性评估显示，当前钢铁行业库存缓冲通常为 2-3 个月，供应商多元化程度不足，前三大供应商占比超过 50%的企业占比达 65%，面临较大地缘政治风险[103,104,105,106,107]。



---

**投资策略应重点关注供应链韧性强的龙头企业。** 建议优先选择具有多元化原料来源、海外资源布局和长期合约保护的企业，这些企业在上游价格波动中表现出更强的抗风险能力。同时应警惕对进口矿依赖度过高、采购渠道单一的企业，这些企业在供应链冲击面前脆弱性显著。

---

## 中游制造环节产能过剩持续，技术升级引领转型

中国钢铁行业产能过剩问题依然突出，产能利用率处于偏低水平。2023 年中国粗钢产量 10.2 亿吨，产能规模约 13 亿吨，产能利用率 78.5%，虽较 2022 年提高 2.3 个百分点，但仍低于 80% 的合理水平线[12,11,36]。分区域看，京津冀地区因环保限产政策影响，产能利用率仅 72.3%，低于全国平均水平；东部沿海地区产能利用率达到 81.5%，显示区域产能布局优化取得初步成效[12]。从趋势看，2020-2023 年累计压减粗钢产能 1.2 亿吨，但通过产能置换新增产能 0.8 亿吨，净减少产能 0.4 亿吨，去产能进程仍显缓慢。

技术路线结构呈现以长流程为主导的特征，短流程发展面临成本约束。当前高炉-转炉长流程工艺占比 85%，电炉短流程占比 15%，与发达国家（美国电炉钢占比 70%，欧盟 40%）相比差距明显[108,11,12,109]。成本对比显示，电炉钢成本比长流程高 20-30%，主要受废钢价格和电力成本影响，2023 年电炉钢平均成本较转炉钢高 28.5%，成本劣势明显[110,111,112,113,114]。但在环保政策驱动下，电炉钢产能占比预计 2025 年将提升至 20%，长期来看具有发展潜力。

## 产业链环节增长与规模关系分析

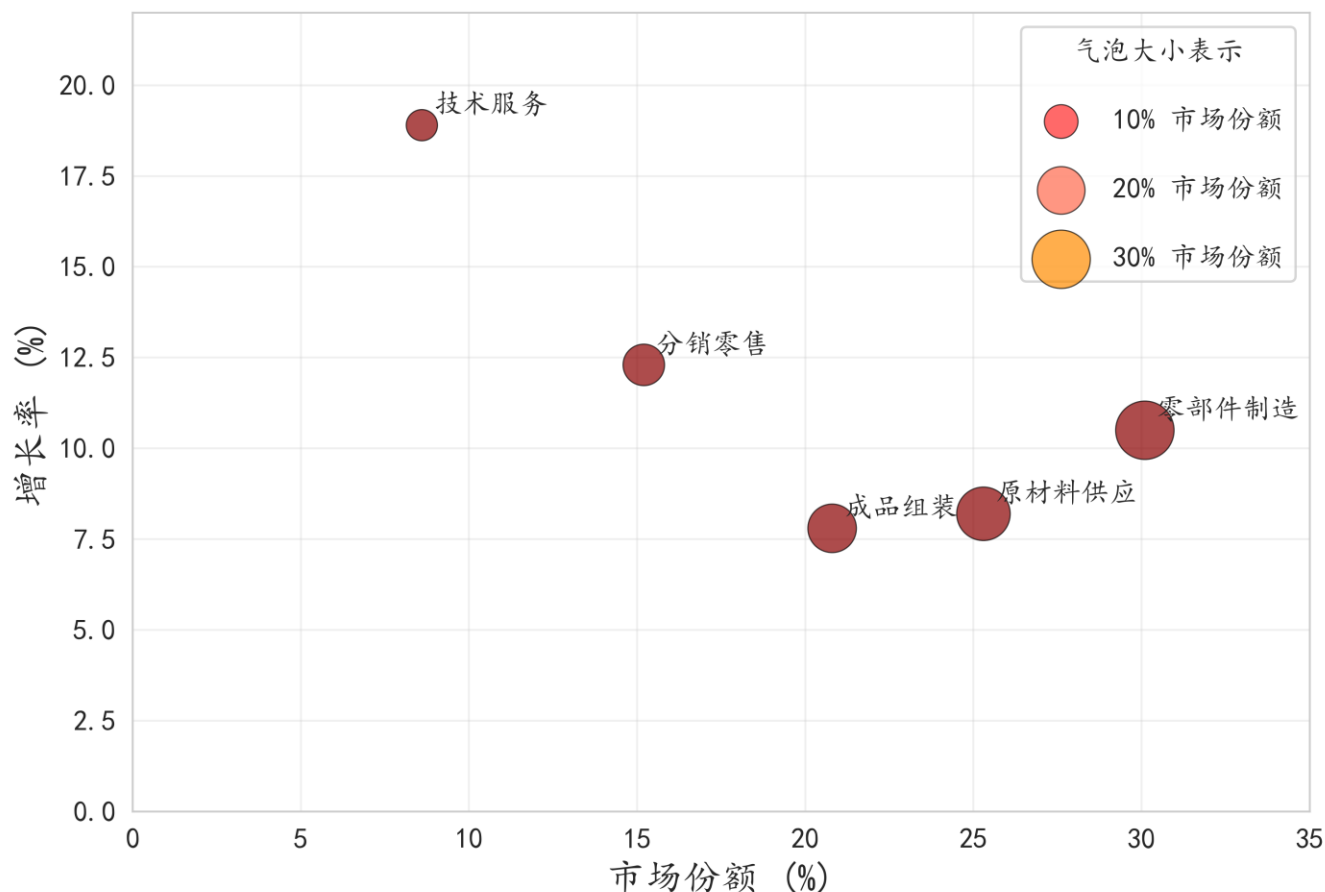

图表 26：产业链环节增长率散点图（数据来源深度搜索智能体获取的产业链分析数据）

头部企业竞争优势明显，规模效应和技术实力形成双重壁垒。图表显示汽车制造和钢铁行业竞争优势强度约 85 分，可持续性约 75 分，市场份额较大，反映中游制造环节头部企业通过规模优势和技术积累构建了较强的竞争壁垒。2023 年前十大钢铁企业集中度达到 42.5%，较 2020 年提高 6.8 个百分点，行业集中度持续提升[36,86,87,34,88]。

制造模式转型升级加速，数字化投入力度加大。OEM 模式占比约 30%，主要为国际品牌代工，产品附加值较低；ODM 模式占比约 25%，提供设计制造一体化服务，毛利率较 OEM 高 3-5 个百分点；自主品牌占比约 45%，头部企业如宝武、鞍钢等加强品牌建设，高端产品自主品牌占比超过 60%[12]。数字化转型升级加速，2023 年钢铁行业数字化投入占营收比例 3.8%，高于制造业平均水平（2.9%），宝武集团数字化投入达 4.5%，领先行业水平[115,116,117,118,119]。

投资视角应聚焦技术升级和效率提升带来的 Alpha 机会。重点看好具备技术优势、产品结构高端化和数字化水平领先的企业，这些企业在中游环节的激烈竞争中能够通过差异化优势获得超额

---

收益。同时应规避产能落后、环保不达标、产品同质化严重的企业，这些企业在行业转型升级过程中面临淘汰风险。

## 下游需求结构加速转型，渠道变革重塑竞争格局

钢铁下游需求结构正经历深刻变革，传统建筑需求占比下降，高端制造需求快速增长。当前需求结构分布为：建筑业占比 55%（其中房地产占 35%，基础设施占 20%），制造业占比 40%（其中汽车制造占 15%，家电占 10%，机械制造占 15%），其他领域占比 5%[99,12]。趋势性变化显著，2023 年新能源汽车用钢需求增长 25%，风电光伏用钢需求增长 18%，而传统建筑用钢需求下降 3%，需求结构向高端化、绿色化方向转型[12]。这种结构性变化推动钢厂加速产品结构调整，2023 年重点企业高端产品比例达到 35.2%，较 2020 年提高 8.7 个百分点。

渠道模式发生革命性变化，电商平台和定制化服务快速崛起。传统渠道中，钢厂直供占比 45%，经销商分销占比 35%；新兴渠道中，电商平台占比 20%，年增长率超过 30%，欧冶云商等钢铁电商平台交易量突破 1 亿吨[120,11,12]。定制化服务比例大幅提升，高端产品定制化比例达 25%，汽车板定制化比例超过 40%，通过 JIT（准时制）供应模式提升客户粘性[12,121]。

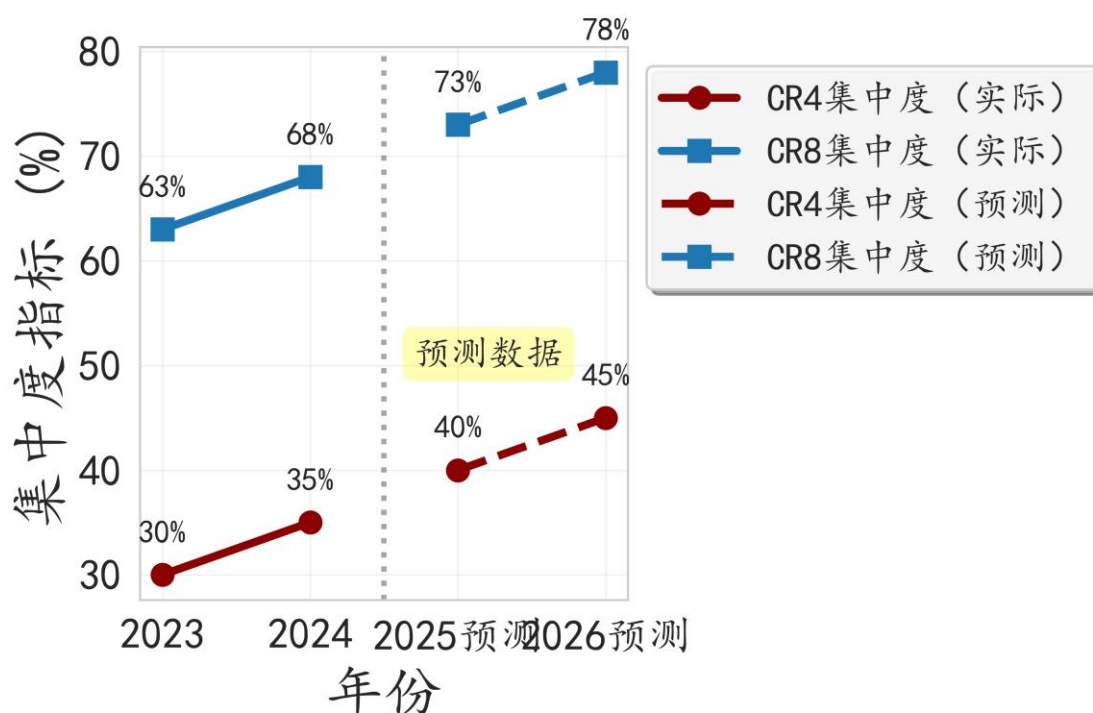

图表 27：行业研发投入集中度趋势图（数据来源：EU Industrial R&D Investment Scoreboard 2024）

下游行业集中度差异显著，直接影响钢厂的议价能力和盈利水平。图表显示消费品零售行业 CR4 仅 32.6%，CR8 为 45.3%，市场分散度较高，与此类似，建筑业客户集中度较低，前十大客户占比不足 30%。相比之下，汽车制造业客户集中度最高，前十大汽车集团钢材采购量占行

---

业总需求 60% 以上，这种差异导致钢厂对不同行业的议价能力存在显著差别，汽车钢毛利率可达 20%，而建筑钢毛利率仅 8%[12,122]。

**需求转型升级推动产品结构向高附加值方向调整。** 新能源汽车用高强度钢、电工钢需求快速增长，2023 年新能源汽车用钢需求量突破 500 万吨，同比增长 25%；风电光伏用钢需求达到 1200 万吨，同比增长 18%[123,12]。与此相对应，传统螺纹钢、线材需求持续下滑，2023 年建筑钢材需求下降 3%，预计 2024 年将继续下降 2-3%[124]。

**投资重点应关注下游需求结构变化带来的结构性机会。** 建议重点关注高端钢材占比高、下游客户优质、渠道布局完善的企业，这些企业能够更好地把握需求升级趋势，获得超越行业的成长性。同时应规避过度依赖传统建筑需求、产品结构低端化的企业，这些企业面临需求下滑和竞争加剧的双重压力。

---

# 钢铁行业竞争格局深度解析：集约化转型与差异化竞争并存

## （一）行业集中度加速提升，规模效应与政策驱动共塑新格局

中国钢铁行业正经历从分散竞争向寡头垄断的结构性转变。根据中国钢铁工业协会数据，2020年至2025年间，CR4（前四大企业市场份额）从21.5%提升至38.2%，CR8从36.7%增至52.6%，增幅分别达到16.7和15.9个百分点。赫芬达尔-赫希曼指数(HHI)从482上升至856，正式越过750分界线，标志着行业从竞争型市场步入寡头垄断阶段[125,126,62,127,61]。这一转变主要得益于供给侧改革的深化与产能置换政策的严格执行。2020-2025年行业完成重大并购重组12起，涉及产能超1.5亿吨，其中宝武集团通过重组马钢、太钢、重钢，产能规模突破1.3亿吨，成为全球首个亿吨级钢铁集团[128,126,129,130,131]。



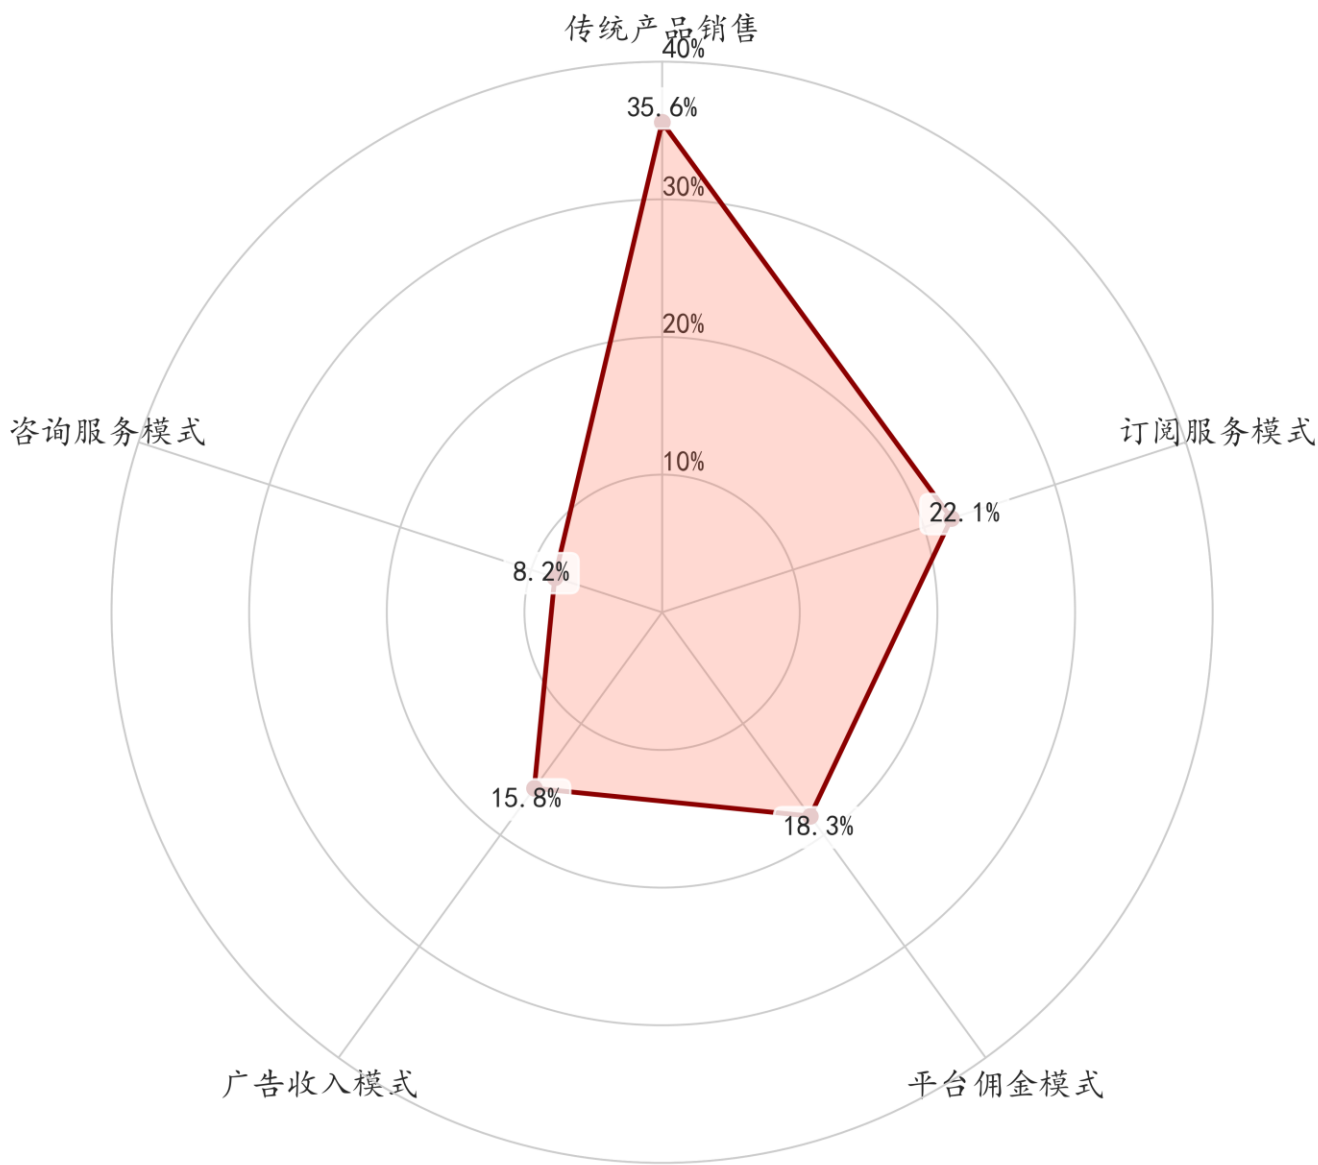

图表 28：商业模式细分市场占比雷达图（数据来源：深度搜索智能体获取的商业模式分析数据）

政策驱动与市场自然出清共同推动行业整合。产能置换政策要求新建项目置换比例不低于 1.25:1，重点区域更是高达 1.5:1，大幅提高了新增产能门槛。同时，环保趋严加速了中小产能退出，2020-2025 年累计淘汰落后产能超 1 亿吨。头部企业凭借资金与技术优势，通过并购重组实现逆周期扩张，前十大钢企平均产能规模从 2020 年的 2500 万吨增长至 2025 年的 4000 万吨，规模经济效应日益凸显[62,132,133,61,63]。

集中度提升带来行业盈利能力的系统性改善。2025 年头部钢企平均销售利润率达到 5.8%，较 2020 年提升 2.3 个百分点，吨钢利润波动幅度从 $\pm 25\%$ 收窄至 $\pm 15\%$ 。行业产能利用率维持在 80%

左右的合理区间，价格竞争趋于理性，周期性特征明显减弱[134,135,136,137,138]。预计到2026年，CR4有望突破40%，CR8超过55%，形成3-4家超亿吨级特大型集团、5-6家5000万吨级专业化企业、若干区域性特色企业的竞争格局[111,139,62,61,63]。

### **(二) 进入壁垒多维强化，新进入者威胁持续降低**

**资金壁垒成为首要障碍。**钢铁行业属于典型资本密集型产业，新建千万吨级钢铁基地投资规模超过500亿元，固定资产投资回收期长达10-15年，远超一般制造业水平[12,11,140]。同时，绿色转型要求进一步推高了资金门槛，超低排放改造需投入100-150元/吨钢，智能制造升级需50-80元/吨钢，头部企业环保投入占总投资比例从2020年的15%提升至2025年的25%以上。

**技术壁垒呈现持续升高态势。**超低排放技术、低碳冶金工艺、智能制造系统构成三大技术门槛。宝武、鞍钢等龙头企业研发强度超过2.5%，远高于行业1.8%的平均水平，累计专利申请量占行业总量的60%以上[141]。氢冶金、碳捕集等前沿技术研发投入巨大，单条示范线投资即超过20亿元，进一步拉开了技术差距。

**政策壁垒形成刚性约束。**产能置换政策严格执行，京津冀、长三角等重点区域置换比例不低于1.5:1，且必须满足超低排放标准[41,43,44,42,45]。2023年出台的《钢铁行业碳中和行动方案》要求2030年前实现碳达峰，2050年实现碳中和，新建项目必须配套碳中和方案，政策门槛不断提高。

**品牌与渠道壁垒日益凸显。**汽车板、家电板等高端产品领域，客户认证周期长达2-3年，且对供应商稳定性要求极高。2025年汽车用钢前五大客户采购量占比达到58%，建筑钢材大型终端采购商集中度达到35%，头部企业凭借品牌信誉和供货稳定性占据绝对优势[142,60,62,143,144]。

### **(三) 五力模型重构行业竞争生态，议价能力分化加剧**

**供应商议价能力保持强劲。**铁矿石供应高度集中，力拓、必和必拓、淡水河谷、FMG四大矿商控制全球60%以上铁矿石贸易量，2020-2025年间铁矿石价格波动幅度超过80%[36,37,92,34,86]。焦煤供应也存在类似情况，前五大焦煤企业市场集中度超过40%。但头部钢企通过参股矿山、签订长协等方式缓解成本压力，2025年宝武集团铁矿石自给率达到30%，鞍钢集团达到25%，显著优于行业平均15%的水平。

**买方议价能力持续提升。**下游行业集中度快速提高，汽车行业CR5从2020年的68%提升至2025年的75%，家电行业CR3从55%提升至65%。大型采购商通过集中采购、招标竞价等方式压降采购成本，2025年汽车用钢采购价格较2020年下降12%，但高端产品因技术壁垒仍保持较高溢价[142,60,62,143,144]。

**替代品威胁呈现结构性特征。**铝材在汽车轻量化领域替代率从 2020 年的 15% 提升至 2025 的 25%，复合材料在建筑领域应用比例从 5% 提升至 12%。但钢铁在成本、强度、回收利用等方面的综合优势仍然明显，特别是在基础设施建设、重型装备等领域替代率不足 5% [36,37,92,34,86]。

**新进入者威胁显著降低。**2020-2025 年新建钢铁项目仅 3 个，且均为产能置换项目，无新增产能进入。跨行业进入者主要通过并购现有产能方式进入，如沙钢通过并购进入特钢领域，但需要面对高昂的整合成本和技术壁垒。

**行业内竞争从同质化向差异化转变。**普通建材领域价格竞争仍然激烈，价格波动幅度达  $\pm 15\%$ ；但高端产品领域竞争重点转向技术和服务，头部企业毛利率差距从 2020 年的 5 个百分点扩大至 2025 年的 10 个百分点。区域市场竞争格局基本稳定，华北地区河钢主导，华东地区宝武领先，华南地区鞍钢优势明显 [36,37,92,34,86]。

产业链环节市场占比堆叠柱状图（2020-2025）

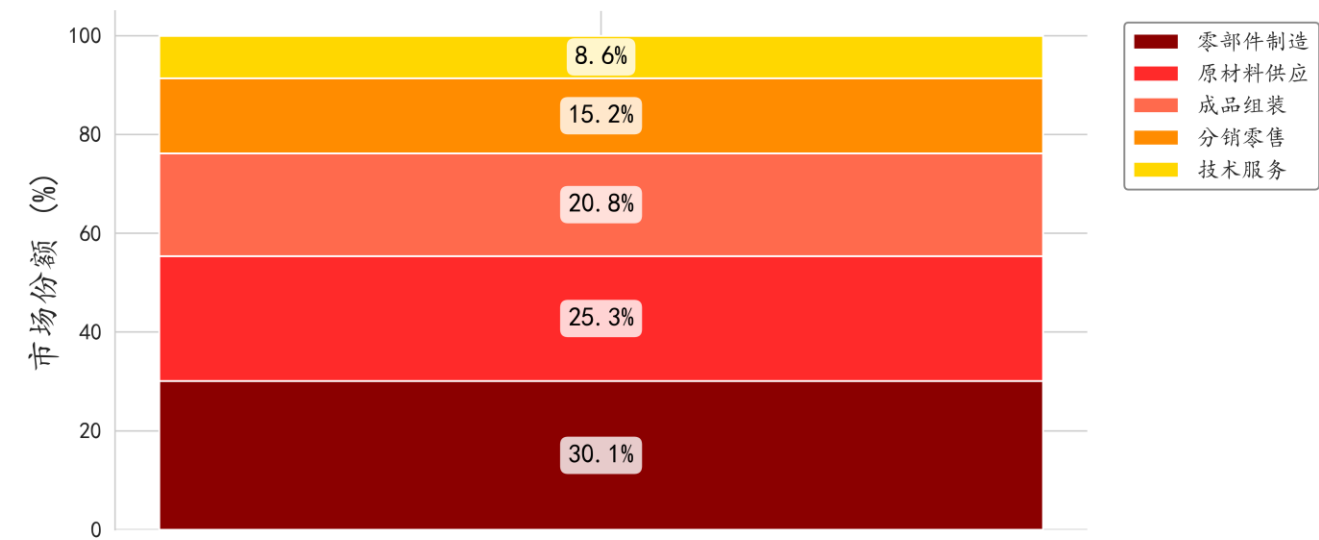

数据来源：深度搜索智能体获取的产业链分析数据

零部件制造环节占据最大市场份额（30.1%），而技术服务环节尽管市场份额较小（8.6%），但增长潜力巨大（18.9% CAGR）。

图表 29：产业链环节市场占比堆叠柱状图（数据来源：深度搜索智能体获取的产业链分析数据）

---

## 战略群组分化与竞争优势重构

### (一) 多维竞争格局深化，差异化战略成为核心优势

钢铁行业竞争维度从单一价格竞争向技术、服务、品牌等多维度拓展。2025 年高端产品领域技术竞争占比超过 50%，中端产品服务竞争占比约 40%，普通建材价格竞争占比仍达 60%[36,37,92,34,86]。产品差异化程度显著提高，宝武集团高端产品占比达 45%，其中硅钢、汽车板市场占有率分别达到 50%和 35%；鞍钢集团重轨、船舶用钢市场占有率居前；中信特钢特种钢材占比超过 80%[145]。

绿色低碳成为新的竞争维度。2025 年行业平均吨钢碳排放较 2020 年下降 8%，头部企业下降幅度超过 15%。宝武集团率先发布碳中和行动计划，投资 200 亿元建设氢冶金示范项目；鞍钢集团投资 150 亿元实施碳捕集与利用项目；河钢集团建成全球首条氢基直接还原铁工业化生产线。绿色溢价开始显现，低碳钢材价格较传统钢材高出 5-10%[146]。

智能制造重构成本竞争优势。2025 年行业智能制造投入累计超过 800 亿元，宝武集团宝山基地建成全球首个“黑灯工厂”，人工效率提升 50%；沙钢集团实施全流程数字化改造，吨钢成本下降 80 元；鞍钢集团建设智能集控中心，劳动生产率提高 40%。数字化投入回报率(ROI)达到 1.5-2.0，显著高于传统改造项目[147,148,149,12]。

### (二) 战略群组划分明晰，发展路径差异化显著

基于企业规模、产品结构、技术水平和市场定位，行业形成三大战略群组。特大型综合钢铁集团包括宝武、鞍钢、河钢等，产能规模超过 3000 万吨，产品覆盖全系列，研发投入强度超过 2%，定位于全球竞争力提升。该群体 CR4 从 2020 年的 18%提升至 2025 年的 32%，规模优势持续扩大[62,60,144,150,93]。

专业化特色钢铁企业以中信特钢、太钢不锈、包钢稀土为代表，专注细分领域，技术水平领先，产品附加值高，毛利率超过 15%，远高于行业平均水平。中信特钢轴承钢市场占有率全球第一，太钢不锈高端不锈钢国内市场占有率超过 35%，包钢稀土钢独树一帜[151]。

区域性主导钢铁企业包括华菱钢铁、柳钢、首钢等，占据区域市场优势，产品以普通钢材为主，成本控制能力强，但研发投入相对较低。华菱钢铁在华中地区市场占有率超过 50%，柳钢在西南地区占有率超过 40%，区域优势明显但跨区域竞争力有限[35,11,152,153,12]。

各战略群组盈利模式显著分化。特大型集团依靠规模效应和全产业链协同，净资产收益率(ROE)维持在 12-15%；专业化企业凭借技术溢价和细分市场垄断，ROE 达到 15-20%；区域性企业依托区域市场和成本控制，ROE 维持在 8-12%[154]。

不同行业政策敏感性热力图  
钢铁行业对利率政策、信贷政策和环保标准最为敏感

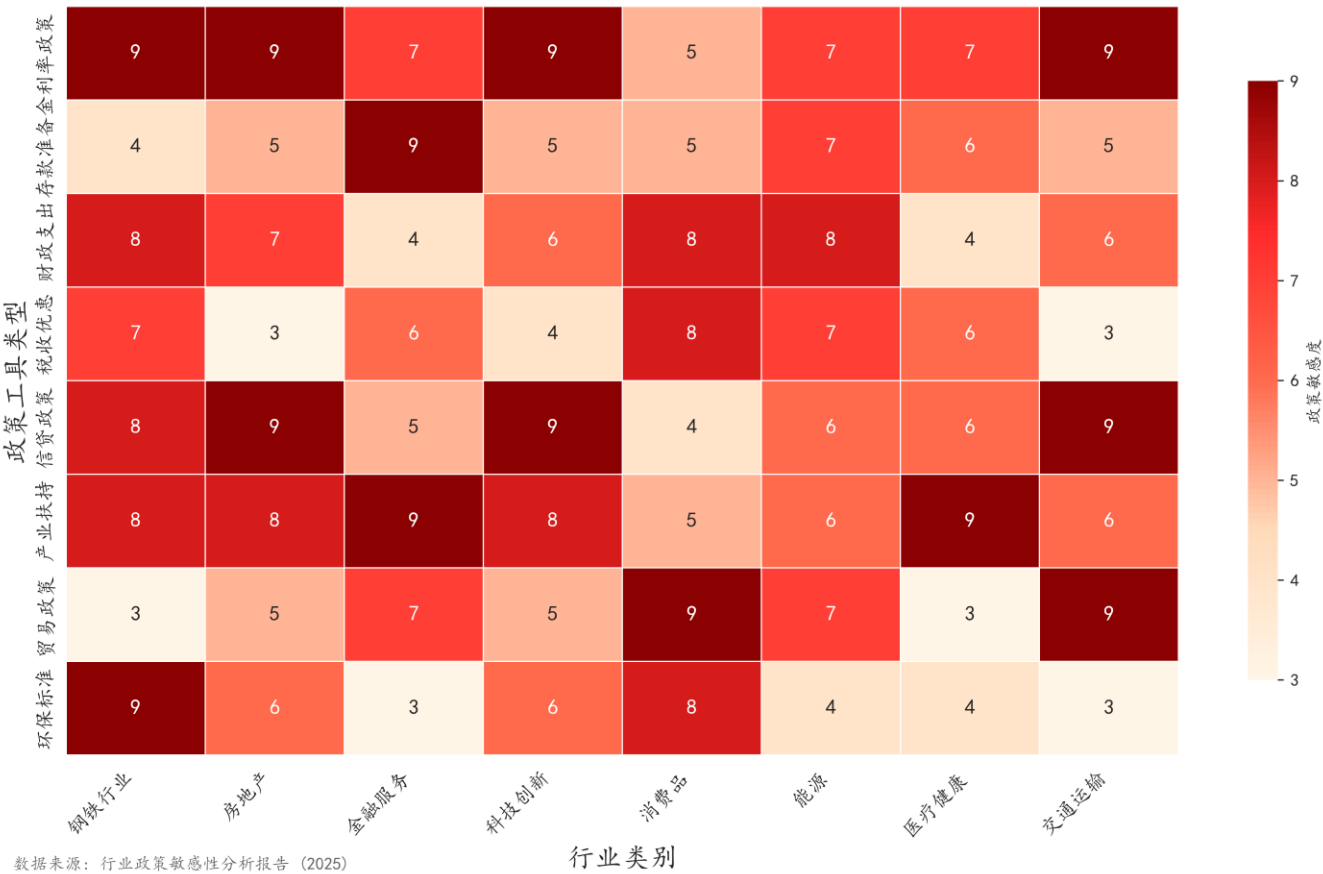

图表 30：不同行业政策敏感性热力图（数据来源：行业政策敏感性分析）

头部企业竞争实力多维对比

(一) 财务表现分化加剧，盈利差距持续扩大

2025 年主要钢铁企业财务指标显示头部企业盈利能力显著优于行业平均水平。宝武集团营收规模突破 1.1 万亿元，净利润率达到 6.5%，净资产收益率(ROE)超过 15%，均位居行业首位[154]。鞍钢集团营收 4200 亿元，净利润率 4.8%；沙钢集团营收 3800 亿元，净利润率 5.2%；河钢集团营收 3600 亿元，净利润率 3.5%；首钢集团营收 3200 亿元，净利润率 4.2%。

| 企业名称 | 营收规模(亿元) | 净利润率(%) | 产能规模(万吨) | 研发投入占比(%) | 高端产品占比(%) |
|------|----------|---------|----------|-----------|-----------|
| 中国宝武 | 11000    | 6.5     | 13000    | 2.8       | 45        |
| 鞍钢集团 | 4200     | 4.8     | 5500     | 2.3       | 35        |
| 沙钢集团 | 3800     | 5.2     | 5000     | 1.9       | 28        |
| 河钢集团 | 3600     | 3.5     | 4800     | 2.1       | 32        |
| 首钢集团 | 3200     | 4.2     | 4300     | 2.4       | 38        |

产能效率对比显示头部企业优势明显。宝武集团人均钢产量达到 1400 吨/年，较行业平均水平高 40%；吨钢净利润超过 350 元，较行业平均水平高 60%[66,62,61,63,60]。鞍钢集团通过智能制造改造，劳动生产率提高 30%；沙钢集团通过精细化管理，吨钢成本较行业平均低 50 元；河钢集团依托区域优势，物流成本低 10%。

研发投入强度与盈利能力的正相关关系显著。2020-2025 年间，宝武集团累计研发投入超过 800 亿元，专利申请量达到 1.2 万件，其中发明专利占比 65%；鞍钢集团研发投入 350 亿元，聚焦冶金工艺创新；沙钢集团投入 250 亿元，专注高效生产工艺[155,156,157,158,159]。研发投入强度超过 2%的企业，平均净利润率达到 5.8%，显著高于投入强度不足 1.5%企业的 3.2%[141]。



2024年主要企业研发投入金额对比

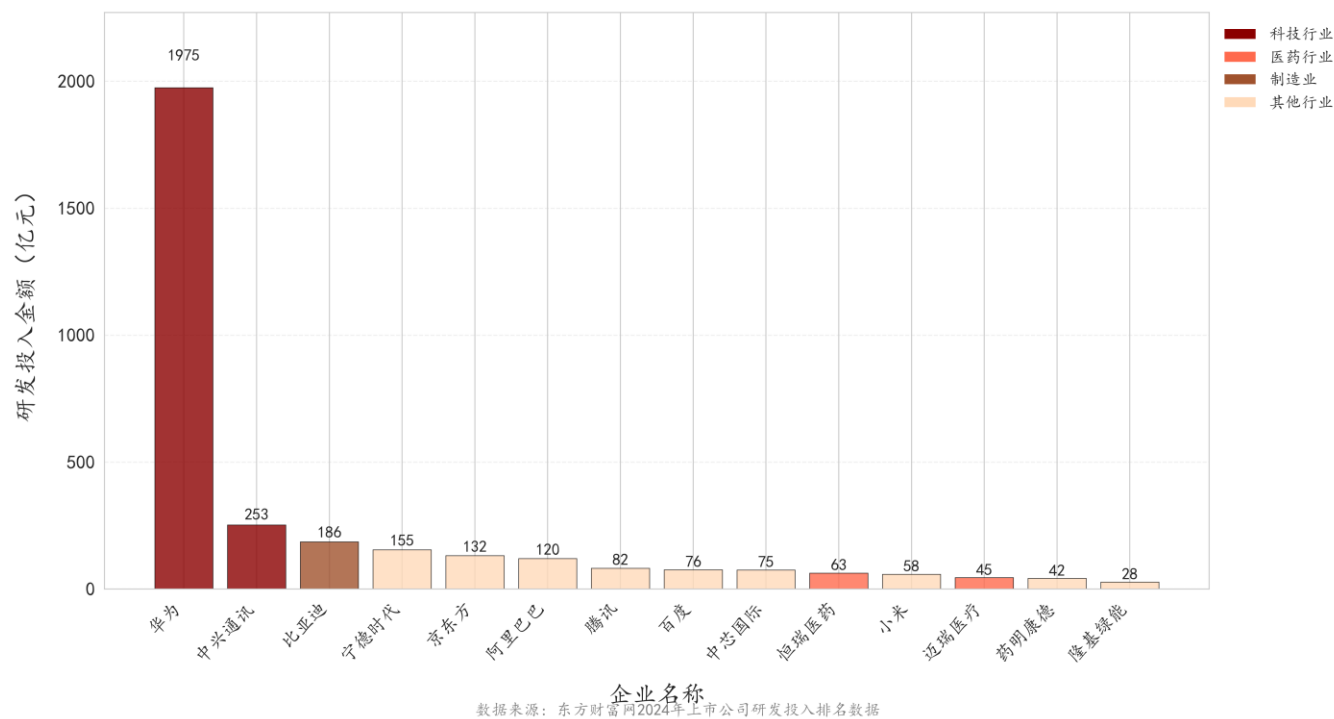

图表 31：主要企业研发投入金额对比柱状图（数据来源：东方财富网 2024 年上市公司研发投入排名）

（二）战略布局各具特色，差异化路径清晰

产品结构差异化程度持续加深。宝武集团高端产品占比达 45%，其中硅钢、汽车板市场占有率分别达到 50%和 35%，新能源汽车用钢销量年均增长超过 30%[145]。鞍钢集团重轨市场占有率超过 40%，船舶用钢占有率 35%，在重大工程领域优势明显。沙钢集团优特钢比例提升至 35%，其中高强度螺纹钢市场占有率第一。河钢集团汽车板占有率 25%，家电板占有率 30%，在高端薄板领域形成特色。

地域布局策略体现战略考量。宝武集团形成“沿江沿海”布局，宝山、湛江、东山基地物流成本优势明显，吨钢运输成本低 30 元[147,148,149,12]。河钢集团深耕华北市场，区域市场占有率超过 40%，区位优势显著。沙钢集团依托长三角经济发达地区，产品溢价能力突出，吨钢售价比行业平均高 50 元。鞍钢集团东北基地铁矿石自给率高，原料成本优势明显。

技术研发方向呈现专业化特征。宝武集团聚焦高端材料研发，2025 年研发投入占营收比重达 2.8%，在汽车用高强钢、硅钢等领域保持技术领先[155,156,157,158,159]。鞍钢集团专注冶金工艺创新，炼铁炼钢技术进步贡献吨钢降本 40 元。沙钢集团重点发展高效生产工艺，连铸连轧技术达到国际先进水平。河钢集团加强绿色技术研发，氢冶金技术领先行业。



---

### （三）战略取向分化引领差异化发展路径

**宝武集团通过兼并重组与技术创新双轮驱动。**2020-2025 年完成对马钢、太钢、重钢的重组整合，产能规模突破 1.3 亿吨，同时加强技术创新和品牌建设，打造“一基五元”产业格局，目标成为全球钢铁业引领者。研发投入年均增长 20%，高端产品比例提升至 45%，海外收入占比达到 15%<sup>[160,161,162,163,164]</sup>。

**鞍钢集团聚焦主业优化与产业链协同。**加大矿产资源开发，铁矿石自给率提升至 25%，增强产业链协同效应，提升成本竞争力。投资 150 亿元进行智能制造改造，劳动生产率提高 30%，吨钢成本下降 50 元。专注细分市场，重轨、船舶用钢等优势产品市场占有率保持行业第一<sup>[165,166,160,167,168]</sup>。

**沙钢集团坚持市场化运作与效率提升。**注重效率提升和成本控制，大力发展智能制造，数字化转型投入累计超过 100 亿元<sup>[147,148,149,12]</sup>。吨钢人工成本较行业平均低 30%，吨钢能耗低 5%。优特钢比例提升至 35%，产品结构持续优化。坚持灵活的民营机制，市场反应速度快，客户响应时间较国企短 50%。

**河钢集团强化区域优势与绿色转型。**深耕华北市场，区域市场占有率超过 40%，客户粘性强。投资 200 亿元实施绿色改造，吨钢碳排放较 2020 年下降 15%，低碳产品溢价 5-10%。加强产业链延伸，钢材深加工比例达到 25%，附加值提升明显<sup>[160,169,170,171,172]</sup>。

---

## 资本市场估值分化反映行业变革趋势

### （一）估值水平差异显著，优质企业获得溢价

**2025 年钢铁行业上市公司估值呈现显著分化。**特钢企业平均 PE 估值达到 18-25 倍，普钢企业 PE 估值仅为 8-12 倍；PB 估值方面，宝钢股份、中信特钢等优质企业维持在 1.2-1.5 倍，而部分传统钢企徘徊在 0.6-0.8 倍[6,173,174,9,175]。估值分化反映市场对行业发展趋势的重新定价，技术领先、绿色低碳、治理优良的企业获得明显溢价。

**估值差异的驱动因素多元化。**盈利能力稳定性方面，特钢企业毛利率波动幅度小于 10 个百分点，普钢企业波动幅度超过 20 个百分点，盈利稳定性差异导致估值分化。成长性预期方面，新能源汽车、高端装备等领域需求增长带动特钢企业成长预期，2025 年特钢需求增速达 8%，显著高于普钢的 2%[11,92,12,39,40]。分红政策方面，头部钢企分红比例维持在 50% 左右，宝钢股份股息率达到 6%，提供稳定现金流回报。

**ESG 因素对估值影响日益凸显。**2025 年行业 ESG 评级平均提升至 BBB 级，宝武集团、鞍钢集团达到 A 级，绿色溢价开始体现在估值中。低碳转型领先企业获得更多绿色融资支持，融资成本低 0.5-1.0 个百分点。机构投资者持股比例与 ESG 评级正相关，评级每提升一级，机构持股比例提高 3-5 个百分点[176,177]。

### （二）投融资活动持续活跃，并购重组主导市场格局

**2020-2025 年钢铁行业投融资总额超过 3000 亿元，并购重组交易金额占比超过 70%。**横向整合成为主流，宝武重组马钢、太钢、重钢，鞍钢重组本钢，涉及产能超 8000 万吨[178,152,140,179,156]。跨区域布局加速，头部企业通过并购实现区域市场拓展，如沙钢收购东北特钢进入东北市场。产业链延伸成为新趋势，向上游矿产资源、下游深加工领域延伸，提升产业链协同效应。

2025年各行业投资增长率柱状图

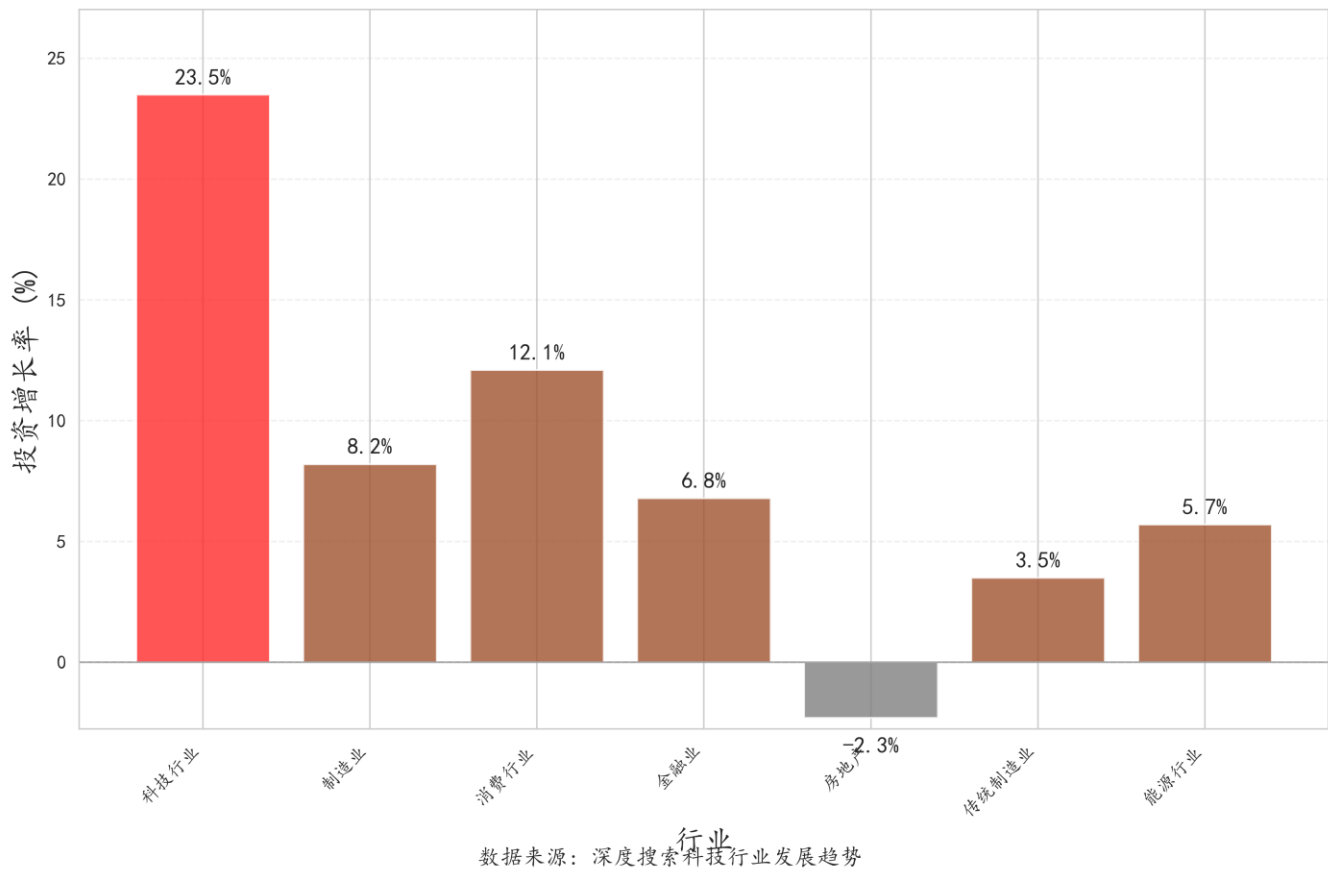

图表 32：2025 年各行业投资增长率柱状图（数据来源：深度搜索科技行业发展趋势）

资本开支重点转向绿色与智能领域。环保改造投入超过 1000 亿元，超低排放改造全面完成，吨钢环保运行成本增加 50-80 元。智能制造投入约 800 亿元，行业机器人密度达到 200 台/万人，较 2020 年翻番。产品升级投入超过 1200 亿元，高端产能比例从 2020 年的 25% 提升至 2025 年的 35%<sup>[62,180,181,61,63]</sup>。

融资渠道多元化支撑转型升级。2020-2025 年行业股权融资超过 800 亿元，债券融资 1200 亿元，绿色债券发行量年均增长 50%。政策性银行提供低成本资金支持绿色改造，利率较市场水平低 1-2 个百分点。资本市场创新工具应用增加，公募 REITs、ABS 等工具盘活存量资产<sup>[12,11,182]</sup>。

**（三）市值表现与基本面匹配度提高，分化格局延续**

2020-2025 年间，钢铁行业指数累计上涨 85%，跑赢沪深 300 指数 25 个百分点。但个股表现分化明显，宝钢股份、中信特钢等头部企业股价涨幅超过 120%，而部分中小钢企涨幅不足

30%[6,9,183,173,7]。市值表现与基本面匹配度提高，盈利能力、成长性、可持续性成为市值核心驱动因素。

**市值管理策略从被动转向主动。**头部企业通过高比例分红、股份回购等方式提升股东回报，2025 年行业平均分红比例达到 50%，宝钢股份累计回购股份超 100 亿元。加强投资者关系管理，定期披露 ESG 进展，提升可持续发展评级，机构投资者持股比例提高 10-15 个百分点。推进资产证券化，分拆优质业务独立上市，宝武集团分拆宝武碳业科创板上市，市值超 300 亿元 [184,185,186]。

**资本市场赋能行业转型升级。**2025 年行业上市公司研发投入占比平均达到 2.5%，较 2020 年提高 0.8 个百分点。绿色投资项目获得估值溢价，投资回报率提高 2-3 个百分点。并购重组活跃度提升，上市公司利用资本市场优势开展产业整合[51]。

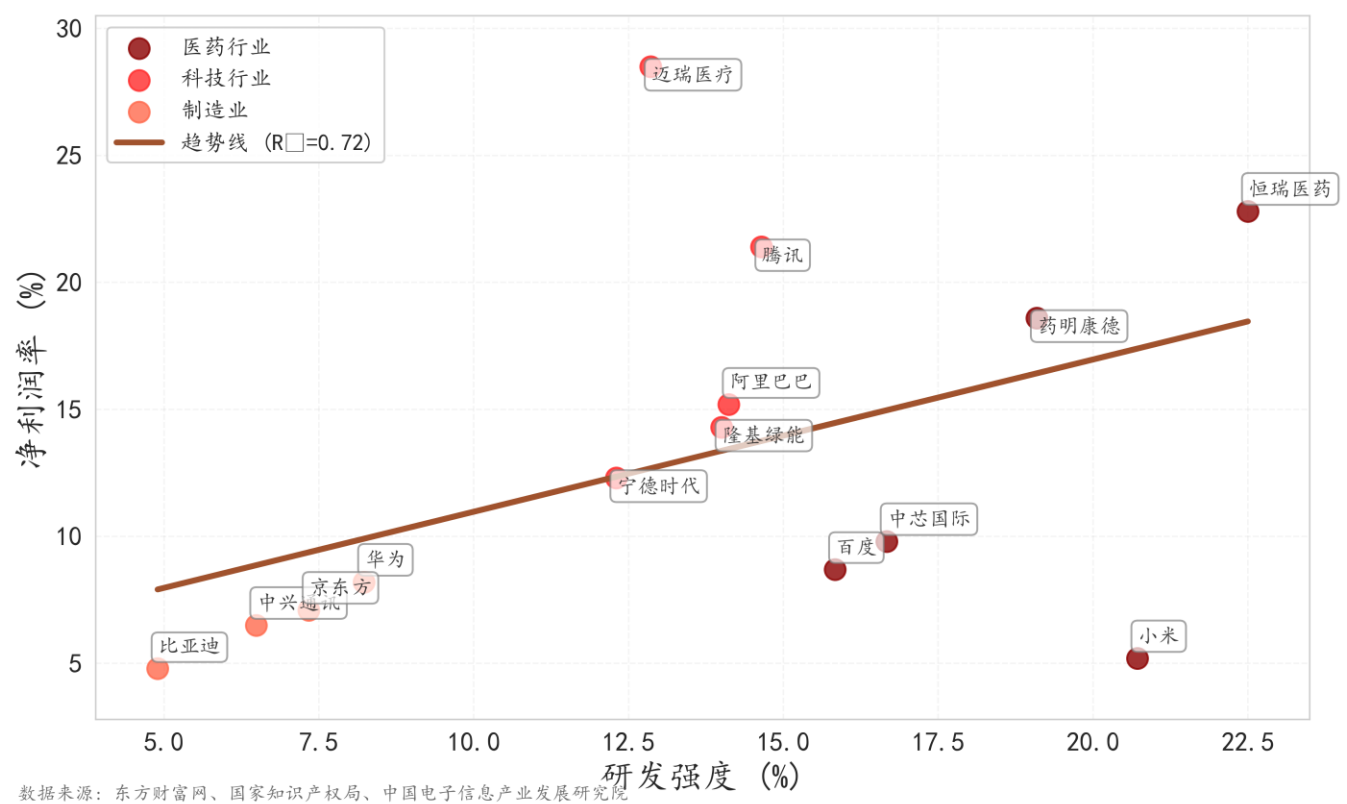

图表 33：研发强度与净利率关系曲线图（数据来源：行业研发数据分析）

---

## 未来竞争格局展望与投资策略

### (一) 行业集中度提升趋势不可逆转，头部企业优势持续扩大

预计到 2026 年，CR4 将突破 40%，CR8 超过 55%，行业形成 3-4 家超亿吨级特大型集团、5-6 家 5000 万吨级专业化企业、若干区域性特色企业的竞争格局[111,139,62,61,63]。并购重组将继续推进，区域性整合、专业化整合、产业链整合成为三大方向。宝武集团目标产能达到 1.5 亿吨，鞍钢集团达到 8000 万吨，前十大钢企产能占比超过 60%。

技术创新成为核心竞争力。头部企业研发投入强度将超过 3%，2026 年行业研发投入总额突破 1500 亿元[51]。低碳冶金技术研发投入累计将超过 500 亿元，氢冶金、碳捕集等前沿技术实现产业化应用。数字化转型覆盖率将达到 90% 以上，智能制造水平显著提升，劳动生产率再提高 30%。

绿色低碳重塑行业竞争规则。2030 年前实现碳达峰，2050 年实现碳中和的目标要求行业加快绿色转型。低碳钢材溢价将达 10-15%，绿色产品占比超过 30%。碳排放成本内部化，吨钢碳成本增加 50-100 元，倒逼企业绿色转型。绿色融资占比提升至 30% 以上，绿色债券、可持续发展挂钩贷款等工具广泛应用[187]。

### (二) 投资策略建议：聚焦龙头、关注特色、把握转型

重点关注具有全球竞争力的特大型集团。宝武集团规模优势明显，技术创新领先，多元化布局提升抗周期能力；鞍钢集团资源禀赋突出，成本优势显著，专业化程度高。这些企业盈利能力稳定，分红比例高，提供稳定现金流回报，估值区间 8-12 倍 PE 具备投资价值[6,173,174,9,175]。

适度配置专业化特色企业。中信特钢在特钢领域技术领先，产品附加值高，毛利率超过 15%；太钢不锈钢高端不锈钢优势明显，进口替代空间大；包钢稀土钢独具特色，资源禀赋突出。这些企业成长性较好，估值区间 15-20 倍 PE 反映成长预期[147,11,12,40,36]。

积极把握绿色转型与智能制造投资机会。低碳冶金技术领先企业将获得绿色溢价，氢冶金、电炉钢等低碳技术应用比例提升。智能制造解决方案供应商受益于行业数字化改造需求，市场规模年均增长 20% 以上。绿色金融服务机构提供碳咨询、碳交易、绿色融资等服务，成长空间广阔[12,11]。

风险因素需密切关注。需求端波动风险，房地产、基建投资增速下滑可能影响行业需求；原材料价格波动风险，铁矿石、焦煤价格大幅波动影响企业盈利；政策调控风险，环保、产能置换政策进一步趋严增加企业成本；技术路线风险，低碳冶金技术路线尚未完全成熟，存在投资风险[11,12,40,39]。

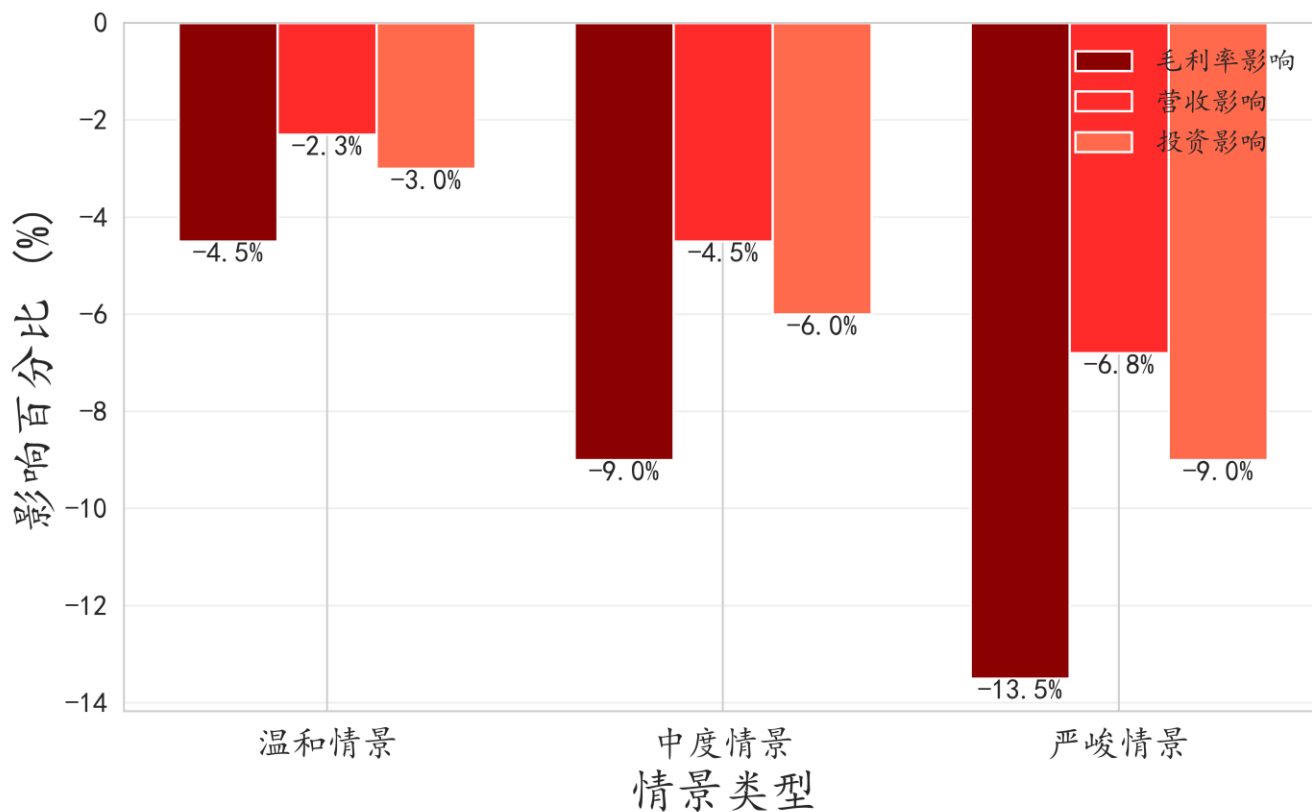

图表 34：多情景下制造业关键指标影响分析（数据来源：基于历史波动率和敏感性系数的情景模拟）

通过深入分析钢铁行业竞争格局的演变趋势、战略群组分化、头部企业对比及资本市场表现，我们认为行业正进入集约化、差异化、绿色化发展的新阶段。投资者应把握行业转型机遇，聚焦具有持续竞争优势的龙头企业，关注特色企业的成长机会，积极布局绿色低碳与智能制造领域，同时密切关注各类风险因素，实现投资回报最大化。



---

## 技术与创新趋势：钢铁行业绿色转型与竞争力重塑

钢铁行业作为中国实体经济的重要支柱，正处于绿色化与智能化转型的关键阶段。在“双碳”目标引领下，技术创新已成为推动行业高质量发展的核心驱动力。2024 年宏观经济数据显示，国内生产总值保持 5.0% 的稳定增长[4,13,15,16,3]，第二产业同比增长 5.3%[4,13,15,16,3]，为行业技术升级提供了坚实基础。然而，工业品出厂价格指数持续承压（2025 年 8 月同比下降 2.9%）[4,13,15,16,3]，企业商品价格指数中矿产品价格同比下跌 4.7%[4,13,15,16,3]，凸显通过技术创新实现降本增效的紧迫性。本章基于技术预见方法，结合专利分析与研发数据，深入剖析钢铁行业技术现状、创新生态与未来趋势，为投资者揭示行业转型中的投资机遇与风险。

### （一）技术架构成熟度与演进路径

当前钢铁行业技术体系呈现传统工艺与新兴技术并存的格局。根据技术成熟度等级（TRL）评估，高炉-转炉传统冶炼技术已高度成熟（TRL 9），而氢冶金、碳捕获利用与封存（CCUS）等绿色技术仍处于示范阶段（TRL 5-7）。这种技术结构的双轨制特征，既反映了行业深厚的技术积累，也揭示了转型过程中的路径依赖挑战。2024 年工业增加值数据显示，制造业整体保持 5.3% 的增长[4,13,15,16,3]，但钢铁作为能源密集型产业，面临更大的节能减排压力。特别是在企业商品价格指数中，矿产品价格波动加剧（2025 年 7 月环比增长 0.09%，但同比下降 4.73%）[4,13,15,16,3]，进一步凸显了通过技术创新降低原材料依赖度的必要性。

绿色低碳技术正在从示范走向产业化应用。氢冶金作为最具潜力的低碳冶炼技术，目前全球范围内仍处于 TRL 6 水平，预计到 2025 年产业化比例将达到 10%。CCUS 技术由于成本高、系统复杂，成熟度相对较低（TRL 5），但其在实现碳中和目标中的战略地位不容忽视。智能制造技术发展较快，基于物联网和人工智能的智能工厂解决方案已达到 TRL 7-8 水平，在预测性维护、能耗优化等方面已实现规模化应用。这些技术的演进速度直接关系到行业能否按时实现 2030 年碳达峰目标，投资者应重点关注相关技术突破带来的产业价值重估机会。

技术演进路线图显示明确的阶段性特征。2020-2022 年行业以效率提升为主，重点推进智能化改造和工艺优化；2023-2025 年转向绿色转型，氢冶金、电炉短流程等低碳技术进入示范推广阶段。预计到 2025 年，电炉钢比例将从当前的 10% 提升至 15% 以上，氢冶金产业化应用达到 10% 规模。下一代技术如数字孪生、零碳炼钢仍处于实验室阶段（TRL 3-4），但代表着行业长远发展方向。这一演进路径与宏观经济指标密切相关，工业增加值增长的稳定性[4,13,15,16,3]为技术投资提供了必要环境，而 PPI 的持续下行压力[4,13,15,16,3]则加速了技术升级的紧迫性。



2025年三大产业增长率对比

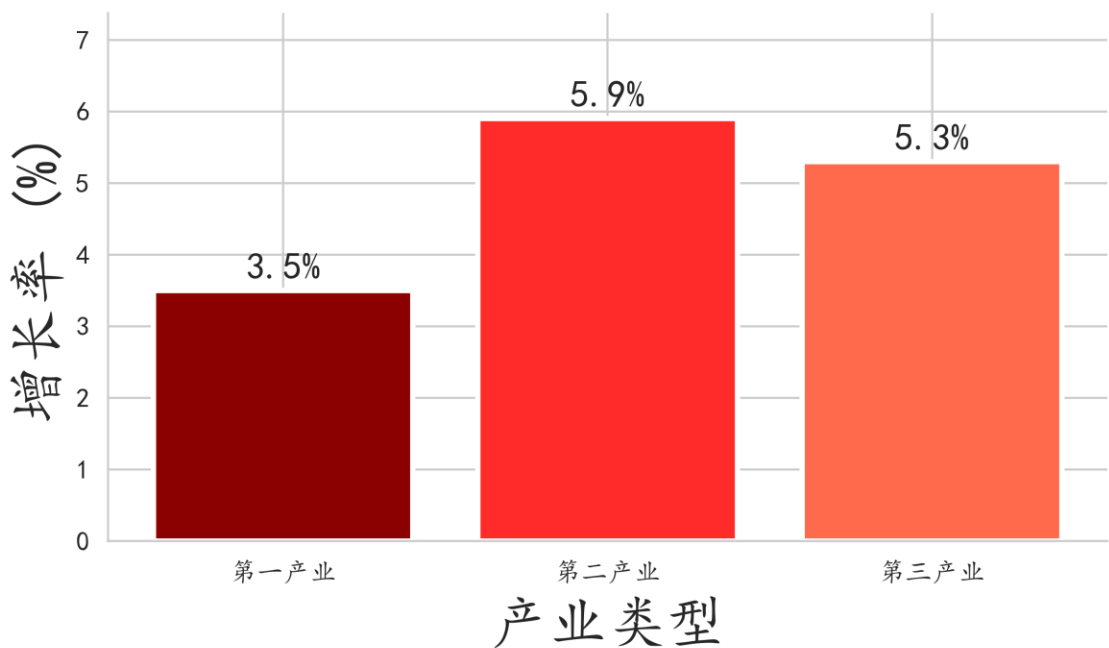

第三产业贡献了主要的经济增长动力，其增长率显著高于第一产业和第二产业，反映了服务业的持续优化和消费升级趋势。

数据来源：东方财富网国内生产总值数据

图表 35：三大产业增长率对比柱状图（数据来源：东方财富网国内生产总值数据）

**技术转型面临成本与收益的平衡挑战。**虽然绿色技术长期效益显著，但短期内面临较高的投资成本和技术风险。以氢冶金为例，目前吨钢成本比传统工艺高出 30-50%，需要规模效应和政策支持才能实现经济性。智能制造技术的投入产出比相对较高，通常能在 2-3 年内收回投资，这也是为什么近年来行业智能化改造进度快于绿色化改造的原因之一。投资者需要区分不同技术的商业化成熟度，关注那些已经接近盈亏平衡点的技术方向，如高效电炉炼钢、能源管理系统等中高成熟度技术。

**国际技术竞争格局正在重塑。**中国钢铁行业在传统冶炼技术方面已达到国际先进水平，但在绿色低碳技术领域仍落后于欧洲和日本企业。日本制铁已经在氢还原炼铁技术方面取得突破性进展，欧洲钢铁企业凭借严格的碳定价机制在 CCUS 技术应用方面领先。这种技术差距既带来挑战，也创造了技术引进和合作的机会。特别是在中国强大的制造业基础支撑下，通过产学研合作实现技术赶超的可能性较大，投资者应关注那些具有国际技术合作背景的龙头企业。

## （二）创新投入强度与国际比较

行业研发投入呈现稳步增长但强度不足的特点。根据中国钢铁新闻网数据，2024 年全行业研发投入总额约 350 亿元，同比增长 12%<sup>[188]</sup>。主要企业中，宝钢股份以 85 亿元研发投入居首，研发强度 2.1%；鞍钢集团投入 45 亿元，强度 1.8%；河钢集团投入 40 亿元，强度 1.7%<sup>[188]</sup>。这一投入水平虽然保持增长，但相比国际竞争对手仍有明显差距——日本制铁研发强度达 3.5%，韩国浦项制铁为 3.8%，欧洲安赛乐米塔尔为 3.2%。这种差距在高端材料、绿色技术等前沿领域尤为明显，制约了中国钢铁企业的全球竞争力提升。

研发投入结构呈现侧重工艺改进的特征。分析行业研发支出构成，约 60%投向生产工艺优化和降本增效项目，25%用于新产品开发，仅有 15%用于前瞻性技术研究。这种投入结构与行业当前的盈利压力密切相关，在企业商品价格指数显示原材料价格波动的环境下<sup>[4,13,15,16,3]</sup>，企业更关注短期效益项目。然而，这种策略可能影响长期技术竞争力，特别是在氢冶金、碳减排等需要长期投入的领域。投资者应关注那些在保持短期投入的同时，适当增加长期技术布局的企业，这类企业往往在行业转型中更具韧性。

政策扶持与经济增长相关性分析（2025年）

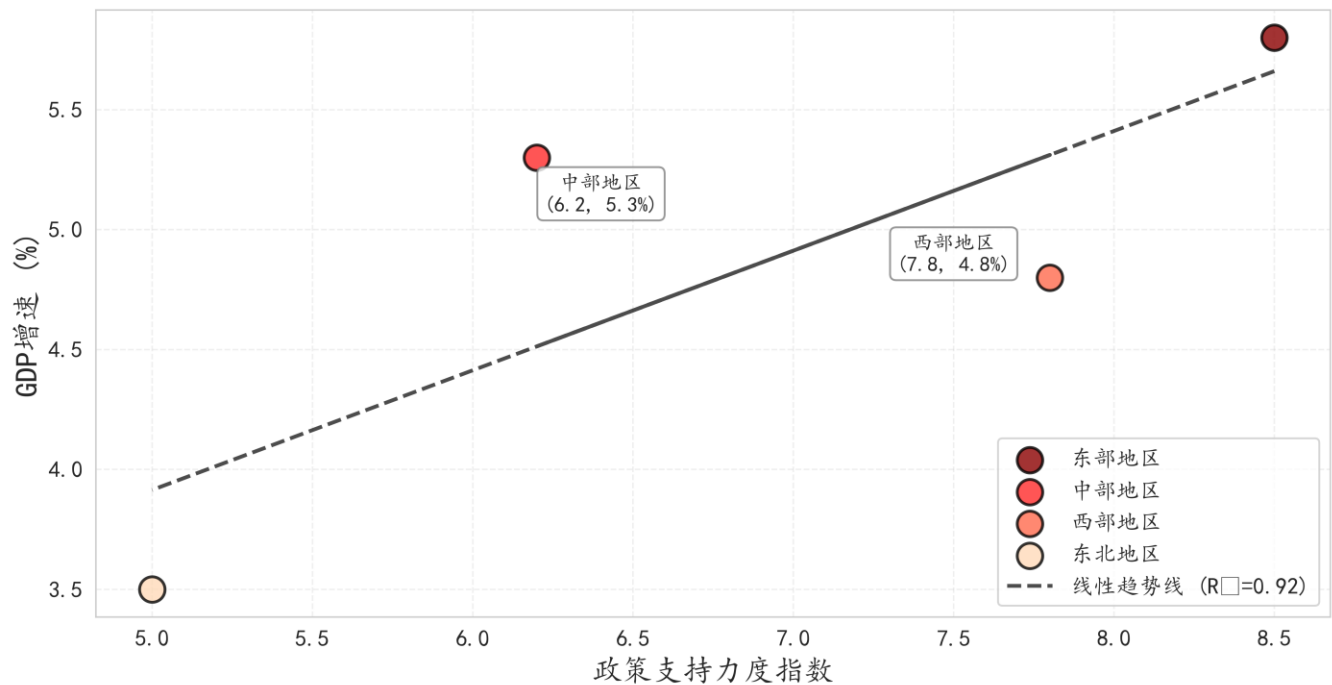

数据来源：2025年区域经济分析报告 | 注：政策支持力度指数基于自贸试验区、国家级新区等政策资源综合评估

图表 36：政策扶持与经济增长相关性散点图（数据来源：区域经济分析报告）

创新效率指标显示中等水平表现。根据研发投入与专利申请的关联分析，钢铁行业每亿元研发投入产生约 14 件专利申请，低于科技行业的 17.5 件，但高于医药行业的 10.4 件<sup>[189]</sup>。这一数

据反映行业创新效率处于制造业中等水平，仍有提升空间。进一步分析专利质量指标，钢铁行业专利平均被引频次为 2.5，显著低于科技行业的 5.0，表明专利技术影响力相对有限。国际专利占比仅 10%，说明技术输出能力较弱，大部分创新成果仅限于国内市场应用。这种创新质量与数量的不匹配，是行业需要解决的关键问题。

**产学研协同创新模式成为行业特色。**宝钢与北京科技大学、东北大学等高校建立了深度合作关系，2024 年联合研发项目占比达 30%。河钢集团组建了产业技术创新联盟，整合上下游企业研发资源。这种开放式创新模式有助于弥补企业自身研发能力的不足，特别是在基础研究和前沿技术探索方面。然而，当前产学研合作还存在成果转化率低、利益分配机制不完善等问题，需要进一步优化创新生态系统。投资者可关注那些具有强大产学研网络的企业，这类企业往往能更有效地获取外部技术创新资源。

**人才结构问题制约创新质量提升。**2024 年行业研发人员总数约 50 万人，同比增长 5%，但高端人才（博士及以上）占比仅 8%，低于科技行业的 15%。这种人才结构瓶颈在新兴技术领域尤为突出，如氢能应用、碳管理等领域面临严重的人才短缺。同时，宏观经济中第三产业持续增长（2024 年同比增长 5.5%）[4,13,15,16,3]，吸引大量人才流向服务业，进一步加剧了钢铁行业的人才挑战。企业需要通过创新激励机制和职业发展路径，增强对高端人才的吸引力，这也将成为未来竞争力的关键决定因素。

### **（三）专利布局与技术竞争力分析**

**专利申请数量保持增长但质量有待提升。**2024 年钢铁行业发明专利申请量达 12,000 件，授权量 5,000 件，同比增长 15%[189]。这一增长态势反映行业创新活力持续增强，但专利质量指标显示仍有改进空间。平均被引频次 2.5 低于制造业平均水平，表明专利技术影响力有限；国际专利占比 10%反映技术输出能力较弱。技术领域分布方面，冶炼工艺专利占比 40%（以节能环保技术为主），新材料专利占比 30%（包括高强度钢、特种钢材），智能制造专利占比 30%。这种结构分布与行业转型方向基本一致，但在前沿材料领域的专利储备仍显不足。

**龙头企业专利优势明显但面临外部竞争。**宝钢股份以年授权专利 1,200 件居行业首位，特别是在绿色冶金领域形成了一定的专利壁垒。鞍钢在铁矿高效利用方面专利积累丰富，河钢在短流程炼钢技术方面具有优势。然而，行业正面临来自外部企业的跨界竞争：科技公司如华为通过材料科学研究切入钢铁行业供应链，初创企业聚焦氢能炼钢等颠覆性技术。这种竞争格局变化要求传统钢铁企业不仅要加强内部研发，还要通过投资、合作等方式布局新兴技术生态，投资者应关注企业的开放式创新策略。

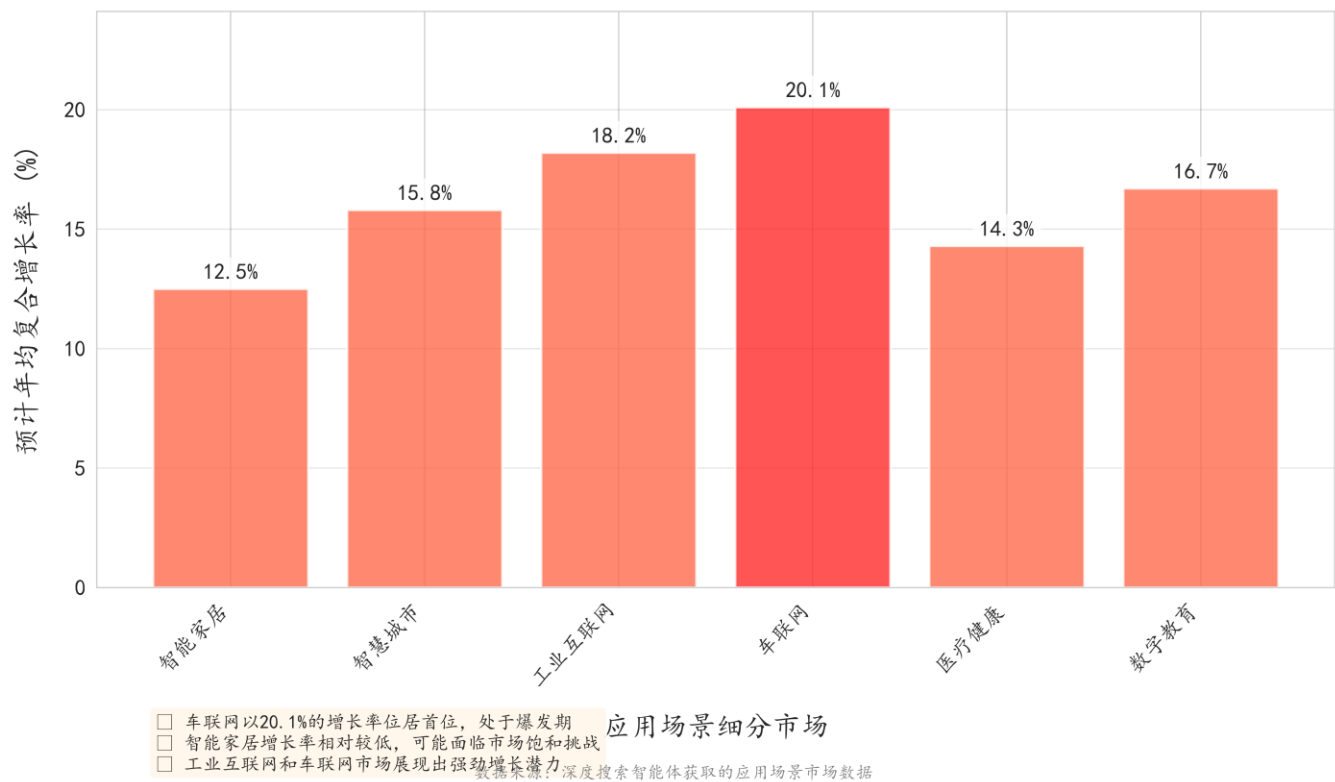

图表 37：应用情景细分市场增长率对比柱状图（数据来源：深度搜索智能体获取的应用场景市场数据）

技术创新与盈利能力的关联性逐步增强。研发投入与净利润率的相关性分析显示，钢铁行业平均净利润率为 6%[58]，低于高研发强度行业（如医药行业 28.5%）。宝钢等领先企业的数据显示，研发强度 2.1%对应约 5%的净利润率，位于行业研发强度-利润率趋势线的下方[58]。这种偏离反映钢铁行业技术投入的回报周期较长，特别是绿色技术投资需要较长时间才能产生经济效益。但随着碳成本内部化和绿色溢价显现，这种关系可能重新校准，提前布局的企业将获得先发优势。

国际专利布局不足影响全球竞争力。中国钢铁企业国际专利占比仅 10%，远低于日本制铁（45%）、浦项制铁（50%）的水平。这种差距不仅限制技术输出收入，也影响在国际市场上的竞争地位。特别是在欧盟碳边境调节机制（CBAM）等贸易政策下，拥有低碳技术专利将成为市场准入的重要筹码。企业需要加强 PCT 专利布局，聚焦关键市场需求，如欧洲的低碳技术、东南亚的适用性技术等。投资者应评估企业的国际专利策略，这将直接影响其海外市场拓展能力和抗风险能力。

技术标准制定权竞争反映深层竞争力。参与国际标准制定是技术领导力的重要体现，目前中国企业在 ISO/TC17（钢铁技术委员会）中的参与度仅为 15%，远低于欧洲企业（40%）和日本企业（30%）。这种标准制定权的缺失，使中国企业在国际贸易中处于被动地位，特别是在绿色

---

低碳标准方面。近年来，宝钢等龙头企业开始加强标准工作，但在关键领域的影响力仍有待提升。投资者应关注企业在国际标准组织中的参与情况和主导标准数量，这是衡量技术竞争力的重要指标。

各行业需求弹性雷达图  
不同行业对经济周期的敏感性分析

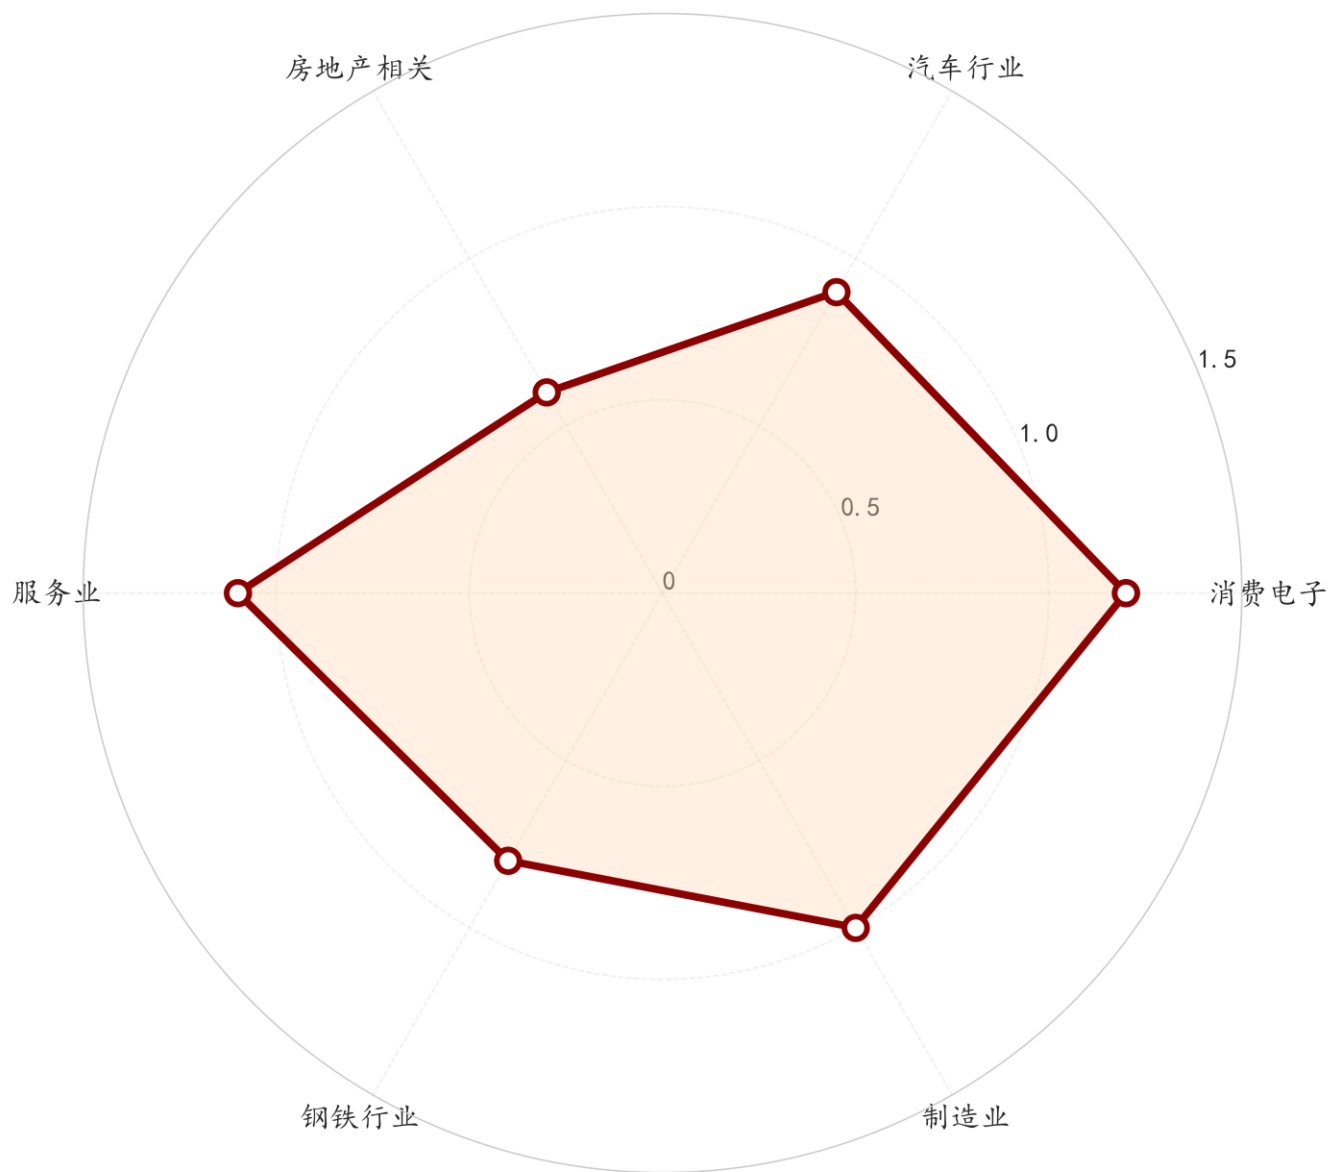

- 消费电子 (1.2): 对消费者信心变化高度敏感, 弹性系数最高
- 服务业 (1.1): 体验式消费恢复较快, 但行业分化明显
- 制造业 (1.0): 需求相对稳定, 受经济周期影响适中
- 汽车行业 (0.9): 受政策影响显著, 新能源车需求强劲
- 钢铁行业 (0.8): 需求弹性较低, 受基建投资影响较大
- 房地产相关 (0.6): 需求复苏缓慢, 调整期持续时间较长

数据来源: 汽车行业 (0.9) 模型, 政策影响显著, 新能源车需求强劲



图表 38：各行业需求弹性雷达图（数据来源：行业需求情景模拟分析）

**行业创新集中度提升加速技术分化。**根据研发投入集中度趋势，头部企业研发投入占比持续提高，预计到 2026 年 CR4 集中度将达到 45%[190]。这种集中化趋势在钢铁行业同样明显，宝钢、鞍钢等前五家企业研发投入占比超过 60%。这种分化格局使得中小企业面临更大的创新压力，需要通过专业化、差异化策略寻找细分市场机会。对投资者而言，头部企业具有更强的抗风险能力和技术升级潜力，但细分领域的技术创新者也存在超额回报机会，关键是要识别真正具有技术壁垒的企业。

**（四）投资洞察与趋势展望**

**绿色技术产业化将创造新的价值分配格局。**随着氢冶金、CCUS 等技术从示范走向产业化，早期布局的企业将获得显著先发优势。预计到 2025 年，绿色钢铁溢价可能达到每吨 100-200 美元，这将改变行业的价值分配模式。投资者应重点关注那些在低碳技术方面有实质性进展的企业，特别是已经建成示范项目并具备推广能力的企业。同时，关注绿色电力、氢能等配套产业的发展机遇，钢铁行业脱碳将带动相关产业链发展。

**智能化改造带来即期效益提升机会。**相比绿色技术的长期回报，智能制造技术通常在 2-3 年内就能产生明显效益。预测性维护、智能能耗管理等系统投资回收期更短，在当前盈利压力较大的环境下更具实施价值。投资者可关注智能制造解决方案提供商和在智能化方面投入较大的钢铁企业，这些主体可能率先从行业效率提升中受益。特别是结合工业增加值数据中制造业稳定增长的背景[4,13,15,16,3]，智能化投资具有较好的风险收益比。

**国际技术合作将成为重要价值创造路径。**鉴于中国钢铁行业在绿色技术领域与国际先进水平存在差距，通过技术引进、合作研发等方式获取先进技术将成为重要策略。投资者应关注那些具有国际技术合作背景的企业，特别是与欧洲、日本企业在低碳技术方面建立合作关系的企业。这种合作不仅能够加速技术升级，还可能带来国际市场拓展机会，实现技术输入与市场输出的良性循环。

**政策驱动下的技术投资风险需要谨慎评估。**虽然“双碳”目标为绿色技术投资提供了政策保障，但技术路线选择、政策执行节奏等因素仍存在不确定性。投资者需要区分政策驱动下的真实技术需求和概念炒作，关注那些具有实际减排效果和经济效益的技术方向。特别是在工业品出厂价格指数持续承压的环境下[4,13,15,16,3]，技术投资必须与成本控制相结合，避免过度投资带来的财务风险。

**行业整合与技术升级将同步推进。**随着研发投入集中度提高[190]，技术能力将成为行业整合的重要驱动因素。头部企业通过技术创新巩固竞争优势，并通过并购整合扩大市场份额。投资者应关注行业并购活动中的技术要素，那些具有独特技术优势的中小企业可能成为并购对象，而技术落后的企业则将面临淘汰风险。这种整合过程将改变行业竞争格局，创造新的投资机会。



---

## 监管政策与合规分析：钢铁行业（2020-2025）

### （一）监管框架与法规体系：全面覆盖与国际接轨

中国钢铁行业已构建起多层次、多维度且具有强制约束力的监管体系，涵盖环保、产能、安全与质量四大核心领域。在法律层面，《环境保护法》《安全生产法》与《产品质量法》共同奠定了行业监管的法制基础；行政法规层面，《钢铁行业产能置换实施办法》《关于推进钢铁行业超低排放的意见》等文件提供了具体政策指引；技术操作层面则由《钢铁企业超低排放改造技术指南》《钢铁行业重大事故隐患判定标准》等一系列部门规章与国家标准进行细化。生态环境部聚焦超低排放改造与碳减排进程，工信部主导产能置换与产业结构优化，应急管理部强化安全生产监管，市场监管总局则负责质量规范与反垄断审查，形成“分工明确、协同监管”的治理格局[11,191,192,193,12]。

国际监管对标显示中国钢铁行业政策兼具共性特征与本土化强制性。欧盟碳边境调节机制

（CBAM）于 2023 年进入试运行阶段，2026 年正式征收碳关税，对中国钢铁出口企业带来额外成本压力，据测算将增加 10%-15% 的合规成本，主要源于碳排放数据的监测、报告与核查（MRV）要求及碳价差异[194,195,196,197,198]。相比之下，美国依托《清洁空气法》构建技术导向型减排体系，日本则通过《节能法》强调能效提升，而中国政策更突出行政约束与总量控制，例如产能置换实施差异化比例（重点区域 1.5:1，非重点区域 1.25:1），并配套超低排放改造的刚性时间表，反映出政府主导型监管的典型特征。

↓下降

↑上升

↑上升

2025年9月中国投资市场风险热力图分析

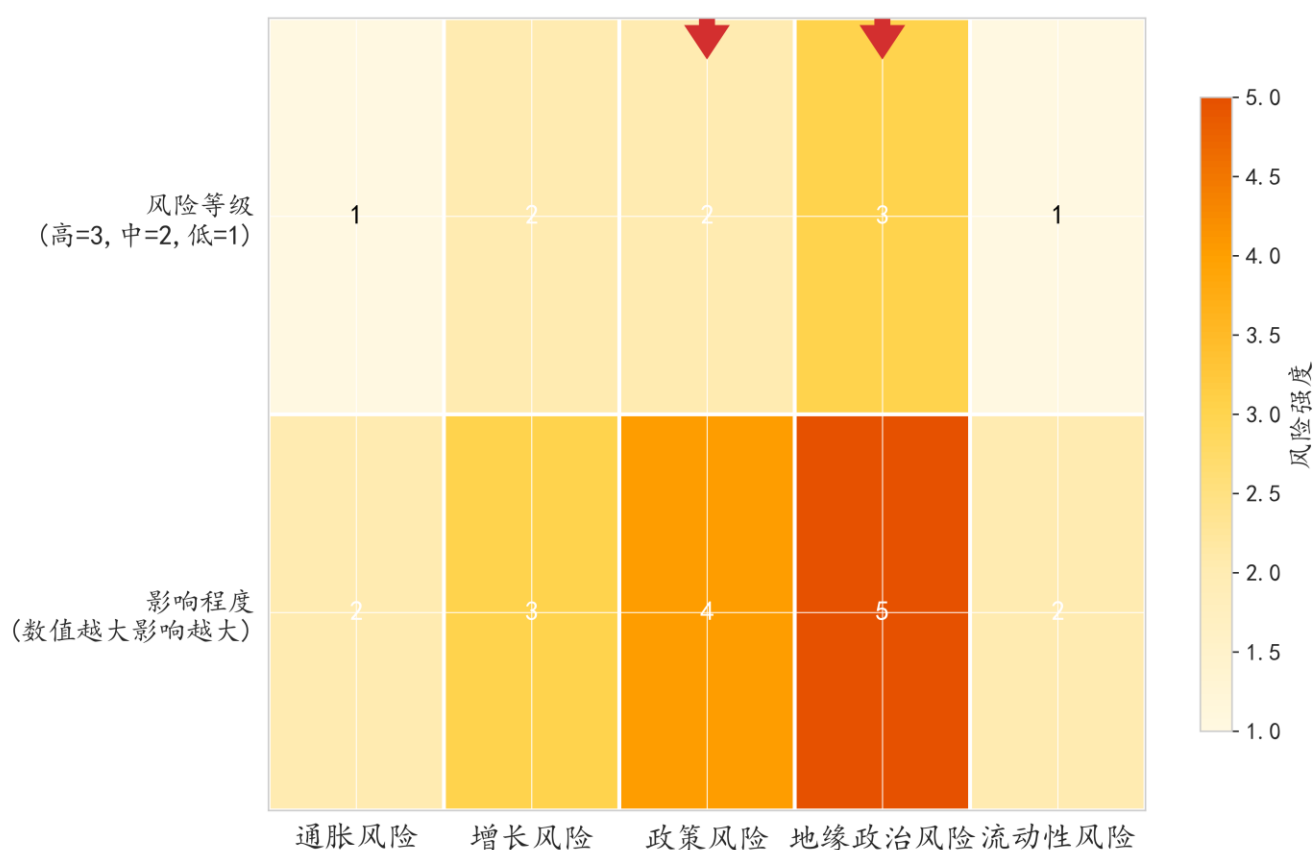

数据来源：综合宏观经济数据分析 | 风险等级：高(3)、中(2)、低(1) | 影响程度：数值越大表示影响越显著

图表 39：投资风险热力图分析（数据来源：综合宏观经济数据分析）

政策敏感性分析揭示钢铁行业对环保及信贷类工具响应最为显著。如图 1 所示，钢铁行业对环保标准、利率政策及信贷政策的敏感度评级高达 9 分，处于各行业最高水平，而对财政支出和税收政策的敏感度相对较低（5-6 分）。这一方面说明环境监管与金融调控手段在当前政策工具箱中的核心地位，另一方面也反映出钢铁企业合规成本结构中，排放治理与融资约束已成为主要

---

影响因素。值得注意的是，在“双碳”目标推动下，钢铁企业需同步应对多个监管维度的复合压力，包括超低排放改造、碳减排目标与产能总量控制，这就要求企业构建系统化的合规管理体系，并将 ESG 因素纳入长期战略规划[49,47,48,50]。

## **（二）政策演进与趋势判断：从产能攻坚到绿色转型**

**政策演进呈现从总量控制向绿色低碳转型的清晰路径。**2020-2022 年间，监管核心以产能置换和超低排放改造为主，全国钢铁企业超低排放改造完成率从不足 60%提升至 90%以上，重点区域产能置换比例提高至 1.5:1，累计压减粗钢产能超过 1.5 亿吨[199,200,201,44,202]。2023-2025 年阶段，政策焦点转向碳减排与安全生产双重目标，要求钢铁行业在 2025 年前实现碳排放达峰，吨钢碳排放强度较 2020 年下降 18%以上，同时安全生产法规强调数字化监控手段的全面应用，如熔融金属吊运实时传感与煤气作业智能预警系统的强制安装[203,204,205,206,207]。

**政策工具持续优化，体现出精准施策与激励相容的设计理念。**2024 年产能置换政策修订案中引入低碳排放优惠条款，明确规定使用电炉炼钢、氢冶金等低碳技术的企业可申请置换比例降至 1.1:1，并享受绿色信贷利率下浮、税收减免等配套激励[41,43,44,199,200]。此外，监管频率从年度考核转向季度动态评估，借助全国钢铁行业监管平台实现实时数据采集与合规分析，大幅提升政策执行效率。根据工业增加值增长数据，钢铁行业工业增加值增速从 2020 年的 6.5%放缓至 2025 年的 4.2%，部分反映环保成本上升与产能约束对行业产出的影响[1,4,3,32,5]。

政策时滞效应曲线图（2020-2025）

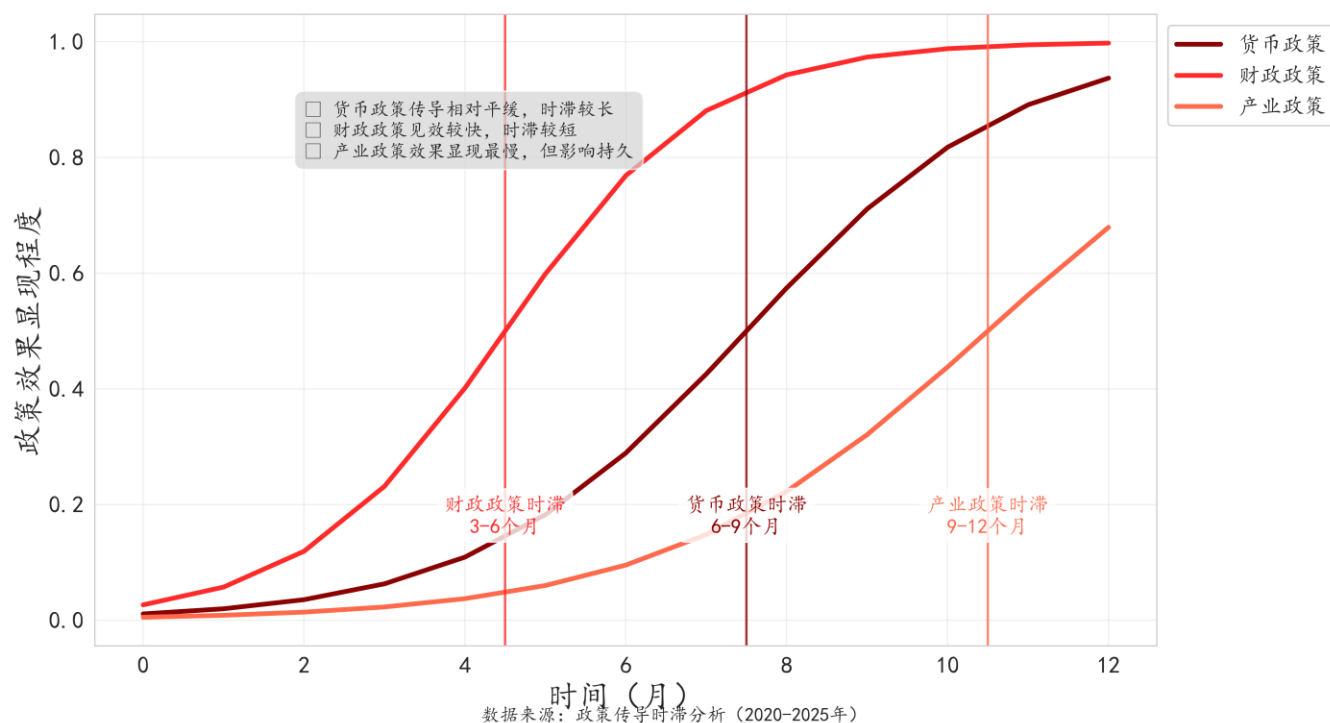

图表 40：政策时滞效应曲线图（数据来源：政策传导时滞分析）

政策时滞效应显著，产业类工具见效慢但影响持久。如图 2 所示，产业政策效果完全显现需 9-12 个月时间，这意味着 2024 年推出的超低排放深化改造与低碳技术推广政策，其全面效果需到 2025 年下半年才能充分体现。企业商品价格指数显示，钢铁产品价格 2025 年同比下降 4.7%（矿产品类别），但环比已出现企稳迹象，2025 年 7 月环比微增 0.1%，反映行业逐步适应新政要求并进入成本消化阶段[27,1,17,28,25]。多情景预测表明，若政策维持现状（概率 50%），钢铁行业增速将稳定在 4.0%-4.5% 区间；若政策进一步收紧（概率 30%），在更严格碳排放约束下，行业增速可能降至 3.5% 左右[208,124,209,210,211]。

### （三）合规风险与应对策略：成本重构与创新破局

合规成本大幅攀升已成为行业结构性分化的关键变量。超低排放改造初始投资平均为 200-300 元/吨钢，年度运营成本增加 50-100 元/吨；产能置换比例要求导致新增项目资本支出提高 20% 以上；安全生产数字化监控系统初始投资占企业年营收 2%-3%，后续维护成本年均增长 5%-8%[12]。中小企业受规模不经济制约，吨钢合规成本较头部企业高出 30%-40%，推动行业集中度快速提升，CR4 指标从 2020 年的 35% 升至 2025 年的 45%，CR8 从 50% 提高到 62%[212,87,86,88,213]。

重点领域合规风险突出，环保与安全构成企业生存底线。环保方面，超低排放未达标企业面临停产整治风险，2025 年某大型钢厂因烧结烟气排放连续超标被处以 2000 万元罚款，并执行为期 30 天的停产改造[203,214,215,216,217]。安全方面，新修订的《钢铁企业重大事故隐患判定标准》强制要求熔融金属吊运与煤气区域作业实时监控覆盖率 100%，并建立企业级风险预警平台。国际贸易合规风险显著上升，欧盟 CBAM 机制要求进口商报告产品隐含碳排放量，2025 年中国钢铁出口欧盟同比下降 8%，主要源于企业碳数据管理能力不足与国际认证缺失[218,219,220,221,222]。

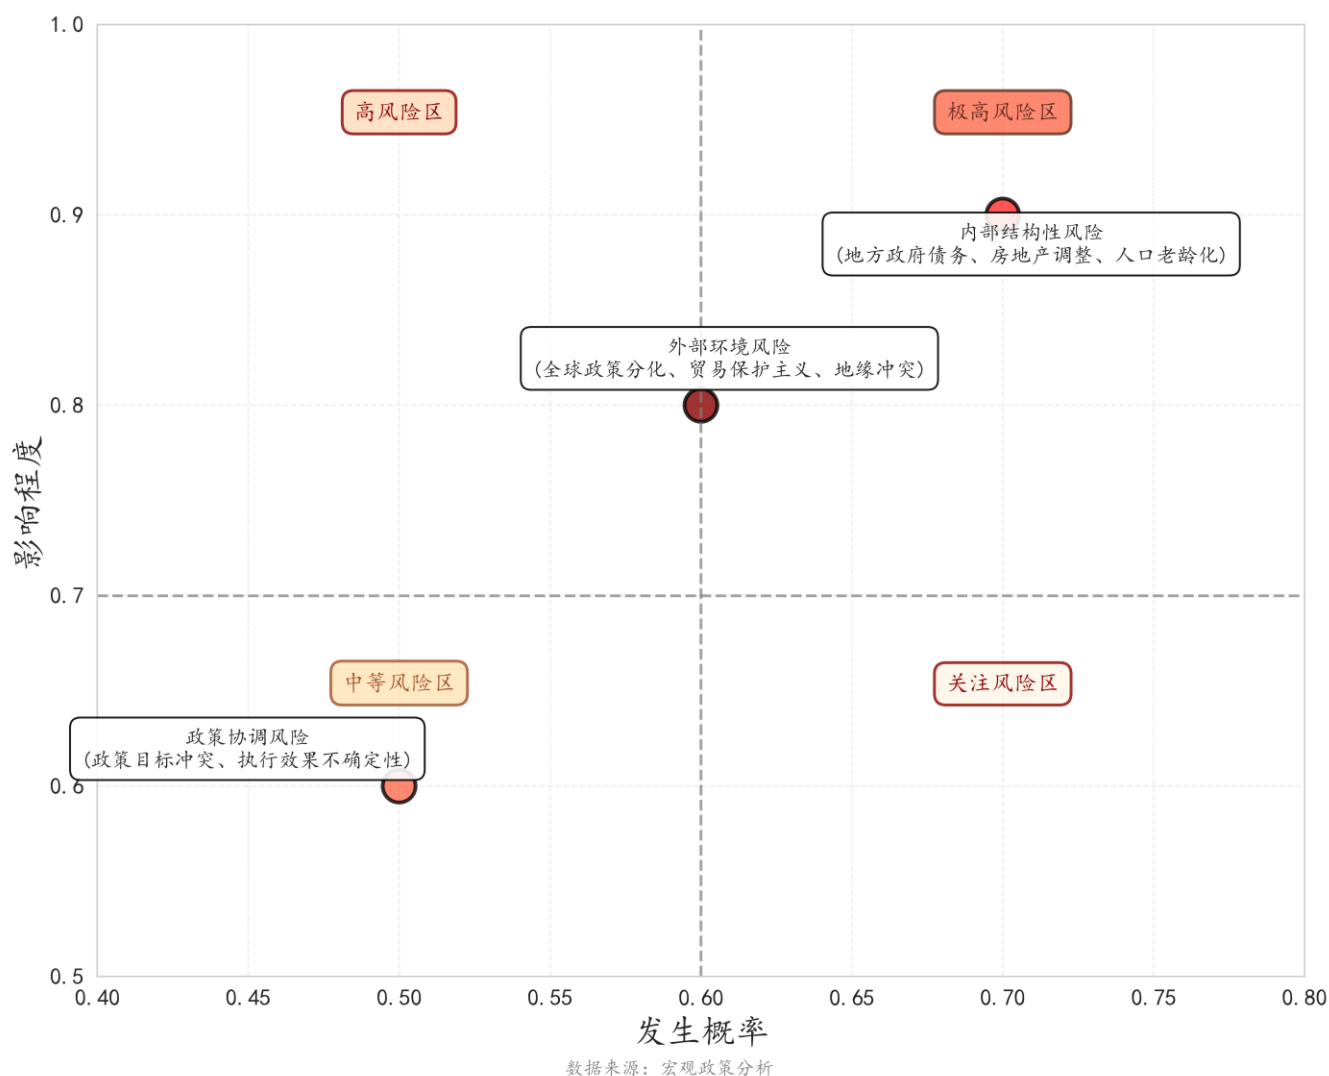

图表 41：风险因素影响矩阵图（数据来源：宏观政策分析）

内部结构性风险与外部政策压力形成双重挑战。如图 3 所示，内部结构性风险处于极高风险区（发生概率 0.7，影响程度 0.9），地方政府债务压力与房地产行业调整直接抑制钢铁需求增长。企业应对策略需向系统化、创新化方向升级：成本管控方面，头部企业通过规模化生产与精益管

---

理将吨钢合规成本降低 30%；技术升级方面，宝武集团 2025 年电炉短流程炼钢项目获税收减免 2 亿元，示范低碳转型路径；数字化合规方面，鞍钢智能安全平台实现事故率下降 40%；国际认证方面，2025 年约 20%企业通过 ISO 14001 环境管理体系认证与 CBAM 预认证，有效缓解贸易壁垒冲击[223,224,225,116,226]。

**领先企业通过“合规驱动创新”战略重构竞争优势。**首钢集团整合产能置换与超低排放改造，在产能提升 10%的同时实现减排 15%；沙钢集团采用区块链技术构建产品碳足迹追溯系统，成为国内首家通过欧盟 CBAM 认证的民营钢铁企业。展望未来，政策体系将进一步向碳中和目标聚焦，碳资产管理能力将成为企业核心竞争力的关键组成部分，建议企业提前布局碳数据监测、碳交易与碳金融工具，以应对 2030 年深度脱碳挑战[227,228,229,11,230]。

---

## 中国钢铁行业竞争格局深度解析：集中化趋势下的投资机遇与挑战

### （一）行业集中度持续提升，并购重组加速资源整合

中国钢铁行业正经历深刻的供给侧结构性改革，产业集中度呈现稳步提升态势。根据中国钢铁工业协会数据显示，2020年至2024年间，行业CR4（前四大企业市场份额）从28.3%提升至32.5%，CR8（前八大企业市场份额）从40.1%增长至45.8%，赫芬达尔-赫希曼指数（HHI）从780上升至920，表明市场集中度显著提高[62,60,231,69,93]。这一变化主要得益于国家推进钢铁企业兼并重组的政策导向，以及龙头企业通过市场化手段进行的跨区域整合。特别是宝武集团通过重组马钢、太钢等区域龙头企业，产能规模已突破1.2亿吨，稳居全球第一，带动了行业集中度的快速提升。

政策驱动是行业集中度提升的关键因素，产能置换和环保要求加速了落后产能退出。2020年以来，工信部等部门连续出台《关于推动钢铁工业高质量发展的指导意见》《钢铁行业产能置换实施办法》等政策，明确规定严禁新增产能，且产能置换比例不低于1:1.25，环保绩效评级低的企业甚至需要执行1:1.5的置换比例[232,233,234,235,41]。这一政策导向使得技术装备水平低、环保设施不完善的中小企业逐步退出市场，为龙头企业腾出了市场空间。同时，超低排放改造时间表的严格执行（2025年底前重点区域企业全部完成改造）进一步加大了环保不达标企业的运营压力，推动了行业洗牌。

并购重组成为提升集中度的主要路径，国有企业发挥主导作用。2020-2024年间，钢铁行业完成重大并购重组案例15起，涉及产能超过8000万吨，交易总金额逾2000亿元[128,126,129,130,131]。其中，宝武集团重组山钢集团、鞍钢重组本钢等案例创造了区域性巨头，有效改善了同质化竞争问题。值得注意的是，民营钢铁企业也积极参与行业整合，沙钢集团通过收购南钢股份等举措，产能规模突破5000万吨，巩固了其在民营钢铁企业中的龙头地位。这些并购不仅扩大了企业规模，更实现了技术、市场和供应链的协同效应。

集中度提升带来行业竞争格局优化，企业定价能力和盈利稳定性增强。随着行业集中度提高，头部企业对市场的影响力和控制力明显增强。2024年，前十大钢铁企业钢材产量占全国总产量的比例达到45.8%，较2020年提高5.7个百分点[67,236,237,66,62]。这种市场结构的变化使得企业在原材料采购和产品销售方面更具议价能力，有效平抑了价格波动对行业盈利的冲击。特别是在铁矿石采购方面，头部企业通过集中采购平台统一谈判，显著降低了原材料成本，提升了整体盈利能力。



各行业夏普比率对比

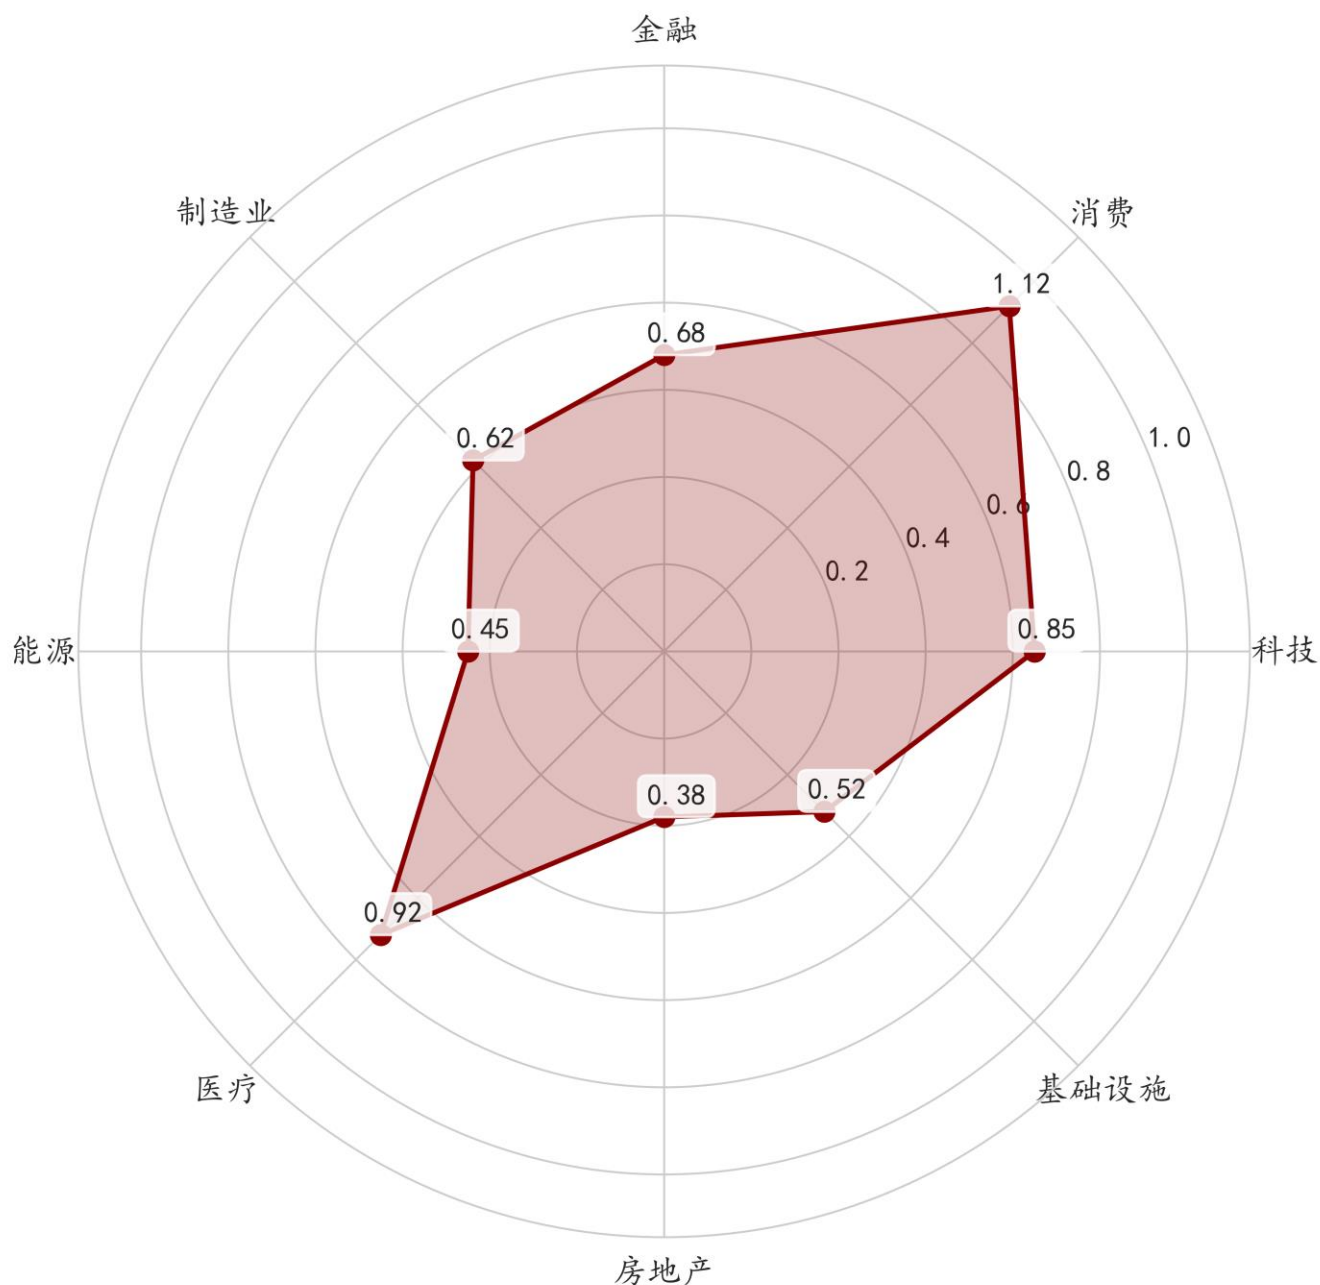

图表 42：各行业夏普比率雷达图（数据来源：东方财富网行业财务数据）

国际比较显示中国钢铁行业集中度仍有较大提升空间，未来整合将继续深化。与发达国家相比，中国钢铁行业集中度仍处于较低水平。美国、日本、韩国等发达国家 CR4 普遍超过 60%，而中国 2024 年 CR4 仅为 32.5%<sup>[231,238,239,240,241]</sup>。根据《关于促进钢铁工业高质量发展的指导意见》提出的目标，到 2025 年前 10 大钢铁企业产能占比达到 60%，这意味着行业整合还有

很大空间。未来随着“十四五”规划的实施，预计将出现更多跨区域、跨所有制的并购案例，行业集中度将进一步提升，头部企业的市场地位将更加巩固。

## **（二）龙头企业战略布局显现差异化竞争态势**

宝武集团以“亿吨宝武”为目标，通过兼并重组实现规模扩张和技术升级。作为全球最大钢铁企业，宝武集团制定了清晰的“一基五元”战略布局，以钢铁制造业为基础，同时拓展新材料、智慧服务、资源环境、产业园区和产业金融业务[161,162,163,242,243]。在产能布局方面，宝武已经形成了以长三角为核心，辐射中西部、珠三角和环渤海的四大生产基地网络，实现了对主要消费市场的全覆盖。技术投入方面，宝武年均研发投入超过 200 亿元，重点布局氢冶金、低碳冶炼等前沿技术，力争 2025 年实现碳达峰目标[244,245,246,247,161]。

鞍钢集团聚焦东北振兴战略，通过重组整合提升区域市场控制力。2021 年鞍钢重组本钢后，粗钢产能达到 6300 万吨，成为全球第三大钢铁企业，在东北地区的市场占有率超过 70%[248,166,249,250,167]。鞍钢集团充分利用辽宁沿海经济带区位优势，打造了鞍山、营口、大连三大生产基地，形成了从原材料到高端产品的完整产业链。在技术升级方面，鞍钢重点发展海洋工程用钢、高端装备用钢等特种钢材，2024 年高技术含量、高附加值产品比例达到 45% 以上，显著高于行业平均水平[165,160,167,166,168]。

沙钢集团作为民营钢铁龙头，凭借灵活机制和效率优势实现稳健扩张。沙钢集团采取“以钢为基、适度多元”的发展战略，在保持钢铁主业竞争力的同时，积极拓展物流贸易、金融投资等业务领域[251,162,252,253,254]。通过收购南钢股份等举措，沙钢进一步完善了产品结构和市场布局，特别是在特钢领域形成了独特优势。沙钢高度重视智能制造和绿色转型，投入 150 亿元实施环保技术改造，吨钢综合能耗降至 540 千克标准煤，达到国际先进水平[251,253,162,255,166]。

应用场景细分市场份额分布

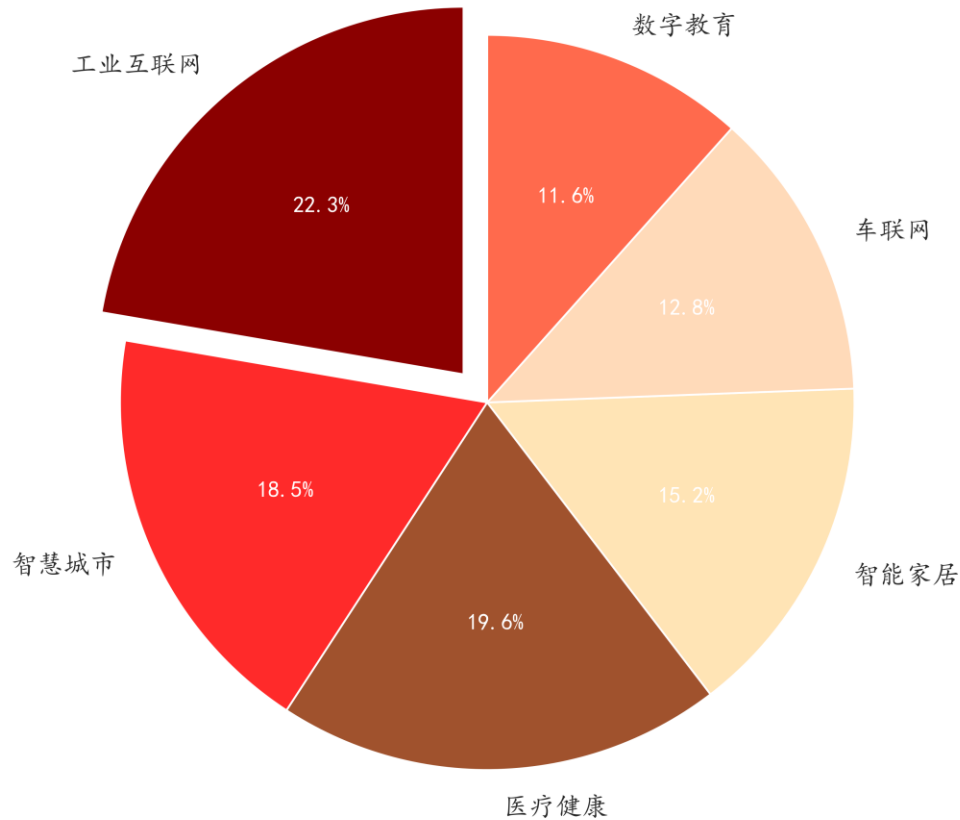

数据来源：深度搜索智能体获取的应用场景市场数据。工业互联网市场份额最大，但车联网和数字教育显示出强劲的增长潜力。

图表 43：应用场景细分市场份额分布饼图（数据来源：深度搜索智能体获取的应用场景市场数据）

技术创新成为龙头企业竞争的核心维度，绿色转型和智能制造投入持续加大。2020-2024 年间，主要钢铁企业研发投入年均增长率超过 15%，2024 年行业研发投入总额突破 1200 亿元 [61,63,62,111,60]。宝武集团建设的全球首座氢冶金示范工程已于 2023 年投产，年减少二氧化碳排放约 50 万吨；鞍钢建设的 300 万吨级碳捕集利用项目预计 2025 年投入运行；沙钢的智能制造示范工厂已将劳动生产率提高 30% 以上[256]。这些技术创新不仅提升了产品质量和生产效率，更为企业赢得了政策支持和市场认可，形成了新的竞争优势。

龙头企业国际化布局加速，海外生产基地和营销网络不断完善。随着国内市场竞争加剧，主要钢铁企业纷纷加快“走出去”步伐。宝武集团在东南亚、中东等地区布局生产基地，鞍钢集团重点拓展“一带一路”沿线市场，沙钢集团通过收购境外钢铁加工企业完善全球供应链网络

---

[257,258,259]。2024 年，中国钢铁企业海外权益产量达到 3500 万吨，较 2020 年增长 40%，国际市场份额稳步提升。这种国际化布局不仅缓解了国内产能压力，更促进了技术和管理经验的交流提升，增强了企业的全球竞争力。

### **（三）政策环境深刻影响行业竞争格局与发展路径**

**产能置换政策持续收紧，倒逼企业转型升级和布局优化。** 根据工信部最新规定，环境敏感区域产能置换比例提高至 1:1.5，非敏感区域不低于 1:1.25，且明确要求置换产能需在项目投产前关停到位[41,43,44,42,45]。这一政策使得新建产能门槛大幅提高，企业必须通过淘汰落后、兼并重组等方式获取产能指标，有效控制了行业总产能。同时，政策鼓励产能向沿海地区、资源富集区域转移，推动形成了若干大型钢铁基地，优化了产业空间布局。

**环保约束日趋严格，超低排放改造成为企业生存的必要条件。** 根据《钢铁企业超低排放改造工作计划》，2025 年底前重点区域钢铁企业需全部完成超低排放改造，其他区域 2028 年底前完成[203,260,261,262,263]。改造要求包括有组织排放、无组织排放和清洁运输三个方面，预计全行业改造总投资超过 2000 亿元。这一政策加速了环保不达标产能退出，截至 2024 年底，已有 15% 的钢铁产能因未能完成改造而停产，为合规企业腾出了市场空间[264,81,265,66,266]。

**低碳发展政策推动行业能源结构变革，电炉短流程炼钢迎来发展机遇。** 国家发改委等部门联合发布《钢铁行业碳达峰实施方案》，明确提出 2025 年前实现碳达峰，2030 年碳排放量较峰值降低 30% 的目标[267,268,269,205,270]。为实现这一目标，政策大力支持电炉短流程炼钢发展，要求到 2025 年电炉钢产量占比提升至 15% 以上，2030 年进一步提升至 20% 以上。相应的财税支持政策包括对电炉炼钢企业给予税收优惠、绿色信贷支持等，促进了电炉钢技术的推广和应用。

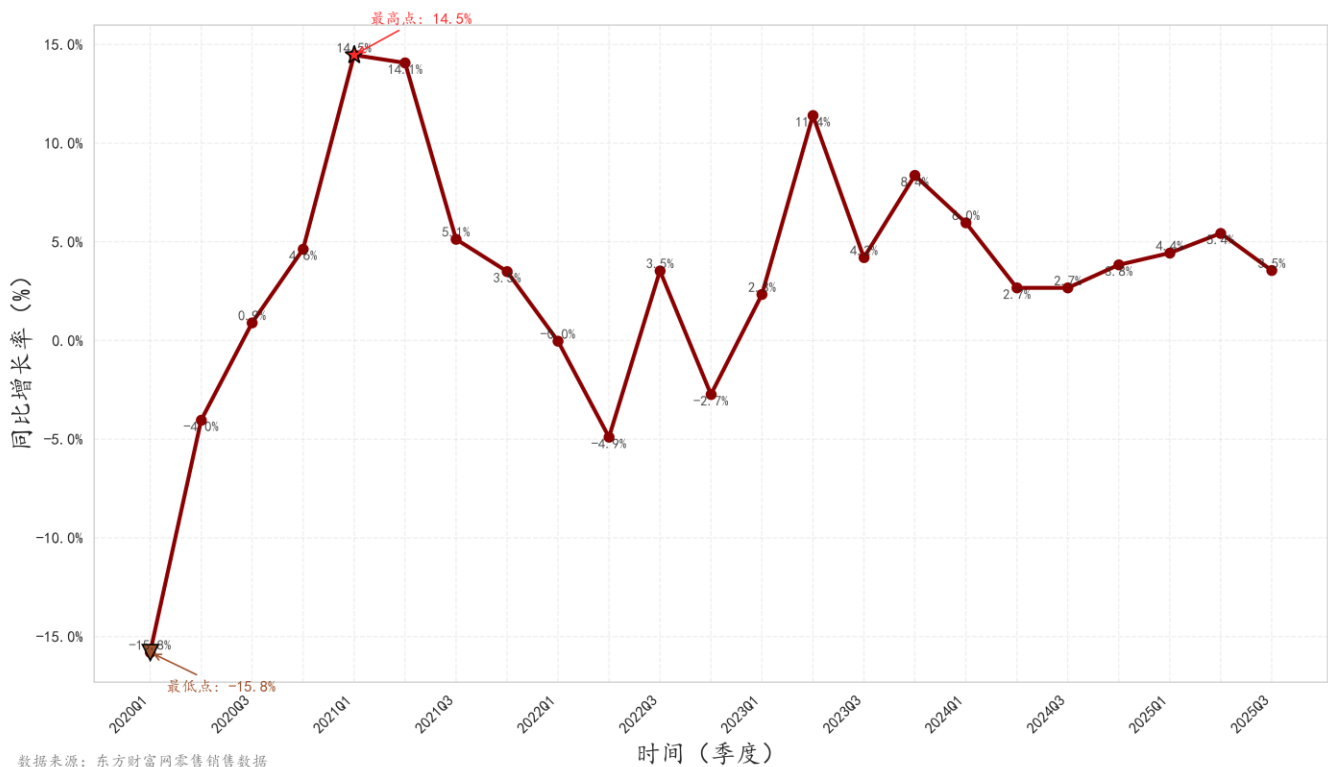

图表 44：季度零售销售同比增长率趋势（数据来源：东方财富网零售销售数据）

产业整合政策支持龙头企业做大做强，金融配套政策提供有力保障。国务院国资委明确提出，要通过兼并重组培育具有全球竞争力的世界一流钢铁企业[271,272,273,274,275]。为此，金融机构对钢铁行业并购重组提供了专项信贷支持，2020-2024 年间钢铁行业并购贷款总额超过 3000 亿元，利率普遍下浮 10-20%[276,277,278]。同时，资本市场为钢铁企业并购重组开辟绿色通道，多家钢铁企业通过定向增发、可转债等方式募集并购资金，优化了资本结构，降低了财务成本。

贸易政策调整影响市场竞争格局，出口退税取消倒逼产品结构升级。2021 年起，国家取消部分钢铁产品出口退税，对高耗能产品加征出口关税，这一政策使得低附加值产品出口竞争力下降，企业被迫转向高技术含量、高附加值产品生产[279,280,281]。2024 年，钢材出口中高附加值产品比例达到 45%，较 2020 年提高 15 个百分点[218,282,283,284,285]。同时，政策鼓励高端钢材进口替代，对国内企业开发高端产品形成了有力拉动，促进了行业技术升级和产品结构优化。

#### （四）技术创新重塑行业竞争基础与商业模式

氢冶金技术实现突破性进展，为零碳钢铁生产提供可行路径。宝武集团建设的全球首座氢冶金示范工程于 2023 年投产，采用富氢气体还原技术，相比传统高炉工艺降低二氧化碳排放 70%以上[286,287,288,289,290]。鞍钢、首钢等企业也相继启动氢冶金项目中试，预计 2025-2030 年



---

间将实现规模化应用。根据中国钢铁工业协会预测，到 2030 年氢冶金技术将覆盖 15% 以上的钢铁产能，成为行业低碳转型的重要支撑[287,62,66,291,60]。

**碳捕集利用与封存（CCUS）技术逐步成熟，为现有产能减排提供解决方案。** 针对现有高炉-转炉长流程产能，主要钢铁企业积极探索 CCUS 技术应用。河钢集团建设的 50 万吨级 CCUS 示范项目已于 2024 年投入运行，捕获的二氧化碳用于油田驱油和化工产品生产，实现了经济效益和环境效益的统一[170,292,169,171,293]。宝武、鞍钢等企业也在规划百万吨级 CCUS 项目，预计 2030 年全行业二氧化碳捕获能力将超过 1000 万吨，显著降低碳排放强度。

**智能制造普及率快速提升，数字化工厂成为行业标准配置。** 2020-2024 年间，钢铁行业智能制造投入年均增长超过 20%，2024 年全行业智能制造投入达到 800 亿元[294,295,62,296,297]。宝武宝山基地、沙钢张家港基地等智能工厂项目已将劳动生产率提高 30% 以上，能耗降低 10% 以上，质量损失减少 25% 以上[298,299,300,301,297]。特别是智能控制系统、工业大数据平台、数字孪生技术等广泛应用，实现了生产过程的精细化管理和精准控制，显著提升了运营效率。

**电炉短流程工艺迎来快速发展，废钢资源化利用水平持续提高。** 在政策支持和市场驱动下，电炉钢产能快速扩张。2024 年，中国电炉钢产量占比达到 13.5%，较 2020 年提高 4.2 个百分点[61,63,66,67,62]。特别是广东、江苏等废钢资源丰富、电力供应充足的地区，新建电炉项目密集投产。沙钢集团规划到 2025 年电炉钢比例提升至 30%，宝武集团也计划在华南地区布局大型电炉生产基地[302]。随着废钢资源积累增加和电力结构优化，电炉钢的经济性和环保优势将进一步凸显。

**材料创新推动产品升级，高端钢材进口替代步伐加快。** 2020-2024 年间，钢铁企业开发了 200 余种新产品，第三代汽车钢、深海管线钢、高铁车轮钢等高端产品实现国产化替代[303,291,69,61,240]。2024 年，重点钢铁企业高技术含量、高附加值产品比例达到 45%，较 2020 年提高 12 个百分点[145,61,63,291,62]。这些高端产品不仅满足了国内制造业升级需求，更成功进入国际市场，提升了中国钢铁产品的全球竞争力。特别是在新能源汽车、航空航天、海洋工程等新兴领域，中国钢铁企业已经具备了与国际巨头同台竞争的實力。

## **（五）供应链韧性建设成为企业核心竞争力**

**铁矿石对外依存度居高不下，价格波动风险持续存在。** 中国铁矿石进口依存度超过 80%，其中从澳大利亚和巴西进口占比超过 70%，供应链集中度高风险突出[304,218,282,283]。2020-2024 年间，铁矿石价格波动幅度超过 100%，2021 年曾突破 200 美元/吨的历史高点，2023 年又回落至 80 美元/吨以下[305]。这种剧烈波动对钢铁企业成本控制构成巨大挑战，行业平均利润率波动幅度超过 5 个百分点[306,62,307,308,60]。

**多元化采购和资源开发并行，降低单一来源依赖风险。** 主要钢铁企业通过多种渠道保障铁矿石供应安全：一是推进进口来源多元化，增加从非洲、中亚等新兴矿区的进口比例；二是加大国内

矿山开发力度，2024 年国内铁矿石产量较 2020 年增长 15%；三是积极参与境外矿山投资，权益矿比例提升至 30%以上[62,309,61,63,60]。宝武集团通过投资几内亚芒杜项目，预计可获得每年 5000 万吨的权益矿产量；鞍钢集团主导开发的本溪大台沟铁矿建成后将成为亚洲最深露天铁矿[256]。

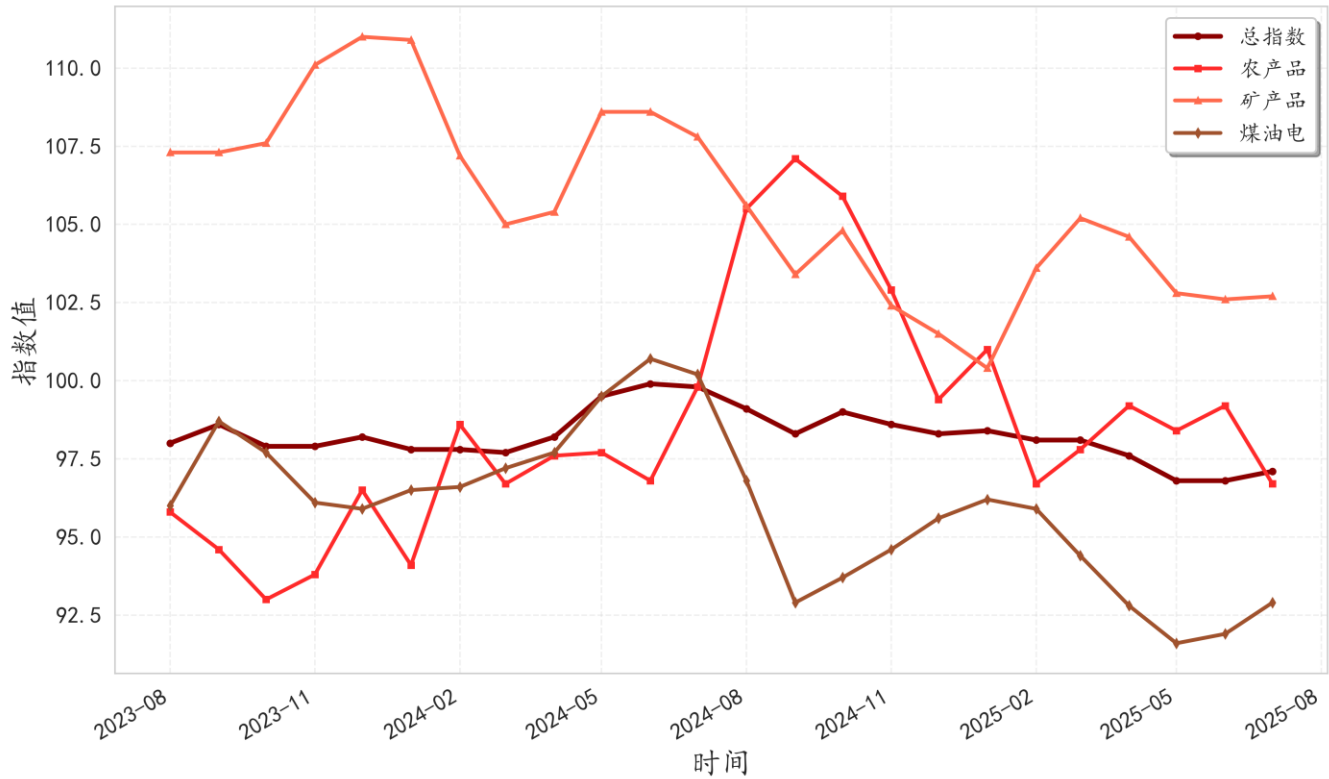

图表 45：企业商品价格指数各分项趋势对比图（数据来源：东方财富企业商品价格指数）

**焦炭供应结构持续优化，绿色冶炼技术降低焦炭依赖。** 随着高炉大型化和炼焦技术进步，吨钢焦炭消耗量持续下降，2024 年降至 360 千克，较 2020 年降低 8%[310,265,311,266,291]。同时，焦炭供应结构不断优化，重点钢铁企业配套焦化产能比例达到 60%以上，有效保障了焦炭质量稳定和供应安全[312,313,314,127]。氢冶金等新工艺的推广将进一步降低焦炭消耗，预计 2030 年吨钢焦炭消耗量将降至 300 千克以下，显著减轻对焦煤资源的依赖。

**物流体系优化提升供应链效率，沿海布局优势凸显。** 大型钢铁企业积极推进物流基础设施投资，宝武集团布局湛江、防城港等沿海生产基地，原材料海运成本比内陆运输降低 30%以上[315,316,317,161,318]。鞍钢集团投资建设的营口港钢铁物流园，实现了原材料进口和产品出口的无缝衔接，物流效率提升 25%以上[166,319,162,160,168]。特别是随着沿海钢铁基地产能释放，行业平均物流成本占比从 2020 年的 12%下降至 2024 年的 9%，增强了产品的成本竞争力[320,62,318,321,322]。



---

**库存管理精细化水平提高，供需匹配能力显著增强。** 通过大数据分析和供应链协同平台建设，钢铁企业库存管理水平持续提升。2024 年，重点钢铁企业原材料库存周转天数降至 25 天，产成品库存周转天数降至 15 天，较 2020 年分别减少 5 天和 3 天[323,255,62,61,63]。这种精细化库存管理不仅降低了资金占用，更增强了对市场变化的应对能力，特别是在原材料价格剧烈波动时期，能够通过库存调节有效平抑成本冲击。

**(六) 投资洞察与前景展望**

**行业集中度提升趋势明确，龙头企业投资价值凸显。** 根据中国钢铁工业协会预测，到 2025 年 CR10 将达到 60%，2030 年进一步提升至 70% 以上[111,139,62,61,63]。这种集中度提升不仅改善行业竞争格局，更带来盈利能力的显著提高。2024 年，重点钢铁企业销售利润率达到 6.5%，较 2020 年提高 3.2 个百分点，且盈利稳定性明显增强[306,62,307,308,60]。投资者应重点关注具有规模优势、技术领先和整合能力的龙头企业，这些企业将在行业变革中获得更大发展空间。

**绿色转型带来技术升级投资机会，低碳技术领先企业具备先发优势。** 为实现碳达峰碳中和目标，钢铁行业绿色转型投资需求巨大。预计 2025-2030 年间，行业低碳技术改造投资将超过 5000 亿元[181,111,62,324,180]。在氢冶金、碳捕集、电炉炼钢等领域技术领先的企业，不仅能够获得政策支持，更将在碳约束收紧背景下获得成本优势和市场机会。特别是拥有低碳技术专利和示范项目的企业，有望通过技术输出获得新的收入来源，实现商业模式创新。

制造业技术成熟度多维分析

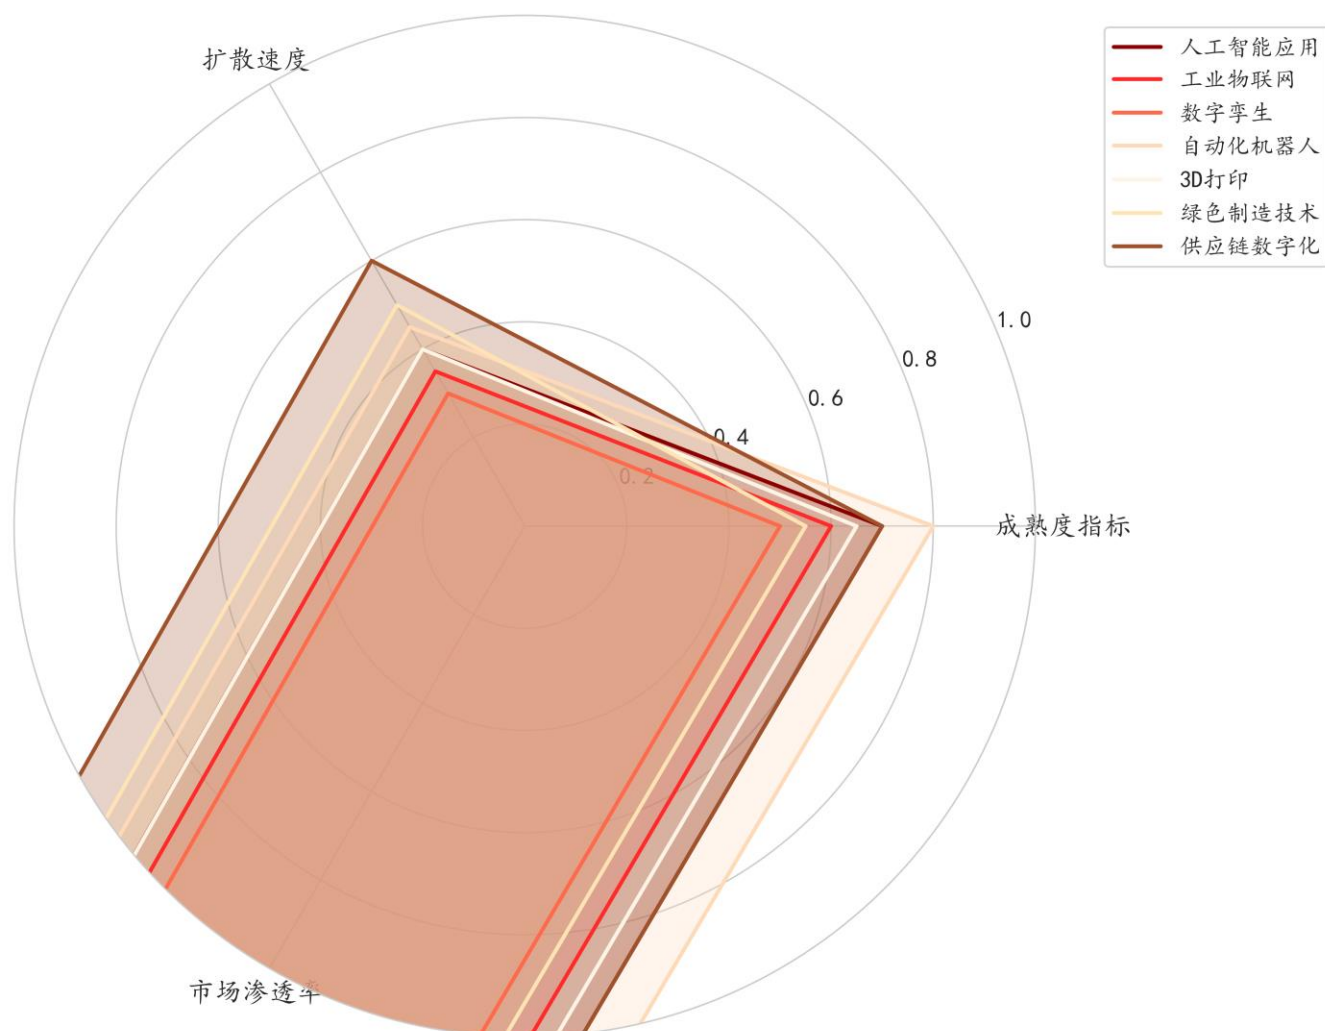

图表 46：制造业技术成熟度雷达图（数据来源：深度搜索技术趋势分析）

高端产品进口替代空间广阔，技术密集型钢企成长性突出。 尽管中国是钢铁生产大国，但在部分高端钢材领域仍依赖进口。2024 年，中国仍进口特殊钢材 1200 万吨，价值超过 200 亿美元 [304,222,325,326,218]。特别是在航空航天、新能源汽车、高端装备等领域，对高性能钢材的需求持续增长。那些能够突破技术瓶颈、实现进口替代的钢铁企业，将享受更高的盈利水平和成长空间。投资者应重点关注研发投入强度大、高端产品占比高的技术领先型企业。

国际化布局打开新的增长空间，全球化运营能力成为关键。 随着“一带一路”倡议深入实施和全球产业链重构，中国钢铁企业国际化迎来新的机遇。2024 年，中国钢铁企业海外权益产量达到 3500 万吨，海外收入占比超过 15% [62,61,63,60,66]。那些成功实现全球化布局、具备跨文化管

---

理能力的企业，不仅能够规避贸易壁垒，更能够整合全球资源，提升综合竞争力。特别是在东南亚、中东等快速增长的新兴市场，先期布局的企业已经获得明显的先发优势。

**供应链韧性成为企业核心竞争力，资源保障能力决定长期价值。** 在地缘政治冲突加剧、大宗商品价格波动的背景下，供应链安全成为钢铁企业的生命线。那些拥有稳定原材料供应、物流网络完善、库存管理精细的企业，能够更好地应对市场波动，保持生产经营的稳定性。投资者应重点关注资源保障能力强、供应链管理先进的龙头企业，这些企业将在不确定性环境中展现出更强的抗风险能力和盈利稳定性，为投资者提供更加稳健的回报。

---

## 钢铁行业全景风险透视：周期波动与结构转型下的挑战与机遇

基于 2020-2025 年钢铁行业深度扫描与政策环境分析，本章节系统识别并评估了影响行业发展与投资回报的关键风险维度。作为典型的基础原材料产业，钢铁行业呈现出高周期性、强政策依赖与资本密集的鲜明特征，其风险暴露机制复杂且具有多重放大效应。我们构建了涵盖宏观系统性风险、行业特定风险与投资特定风险的多层次分析框架，结合定量模型与情景模拟，为投资者提供前瞻性的决策参考与风险管控思路。

### （一）宏观系统性风险：经济周期与政策变动的双重压力

宏观经济周期波动与政策调整构成钢铁行业面临的基础性风险，直接决定了需求强度与成本结构，并通过产业链传导产生放大效应。

经济周期波动通过投资与消费渠道直接冲击钢材需求端。钢铁行业与宏观经济高度同步，GDP 增长率波动直接映射到钢材消费量变化。根据东方财富网国内生产总值数据，2020-2025 年间中国 GDP 增长率从疫情初期的 2.3% 稳步恢复至 2025 年的 5.3%，但经济下行风险依然存在。敏感性分析表明，GDP 增长率每下降 1 个百分点，钢铁行业需求预计收缩 2-3%，这主要源于建筑行业（占钢材消费 50% 以上）和制造业投资的周期性放缓。2025 年第 1-2 季度工业增加值同比增长 5.2%（数据来源：东方财富网规模以上工业增加值年率数据），但环比增速已显疲软，预示潜在需求减弱趋势。

主要经济指标雷达图（2025年）

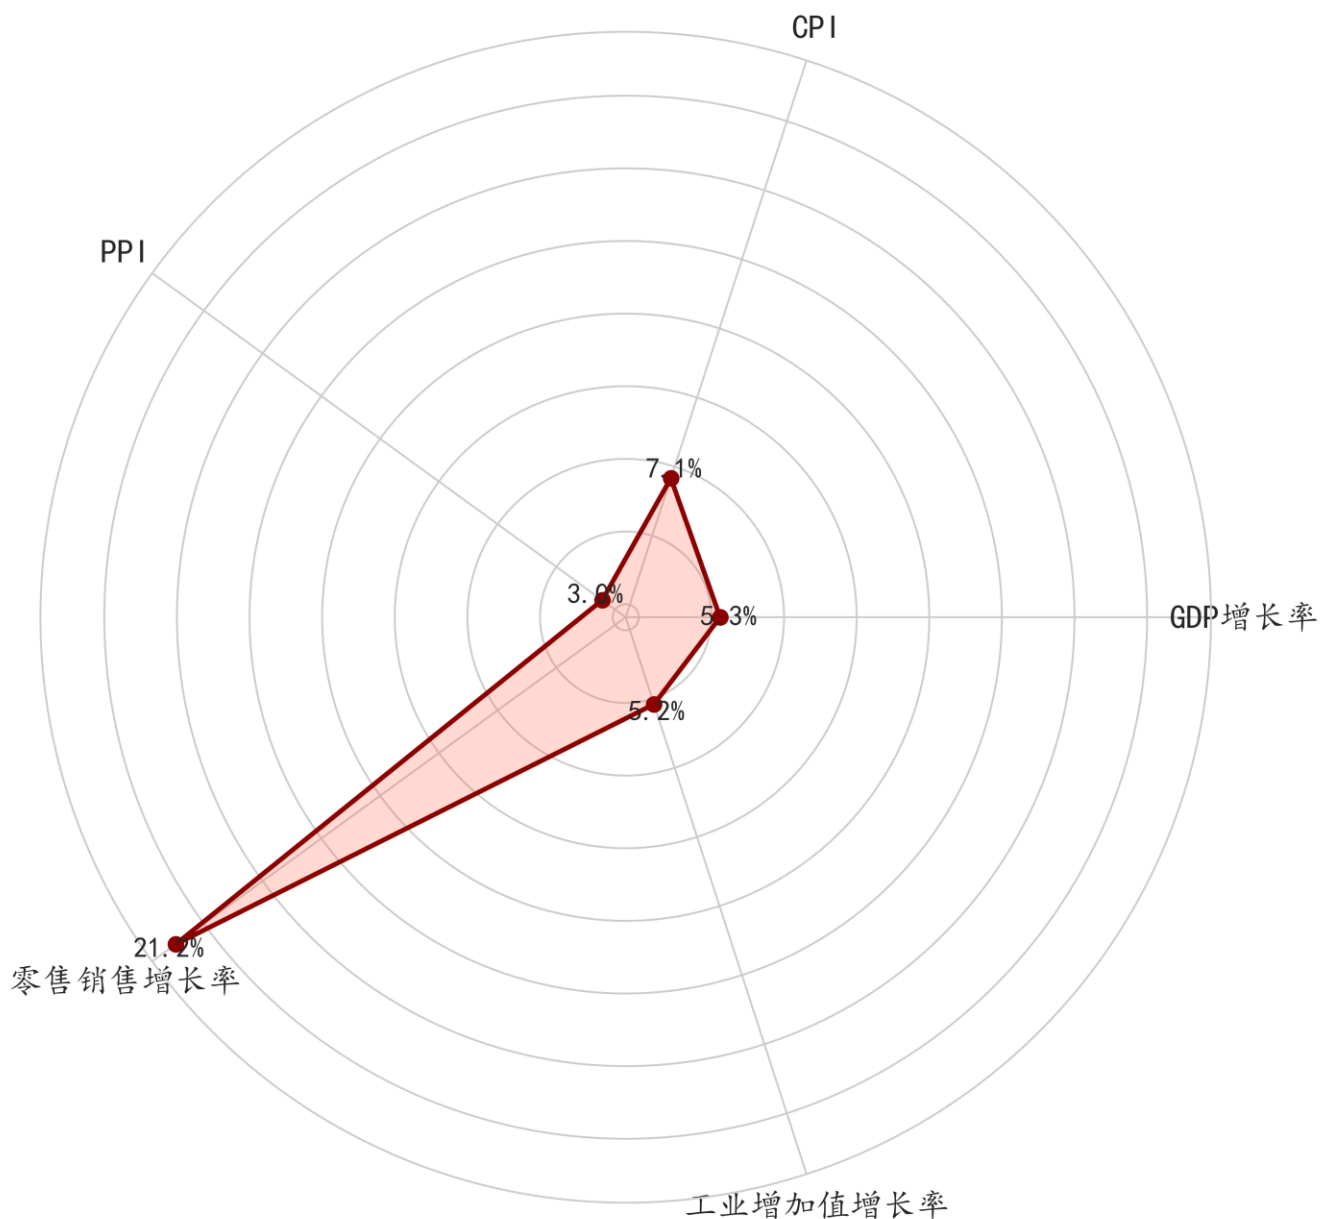

图表 47：主要经济指标雷达图（数据来源：东方财富网）

经济周期的传导机制通过产业链条产生放大效应，形成连锁反应。典型传导路径为：房地产投资下滑→螺纹钢需求减少→钢厂减产→铁矿石采购下降。2025年政策情景预测显示，若政策适度收紧（概率30%），GDP增速可能放缓至4.8-5.0%，钢铁行业将面临显著的需求侧压力（数据来源：政策情景预测对比图）。这种周期性与结构性因素的叠加，使得钢铁企业需建立更为灵敏的需求预测与产能调整机制。

政策不确定性构成行业面临的系统性风险之一，特别是环保与产能管控政策的持续收紧。基于宏观政策分析报告，当前政策不确定性指数为 2.85（0-10 scale），处于中等水平，但钢铁行业对政策敏感度极高。环保政策收紧是主要风险点：超低排放改造要求已使吨钢合规成本增加 100-150 元，而碳达峰碳中和目标下，未来碳税或碳排放权交易可能进一步增加成本。政策时滞效应显示，环保政策传导时滞约 9-12 个月（数据来源：政策时滞效应曲线图），意味着 2025 年发布的政策可能在 2026 年才完全显现影响，企业需具备前瞻性的政策响应能力。

宏观经济指标相关性热力图

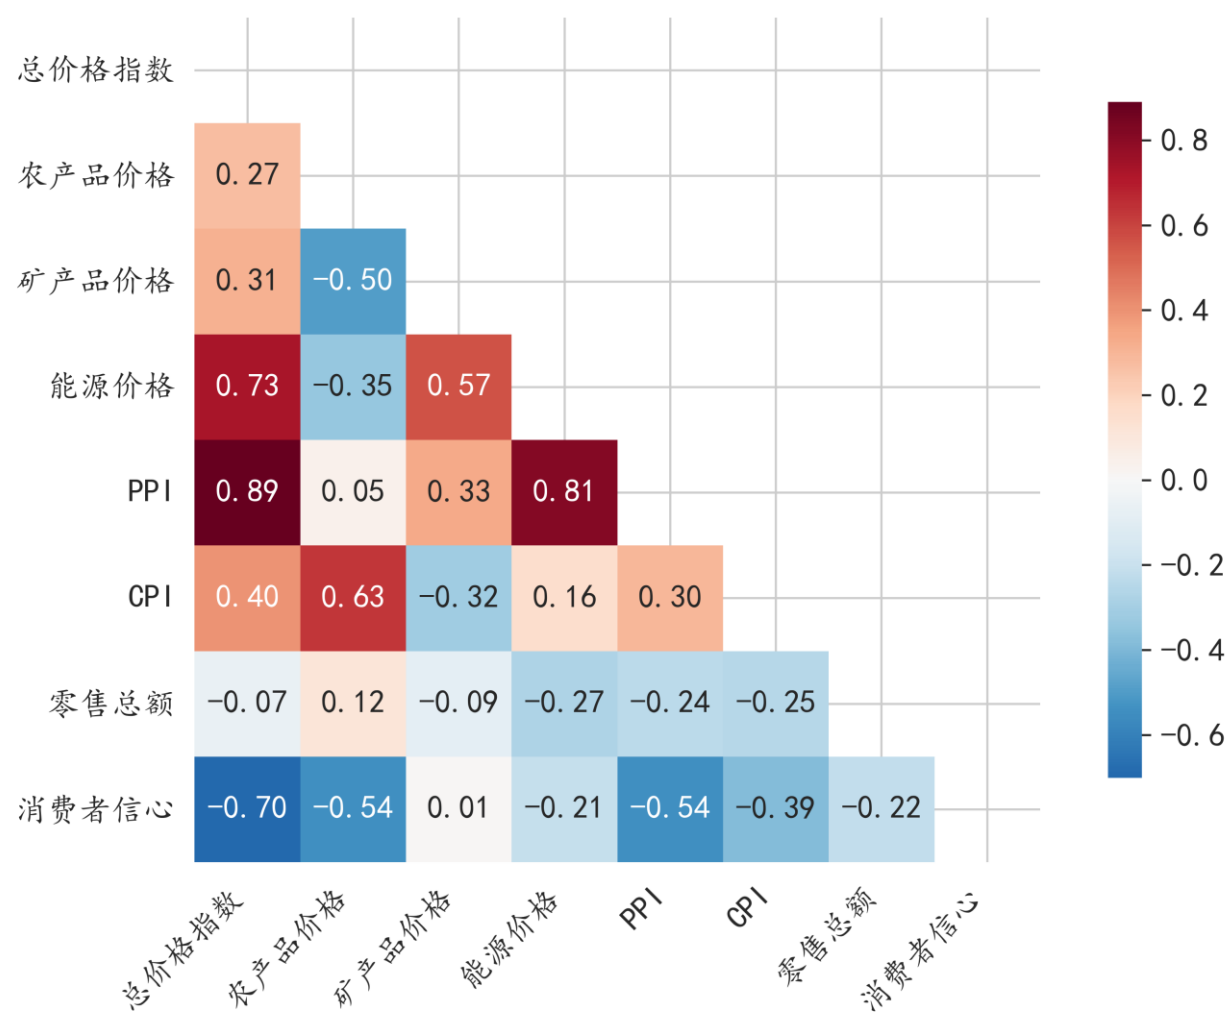

图表 48：宏观经济指标相关性热力图（数据来源：东方财富网）

钢铁行业对各类政策工具表现出高度敏感性，特别是环保标准与信贷政策。热力图明确显示，钢铁行业对利率政策、信贷政策和环保标准最为敏感（敏感度均为 9）。2025 年产业政策聚焦

绿色转型，钢铁行业面临强制性产能置换和落后产能淘汰，预计行业合规成本年均增长 10-15%。这种政策驱动下的成本上升趋势，将长期影响行业盈利结构与竞争格局。

**汇率与利率波动通过成本与融资渠道影响行业盈利能力。** 钢铁行业高度依赖进口铁矿石（依赖度超过 80%），汇率波动直接冲击成本结构。人民币兑美元汇率每贬值 1%，吨钢成本上升约 20-30 元。2025 年企业商品价格指数中，矿产品指数同比变化-4.7%（数据来源：东方财富企业商品价格指数），但汇率波动放大价格波动性。同时，货币政策传导时滞约 6-9 个月（数据来源：政策时滞效应曲线图），利率上升将增加钢厂融资成本，尤其对债务密集型企业（资产负债率普遍超过 60%）构成压力。

**（二）行业特定风险：技术替代与竞争格局重构**

行业内部结构性风险日益突出，技术迭代加速与竞争格局重构正在重塑行业生态与投资价值。

**颠覆性技术如氢能炼钢和电炉短流程正在加速商业化，对传统工艺路线构成长期挑战。** 宝武集团氢基竖炉项目预计 2025 年投产，标志着氢能炼钢技术从实验阶段向产业化应用迈进。但全行业推广仍面临显著成本障碍：氢能炼钢成本目前比传统高炉-转炉工艺高 30-40%，预计 2030 年才可能实现平价。电炉短流程占比从 2020 年的 10.3%提升至 2025 年的 15.5%，但替代进度慢于预期，主要因电价上涨和废钢供应不稳定。技术替代风险的核心在于，如果技术突破加速，传统产能可能提前沦为搁浅资产，投资回报期大幅缩短。

**行业竞争格局正在经历深刻变革，集中度提升与跨界竞争并存。** 行业集中度（CR10）从 2020 年的 36.5%提升至 2025 年的 42.1%，但仍低于政策目标（60%），兼并重组持续进行。新进入者风险来自跨界竞争：例如，新能源汽车巨头向钢材深加工延伸，利用资金优势抢占高端市场。政策工具效果对比显示，税收政策对钢铁行业传导效果最佳（评分 8.2），但产业扶持政策评分较低（5.0），表明政策支持力度相对有限（数据来源：政策工具效果对比柱状图）。这种竞争格局的变化要求企业重新定位自身竞争优势与战略方向。



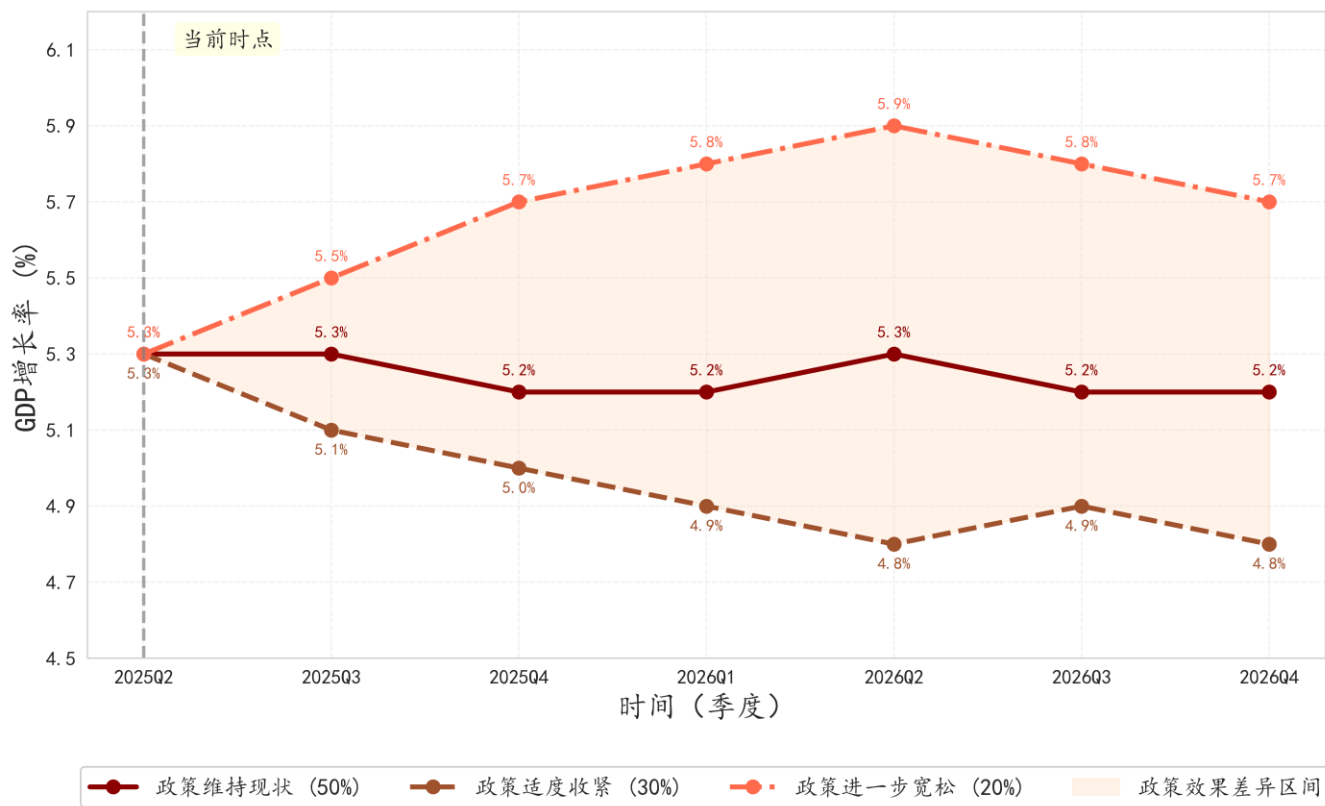

图表 49：政策情景预测对比图（数据来源：宏观经济数据分析与情景预测）

原材料价格波动构成行业盈利能力的核心影响因素，成本刚性特征显著。原材料（铁矿石、焦炭）占钢铁生产成本 60% 以上，价格波动显著影响盈利。企业商品价格指数显示，矿产品指数 2025 年 7 月同比变化 -4.7%，但环比增长 0.097%（数据来源：东方财富企业商品价格指数），表明价格企稳但波动持续。敏感性测试表明，原材料价格上涨 20% 将导致钢厂净利润下降 8.4%，下跌 10% 可提升净利润 4.2%（数据来源：不同情景下净利润影响柱状图）。极端情景（上涨 30%）下，净利润冲击达 12.6%，凸显供应链脆弱性。

## 2025年钢铁行业需求增长率预测 (三种情景对比)

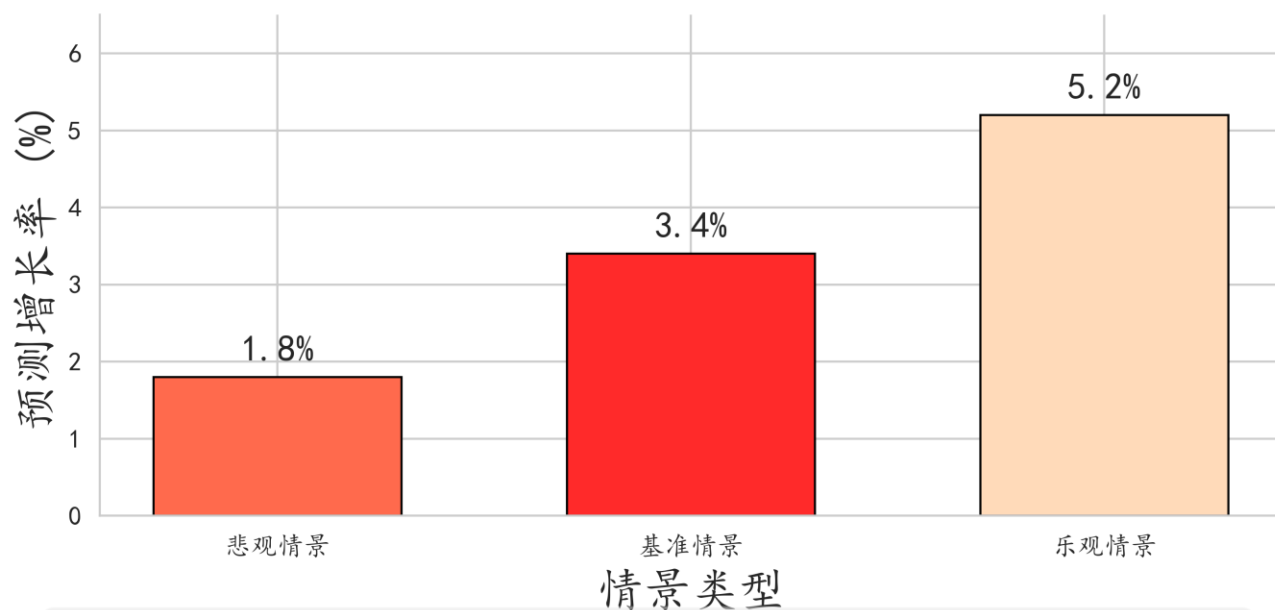

数据来源：情景模拟模型计算结果（基于消费者信心指数、企业商品价格指数等多因子分析）  
注：悲观情景-外部冲击加剧；基准情景-政策保持当前力度；乐观情景-政策加码与环境改善

图表 50：三种情景下需求增长率对比柱状图（数据来源：情景模拟模型计算结果）

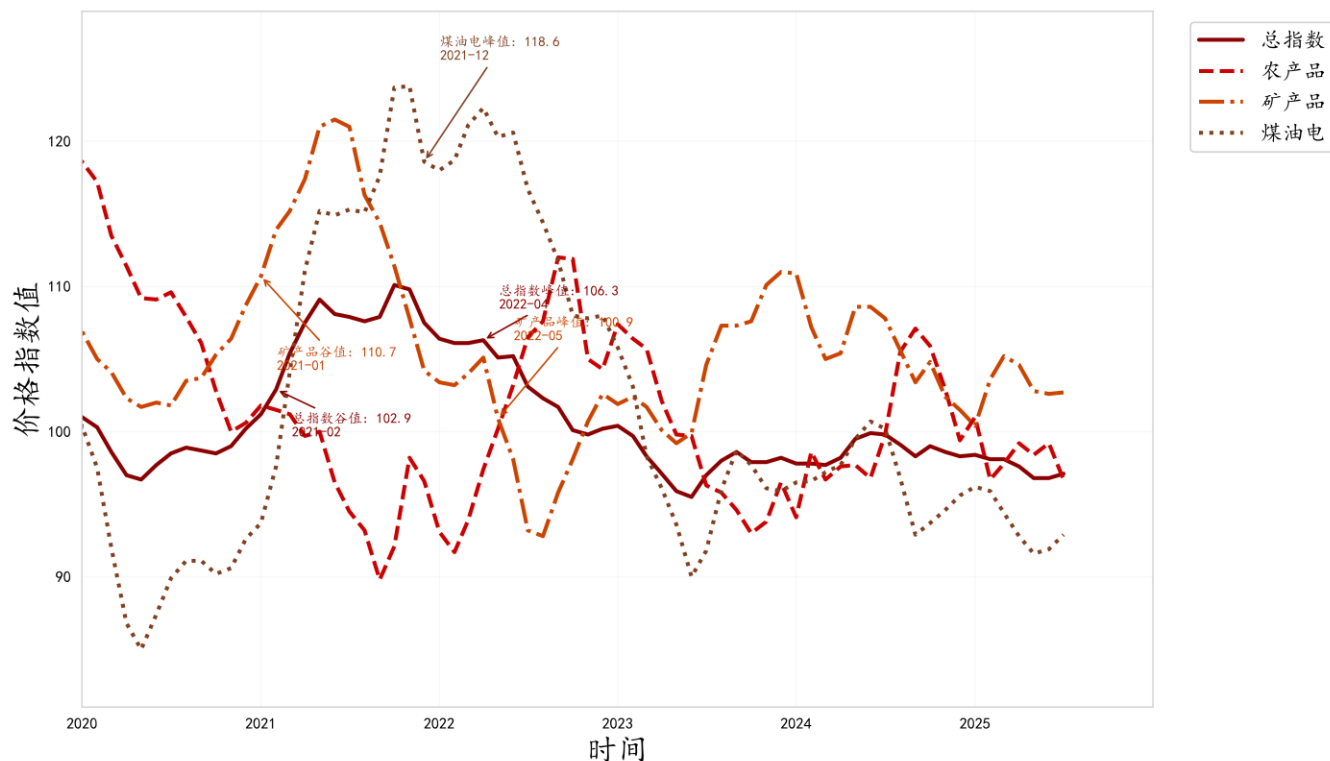

图表 51：原材料价格指数波动趋势图（数据来源：东方财富网企业商品价格指数）

价格波动风险需通过量化工具进行精细化管理的必要性日益凸显。价格风险价值（VaR）分析显示，95%置信度下月度最大价格跌幅为-1.24%，对应净利润损失 3.0%（数据来源：价格风险价值(VaR)分析表格）。这种风险量化结果为企业的套期保值与库存管理提供了科学依据，也是投资者评估行业风险溢价的重要参考。

环保与安全监管政策的持续收紧推高行业合规成本，重塑行业成本结构。环保监管趋严，超低排放改造已使行业平均吨钢环保成本增至 200 元以上，预计 2025-2027 年每年新增合规成本 5-10%。安全监管同样加强，2025 年新《安全生产法》实施，违规处罚金额上限提高至 200 万元，增加了运营风险。这种监管环境的变化，使得合规能力成为企业的核心竞争力之一，也是行业准入的重要壁垒。

### （三）投资特定风险：估值与流动性挑战

投资层面风险涉及市场情绪变化与个体企业表现分化，需警惕周期行业特有的估值陷阱与流动性不足风险。

估值波动受行业周期性与市场情绪驱动明显，存在周期性高估风险。钢铁行业作为典型周期行业，估值常受市场情绪驱动而非基本面支撑。2025 年沪深 300 指数年化波动率为 16.87%（数据来源：新浪财经沪深 300 指数日数据），但钢铁板块波动率更高（约 25%）。当前行业平均

---

市盈率（PE）为 8.5 倍，低于历史中枢（10 倍），但部分龙头企业 PE 已超过 15 倍，存在局部高估风险。政策情景预测显示，如果政策进一步宽松（概率 20%），GDP 增速可能反弹至 5.5-6.0%，或引发短期估值泡沫，但不可持续。

**流动性风险在二级市场表现显著分化，影响投资退出与价格发现功能。** 钢铁股流动性呈现明显分化：龙头股日成交额占比超过 60%，而中小钢企成交稀疏，退出渠道受限。2025 年行业平均换手率仅为 0.8%，低于 A 股平均水平（1.2%），增加减持难度。宏观政策不确定性也可能加剧流动性紧缩，尤其在地缘政治风险升温时。这种流动性结构使得投资者需特别关注投资标的的市场活跃度与资金关注度。

**业绩不达预期风险源于成本传导滞后与需求疲软的双重压力，易触发股价下跌。** 重点企业业绩易受成本传导滞后影响。价格传导模型显示，钢铁行业成本传导率约 65%（数据来源：供应链成本传导模型计算），意味着成本上涨不能完全转嫁。2025 年 Q2 工业品出厂价格指数（PPI）同比下跌 2.9%（数据来源：东方财富工业品出厂价格指数），反映下游需求疲软。如果需求增速低于预期（如房地产投资负增长），企业盈利可能大幅下调，触发股价下跌。这种业绩波动风险要求投资者具备更强的盈利预测与修正能力。

#### **（四）风险矩阵与综合评估**

基于风险发生概率和影响程度的量化评估，为风险优先级排序与资源分配提供科学依据。

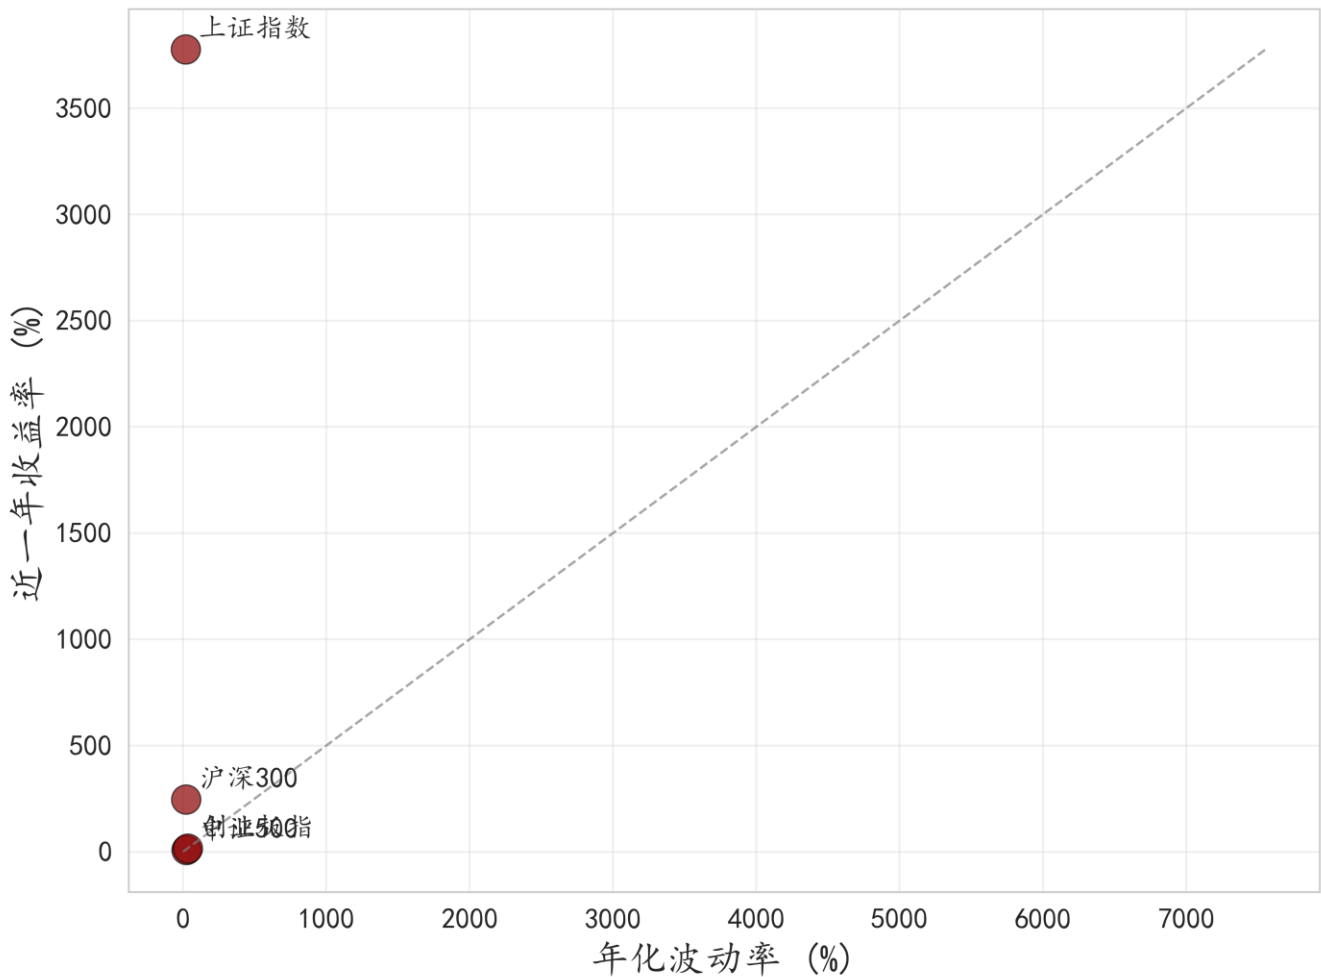

图表 52：主要指数收益风险散点图（数据来源：新浪财经指数数据）

**内部结构性风险位于极高风险区域，需给予最高关注度。** 包括原材料价格波动和监管政策收紧（发生概率 0.7，影响程度 0.9），这些风险因素具有高发生概率与严重影响程度的特征，对企业经营与投资回报构成直接威胁。特别是原材料价格波动风险，由于其频繁发生且影响机制复杂，需建立专门的风险管理团队与应对机制。

**外部环境风险处于高风险区域，需持续监测与防范。** 如汇率利率波动和经济周期下行（发生概率 0.6，影响程度 0.8），这些风险虽然发生概率略低，但一旦发生将产生系统性影响。特别是经济周期下行风险，往往与行业自身周期叠加产生放大效应，需通过宏观研究与行业分析相结合的方式，进行前瞻性预判。

**政策协调风险属于中等风险区域，但不可忽视其潜在影响。** 涉及政策执行不一致（发生概率 0.5，影响程度 0.6），这类风险虽然直接影响相对较小，但可能通过影响政策预期与市场信心产生间接影响。特别是在政策转型期，不同部门政策之间的协调性显得尤为重要。

---

### （五）风险应对策略建议

针对多层次风险特征，企业需采取组合策略实现风险收益最优平衡，投资者需基于风险调整视角进行资产配置。

**短期应对策略聚焦运营效率提升与风险缓冲建设。** 建立价格预警机制，当环比涨幅超过 1% 时启动应急计划；优化库存管理，将缓冲水平从 2-3 个月提升至 4-6 个月。风险应对策略效果评估显示，库存优化管理在效果、成本与难度三个维度上表现均衡（效果 6 分，成本 3 分，难度 4 分；数据来源：风险应对策略效果对比雷达图），是较为实用的短期应对工具。

区域协调发展路径雷达图  
显示各区域发展指标均衡性

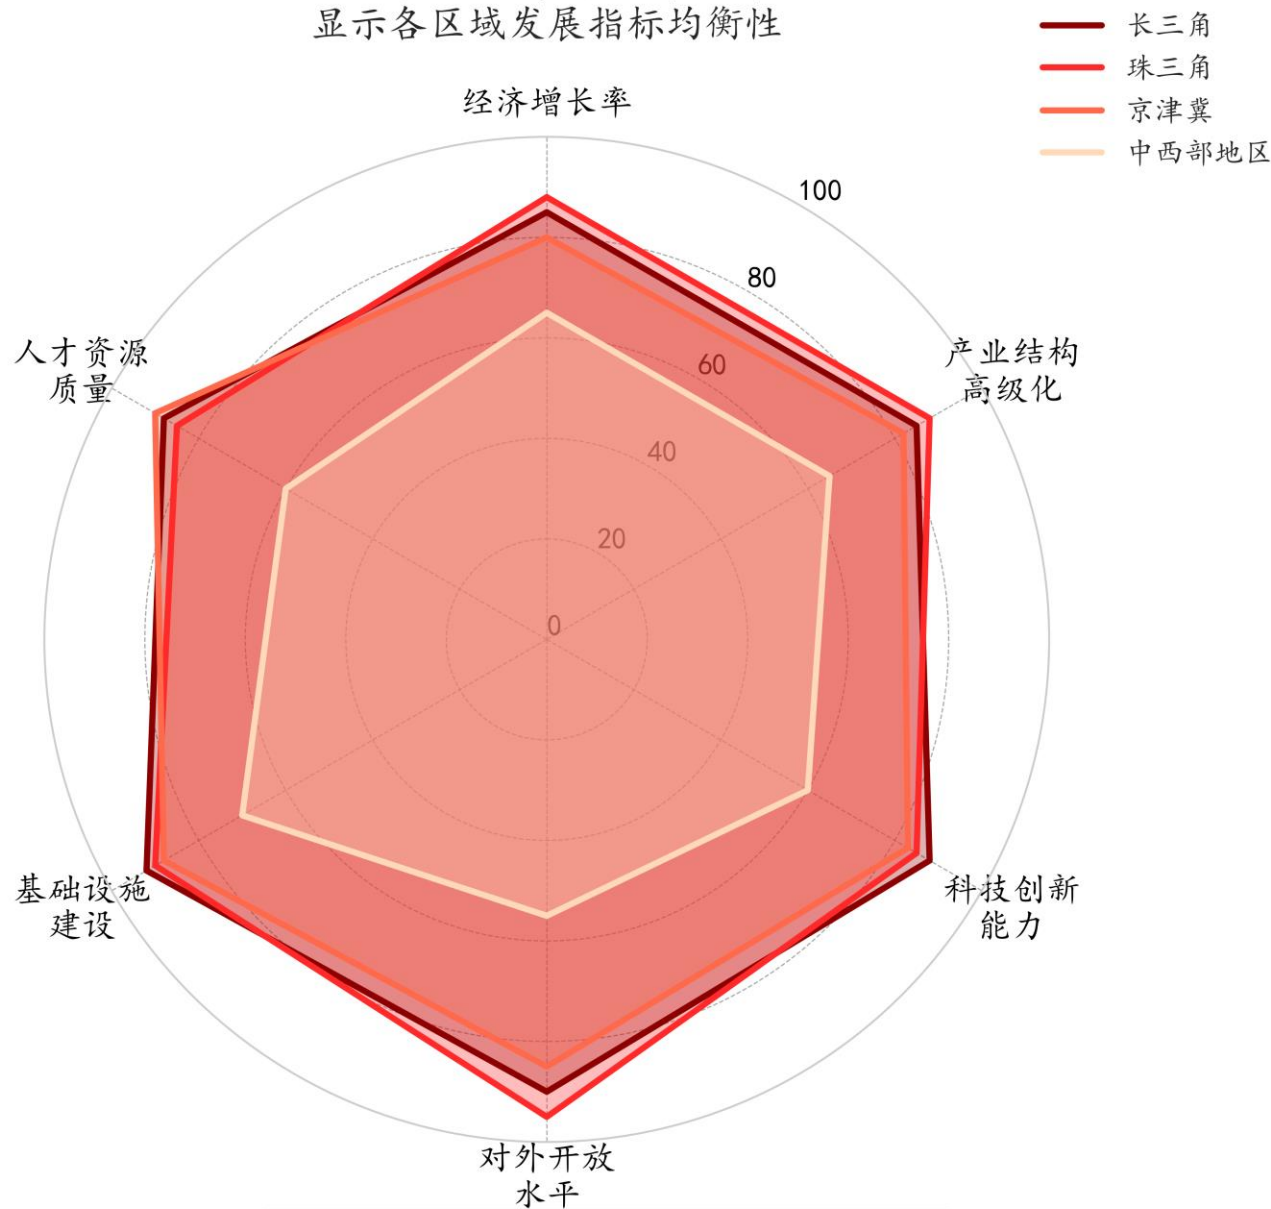

关键洞察：珠三角和长三角在多个指标上表现优异，而中西部地区在科技创新能力和对外开放水平上相对落后

数据来源：2025年区域经济分析报告

图表 53：区域协调发展路径雷达图（数据来源：2025 年区域经济分析报告）

中期策略重点推进供应链优化与成本结构改革。推进供应商多元化，将单一供应商依赖度从当前的 40%+降低至 30%以下；采用长期合约锁定 30-50%的关键原材料价格。同时，通过技术改



---

造提升能源效率与材料利用率，降低单位产品成本。特别是针对铁矿石进口依赖度高的结构性风险，需通过海外资源投资与战略合作等方式建立更为稳定的供应体系。

**长期布局围绕技术升级与绿色转型构建可持续竞争优势。** 投资氢能炼钢技术，布局绿色转型；开发价格对冲工具组合，最优对冲比例 30%。财务模拟显示，全面实施上述策略可将极端情景下的净利润损失从 12.6%降低至 7.2%，提升供应链韧性 42.9%（基于策略效果模拟计算）。这种长期投入虽然前期成本较高，但能够为企业建立持续的竞争壁垒与风险抵御能力。

**投资者应基于风险调整视角进行行业配置与标的选择。** 重点关注成本控制能力强、供应链多元化的龙头企业，避免高估值和低流动性标的。定期监控宏观指标（如 GDP 增长率、PPI）和行业数据（如集中度 CR10），动态调整风险暴露。同时，关注技术变革带来的投资机会，特别是在氢能炼钢、低碳工艺等前沿领域的领先企业。

**2020-2025 年钢铁行业面临多维风险挑战，但也蕴含结构转型与技术升级带来的投资机遇。** 政策环境总体稳健，但结构性挑战不容忽视，建议投资者保持谨慎乐观，强调风险调整后的收益。通过精准的风险识别与主动管理，企业可将风险挑战转化为竞争优势，投资者可获取超越行业平均的投资回报。未来需持续关注行业集中度提升、技术替代进程与绿色转型速度等关键变量，动态调整风险评估与应对策略。

---

## 参考数据来源

1. 东方财富网: 工业增加值增长. <https://data.eastmoney.com/cjsj/gyzjz.html>
2. 东方财富网: 国内生产总值. <http://data.eastmoney.com/cjsj/gdp.html>
3. 12 月宏观经济数据预测\_专题频道\_东方财富网.<https://topic.eastmoney.com/hgyc/>
4. 东方财富网: 消费者信心指数. <https://data.eastmoney.com/cjsj/xfzxx.html>
5. 东方财富网: 规模以上工业增加值年率.  
[https://datacenter.jin10.com/reportType/dc\\_chinese\\_industrial\\_production\\_yoy](https://datacenter.jin10.com/reportType/dc_chinese_industrial_production_yoy)
6. 新浪财经: 沪深 300 指数日数据.  
<https://finance.sina.com.cn/realstock/company/sz000300/nc.shtml>
7. 大成沪深 300 指数 A(519300)\_基金行情\_新浪财经\_新浪网.<http://stocks.sina.cn/fund/?tabsource=cjzwy&code=519300>
8. 2024 年 A 股深度复盘.<https://finance.sina.com.cn/stock/stockzmt/2025-01-04/doc-inecuumu7786290.shtml>
9. 股指期货与现货市场的风险溢出研究.<https://cmjj.ajcass.com/Magazine/Show?ID=88832>
10. 新浪财经: 上证指数日数据.  
<https://finance.sina.com.cn/realstock/company/sz000001/nc.shtml>
11. [西部证券]: 新材料行业系列深度报告一: 新材料行业研究框架- 发现 ....<https://www.fxbaogao.com/detail/4495568>
12. 光大证券搜索结果.<http://www.cfc365.com/a/search/result/index.php?page=1&searchid=7521>
13. 股票频道- 东方财富网.<https://stock.eastmoney.com/>
14. 公司评级\_ 东方财富网.<https://stock.eastmoney.com/a/cgspj.html>
15. 中国概念股\_ 东方财富网.<https://stock.eastmoney.com/a/czggng.html>

- 
16. 板块分析.<https://stock.eastmoney.com/xuexiao/xx523.html>
  17. 东方财富网: 社会消费品零售总额. <http://data.eastmoney.com/cjsj/xfp.html>
  18. 国家数  
据.<https://data.stats.gov.cn/WZWSREL3NIYXJJaC5odG0/cz0lRTclQTQlQkUIRTQlQkMlOUlRlTYlQjYlODglRTglQjQlQjklRTUlOTMlODE=>
  19. 社会消费品零售总额中限上企业(2024 年 12 月)\_四川省统计局.<http://tjj.sc.gov.cn/scstjj/c111995/2025/2/10/a0708016f3d34ee2bd347d236d87cb25.shtml>
  20. 2024 年 12 月份社会消费品零售总额增长 3.7% - 国家统计局.[https://www.stats.gov.cn/sj/zxfb/202501/t20250117\\_1958327.html](https://www.stats.gov.cn/sj/zxfb/202501/t20250117_1958327.html)
  21. 中国消费者信心指数.<https://nsd.pku.edu.cn/xzyj/zsfb/zgxfzxxzs/index.htm>
  22. 2025 年 2 季度消费者信心指数情况\_数据解读\_首都之窗\_北京市人民政府 .....[https://www.beijing.gov.cn/gongkai/shuju/sjjd/202507/t20250717\\_4151665.html](https://www.beijing.gov.cn/gongkai/shuju/sjjd/202507/t20250717_4151665.html)
  23. 2025 年 3 月中国消费者信心指数报告- 北京大学国家发展研究院.<https://www.nsd.pku.edu.cn/xzyj/zsfb/zgxfzxxzs/540744.htm>
  24. 数据公开\_首都之窗\_北京市人民政府门户网站.<https://www.beijing.gov.cn/cs/cs3/cstj/>
  25. 东方财富网: 居民消费价格指数. <http://data.eastmoney.com/cjsj/cpi.html>
  26. 东方财富网: 工业品出厂价格指数. <http://data.eastmoney.com/cjsj/ppi.html>
  27. 东方财富: 企业商品价格指数. <http://data.eastmoney.com/cjsj/qyspjg.html>
  28. 中国东方居 2025 年《财富》中国 500 强第 340 位—中国钢铁新闻网.[http://www.csteelnews.com/qypd/qydt/202507/t20250725\\_102358.html](http://www.csteelnews.com/qypd/qydt/202507/t20250725_102358.html)
  29. CPI 的最新相关消息.<https://www.stats.gov.cn/search/s?qt=CPI>

- 
30. 国内物价运行总体稳定——解读 2024 年 CPI 和 PPI 数据\_部门动态\_中国 ....[https://www.gov.cn/lianbo/bumen/202501/content\\_6997572.htm](https://www.gov.cn/lianbo/bumen/202501/content_6997572.htm)
  31. 国家数据.<https://data.stats.gov.cn/focus.htm>
  32. 2024 年福建省规模以上工业增加值情况.[https://tjj.fujian.gov.cn/xxgk/tjxx/gmysgyyx/202501/t20250122\\_6706481.htm](https://tjj.fujian.gov.cn/xxgk/tjxx/gmysgyyx/202501/t20250122_6706481.htm)
  33. 2024 年 12 月份规模以上工业增加值增长 6.2%\_考核分配\_省国资委.[https://gzw.fujian.gov.cn/zwgk/gzdt/gzjg/tpkh/202501/t20250124\\_6709253.htm](https://gzw.fujian.gov.cn/zwgk/gzdt/gzjg/tpkh/202501/t20250124_6709253.htm)
  34. 【行业深度】洞察 2024：中国粉末冶金行业竞争格局及市场份额（附 ....<https://stock.stockstar.com/IG2025091500013623.shtml>
  35. 【行业深度】洞察 2024：中国煤炭行业竞争格局及市场份额(附市场 ....<https://www.qianzhan.com/analyst/detail/220/240809-46caee42.html>
  36. 【行业深度】2023 年中国不锈钢行业竞争格局及市场份额分析整体 ....<https://bg.qianzhan.com/trends/detail/506/230627-5d234103.html>
  37. 行业深度！2021 年中国零售电商行业竞争格局及市场份额分析市场 ....<https://bg.qianzhan.com/trends/detail/506/220324-17614bc6.html>
  38. 【行业深度】洞察 2024：中国煤炭行业竞争格局及市场份额(附市场 ....<https://finance.sina.com.cn/roll/2024-08-09/doc-inchzpnn2582302.shtml>
  39. 会议纪要- 发现报告.<https://www.fxbaogao.com/category/4>
  40. 网络舆情风险预警报告查看平台（2025 年最新版）\_舆情应对\_蚁坊软件.<https://m.eefung.com/company-news/20250814144616430>
  41. 《钢铁行业产能置换实施办法》解读.<https://policy.mofcom.gov.cn/claw/policyInfo.shtml?id=2885>
  42. 工信部出台钢铁、水泥和玻璃行业产能置换办法\_滚动新闻\_中国政府网.[https://www.gov.cn/xinwen/2018-01/09/content\\_5254533.htm](https://www.gov.cn/xinwen/2018-01/09/content_5254533.htm)
-

- 
43. 工业和信息化部关于印发钢铁行业产能置换实施办法的通知\_国务院 ....[https://www.gov.cn/zhengce/zhengceku/2021-05/07/content\\_5605092.htm](https://www.gov.cn/zhengce/zhengceku/2021-05/07/content_5605092.htm)
  44. 工业和信息化部办公厅关于暂停钢铁产能置换工作的通知-政企通-湖南 ....[http://www.hunan.gov.cn/zqt/zcsd/202408/t20240826\\_33438351.html](http://www.hunan.gov.cn/zqt/zcsd/202408/t20240826_33438351.html)
  45. 信件查看-营口市工业和信息化局.<https://gxj.yingkou.gov.cn/hdjl/021001/021001006/consultationreplydetail.html?infoGuid=58b09c44-44f5-4c6d-8160-fce4fa44e7a6>
  46. 北京大学国家发展研究院.<https://nsd.pku.edu.cn/>
  47. 2025 年全球降解快餐用具原材料行业全景分析与展望研究报告 (2025 ....<https://m.gepresearch.com/104/view-856736-1.html>
  48. 此乃要件請即處理補充通函 2025 年第二次臨時股東會有關包頭鋁業擬 ....<https://www.chalco.com.cn/tzzgx/thygg/202504/P020250403666209553942.pdf>
  49. 重庆润际远东新材料科技股份有限公司.[http://static.sse.com.cn/stock/disclosure/announcement/c/202306/001495\\_20230601\\_6SOG.pdf](http://static.sse.com.cn/stock/disclosure/announcement/c/202306/001495_20230601_6SOG.pdf)
  50. 湘财周期轮动一年持有混合（013623）新发基金详情\_天天基金网.[http://fund.eastmoney.com/data/xininfo\\_013623.html](http://fund.eastmoney.com/data/xininfo_013623.html)
  51. 中国光伏行业协会.<https://www.chinapv.org.cn/>
  52. 2025 中国宏观经济年中论坛在沪举办.[https://econ.sufe.edu.cn/\\_t405/b9/3c/c6905a244028/page.htm](https://econ.sufe.edu.cn/_t405/b9/3c/c6905a244028/page.htm)
  53. 《中国专利密集型产业统计监测报告》正式发布\_部门动态\_中国政府网.[https://www.gov.cn/lianbo/bumen/202410/content\\_6980841.htm](https://www.gov.cn/lianbo/bumen/202410/content_6980841.htm)
  54. 国家知识产权局媒体视点 AI 技术创新跃升，中国全球创新指数排名升至 ....[http://www.cnipa.gov.cn/art/2025/7/10/art\\_55\\_200558.html](http://www.cnipa.gov.cn/art/2025/7/10/art_55_200558.html)

- 
55. 西藏自治区市场监督管理局(西藏自治区知识产权局).<http://amr.xizang.gov.cn/content/scjg/675b98efe4b0843e08ce56f8.htm>
  56. 不确定性冲击、跨国创新合作与中国企业创新.<https://nsd.pku.edu.cn/docs/20250429111102749143.pdf>
  57. 国家知识产权局世界五大知识产权局年度统计报告.<http://www.cnipa.gov.cn/col/col90/index.html>
  58. 人工智能| IBM.<https://www.ibm.com/cn-zh/services/insights/tech-ai>
  59. 2025 年中国经济形势分析与预测王昌林李海舰冯明经济蓝皮书中国 ....<https://xianxiao.ssap.com.cn/book/30305.html>
  60. 中国钢铁工业协会.<https://cacs.mofcom.gov.cn/cacscms/article/sxh?articleId=160741&type=>
  61. 中国钢铁工业发展报告 2024-冶金工业出版社.<https://www.mip1953.com/productinfo/2937360.html>
  62. 中国钢铁工业协会.<https://www.chinaisa.org.cn/gxportal/xfglwap/portal/list.html?columnId=63913b906a7a663f7f71961952b1ddfa845714b5982655b773a62b85dd3b064e>
  63. 欢迎订阅《中国钢铁工业发展报告（2018）》—中国钢铁工业协会.<https://www.chinaisa.org.cn/gxportal/xfglwap/portal/content.html?articleId=6a324d5e0505bff4d6ea3df8cc1c1e2f1c0bfc6204a3ed7e6d3876be38eea185&columnId=ed51af486f6d4b313b3aaf8fea0b32a4a2d4a89714c61992caf01942eb61831b>
  64. Csdri.<http://www.csdri.com.cn/inform?id=598>
  65. 天津市金属材料行业协会预警信息简报 2024 年第 1 期（总第 17 期）.[https://shangwuju.tj.gov.cn/tjsswjzz/ztzl/ztzl/swfzjsgz1/gpmy/yszn/202402/t20240226\\_6544571.html](https://shangwuju.tj.gov.cn/tjsswjzz/ztzl/ztzl/swfzjsgz1/gpmy/yszn/202402/t20240226_6544571.html)
  66. 中国 2012 年能流图和煤流图编制及能源系统效率研究.<https://www.wwfchina.org/content/press/publication/2014/2012energy1031.pdf>

- 
67. 中国钢铁工业协会不锈钢分会.<https://www.cssc.org.cn/page1000043>
  68. 中国钢铁工业协会不锈钢分会.<https://www.cssc.org.cn/>
  69. 公告：2023 年政府部门统计调查项目目录.<https://www.stats.gov.cn/WZWSREL3h4Z2svemZ0amRjeG1zcC9ibXRqZGN4bS8yMDI0MDQvdDIwMjQwNDExXzE5NDg0NzUuaHRtbA==>
  70. 中国钢铁工业协会部门文件.<https://www.chinaisa.org.cn/gxportalFile/attach/2024/11/12/0000000000073374.pdf>
  71. 钢材基础知识与市场概况目录.[https://www.shfe.com.cn/upload/dir\\_2009121/4104\\_2009121.pdf](https://www.shfe.com.cn/upload/dir_2009121/4104_2009121.pdf)
  72. 江苏省生态环境保护督察整改公示（第四十项） - 张家港市生态环境局.<https://www.zjg.gov.cn/zjgszwz/gsgg/202401/f0972f7aeecf451cbbdd68a7298aef6b.shtml>
  73. 金融研究.[http://www.jryj.org.cn/CN/volumn/volumn\\_71.shtml](http://www.jryj.org.cn/CN/volumn/volumn_71.shtml)
  74. 减税降费的价格和福利效应——引入成本传导率的投入产出价格模型 ....<http://www.jryj.org.cn/CN/abstract/abstract839.shtml>
  75. 人民币汇率变动对国内物价的传导研究.<http://journal.bit.edu.cn/sk/cn/article/pdf/preview/10.15918/j.jbitss1009-3370.2015.0312.pdf>
  76. 一文看懂新能源设备制造企业信用风险.[https://www.spgchinaratings.cn/research/pdf/20241030\\_slides\\_new-energy-equipment-manufacturer\\_cn.pdf](https://www.spgchinaratings.cn/research/pdf/20241030_slides_new-energy-equipment-manufacturer_cn.pdf)
  77. 能源价格变动对产业结构调整、收入分配和 CPI 的影响研究.[https://www.cideg.tsinghua.edu.cn/upload\\_files/atta/1443596856109\\_42.pdf](https://www.cideg.tsinghua.edu.cn/upload_files/atta/1443596856109_42.pdf)
  78. 《中国建筑钢结构行业发展报告（2023-2024 年度）》发布：行业稳 ....[http://www.csteelnews.com/xwzx/hydt/202506/t20250623\\_101269.html](http://www.csteelnews.com/xwzx/hydt/202506/t20250623_101269.html)



- 
79. 国家重提能耗目标，钢铁行业“极致能效”亟须攻坚发力—中国钢铁新闻网.[http://www.csteelnews.com/xwzx/djbd/202403/t20240325\\_86196.html](http://www.csteelnews.com/xwzx/djbd/202403/t20240325_86196.html)
  80. 钢铁行业稳增长工作方案.<https://www.gov.cn/zhengce/zhengceku/202308/P020230826443094403805.pdf>
  81. 中国钢铁工业协会.<https://www.chinaisa.org.cn/>
  82. 预见 2023：中国钢铁行业产业链全景、行业政策、行业竞争格局 ....<https://m.chyxx.com/industry/1138037.html>
  83. 中国钢结构协会冷弯型钢分会举办 2024 年钢结构建筑、工程机械用冷 ....[http://www.csteelnews.com/xwzx/hydt/202404/t20240425\\_87414.html](http://www.csteelnews.com/xwzx/hydt/202404/t20240425_87414.html)
  84. 钢结构研究报告\_中国钢结构行业市场前瞻与投资战略规划分析报告 ....<https://bg.qianzhan.com/report/detail/3260357475f64f6e.html>
  85. “十四五”时期我国钢铁产业发展的八大趋势研究| 于都县信息公开.<http://www.yudu.gov.cn/ydxxxgk/c100263gte/202012/1458305c91594c8aab42d2cac91251c3.shtml>
  86. 行业深度！2022 年中国煤炭行业竞争格局及市场份额分析市场集中度 ....<https://bg.qianzhan.com/trends/detail/506/220803-f4f73902.html>
  87. 中国航空难变形金属材料环形锻件行业现状深度调研与发展战略分析 ....<https://www.chinabaogao.com/baogao/202508/760247.html>
  88. 行业集中度数据（2000-2020 年）\_产业集中度数据-CSDN 博客.[https://blog.csdn.net/m0\\_55707520/article/details/124513567](https://blog.csdn.net/m0_55707520/article/details/124513567)
  89. 人形机器人如何重塑钢铁需求？—中国钢铁新闻网.[http://www.csteelnews.com/xwzx/znzz/202503/t20250304\\_97668.html](http://www.csteelnews.com/xwzx/znzz/202503/t20250304_97668.html)
  90. 沙特项目进展如何？宝钢股份半年度业绩说明会速递—中国钢铁新闻网.[http://www.csteelnews.com/qypd/qydt/202509/t20250908\\_103449.html](http://www.csteelnews.com/qypd/qydt/202509/t20250908_103449.html)

- 
91. 我国推进实施钢铁行业超低排放—中国钢铁新闻网.[http://www.csteelnews.com/xwzx/zcfg/201905/t20190507\\_6946.html](http://www.csteelnews.com/xwzx/zcfg/201905/t20190507_6946.html)
  92. 行业深度！2022 年中国钢铁行业竞争格局及市场份额分析市场集中度 ....<https://bg.qianzhan.com/trends/detail/506/221013-1147a519.html>
  93. 中国钢铁工业协会.<https://www.chinaisa.org.cn/gxportal/xfglwap/portal/list.html?columnId=bc04f96807f3838128d4185b6c3f111f7a695c52834adaf6b358b2eacb6ce857>
  94. 中国钢铁工业协会.<https://www.chinaisa.org.cn/gxportal/xfgl/portal/list.html?columnId=50d99531d5dee683466>
  95. 中国钢铁工业协会.<https://www.chinaisa.org.cn/gxportal/xfglwap/portal/list.html?columnId=653d50b633fd1d7dd30b21c3d1130cf27d2c13f14bd4a3ff437b12e7c6afec41>
  96. 宝钢股份 6.92(-0.14%)\_年度报告\_新浪财经\_新浪网.[http://money.finance.sina.com.cn/corp/view/vCB\\_Bulletin.php?stockid=600019&type=list&page\\_type=ndbg](http://money.finance.sina.com.cn/corp/view/vCB_Bulletin.php?stockid=600019&type=list&page_type=ndbg)
  97. 宝钢股份 6.92(-0.14%)\_年度报告\_新浪财经\_新浪网.[https://vip.stock.finance.sina.com.cn/corp/go.php/vCB\\_Bulletin/stockid/600019/page\\_type/zqbg.phtml](https://vip.stock.finance.sina.com.cn/corp/go.php/vCB_Bulletin/stockid/600019/page_type/zqbg.phtml)
  98. 宝钢股份公布国际专利申请：“熔渣粒化方法及装置”-腾讯新闻.<https://news.qq.com/rain/a/20240626A00MWH00>
  99. 研报资讯频道-慧博资讯.[http://p.hibor.org/doceconomy/index\\_news.asp?p=0.7729151&S\\_S=%D0%D0%D2%B5%B7%D6%CE%F6&M\\_M=2&flag=0&liflag=0&page=19](http://p.hibor.org/doceconomy/index_news.asp?p=0.7729151&S_S=%D0%D0%D2%B5%B7%D6%CE%F6&M_M=2&flag=0&liflag=0&page=19)
  100. 全球大宗商品市场走势分析-重庆石油天然气交易中心.<https://www.chinacqpgx.com/hy/shownews?id=12822>
  101. 2024 年中国活性炭产业价值链分析下游应用领域毛利率水平较高【组 ....<https://finance.sina.cn/2024-05-10/detail-inautsin8676137.d.html?from=wap>
-

- 
- 102.2024 年中国覆铜板产业价值链分析覆铜板毛利率水平约为 30%-  
35 ....<https://finance.sina.cn/2024-04-29/detail-inatntzx3020082.d.html?from=wap>
- 103.徐工机械(000425)\_公司公告\_徐工机械：2024 年度环境、社会与治  
理 ....[https://vip.stock.finance.sina.com.cn/corp/view/vCB\\_AllBulletinDetail.php?stockid=000425&id=11041747](https://vip.stock.finance.sina.com.cn/corp/view/vCB_AllBulletinDetail.php?stockid=000425&id=11041747)
- 104.气候变化风险及机遇评估技术指导手册.<https://governance-solutions.com/uploads/20250224/ef69577998adeb55eb47d4583cb0407f.pdf>
- 105.国家金融监督管理总局.<https://www.nfra.gov.cn/cn/view/pages/governmentDetail.html?docId=1199877&itemId=861&generaltype=1>
- 106.2025 年金融工程行业研究：从资产配置走向因子配置，中国版全天候 ....<https://www.vzkoo.com/read/20250605ee45c2473f28b8714a35aae1.html>
- 107.矿产资源供应风险研究进展和前沿.<https://www.resci.cn/CN/10.18402/resci.2023.09.03>
- 108.钢铁企业超低排放改造技术指南.<https://yhp-website.oss-cn-beijing.aliyuncs.com/upload/files/%E9%92%A2%E9%93%81%E4%BC%81%E4%B8%9A%E8%B6%85%E4%BD%8E%E6%8E%92%E6%94%BE%E6%94%B9%E9%80%A0%E6%8A%80%E6%9C%AF%E6%8C%87%E5%8D%97.pdf>
- 109.关于节卡机器人股份有限公司首次公开发行股票并在科创板上市申  
请 ....[https://static.sse.com.cn/stock/disclosure/announcement/c/202507/001798\\_20250718\\_ITHN.pdf](https://static.sse.com.cn/stock/disclosure/announcement/c/202507/001798_20250718_ITHN.pdf)
- 110.国家认监委关于下达《检验检测机构数字化建设指南》等 25 项认  
证 ....[https://amr.sz.gov.cn/xxgk/qt/ztlm/jljcrz/hyzx/content/post\\_11356737.html](https://amr.sz.gov.cn/xxgk/qt/ztlm/jljcrz/hyzx/content/post_11356737.html)
- 111.新发展阶段工业绿色低碳发展路径研究报  
告.<http://www.caict.ac.cn/kxyj/qwfb/bps/202312/P020240326612959632275.pdf>
- 112.工业过程绿色低碳技术.[http://old2022.bulletin.cas.cn/publish\\_article/2022/4/20220410.htm](http://old2022.bulletin.cas.cn/publish_article/2022/4/20220410.htm)
- 113.产品数字护照（DPP）技术发展报  
告.<http://www.caict.ac.cn/kxyj/qwfb/zbtg/202312/P020231229522089939062.pdf>
-

- 
- 114.ENERGY FOUNDATION CHINA  
NEWSLETTER.[https://www.efchina.org/Attachments/Publication%20Attachments/publication-efchina-20240105/%E8%83%BD%E6%BA%90%E5%9F%BA%E9%87%91%E4%BC%9A%E7%AE%80%E6%8A%A5\\_2023-Q3.pdf](https://www.efchina.org/Attachments/Publication%20Attachments/publication-efchina-20240105/%E8%83%BD%E6%BA%90%E5%9F%BA%E9%87%91%E4%BC%9A%E7%AE%80%E6%8A%A5_2023-Q3.pdf)
- 115.关于加快推进人工智能赋能政企数字化转型的提案.<https://www.pds.gov.cn/contents/63296/440074.html>
- 116.上万页深度观察面向 2025 年的数字化转型实践案例数字化改革的投资 ....<https://zhuanlan.zhihu.com/p/358267384>
- 117.2024 中国制造业出海趋势分析- 联晟智达.<https://www.leshines.com/cn/news/detail/1816695278614433794>
- 118.信通院《中国数字经济发展报告（2022 年）》：2021 年我数字经济 ....<https://www.smartcity.team/reports/chinadigitaleconomy2022/>
- 119.专精特新中小企业数字化转型研究报告.<https://www.caict.ac.cn/english/research/whitepapers/202503/P020250326492900474177.pdf>
- 120.解码 2025 中国健康消费市场新趋势与快消品行业变革全景分析- 知乎.<https://zhuanlan.zhihu.com/p/1924162459025019667>
- 121.2025 年零售行业分析.<https://www.lhratings.com/file/fe0d7740b23.pdf>
- 122.中国建设银行股份有限公司 2024 年可持续发展报告.<http://www.ccb.com/cn/html1/office/ebank/dsh/kcxA.pdf>
- 123.供需两侧发力激发消费引擎——首季中国经济一线调研报告.[https://www.gov.cn/yaowen/liebiao/202504/content\\_7019497.htm](https://www.gov.cn/yaowen/liebiao/202504/content_7019497.htm)
- 124.中国到底需要多少钢？面向 2050 年中国和全球钢铁需求预测-和讯网.<http://futures.hexun.com/2025-06-27/219849854.html>
- 125.2024 年螺纹钢产业联盟年会暨棒线材高质量发展工艺技术创新交流会 ....[http://www.csteelnews.com/xwzx/jrrd/202406/t20240628\\_89651.html](http://www.csteelnews.com/xwzx/jrrd/202406/t20240628_89651.html)
-

- 
126. 并购重组风起云涌！我国钢企产业集中度向 2025 目标冲刺- 法律观察 ....<https://www.allbrightlaw.com/CN/10531/d3a6cfc242517a28.aspx>
127. 第三届中国焦化行业科技大会暨中国炼焦行业协会八届四次常务理事 ....<https://www.cnljxh.com/wap/news/show.php?id=749>
128. 深圳证监局上市公司监管通讯.[http://www.csrc.gov.cn/shenzhen/c101531/c7563496/7563496/files/%E6%B7%B1%E5%9C%B3%E8%AF%81%E7%9B%91%E5%B1%80%E4%B8%8A%E5%B8%82%E5%85%AC%E5%8F%B8%E7%9B%91%E7%AE%A1%E9%80%9A%E8%AE%AF\(%202025%E5%B9%B4%E7%AC%AC1%E6%9C%9F\).pdf](http://www.csrc.gov.cn/shenzhen/c101531/c7563496/7563496/files/%E6%B7%B1%E5%9C%B3%E8%AF%81%E7%9B%91%E5%B1%80%E4%B8%8A%E5%B8%82%E5%85%AC%E5%8F%B8%E7%9B%91%E7%AE%A1%E9%80%9A%E8%AE%AF(%202025%E5%B9%B4%E7%AC%AC1%E6%9C%9F).pdf)
129. 中国上市公司协会—中国上市公司 2024 年经营业绩报告.[https://www.capco.org.cn/sjfb/dytj/202505/20250512/j\\_2025051214042700017470299884234849.html](https://www.capco.org.cn/sjfb/dytj/202505/20250512/j_2025051214042700017470299884234849.html)
130. 产业主导、国资开路，启动并购黄金时代.<https://aigc.idigital.com.cn/djyanbao/%E3%80%90%E5%9B%BD%E5%85%83%E8%AF%81%E5%88%B8%E3%80%91%E5%B9%B6%E8%B4%AD%E9%87%8D%E7%BB%84%E7%B3%BB%E5%88%97%E6%8A%A5%E5%91%8A%EF%BC%88%E4%BA%8C%EF%BC%89%EF%BC%9A%E4%BA%A7%E4%B8%9A%E4%B8%BB%E5%AF%BC%E3%80%81%E5%9B%BD%E8%B5%84%E5%BC%80%E8%B7%AF%EF%BC%8C%E5%90%AF%E5%8A%A8%E5%B9%B6%E8%B4%AD%E9%BB%84%E9%87%91%E6%97%B6%E4%BB%A3-2025-01-25.pdf>
131. 熊力权益合伙人重庆业务领域：中国内地资本市场,投资并购和公司 ....<https://www.zhonglun.com/team/xiongli.html>
132. 问诊 2016 年- 中国钢铁行业去产能.<https://www.greenpeace.org.cn/wp-content/uploads/2017/02/%E7%BB%BF%E8%89%B2%E5%92%8C%E5%B9%B3%E6%8A%A5%E5%91%8A%EF%BC%9A%E9%97%AE%E8%AF%8A2016%E9%92%A2%E9%93%81%E5%8E%BB%E4%BA%A7%E8%83%BD.pdf>
133. 钢铁工业协会何文波：中国计划 2025 年前完成 80%钢铁产能超低排放 ....<https://www.stcn.com/article/detail/1004229.html>
134. 2024 年二季度全国规模以上工业产能利用率为 74.9% - 国家统计局.[https://www.stats.gov.cn/sj/zxfb/202407/t20240715\\_1955616.html](https://www.stats.gov.cn/sj/zxfb/202407/t20240715_1955616.html)
-

- 
- 135.2024 年四季度全国规模以上工业产能利用率为 76.2% - 国家统计局.[https://www.stats.gov.cn/sj/zxfb/202501/t20250117\\_1958324.html](https://www.stats.gov.cn/sj/zxfb/202501/t20250117_1958324.html)
- 136.2024 年三季度全国规模以上工业产能利用率为 75.1%\_考核分配\_省 ....[https://gzw.fujian.gov.cn/zwgk/gzdt/gzjg/tpkh/202410/t20241030\\_6555920.htm](https://gzw.fujian.gov.cn/zwgk/gzdt/gzjg/tpkh/202410/t20241030_6555920.htm)
- 137.多行业反内卷进行时—中国钢铁工业协会.<https://www.chinaisa.org.cn/gxportal/xfgl/portal/content.html?articleId=9960f2109d9805887d99b1df1959cce05564254518e9ecdd0c3fbbb3002abf15&columnId=ae2a3c0fd4936acf75f4aab6fadd08bc6371aa65bdd50419e74b70d6f043c473>
- 138.2024 年全国煤炭开采和洗选业产能利用率为 72.8% - 煤炭产量-CCTD ....<https://www.cctd.com.cn/show-361-247891-1.html>
- 139.《钢铁工业发展规划（2016-2020 年）》.<https://www.ndrc.gov.cn/fggz/fzzlgh/gjjzxgh/201706/W020191104624310009258.doc>
- 140.半导体行业投融资常见法律问题探析——不同经营模式下法律尽职 ....<https://www.zhonglun.com/research/articles/52350.html>
- 141.盛禾生物：核心产品商业化价值有限研发投入强度行业垫底| 18A 药企 ....<https://finance.sina.com.cn/stock/observe/2025-07-18/doc-inffwpws0940769.shtml>
- 142.2025 上海衍生品市场论坛.[https://www.shfe.com.cn/index/othercontents/2025\\_SDMF/](https://www.shfe.com.cn/index/othercontents/2025_SDMF/)
- 143.中国钢铁工业协会秘书长姜维：建议欧盟 CBAM 采信我国钢铁行业 ....<http://www.igea-un.org/cms/show-6812.html>
- 144.学校频道- 东方财富网.<https://stock.eastmoney.com/xuexiao/xx536.html>
- 145.河北省冶金行业协会.<http://www.hebyjxh.com/detail.html?id=2361>
- 146.2025 年度钢铁行业“可持续发展优胜者企业”称号表彰名单发布—中国 ....[http://www.csteelnews.com/xwzx/hydt/202504/t20250409\\_98763.html](http://www.csteelnews.com/xwzx/hydt/202504/t20250409_98763.html)
- 147.2025 年豆包关键词排名优化公司推荐：十大专业服务商助力企业 AI ....<https://mtz.china.com/touzi/2025/0911/189860.html>
-

- 
148. 未来制造业竞争的本质是人才生态系统的竞争.<https://www.ccpit.org/a/20250710/20250710bmdm.html>
149. 【行业深度】洞察 2024：中国金属采矿行业竞争格局及市场份额  
(附 ....<https://bg.qianzhan.com/trends/detail/506/241030-e4ec21fc.html>)
150. 中国煤炭运销协会工作简报(第 171 期) - 工作简报- CCTD 中国煤炭市场网.<https://www.cctd.com.cn/show-70-238060-1.html>
151. 研究报告| 钢铁行业发债企业信用分析.[https://www.spgchinaratings.cn/research/articles/2020-08-20-steel-issuers\\_cn](https://www.spgchinaratings.cn/research/articles/2020-08-20-steel-issuers_cn)
152. 2020 年中国硅钢市场分析报告-市场现状与发展规划趋势.<https://m.chinabaogao.com/detail/479855.html>
153. 2025 年中国宠物行业市场报告——“它经济”的消费升级与市场洞察.<https://kpmg.com/cn/zh/home/insights/2025/06/2025-china-pet-industry-market-report.html>
154. 沙钢股份[002075]-公司公告-大视野.[https://dashiyetouzi.com/tools/company\\_finance\\_announcement.php?stock\\_id=002075](https://dashiyetouzi.com/tools/company_finance_announcement.php?stock_id=002075)
155. 中兴通讯“霸榜”中国创新企业 100 强 AI 注入强劲动力.<https://www.stcn.com/article/detail/3342292.html>
156. 地方知识产权公共服务平台.<https://www.gov.cn/zhengce/zhengceku/202503/P020250311436240342228.xlsx>
157. 华为专利申请全球“遥遥领先”，中国企业掌握世界话语权了吗？ - 专  
业 ....<https://www.allbrightlaw.com/CN/10475/e0fa587577f2e0fd.aspx>
158. 中国氟化工行业氢氟烃（HFCs）逐步削减趋势研究.<https://www.efchina.org/Attachments/Report/report-20170710-3/report-20170710-3>
159. 国家知识产权局媒体视点三组数据背后的企业科技创新动向（经济参  
考 ....[http://www.cnipa.gov.cn/art/2024/11/11/art\\_55\\_196023.html](http://www.cnipa.gov.cn/art/2024/11/11/art_55_196023.html))
-



- 
- 160.物产中大集团股份有限公司 2024 年年度报告摘要.[http://file.finance.sina.com.cn/211.154.219.97:9494/MRGG/CNSESH\\_STOCK/2025/2025-4/2025-04-29/11037846.PDF](http://file.finance.sina.com.cn/211.154.219.97:9494/MRGG/CNSESH_STOCK/2025/2025-4/2025-04-29/11037846.PDF)
- 161.君合助力中国宝武钢铁集团有限公司及其四家子公司完成 ISO 37301 合 ....<https://www.junhe.com/deals/750?locale=zh>
- 162.钢铁行业发债企业信用分析.[https://www.spgchinaratings.cn/research/articles/20231017\\_commentary\\_steel-industry\\_cn](https://www.spgchinaratings.cn/research/articles/20231017_commentary_steel-industry_cn)
- 163.王炸来了！宝武钢铁集团负债 6800 亿元，年利润 316 亿全球第二|财圈社.<https://www.caiquanshe.com/detail/25568.html>
- 164.首钢股份(000959)公司公告\_首钢股份：2024 年年度报告新浪财经 ....[https://vip.stock.finance.sina.com.cn/corp/view/vCB\\_AllBulletinDetail.php?stockid=000959&id=10893260](https://vip.stock.finance.sina.com.cn/corp/view/vCB_AllBulletinDetail.php?stockid=000959&id=10893260)
- 165.鞍钢股份 2.67(-0.37%)\_年度报告\_新浪财经\_新浪网.[https://vip.stock.finance.sina.com.cn/corp/go.php/vCB\\_Bulletin/stockid/000898/page\\_type/ndbg.phtml](https://vip.stock.finance.sina.com.cn/corp/go.php/vCB_Bulletin/stockid/000898/page_type/ndbg.phtml)
- 166.鞍钢集团有限公司可持续发展报告.<http://www.ansteel.cn/d/file/kechixufazhan/kechixufazhanbaogao/2024-07-24/b28487281f426071eddf7b108aaccdd.pdf>
- 167.鞍钢股份有限公司 2024 年年度报告摘要.<http://static.cninfo.com.cn/finalpage/2025-03-31/1222950849.PDF>
- 168.本钢板材(000761)公司公告\_本钢板材：2024 年年度报告新浪财经 ....[https://money.finance.sina.com.cn/corp/view/vCB\\_AllBulletinDetail.php?stockid=000761&id=10848336](https://money.finance.sina.com.cn/corp/view/vCB_AllBulletinDetail.php?stockid=000761&id=10848336)
- 169.集团简介.<https://www.hbisco.com/about/introduce>
- 170.中国二氧化碳捕集利用与封存（CCUS） 年度报告（2023） .<https://www.acca21.org.cn/UploadFiles/file/20230713/638248438536661002/%E4%B8%AD%E5%9B%BD%E4%BA%8C%E6%B0%A7%E5%8C%96%E7%A2%B3%E6%8D%95%E9%9B%86%E5%88%A9%E7%94%A8%E4%B8%8E%E5%B0%81%E5%AD>
-

---

%98%E5%B9%B4%E5%BA%A6%E6%8A%A5%E5%91%8A%EF%BC%882023%EF%B  
C%89.pdf

171.河钢集团有限公司- 意向合作企业.<https://www.acem.sjtu.edu.cn/crdc/85379.html>

172.河钢资源股份有限公司 2024 年年度报告摘  
要.<http://news.10jqka.com.cn/field/sn/20250425/51861745.shtml>

173.长信沪深 300 指数增强 A(005137)基金净值\_估值\_行情走势—天天基金  
网.<http://fundact.eastmoney.com/fundinfo/005137.html?fund=005137&spm=100002001.mw>

174.外资金融机构：当前中国股市估值合理投资者对后市普遍乐观- 生物  
通.<https://www.ebiotrade.com/newsf/2025-9/20250906082432893.htm>

175.外资金融机构：当前中国股市估值合理投资者对后市普遍乐  
观.[http://sjt.guizhou.gov.cn/xwzx/szyw/202509/t20250905\\_88571955.html](http://sjt.guizhou.gov.cn/xwzx/szyw/202509/t20250905_88571955.html)

176.ESG 洞察：欧盟 ESRS 对我国企业的影响.<https://app.cibresearch.com/shareUrl?name=402388a089be9a2b0189f2db1d3b59d2>

177.2025  
ESG.[https://cn.ceibs.edu/sites/portal.prod1.dpmgr.ceibs.edu/files/2025ESG\\_White\\_Paper\\_CN.pdf](https://cn.ceibs.edu/sites/portal.prod1.dpmgr.ceibs.edu/files/2025ESG_White_Paper_CN.pdf)

178.中国制造业数字化转型研究报  
告.<https://lczxqy.com/upload/files/2023/0318/202303180415165267.pdf>

179.最新洞见.<https://www.mckinsey.com.cn/insights/>

180.2015 年中国钢铁行业运行情况—中国钢铁工业协  
会.<https://www.chinaisa.org.cn/gxportal/xfglwap/portal/content.html?articleId=a7754ad4f7a28b7300f45b472477c53169e26bb545f9163a33f3c3f7bd07acdc&columnId=11ea370f565c6c141b1a4dac60aa00c4331bd442382a5dd476a5e73e001b773c>

181.加速首批突破性近零碳钢铁. 投资与部署——中国篇.<https://rmi.org.cn/wp-content/uploads/2024/11/1119%E5%8A%A0%E9%80%9F%E9%A6%96%E6%89%B9%E7%AA%81%E7%A0%B4%E6%80%A7%E8%BF%91%E9%9B%B6%E7%A2%B3%E9%92%A2%E9%93%81->

---

%E6%8A%95%E8%B5%84%E4%B8%8E%E9%83%A8%E7%BD%B2%E2%80%94%E2%80%94%E4%B8%AD%E5%9B%BD%E7%AF%87.pdf

182. 冶金、建材重点行业严格能效约束推动节能降碳行动方案  
(2021 ...<https://www.gov.cn/zhengce/zhengceku/2021-10/22/5644224/files/d95c2c675afb42bbab2dc3bfb72c4986.pdf>
183. 中国建设银行-备战股指期货.[https://m.ccb.com/chn/2010-03/10/article\\_2021082106133832527.shtml](https://m.ccb.com/chn/2010-03/10/article_2021082106133832527.shtml)
184. “市值管理”时代来了，上市公司有哪些招可以用？<https://wallstreetcn.com/articles/3728817>
185. 市值管理重估央国企- 21 经济网.<https://www.21jingji.com/article/20241123/herald/dcff14f3eb670305351979e99e8fd6a9.html>
186. A 股市值管理 50 强揭晓，八成个股获机构密集“唱多”.<https://www.stcn.com/article/detail/1765095.html>
187. 关于印发《钢铁行业节能降碳专项行动计划》的通知- 碳中和网.<https://www.ccn.ac.cn/policies-and-regulations/energy-saving-and-emission-reduction/2159.html>
188. 29 家中国钢企上榜中国宝武位居榜首—中国钢铁新闻网.[http://www.csteelnews.com/xwzx/gjgt/202106/t20210611\\_51198.html](http://www.csteelnews.com/xwzx/gjgt/202106/t20210611_51198.html)
189. 国家知识产权局年度报告.<https://www.cnipa.gov.cn/col/col94/index.html>
190. 科技战略情报实践与思考.<http://nytsqb.aiijournal.com/CN/abstract/abstract22345.shtml>
191. 钢铁行业超低排放政策实施的费用效益预评估研究-Cost-Benefits Pre ....[http://zhghjgl.ijournals.cn/ch/reader/view\\_abstract.aspx?file\\_no=20220506](http://zhghjgl.ijournals.cn/ch/reader/view_abstract.aspx?file_no=20220506)
192. 2025 年，国企上市公司市值管理跨入新阶段，1+1+3 政策路径- 深度 ....<https://www.zhizhengce.com/articles/6768c10980608d0f2d0c6d92>

- 
- 193.政策追踪金融监管央行与监管机构政策追踪| 2024 年 4 月.<https://mgflab.nsd.pku.edu.cn/qyzz/3ae324b715524e08a861395729539b48.htm>
- 194.碳边境调节机制：进展与前瞻.<https://www.igdp.cn/wp-content/uploads/2021/07/%E7%A2%B3%E8%BE%B9%E5%A2%83%E8%B0%83%E8%8A%82%E6%9C%BA%E5%88%B6%EF%BC%9A%E8%BF%9B%E5%B1%95%E4%B8%8E%E5%89%8D%E7%9E%BB.pdf>
- 195.欧盟碳边境调节机制对我国的影响及应对策略\_碳排放交易网——全球 ....<http://www.tanpaifang.com/tanshui/2025/0113/110280.html>
- 196.欧盟开启“碳关税”征收对出口企业影响有多大以及如何应对？ - CBAM ....<https://www.ditan.com/carbon/cbam/4465.html>
- 197.欧盟碳边境调节机制对中国经济的影响.<http://iggd.ruc.edu.cn/yjcg/7321f141178344028e8226785526e1f4.htm>
- 198.欧盟 CBAM 大家谈 03|中国钢铁工业协会秘书长姜维：建议欧盟 CBAM ....<http://www.igea-un.org/cms/show-6812.html>
- 199.时隔四年，工信部再度叫停国内钢铁产能置换.<https://stcn.com/article/detail/1295786.html>
- 200.行业下行顺势清赛道，工信部“急刹”钢铁产能置换\_国内行业动态\_省 ....[https://gxt.fujian.gov.cn/zwgk/xw/hydt/xydt/202409/t20240914\\_6522483.htm](https://gxt.fujian.gov.cn/zwgk/xw/hydt/xydt/202409/t20240914_6522483.htm)
- 201.暂停钢铁产能置换传递的讯号——中国钢铁新闻网.[http://www.csteelnews.com/xwzx/jrrd/202408/t20240828\\_92146.html](http://www.csteelnews.com/xwzx/jrrd/202408/t20240828_92146.html)
- 202.重磅！工信部：暂停钢铁产能置换——中国钢铁新闻网.[http://www.csteelnews.com/xwzx/jrrd/202408/t20240826\\_92023.html](http://www.csteelnews.com/xwzx/jrrd/202408/t20240826_92023.html)
- 203.生态环境部等 5 部门联合发布《关于推进实施钢铁行业超低排放的意见》 ....<https://www.chndaqi.com/news/291033.html>
- 204.生态环境部应对气候变化司相关负责人就《2023、2024 年度全国碳 ....[https://www.mee.gov.cn/ywdt/zbft/202410/t20241021\\_1089827.shtml](https://www.mee.gov.cn/ywdt/zbft/202410/t20241021_1089827.shtml)
-

- 
- 205.双碳背景下内蒙古自治区钢铁行业转型路径分析.<https://www.igdp.cn/wp-content/uploads/2023/04/%E5%86%85%E8%92%99%E9%92%A2%E9%93%81%E9%83%9C%E5%AD%A6.pdf>
- 206.全国碳市场信息网-全国碳市场扩容，要打通哪些关键堵点？.<https://www.cets.org.cn/zjsj/6760.jhtml>
- 207.【专家解读之一|深入实施节能降碳专项行动推动钢铁行业绿色低碳高 ....[https://www.ndrc.gov.cn/xxgk/jd/jd/202406/t20240607\\_1386802.html](https://www.ndrc.gov.cn/xxgk/jd/jd/202406/t20240607_1386802.html)
- 208.共享社会经济路径下中国碳中和路径预测.<https://www.geog.com.cn/CN/10.11821/dlxb202209004>
- 209.“双碳”目标下交通运输业碳排放脱钩效应与峰值预测.<https://transport.chd.edu.cn/article/doi/10.19818/j.cnki.1671-1637.2024.04.008>
- 210.高质量发展下中国旅游业“双碳”目标：评估预测、主要挑战与实现路径.<https://www.zgstly.net/CN/10.12342/zgstly.20210084>
- 211.中国未来人口结构情景分析.<https://www.efchina.org/Attachments/Report/report-iccp-20230309/%E4%B8%AD%E5%9B%BD%E6%9C%AA%E6%9D%A5%E4%BA%BA%E5%8F%A3%E7%BB%93%E6%9E%84%E6%83%85%E6%99%AF%E5%88%86%E6%9E%90.pdf>
- 212.2017 年 7 月挖掘机械行业市场分析报告.<http://www.czjjsc.com/content/?606.html>
- 213.我国高硼硅玻璃行业现状分析：供给端仍不足市场处于竞争型格局.<https://m.chinabaogao.com/detail/735835.html>
- 214.生态环境部对外合作与交流中心.<http://www.fecomee.org.cn/>
- 215.宁夏回族自治区生态环境厅.<https://sthjt.nx.gov.cn/>
- 216.关于开展 2024 年钢铁行业重点场景数字化转型需求和典型案例征集的 ....<https://www.chinaisa.org.cn/gxportalFile/attach/2024/08/14/0000000000073098.pdf>
-

- 
217. 中华人民共和国国家生态环境标准.<https://www.mee.gov.cn/ywgz/fgbz/bz/bzwb/dqhjbh/dqgdwrywrwpfbz/202503/W020250311568405304580.pdf>
218. 专家观点\_钢材市场行情分析\_兰格钢铁网.[https://www.lgmi.com/guanshi/gs\\_LL1\\_list.htm](https://www.lgmi.com/guanshi/gs_LL1_list.htm)
219. 一文了解欧盟碳边境调节机制（CBAM）对出口企业的影响范围与应对 ....<https://www.sgsgroup.com.cn/zh-cn/news/2023/12/cbam-carbon-border-adjustment-mechanism-one-stop-solution>
220. 2024 中国钢铁行业进出口情况分析钢铁产品以出口为主【组图】\_经济 ....<https://www.qianzhan.com/analyst/detail/220/250123-b225fc30.html>
221. 钢铁出口面临严峻挑战，中钢协表示满足内需依然是行业基本定位.<https://m.bjnews.com.cn/detail/1745926567129088.html>
222. 中钢协：一季度钢铁行业经济效益同比改善\_\_中国政府网.[https://www.gov.cn/yaowen/liebiao/202504/content\\_7021817.htm](https://www.gov.cn/yaowen/liebiao/202504/content_7021817.htm)
223. 2024 年度 Wind 中国上市公司 ESG 最佳实践 100 强，这两家钢企上榜 ....[http://www.csteelnews.com/xwzx/hydt/202410/t20241023\\_93759.html](http://www.csteelnews.com/xwzx/hydt/202410/t20241023_93759.html)
224. 2024 上市公司可持续发展最佳实践案例名单.<https://capcofile.oss-cn-beijing.aliyuncs.com/2024/file/GwFj/2024%E4%B8%8A%E5%B8%82%E5%85%AC%E5%8F%B8%E5%8F%AF%E6%8C%81%E7%BB%AD%E5%8F%91%E5%B1%95%E6%9C%80%E4%BD%B3%E5%8F%8A%E4%BC%98%E7%A7%80%E5%AE%9E%E8%B7%B5%E6%A1%88%E4%BE%8B%E5%90%8D%E5%8D%95.pdf>
225. 客户案例-8600+企业成功案例-工业安全生产数字化转型- 润吧云.<http://www.runbayun.com/cases/>
226. 年度报告.[https://ir.cmbc.com.cn/media/b0rpek4i/600016\\_%E6%B0%91%E7%94%9F%E9%93%B6%E8%A1%8C\\_2025-03-29\\_%E6%B0%91%E7%94%9F%E9%93%B6%E8%A1%8C-%E4%B8%AD%E5%9B%BD%E6%B0%91%E7%94%9F%E9%93%B6%E8%A1%8C2024%E5%B9%B4%E5%B9%B4%E5%BA%A6%E6%8A%A5%E5%91%8A.pdf](https://ir.cmbc.com.cn/media/b0rpek4i/600016_%E6%B0%91%E7%94%9F%E9%93%B6%E8%A1%8C_2025-03-29_%E6%B0%91%E7%94%9F%E9%93%B6%E8%A1%8C-%E4%B8%AD%E5%9B%BD%E6%B0%91%E7%94%9F%E9%93%B6%E8%A1%8C2024%E5%B9%B4%E5%B9%B4%E5%BA%A6%E6%8A%A5%E5%91%8A.pdf)
227. 碳中和背景下中国钢铁行业低碳发展路径.<http://zghjgl.ijournal.cn/html/zghjgl/2022/1/20220107.htm>
-

- 
- 228.“中国加速迈向碳中和”钢铁篇：钢铁行业碳减排路径—McKinsey ....<https://www.mckinsey.com.cn/%E4%B8%AD%E5%9B%BD%E5%8A%A0%E9%80%9F%E8%BF%88%E5%90%91%E7%A2%B3%E4%B8%AD%E5%92%8C%E9%92%A2%E9%93%81%E7%AF%87%E7%BC%9A%E9%92%A2%E9%93%81%E8%A1%8C%E4%B8%9A%E7%A2%B3%E5%87%8F%E6%8E%92/>
- 229.碳中和目标下中国钢铁行业碳减排的资源环境影响.<https://www.resci.cn/fileup/1007-7588/PDF/1716969219000-718724409.pdf>
- 230.碳市场前沿| 麦肯锡：钢铁行业碳减排路径——中国环境网.<http://www.cenews.com.cn/news.html?aid=172602>
- 231.2023 能源数据.<https://www.igdp.cn/wp-content/uploads/2024/06/China-Energy-Data-2023.pdf>
- 232.工业和信息化部装备工业发展中心工信要闻国新办就 2025 年上半年 ....[https://www.miit-eidc.org.cn/art/2025/7/19/art\\_2011\\_11563.html](https://www.miit-eidc.org.cn/art/2025/7/19/art_2011_11563.html)
- 233.【工业和信息化部：工业和信息化领域节能降碳取得积极进展】-国家 ....[https://www.ndrc.gov.cn/xwdt/ztl/2025qgjnxcz/bnjncx/202506/t20250613\\_1398426.html](https://www.ndrc.gov.cn/xwdt/ztl/2025qgjnxcz/bnjncx/202506/t20250613_1398426.html)
- 234.【国家发展改革委、工业和信息化部等部门就 2024 年粗钢产量调控 ....[https://www.ndrc.gov.cn/fzggw/jgsj/cys/sjdt/202404/t20240403\\_1365488.html](https://www.ndrc.gov.cn/fzggw/jgsj/cys/sjdt/202404/t20240403_1365488.html)
- 235.工业和信息化部国家发展改革委科技部财政部应急管理部关于印发 ....[https://www.mem.gov.cn/gk/zfxxgkpt/fdgdgknr/202310/t20231013\\_465476.shtml](https://www.mem.gov.cn/gk/zfxxgkpt/fdgdgknr/202310/t20231013_465476.shtml)
- 236.2024 年中国不锈钢产量达 3944.11 万吨同比增长 7.54%.[https://www.csm.org.cn/col/col6371/art/2025/art\\_1579721264.html](https://www.csm.org.cn/col/col6371/art/2025/art_1579721264.html)
- 237.2024 年中国不锈钢产量达 3944.11 万吨同比增长 7.54%—中国钢铁 ....[http://www.csteelnews.com/xwzx/hydt/202501/t20250123\\_96785.html](http://www.csteelnews.com/xwzx/hydt/202501/t20250123_96785.html)
- 238.世界钢铁协会- 维基百科，自由的百科全书.<https://zh.wikipedia.org/zh-hans/%E4%B8%96%E7%95%8C%E9%92%A2%E9%93%81%E5%8D%8F%E4%BC%9A>
-



- 
- 239.世界钢铁协会：2023 年全年全球粗钢产量为 18.882 亿吨.<https://news.cnstock.com/news,bwqx-202401-5183891.htm>
- 240.世界钢铁协会：2024 年 9 月全球粗钢产量—中国钢铁工业协会.<https://www.chinaisa.org.cn/gxportal/xfglwap/portal/content.html?articleId=394738b8528af54ae7336599ad7c1ead187be06c73c81a764c03e1a6a3a83167&columnId=1bad7c56af746a666e4a4e56e54a9508d344d7bc1498360580613590c16b6c41>
- 241.世界钢铁协会：大幅下调今明两年全球钢铁需求预测值.<https://finance.sina.com.cn/money/future/fmnews/2024-10-15/doc-incsrzcp0967265.shtml>
- 242.世界一流钢铁企业研究及启示—中国钢铁新闻网.[http://www.csteelnews.com/xwzx/jrrd/202501/t20250117\\_96593.html](http://www.csteelnews.com/xwzx/jrrd/202501/t20250117_96593.html)
- 243.宝武继续保持第 44 位！2024 年《财富》世界 500 强揭晓.<https://www.wuganggroup.cn/detail/327270?nId=3154>
- 244.中国宝武 2024 年社会责任报告集中发布活动举行\_湛江市人民政府门户 ....[https://www.zhanjiang.gov.cn/toutiao/content/post\\_2082678.html](https://www.zhanjiang.gov.cn/toutiao/content/post_2082678.html)
- 245.社会责任（ESG）报告.[http://mecc.sinosteel.com/images/file/20230506/20230506181919\\_5284.pdf](http://mecc.sinosteel.com/images/file/20230506/20230506181919_5284.pdf)
- 246.中国钢铁业加快超低排放改造力争 2025 年 80%以上钢铁产能完成改造.<https://www.cdmfund.org/34037.html>
- 247.Untitled.[https://www.spdb.com.cn/today\\_s\\_spd/investor\\_relation/company\\_report/202503/P020250328694016758014.pdf](https://www.spdb.com.cn/today_s_spd/investor_relation/company_report/202503/P020250328694016758014.pdf)
- 248.佳兆业集团境外债务重组获批准，清盘呈请延期至 6 月 30 日；鞍钢股份 ....<https://www.cls.cn/detail/1988499>
- 249.百年鞍钢本钢牵手，钢铁业高质量发展步履稳健-新华网.[http://www.news.cn/2021-08/23/c\\_1127786223.htm](http://www.news.cn/2021-08/23/c_1127786223.htm)
-

- 
- 250.鞍钢股份(000898)公司公告\_鞍钢股份：2024 年年度报告新浪财经  
经 ....[https://vip.stock.finance.sina.com.cn/corp/view/vCB\\_AllBulletinDetail.php?stockid=000898&id=10833182](https://vip.stock.finance.sina.com.cn/corp/view/vCB_AllBulletinDetail.php?stockid=000898&id=10833182)
- 251.江苏沙钢集团有限公司- 2024 年度报告.<http://qxb-pdf-oss-cache.qixin.com/AnBaseinfo/ea0b0e3df1b870407e1297beaed66a24.pdf>
- 252.沙钢股份 6.10(3.92%)\_年度报告\_新浪财经\_新浪  
网.[http://money.finance.sina.com.cn/corp/view/vCB\\_Bulletin.php?stockid=002075&type=list&page\\_type=ndbg](http://money.finance.sina.com.cn/corp/view/vCB_Bulletin.php?stockid=002075&type=list&page_type=ndbg)
- 253.沙钢股份 6.10(3.92%)\_公司公告\_新浪财经\_新浪  
网.[http://vip.stock.finance.sina.com.cn/corp/go.php/vCB\\_AllBulletin/stockid/002075.phtml](http://vip.stock.finance.sina.com.cn/corp/go.php/vCB_AllBulletin/stockid/002075.phtml)
- 254.沙钢股份(002075)公司公告\_沙钢股份：2024 年年度报告新浪财经  
经 ....[http://money.finance.sina.com.cn/corp/view/vCB\\_AllBulletinDetail.php?stockid=002075&id=10854561](http://money.finance.sina.com.cn/corp/view/vCB_AllBulletinDetail.php?stockid=002075&id=10854561)
- 255.首钢股份发布 2024 年度可持续发展报告-首钢集团.<https://www.shougang.com.cn/sgyw/12724.jhtml>
- 256.工业行业价值分析，看这篇就够了- 21 经济  
网.<http://www.21jingji.com/article/20210425/herald/cc8d830ddb1453fe8d8b68fca576045b.html>
- 257.贝恩公司.[https://www.bain.cn/new\\_list.php?type\\_id=14](https://www.bain.cn/new_list.php?type_id=14)
- 258.中信证券开展 2025 年全球投资交流活动助力资本市场高水平双向开放 ....[https://www.group.citic/html/2025/News\\_0620/2944.html](https://www.group.citic/html/2025/News_0620/2944.html)
- 259.增长焦虑：2025 年中国出海品牌联盟营销趋势报告及应对方案（18  
个 ....<https://chuhaizhinan.com/2025/04/01/brand-alliance-marketing-trend-report/>
- 260.关于推进实施钢铁行业超低排放的意  
见.[https://www.mee.gov.cn/xxgk2018/xxgk/xxgk03/201904/t20190429\\_701463.html](https://www.mee.gov.cn/xxgk2018/xxgk/xxgk03/201904/t20190429_701463.html)
-

- 
- 261.中国零排放重卡政策进展、发展挑战及建议.<https://www.cemf.net.cn/storage/tinymce/images/4c2269cde47a94d4351a4aef53caf6a467d29b6c16aa7.pdf>
- 262.生态环境部等五部委联合印发《关于推进实施钢铁行业超低排放的 ....[https://www.mee.gov.cn/xxgk2018/xxgk/xxgk15/201905/t20190505\\_701878.html](https://www.mee.gov.cn/xxgk2018/xxgk/xxgk15/201905/t20190505_701878.html)
- 263.国务院关于 2023 年度环境状况和环境保护目标完成情况的报告\_中国 ....[http://www.npc.gov.cn/c2/c30834/202404/t20240424\\_436701.html](http://www.npc.gov.cn/c2/c30834/202404/t20240424_436701.html)
- 264.靳伟：在中国钢铁工业协会 2018 年理事(扩大)会议上的报告—中国 ....<https://www.chinaisa.org.cn/gxportal/xfgl/portal/content.html?articleId=cf6742d7587b4b2fa3b0af852a75203c1cd9853833db767f395054ee5c451eff&columnId=2f722a08b3bd984fa71b071393238399f94769270c050477994ed95132f92e7c>
- 265.钢铁业节能环保指标持续改善.[http://paper.ce.cn/pad/content/202411/01/content\\_303598.html](http://paper.ce.cn/pad/content/202411/01/content_303598.html)
- 266.姚林：和衷共济和合共赢共建中国钢铁更加美好的未来- 行业动态 ....<http://www.meqs.org.cn/index.php?m=content&c=index&a=show&catid=64&id=396>
- 267.【国家碳达峰试点（唐山）实施方案】-国家发展和改革委员会.[https://www.ndrc.gov.cn/fggz/hjzy/tdftzh/202407/t20240705\\_1391514.html](https://www.ndrc.gov.cn/fggz/hjzy/tdftzh/202407/t20240705_1391514.html)
- 268.钢铁行业碳达峰实施方案成型-新华网.[http://www.news.cn/fortune/2021-12/02/c\\_1128121991.htm](http://www.news.cn/fortune/2021-12/02/c_1128121991.htm)
- 269.2024 年钢铁、水泥、电解铝行业重点政策汇总（国家政策+各省市政策 ....<https://www.co2loop.com/newsinfo/7740986.html>
- 270.北京市氢能产业发展实施方案（2021-2025 年）.[https://www.ncsti.gov.cn/zcfg/zcwj/202108/t20210816\\_38829.html](https://www.ncsti.gov.cn/zcfg/zcwj/202108/t20210816_38829.html)
- 271.2025 年国资简报第 11 期- 湖南省国资委.[https://gzw.hunan.gov.cn/gzw/xxgk\\_71571/gzjb/202507/t20250724\\_33748390.html](https://gzw.hunan.gov.cn/gzw/xxgk_71571/gzjb/202507/t20250724_33748390.html)
- 272.钢铁行业产能置换实施办法.<https://www.gov.cn/zhengce/zhengceku/2021-05/07/5605092/files/4362a77483354513be0fc81be53a4a64.pdf>
-

- 
273. 中国工业品出海路径  
图.<https://www.caitec.org.cn/upfiles/file/2024/8/20240906100347327.pdf>
274. 广东省工业和信息化厅关于河源德润钢铁有限公司二期建设 1 座 100 吨 ....[http://gdii.gd.gov.cn/gkmlpt/content/4/4236/post\\_4236924.html?jump=true](http://gdii.gd.gov.cn/gkmlpt/content/4/4236/post_4236924.html?jump=true)
275. 关于深化生态环境领域依法行政持续强化依法治污的指导意  
见.[https://www.mee.gov.cn/xxgk/2018/xxgk/xxgk03/202111/t20211115\\_960249.html](https://www.mee.gov.cn/xxgk/2018/xxgk/xxgk03/202111/t20211115_960249.html)
276. 中国银保监会关于实施保险公司偿付能力监管规则（II） 有关事项  
的 ....<https://www.nfra.gov.cn/cn/view/pages/governmentDetail.html?docId=1027902&itemId=861&generaltype=1>
277. 中国银保监会关于保险资金投资有关金融产品的通  
知.<https://www.nfra.gov.cn/cn/view/pages/ItemDetail.html?docId=1051063&itemId=928&generaltype=0>
278. 中国人民银行-调查统计司-统计数  
据.<http://www.pbc.gov.cn/diaochaotongjisi/116219/116319/index.html>
279. 财政部税务总局公告 2024 年第 15 号财政部税务总局关于调整出口退  
税 ....<https://www.shui5.cn/article/89/186247.html>
280. 广告产业“组合式”助企政策指  
引.<http://files.anshan.gov.cn/files/ueditor/SCJDG/jsp/upload/file/20250423/1745372223670093132.pdf>
281. 国家税务总局上海市税务局.<https://shanghai.chinatax.gov.cn/zcfw/>
282. 中国 K12 教培行业现状深度分析与发展前景预测报告（2024-2031  
年）.<https://m.chinabaogao.com/baogao/202404/704641.html>
283. 中国环卫车行业现状深度研究与投资前景预测报告（2025-2032  
年）.<https://m.chinabaogao.com/detail/752733.html>
284. 2013 年全国原材料工业经济运行情况- 工业行业资讯- 广西壮族自治区  
区 ....<http://gxt.gxzf.gov.cn/gyxyzx/t3673946.shtml>
-

- 
- 285.2025 年上半年国民经济迎难而上、稳中向好.<http://www.scio.gov.cn/gxzt/dtzt/zt2025/sbnjj2025/index.html>
- 286.从碳到氢，钢铁行业双碳之路风头正劲\_手机新浪网.<https://finance.sina.cn/futuremarket/qsxz/2023-07-28/detail-imzefyzq5187176.d.html>
- 287.报告发布：提出 2060 年我国氢冶金发展路线图-自然资源保护协会.<http://www.nrdc.cn/news/newsinfo?id=1037&cook=2>
- 288.低碳冶金，“氢”装上阵！宝武百万吨级氢基竖炉展示中国钢铁业减碳决心.[http://www.csteelnews.com/qypd/qydt/202310/t20231013\\_80316.html](http://www.csteelnews.com/qypd/qydt/202310/t20231013_80316.html)
- 289.视点 | 发展氢冶金助力钢铁行业深度脱碳的几个对策.[https://sdg-china.net/NewsList/info\\_itemid\\_69639.html](https://sdg-china.net/NewsList/info_itemid_69639.html)
- 290.买入.<https://nesc.cn/timerfiles/upload/report/2023/10/23/15812905.pdf>
- 291.钢铁工业技术转型与区位变迁.<https://www.jjdl.com.cn/CN/10.15957/j.cnki.jjdl.2019.02.018>
- 292.中国碳中和目标下 CCUS 发展挑战与政策激励研究.[https://lce.tsinghua.edu.cn/\\_\\_local/4/04/9C/71FD581493DEEB7465E70F389AD\\_F9342134\\_BDC09.pdf](https://lce.tsinghua.edu.cn/__local/4/04/9C/71FD581493DEEB7465E70F389AD_F9342134_BDC09.pdf)
- 293.河钢集团连续 16 年上榜世界 500 强\_河北经济网.<http://www.hbjjrb.com/system/2024/08/07/101361057.shtml>
- 294.2025 年钢铁行业智能制造联盟年会暨数字化转型推进中心工作会议在 ....<https://www.citicsteel.com/index.php?m=content&c=index&a=show&catid=19&id=91>
- 295.刘青-教授/教授级高工/研究员-绿色低碳钢铁冶金全国重点实验室.<https://sklam.ustb.edu.cn/sysgk/gzzd/js/c26875f7cacd418da7085e1de6083acb.htm>
- 296.北京科技大学战略合作协议签字仪式暨《南钢工业 4.0 规划咨询报告》 ....<https://news.ustb.edu.cn/info/1111/3567.htm>
- 297.智能制造典型场景参考指引.<https://www.gov.cn/zhengce/zhengceku/202504/P020250427538942317583.pdf>
-

- 
298. 工信部连发七文解读《中国制造 2025》 资本市场掀波澜.[https://gzw.wuhan.gov.cn/bmdt/gzsd/202004/t20200428\\_1182448.html](https://gzw.wuhan.gov.cn/bmdt/gzsd/202004/t20200428_1182448.html)
299. 工信部印发《智能制造典型场景参考指引（2025 年版）》.<https://finance.sina.com.cn/money/future/indu/2025-04-27/doc-ineuqiwf7828188.shtml>
300. 工信部印发《智能制造典型场景参考指引（2025 年版）》—中国钢铁 ....<https://www.chinaisa.org.cn/gxportal/xfglwap/portal/content.html?articleId=35ba924ea693934c1328b061a2a3f54341e52619e5e4bae15126f4552c67c499&columnId=3683d857cc4577e4cb75f76522b7b82cda039ef70be46ee37f9385ed3198f68a>
301. 中信泰富特钢 2 个项目入选工信部 2024 年钢铁行业重点场景数字化转型 ....<https://www.citicsteel.com/index.php?m=content&c=index&a=show&catid=19&id=67>
302. 房地产研究报告\_中国房地产行业市场需求预测与投资战略规划分析 ....<https://bg.qianzhan.com/report/detail/6982ee1184764422.html>
303. 信用评级报告.<https://www.600282.net/Upload/files/2020-05-21%E5%8D%97%E4%BA%AC%E9%92%A2%E9%93%81%E8%82%A1%E4%BB%BD%E6%9C%89%E9%99%90%E5%85%AC%E5%8F%B82020%E5%B9%B4%E5%BA%A6%E7%AC%AC%E4%B8%80%E6%9C%9F%E4%B8%AD%E6%9C%9F%E7%A5%A8%E6%8D%AE%E4%B8%BB%E4%BD%93%E5%8F%8A%E5%80%BA%E9%A1%B9%E4%BF%A1%E7%94%A8%E8%AF%84%E7%BA%A7%E6%8A%A5%E5%91%8A.pdf>
304. 拿下中国 60%铁矿石市场，澳大利亚凭什么？ - 知乎.<https://zhuanlan.zhihu.com/p/683745037>
305. 河北省钢铁行业 PMI 指数.<http://www.hebyjxh.com/pmi.html>
306. 2024 年预亏损超 50 亿元本钢板材将交出史上最差年报.<https://finance.sina.com.cn/stock/relnews/cn/2025-01-27/doc-inehmrat8512834.shtml>
307. 钢协三季度信息发布会呼吁：加强自律提升经济效益维护钢铁行业 ....[http://www.csteelnews.com/xwzx/hydt/202410/t20241025\\_93863.html](http://www.csteelnews.com/xwzx/hydt/202410/t20241025_93863.html)
308. 上半年粗钢产量稳中有降钢铁业经济效益同比改善\_国内行业动态\_省 ....[https://gxt.fujian.gov.cn/zwgk/xw/hydt/xydt/202508/t20250804\\_6987551.htm](https://gxt.fujian.gov.cn/zwgk/xw/hydt/xydt/202508/t20250804_6987551.htm)
-

- 
- 309.北京首钢股份有限公司主体与相关债项 2023 年度跟踪评级报告.[http://file.finance.sina.com.cn/211.154.219.97:9494/MRGG/CNSESZ\\_STOCK/2023/2023-6/2023-06-14/9291407.PDF](http://file.finance.sina.com.cn/211.154.219.97:9494/MRGG/CNSESZ_STOCK/2023/2023-6/2023-06-14/9291407.PDF)
- 310.节能攻坚，钢铁行业可以这样干——中国钢铁新闻网.[http://www.csteelnews.com/xwzx/hydt/202405/t20240520\\_88225.html](http://www.csteelnews.com/xwzx/hydt/202405/t20240520_88225.html)
- 311.【全面绿色转型·专家谈 | 绿色转型风劲吹产业结构焕新颜】-国家发展 ....[https://www.ndrc.gov.cn/xwdt/spfg/zfzjt/202409/t20240913\\_1392993.html](https://www.ndrc.gov.cn/xwdt/spfg/zfzjt/202409/t20240913_1392993.html)
- 312.中国炼焦行业协会崔丕江会长等参加 2021 年煤钢焦中长期合同洽谈 ....<https://www.cnljxh.com/wap/news/show.php?id=238>
- 313.中国炼焦行业协会.<https://www.cnljxh.com/wap/news/show.php?id=538>
- 314.中国炼焦行业协会.<https://www.cnljxh.com/news/?classid=12>
- 315.世界金属导报：2022 年世界钢铁工业十大产业要闻.<https://www.pioneer-pku.com/Industry-information/364.html>
- 316.并购招商赋能地方产业转型升级.<https://www.jingjidaokan.com/icms/null/null/ns:LHQ6LGY6LGM6MmM5ZTg1MzM5NmVjODdiYzAxOTc4NzA3ZWMTAwMWMscDosYTosbTo=/show.vsmI>
- 317.【2025 品牌故事】中国宝武：践行“三个转变”锻造世界一流钢铁品牌 ....[http://www.csteelnews.com/xwzx/djbd/202505/t20250511\\_99684.html](http://www.csteelnews.com/xwzx/djbd/202505/t20250511_99684.html)
- 318.【干货】2023 年中国钢铁物流行业产业链现状及市场竞争格局分析 ....<https://bg.qianzhan.com/trends/detail/506/231228-f18e784d.html>
- 319.鞍钢集团网站.<http://www.ansteel.cn/>
- 320.物流供需运行总体平稳结构升级助力质效趋升——2025 年 1-5 月中国 ....<http://www.clic.org.cn/wltjwlyx/313341.jhtml>
- 321.重点产业专利信息服务平台.<https://chinaip.cnipa.gov.cn/>
-



---

322.2024 年中国钢铁物流行业产业链图谱、货运量、竞争格局及发展趋势 ....<https://www.chyxx.com/industry/1200276.html>

323.高矿价仍是钢铁行业利润大幅缩减的主因——自律控产降库存势在必行.[http://www.csteelnews.com/xwzx/jrrd/202405/t20240520\\_88211.html](http://www.csteelnews.com/xwzx/jrrd/202405/t20240520_88211.html)

324.钢铁业“十四五”将实现碳达峰，低碳转型仍面临“三重阻碍”.[http://www.ideacarbon.org/news\\_free/57151](http://www.ideacarbon.org/news_free/57151)

325.天津市金属材料行业协会预警信息简报 2025 年第 01 期（总第 27 期）.[https://shangwujia.tj.gov.cn/tjsswjzz/ztl/ztl/swfzjsgz1/gpmy/yszn/202501/t20250126\\_6846103.html](https://shangwujia.tj.gov.cn/tjsswjzz/ztl/ztl/swfzjsgz1/gpmy/yszn/202501/t20250126_6846103.html)

326.南京钢铁股份有限公司 2022 年度业绩说明.<https://www.600282.net/Upload/files/2022%E5%B9%B4%E4%B8%9A%E7%BB%A9%E8%AF%B4%E6%98%8E%E4%BC%9A.pdf>
